# Supplementary material
Source: PubMed Central journal article supplement (PMC3215828)
Supplement: NIHMS317332-supplement-01.pdf [file NIHMS317332-supplement-01.pdf]

Analysis Information

|                         |                                 |               |                     |
|-------------------------|---------------------------------|---------------|---------------------|
| Report Type             | Protein-Peptide Summary by Spot | Analysis Type | Combined (MS+MS/MS) |
| Sample Set Name         | RAJA110207                      | Database      | NCBI nr             |
| Analysis Name           | Sheep                           | Creation Date | #####               |
| Reported By             | 02/17/2011 11:45:57 - admin     | Last Modified | #####               |
| MS Acq. : Proc. Methods | (Unspecified) : (Unspecified)   |               |                     |
| Interpretation Method   | (Unspecified)                   |               |                     |

| Gel Idx/Pos    |                                          | 2/A3     | Instr./Gel Origin      |  | AB4700/110211A |            | Process Status |             | Analysis Succeeded |               |               |                 |                   |
|----------------|------------------------------------------|----------|------------------------|--|----------------|------------|----------------|-------------|--------------------|---------------|---------------|-----------------|-------------------|
| Plate [#] Name |                                          | [1] 8907 | Instrument Sample Name |  |                |            | Spectra        |             | 8                  |               |               |                 |                   |
| Rank           | Protein Name                             |          | Species                |  | Accession No.  | Protein MW | Protein PI     | Pept. Count | Protein Score      | Protein Score | Protein Score | Total Ion Score | Total Ion C. I. % |
| 1              | elongation factor 2 [Callithrix jacchus] |          |                        |  | gi 297206888   | 95249.9    | 6.41           | 23          | 672                | 100           | 519           | 100             |                   |

| Peptide Information |             |         |       |            |          |                          |           |         |                                           |  |  | Rank | Result Type |
|---------------------|-------------|---------|-------|------------|----------|--------------------------|-----------|---------|-------------------------------------------|--|--|------|-------------|
| Calc. Mass          | Obsrv. Mass | ± da    | ± ppm | Start Seq. | End Seq. | Sequence                 | Ion Score | C. I. % | Modification                              |  |  |      |             |
| 890.5093            | 890.4021    | -0.1072 | -120  | 499        | 506      | FSVSPVVR                 |           |         |                                           |  |  |      | Mascot      |
| 969.5475            | 969.4302    | -0.1173 | -121  | 717        | 726      | GGGQIPTAR                |           |         |                                           |  |  |      | Mascot      |
| 1013.501            | 1013.3802   | -0.1208 | -119  | 240        | 249      | GEGQLGPAER               |           |         |                                           |  |  |      | Mascot      |
| 1091.5844           | 1091.4508   | -0.1336 | -122  | 2          | 10       | VNFTVDQIR                | 53        | 98.373  |                                           |  |  |      | Mascot      |
| 1091.5844           | 1091.4508   | -0.1336 | -122  | 2          | 10       | VNFTVDQIR                |           |         |                                           |  |  |      | Mascot      |
| 1107.6409           | 1107.4938   | -0.1471 | -133  | 416        | 426      | VFSGLVSTGLK              |           |         |                                           |  |  |      | Mascot      |
| 1125.6487           | 1125.5104   | -0.1383 | -123  | 717        | 727      | GGGQIPTARR               |           |         |                                           |  |  |      | Mascot      |
| 1138.5164           | 1138.3916   | -0.1248 | -110  | 639        | 647      | YEWVDAEAR                |           |         |                                           |  |  |      | Mascot      |
| 1208.5034           | 1208.3651   | -0.1383 | -114  | 689        | 698      | EGALCEENMR               |           |         | Carbamidomethyl (C)[5]                    |  |  |      | Mascot      |
| 1224.4983           | 1224.3469   | -0.1514 | -124  | 689        | 698      | EGALCEENMR               |           |         | Carbamidomethyl (C)[5], Oxidation (M)[9]  |  |  |      | Mascot      |
| 1274.7103           | 1274.5653   | -0.145  | -114  | 440        | 449      | EDLYLKPIQR               |           |         |                                           |  |  |      | Mascot      |
| 1378.7147           | 1378.5527   | -0.162  | -118  | 728        | 739      | CLYASVLTAPR              | 78        | 99.995  | Carbamidomethyl (C)[1]                    |  |  |      | Mascot      |
| 1378.7147           | 1378.5527   | -0.162  | -118  | 728        | 739      | CLYASVLTAPR              |           |         | Carbamidomethyl (C)[1]                    |  |  |      | Mascot      |
| 1402.8053           | 1402.6438   | -0.1615 | -115  | 439        | 449      | KEDLYLKPIQR              |           |         |                                           |  |  |      | Mascot      |
| 1430.7386           | 1430.5764   | -0.1622 | -113  | 236        | 249      | FAAKGEGQLGPAER           |           |         |                                           |  |  |      | Mascot      |
| 1525.7434           | 1525.5677   | -0.1757 | -115  | 260        | 272      | LWGRYFDPATGK             |           |         |                                           |  |  |      | Mascot      |
| 1534.8158           | 1534.6367   | -0.1791 | -117  | 727        | 739      | RCLYASVLTAPR             |           |         | Carbamidomethyl (C)[2]                    |  |  |      | Mascot      |
| 1615.7645           | 1615.5801   | -0.1844 | -114  | 482        | 495      | TGTTTFEHAHNMNR           | 52        | 97.914  |                                           |  |  |      | Mascot      |
| 1615.7645           | 1615.5801   | -0.1844 | -114  | 482        | 495      | TGTTTFEHAHNMNR           |           |         |                                           |  |  |      | Mascot      |
| 1631.7595           | 1631.5674   | -0.1921 | -118  | 482        | 495      | TGTTTFEHAHNMNR           |           |         | Oxidation (M)[13]                         |  |  |      | Mascot      |
| 1742.8384           | 1742.6367   | -0.2017 | -116  | 634        | 647      | YLAKEYWDVAEAR            |           |         |                                           |  |  |      | Mascot      |
| 1742.8384           | 1742.6367   | -0.2017 | -116  | 634        | 647      | YLAKEYWDVAEAR            | 84        | 99.999  |                                           |  |  |      | Mascot      |
| 1799.8962           | 1799.6888   | -0.2074 | -115  | 786        | 801      | AYLPVNESFGFTADLR         |           |         |                                           |  |  |      | Mascot      |
| 1799.8962           | 1799.6888   | -0.2074 | -115  | 786        | 801      | AYLPVNESFGFTADLR         |           |         |                                           |  |  |      | Mascot      |
| 2143.0779           | 2142.834    | -0.2439 | -114  | 606        | 625      | ARPPFDGLAEDIDKGEVS AR    | 117       | 100     |                                           |  |  |      | Mascot      |
| 2143.0779           | 2142.834    | -0.2439 | -114  | 606        | 625      | ARPPFDGLAEDIDKGEVS AR    | 31        | 0       |                                           |  |  |      | Mascot      |
| 2220.1545           | 2219.895    | -0.2595 | -117  | 163        | 180      | ALLELOLEPEELYQTQFR       | 104       | 100     |                                           |  |  |      | Mascot      |
| 2220.1545           | 2219.895    | -0.2595 | -117  | 163        | 180      | ALLELOLEPEELYQTQFR       |           |         |                                           |  |  |      | Mascot      |
| 2233.1321           | 2232.873    | -0.2591 | -116  | 648        | 667      | KIWCFGPDGTGNILDTIT K     |           |         | Carbamidomethyl (C)[4]                    |  |  |      | Mascot      |
| 2327.0681           | 2326.7966   | -0.2715 | -117  | 367        | 386      | YRCCLLYEGPPDDEAAM GIK    |           |         | Carbamidomethyl (C)[3]                    |  |  |      | Mascot      |
| 2343.063            | 2342.7991   | -0.2639 | -113  | 367        | 386      | YRCCLLYEGPPDDEAAM GIK    |           |         | Carbamidomethyl (C)[3], Oxidation (M)[17] |  |  |      | Mascot      |
| 2498.1438           | 2497.9197   | -0.2241 | -90   | 677        | 698      | DSVAGFQWATKEGALC EENMR   |           |         | Carbamidomethyl (C)[17]                   |  |  |      | Mascot      |
| 2576.3057           | 2576.0083   | -0.2974 | -115  | 121        | 144      | VTDGALVVDCVSGVCV QTETVLR |           |         | Carbamidomethyl (C)[11,16]                |  |  |      | Mascot      |

|   |                                    |  |            |       |      |    |     |     |     |     |  |
|---|------------------------------------|--|------------|-------|------|----|-----|-----|-----|-----|--|
| 2 | elongation factor 2 [Homo sapiens] |  | gi 4503483 | 95277 | 6.41 | 22 | 662 | 100 | 519 | 100 |  |
|---|------------------------------------|--|------------|-------|------|----|-----|-----|-----|-----|--|

| Peptide Information |             |         |       |            |          |                          |           |         |                                           |  |  | Rank | Result Type |
|---------------------|-------------|---------|-------|------------|----------|--------------------------|-----------|---------|-------------------------------------------|--|--|------|-------------|
| Calc. Mass          | Obsrv. Mass | ± da    | ± ppm | Start Seq. | End Seq. | Sequence                 | Ion Score | C. I. % | Modification                              |  |  |      |             |
| 890.5093            | 890.4021    | -0.1072 | -120  | 499        | 506      | FSVSPVVR                 |           |         |                                           |  |  |      | Mascot      |
| 969.5475            | 969.4302    | -0.1173 | -121  | 717        | 726      | GGGQIPTAR                |           |         |                                           |  |  |      | Mascot      |
| 1013.501            | 1013.3802   | -0.1208 | -119  | 240        | 249      | GEGQLGPAER               |           |         |                                           |  |  |      | Mascot      |
| 1091.5844           | 1091.4508   | -0.1336 | -122  | 2          | 10       | VNFTVDQIR                | 53        | 98.373  |                                           |  |  |      | Mascot      |
| 1091.5844           | 1091.4508   | -0.1336 | -122  | 2          | 10       | VNFTVDQIR                |           |         |                                           |  |  |      | Mascot      |
| 1107.6409           | 1107.4938   | -0.1471 | -133  | 416        | 426      | VFSGLVSTGLK              |           |         |                                           |  |  |      | Mascot      |
| 1125.6487           | 1125.5104   | -0.1383 | -123  | 717        | 727      | GGGQIPTARR               |           |         |                                           |  |  |      | Mascot      |
| 1138.5164           | 1138.3916   | -0.1248 | -110  | 639        | 647      | YEWVDAEAR                |           |         |                                           |  |  |      | Mascot      |
| 1208.5034           | 1208.3651   | -0.1383 | -114  | 689        | 698      | EGALCEENMR               |           |         | Carbamidomethyl (C)[5]                    |  |  |      | Mascot      |
| 1224.4983           | 1224.3469   | -0.1514 | -124  | 689        | 698      | EGALCEENMR               |           |         | Carbamidomethyl (C)[5], Oxidation (M)[9]  |  |  |      | Mascot      |
| 1274.7103           | 1274.5653   | -0.145  | -114  | 440        | 449      | EDLYLKPIQR               |           |         |                                           |  |  |      | Mascot      |
| 1378.7147           | 1378.5527   | -0.162  | -118  | 728        | 739      | CLYASVLTAPR              | 78        | 99.995  | Carbamidomethyl (C)[1]                    |  |  |      | Mascot      |
| 1378.7147           | 1378.5527   | -0.162  | -118  | 728        | 739      | CLYASVLTAPR              |           |         | Carbamidomethyl (C)[1]                    |  |  |      | Mascot      |
| 1402.8053           | 1402.6438   | -0.1615 | -115  | 439        | 449      | KEDLYLKPIQR              |           |         |                                           |  |  |      | Mascot      |
| 1430.7386           | 1430.5764   | -0.1622 | -113  | 236        | 249      | FAAKGEGQLGPAER           |           |         |                                           |  |  |      | Mascot      |
| 1534.8158           | 1534.6367   | -0.1791 | -117  | 727        | 739      | RCLYASVLTAPR             |           |         | Carbamidomethyl (C)[2]                    |  |  |      | Mascot      |
| 1615.7645           | 1615.5801   | -0.1844 | -114  | 482        | 495      | TGTTTFEHAHNMNR           | 52        | 97.914  |                                           |  |  |      | Mascot      |
| 1615.7645           | 1615.5801   | -0.1844 | -114  | 482        | 495      | TGTTTFEHAHNMNR           |           |         |                                           |  |  |      | Mascot      |
| 1631.7595           | 1631.5674   | -0.1921 | -118  | 482        | 495      | TGTTTFEHAHNMNR           |           |         | Oxidation (M)[13]                         |  |  |      | Mascot      |
| 1742.8384           | 1742.6367   | -0.2017 | -116  | 634        | 647      | YLAKEYWDVAEAR            |           |         |                                           |  |  |      | Mascot      |
| 1742.8384           | 1742.6367   | -0.2017 | -116  | 634        | 647      | YLAKEYWDVAEAR            | 84        | 99.999  |                                           |  |  |      | Mascot      |
| 1799.8962           | 1799.6888   | -0.2074 | -115  | 786        | 801      | AYLPVNESFGFTADLR         |           |         |                                           |  |  |      | Mascot      |
| 1799.8962           | 1799.6888   | -0.2074 | -115  | 786        | 801      | AYLPVNESFGFTADLR         | 117       | 100     |                                           |  |  |      | Mascot      |
| 2143.0779           | 2142.834    | -0.2439 | -114  | 606        | 625      | ARPPFDGLAEDIDKGEVS AR    |           |         |                                           |  |  |      | Mascot      |
| 2143.0779           | 2142.834    | -0.2439 | -114  | 606        | 625      | ARPPFDGLAEDIDKGEVS AR    | 31        | 0       |                                           |  |  |      | Mascot      |
| 2220.1545           | 2219.895    | -0.2595 | -117  | 163        | 180      | ALLELOLEPEELYQTQFR       | 104       | 100     |                                           |  |  |      | Mascot      |
| 2220.1545           | 2219.895    | -0.2595 | -117  | 163        | 180      | ALLELOLEPEELYQTQFR       |           |         |                                           |  |  |      | Mascot      |
| 2233.1321           | 2232.873    | -0.2591 | -116  | 648        | 667      | KIWCFGPDGTGNILDTIT K     |           |         | Carbamidomethyl (C)[4]                    |  |  |      | Mascot      |
| 2327.0681           | 2326.7966   | -0.2715 | -117  | 367        | 386      | YRCCLLYEGPPDDEAAM GIK    |           |         | Carbamidomethyl (C)[3]                    |  |  |      | Mascot      |
| 2343.063            | 2342.7991   | -0.2639 | -113  | 367        | 386      | YRCCLLYEGPPDDEAAM GIK    |           |         | Carbamidomethyl (C)[3], Oxidation (M)[17] |  |  |      | Mascot      |
| 2498.1438           | 2497.9197   | -0.2241 | -90   | 677        | 698      | DSVAGFQWATKEGALC EENMR   |           |         | Carbamidomethyl (C)[17]                   |  |  |      | Mascot      |
| 2576.3057           | 2576.0083   | -0.2974 | -115  | 121        | 144      | VTDGALVVDCVSGVCV QTETVLR |           |         | Carbamidomethyl (C)[11,16]                |  |  |      | Mascot      |

|   |                                                 |  |              |         |      |    |     |     |     |     |  |
|---|-------------------------------------------------|--|--------------|---------|------|----|-----|-----|-----|-----|--|
| 3 | PREDICTED: elongation factor 2 [Macaca mulatta] |  | gi 297275803 | 95262.9 | 6.41 | 22 | 661 | 100 | 519 | 100 |  |
|---|-------------------------------------------------|--|--------------|---------|------|----|-----|-----|-----|-----|--|

| Peptide Information |             |         |       |            |          |             |           |         |                                          |  |  | Rank | Result Type |
|---------------------|-------------|---------|-------|------------|----------|-------------|-----------|---------|------------------------------------------|--|--|------|-------------|
| Calc. Mass          | Obsrv. Mass | ± da    | ± ppm | Start Seq. | End Seq. | Sequence    | Ion Score | C. I. % | Modification                             |  |  |      |             |
| 890.4578            | 890.4021    | -0.0557 | -63   | 276        | 284      | SATSPDGKK   |           |         |                                          |  |  |      | Mascot      |
| 969.5475            | 969.4302    | -0.1173 | -121  | 717        | 726      | GGGQIPTAR   |           |         |                                          |  |  |      | Mascot      |
| 1013.501            | 1013.3802   | -0.1208 | -119  | 240        | 249      | GEGQLGPAER  |           |         |                                          |  |  |      | Mascot      |
| 1091.5844           | 1091.4508   | -0.1336 | -122  | 2          | 10       | VNFTVDQIR   | 53        | 98.373  |                                          |  |  |      | Mascot      |
| 1091.5844           | 1091.4508   | -0.1336 | -122  | 2          | 10       | VNFTVDQIR   |           |         |                                          |  |  |      | Mascot      |
| 1107.6409           | 1107.4938   | -0.1471 | -133  | 416        | 426      | VFSGLVSTGLK |           |         |                                          |  |  |      | Mascot      |
| 1125.6487           | 1125.5104   | -0.1383 | -123  | 717        | 727      | GGGQIPTARR  |           |         |                                          |  |  |      | Mascot      |
| 1138.5164           | 1138.3916   | -0.1248 | -110  | 639        | 647      | YEWVDAEAR   |           |         |                                          |  |  |      | Mascot      |
| 1208.5034           | 1208.3651   | -0.1383 | -114  | 689        | 698      | EGALCEENMR  |           |         | Carbamidomethyl (C)[5]                   |  |  |      | Mascot      |
| 1224.4983           | 1224.3469   | -0.1514 | -124  | 689        | 698      | EGALCEENMR  |           |         | Carbamidomethyl (C)[5], Oxidation (M)[9] |  |  |      | Mascot      |
| 1274.7103           | 1274.5653   | -0.145  | -114  | 440        | 449      | EDLYLKPIQR  |           |         |                                          |  |  |      | Mascot      |
| 1378.7147           | 1378.5527   | -0.162  | -118  | 728        | 739      | CLYASVLTAPR | 78        | 99.995  | Carbamidomethyl (C)[1]                   |  |  |      | Mascot      |
| 1378.7147           | 1378.5527   | -0.162  | -118  | 728        | 739      | CLYASVLTAPR |           |         | Carbamidomethyl (C)[1]                   |  |  |      | Mascot      |

|   |                                               |              |         |      |    |     |     |     |     |
|---|-----------------------------------------------|--------------|---------|------|----|-----|-----|-----|-----|
| 4 | RecName: Full=Elongation factor 2; Short=EF-2 | gi 298286925 | 95235.8 | 6.22 | 21 | 652 | 100 | 519 | 100 |
|---|-----------------------------------------------|--------------|---------|------|----|-----|-----|-----|-----|

| Peptide Information |             |          |           |            |          | Ion Score                   | C.I. % | Modification | Rank                                      | Result Type |
|---------------------|-------------|----------|-----------|------------|----------|-----------------------------|--------|--------------|-------------------------------------------|-------------|
| Calc. Mass          | Obsrv. Mass | $\pm$ da | $\pm$ ppm | Start Seq. | End Seq. |                             |        |              |                                           |             |
| 890.6093            | 890.4021    | -0.1072  | -120      | 499        | 506      | FSVSPVWR                    |        |              |                                           | Mascot      |
| 960.5475            | 960.4302    | -0.1173  | -121      | 717        | 726      | GGGQIPTAR                   |        |              |                                           | Mascot      |
| 1013.501            | 1013.3802   | -0.1208  | -119      | 240        | 249      | GGQLQPAER                   |        |              |                                           | Mascot      |
| 1091.5844           | 1091.4508   | -0.1336  | -122      | 2          | 10       | VNFTVDQIR                   |        |              |                                           | Mascot      |
| 1091.5844           | 1091.5844   | -0.1336  | -122      | 2          | 10       | VNFTVDQIR                   | 53     | 98.373       |                                           | Mascot      |
| 1125.6487           | 1125.5104   | -0.1383  | -123      | 717        | 727      | GGGQIPTARR                  |        |              |                                           | Mascot      |
| 1138.5164           | 1138.3916   | -0.1248  | -110      | 639        | 647      | YEWDAVEAR                   |        |              |                                           | Mascot      |
| 1208.5034           | 1208.3651   | -0.1363  | -114      | 689        | 698      | EGALCENMIR                  |        |              | Carbamidomethyl (C)[5]                    | Mascot      |
| 1224.4983           | 1224.3469   | -0.1514  | -124      | 689        | 698      | EGALCENMIR                  |        |              | Carbamidomethyl (C)[5], Oxidation (M)[9]  | Mascot      |
| 1274.7103           | 1274.5653   | -0.145   | -114      | 440        | 449      | EDLYKPIQR                   |        |              |                                           | Mascot      |
| 1378.7147           | 1378.5527   | -0.162   | -118      | 728        | 739      | CLYASVLTQAPR                | 78     | 99.995       | Carbamidomethyl (C)[1]                    | Mascot      |
| 1378.7147           | 1378.5527   | -0.162   | -118      | 728        | 739      | CLYASVLTQAPR                |        |              | Carbamidomethyl (C)[1]                    | Mascot      |
| 1402.8053           | 1402.6438   | -0.1615  | -115      | 439        | 449      | KEDLYKPIQR                  |        |              |                                           | Mascot      |
| 1430.7386           | 1430.5764   | -0.1622  | -113      | 236        | 249      | FAAKGEGQLGPAER              |        |              |                                           | Mascot      |
| 1513.58             | 1534.6367   | -0.1781  | -177      | 727        | 739      | RLYASVLTQAPR                |        |              | Carbamidomethyl (C)[2]                    | Mascot      |
| 1615.7645           | 1615.5801   | -0.1844  | -114      | 482        | 495      | TGTTTFFEAHNMR               | 52     | 97.914       |                                           | Mascot      |
| 1615.7645           | 1615.5801   | -0.1844  | -114      | 482        | 495      | TGTTTFFEAHNMR               |        |              |                                           | Mascot      |
| 1631.7595           | 1631.5674   | -0.1921  | -118      | 482        | 495      | TGTTTFFEAHNMR               |        |              | Oxidation (M)[13]                         | Mascot      |
| 1742.8384           | 1742.6367   | -0.2017  | -116      | 634        | 647      | YLAEKYEWDAVEAR              |        |              |                                           | Mascot      |
| 1742.8384           | 1742.6367   | -0.2017  | -116      | 634        | 647      | YLAEKYEWDAVEAR              | 84     | 99.999       |                                           | Mascot      |
| 1799.8962           | 1799.6888   | -0.2074  | -115      | 786        | 801      | AYLPVNESGFTADLR             |        |              |                                           | Mascot      |
| 1799.8962           | 1799.6888   | -0.2074  | -115      | 786        | 801      | AYLPVNESGFTADLR             | 117    | 100          |                                           | Mascot      |
| 2143.0779           | 2142.834    | -0.2439  | -114      | 606        | 625      | ARPPDGLAEDIKGEVS<br>AR      |        |              |                                           | Mascot      |
| 2143.0779           | 2142.834    | -0.2439  | -114      | 606        | 625      | ARPPDGLAEDIKGEVS<br>AR      | 31     | 0            |                                           | Mascot      |
| 2220.1545           | 2219.895    | -0.2595  | -117      | 163        | 180      | ALLELQLEPEELYQTFFOR         |        |              |                                           | Mascot      |
| 2220.1545           | 2219.895    | -0.2595  | -117      | 163        | 180      | ALLELQLEPEELYQTFFOR         | 104    | 100          |                                           | Mascot      |
| 2233.1321           | 2232.873    | -0.2591  | -116      | 648        | 667      | KIWCFGPDGTGPNLTDIT<br>K     |        |              | Carbamidomethyl (C)[4]                    | Mascot      |
| 2327.0681           | 2326.7966   | -0.2715  | -117      | 367        | 386      | YRCLELYGGPPDDEAAM<br>GIK    |        |              | Carbamidomethyl (C)[3]                    | Mascot      |
| 2343.063            | 2342.7991   | -0.2639  | -113      | 367        | 386      | YRCLELYGGPPDDEAAM<br>GIK    |        |              | Carbamidomethyl (C)[3], Oxidation (M)[17] | Mascot      |
| 2498.1438           | 2497.9197   | -0.2241  | -90       | 677        | 698      | DSVAVGFQWATKEGALC<br>EENMR  |        |              | Carbamidomethyl (C)[17]                   | Mascot      |
| 2576.3057           | 2576.0083   | -0.2974  | -115      | 121        | 144      | VTDGLAVVDCVSGVCV<br>QTETLVR |        |              | Carbamidomethyl (C)[11,16]                | Mascot      |

|   |                                                   |           |         |      |    |     |     |     |     |
|---|---------------------------------------------------|-----------|---------|------|----|-----|-----|-----|-----|
| 5 | elongation factor 2 [ <i>Cricetulus griseus</i> ] | gi 600159 | 95248.9 | 6.41 | 21 | 651 | 100 | 519 | 100 |
|---|---------------------------------------------------|-----------|---------|------|----|-----|-----|-----|-----|

| Peptide Information |             |         |       |            |          |                             |           |        |                                           | Rank   | Result Type |
|---------------------|-------------|---------|-------|------------|----------|-----------------------------|-----------|--------|-------------------------------------------|--------|-------------|
| Calc. Mass          | Obsrv. Mass | ± da    | ± ppm | Start Seq. | End Seq. | Sequence                    | Ion Score | C.I. % | Modification                              |        |             |
| 890.5093            | 890.4021    | -0.1072 | -120  | 499        | 506      | FVSPVPVR                    |           |        |                                           | Mascot |             |
| 968.5475            | 969.4302    | -0.1173 | -121  | 717        | 726      | GGGQIPTAR                   |           |        |                                           | Mascot |             |
| 1013.5011           | 1013.3802   | -0.1208 | -119  | 240        | 249      | GEGQLGPAER                  |           |        |                                           | Mascot |             |
| 1091.5844           | 1091.4508   | -0.1336 | -122  | 2          | 10       | VNFTVDQIR                   |           |        |                                           | Mascot |             |
| 1091.5844           | 1091.4508   | -0.1336 | -122  | 2          | 10       | VNFTVDQIR                   | 53        | 98.373 |                                           | Mascot |             |
| 1125.6487           | 1125.5104   | -0.1383 | -123  | 717        | 727      | GGGQIPTARR                  |           |        |                                           | Mascot |             |
| 1138.5164           | 1138.3916   | -0.1248 | -110  | 639        | 647      | YEWDFVAEAR                  |           |        |                                           | Mascot |             |
| 1208.5034           | 1208.3651   | -0.1383 | -114  | 689        | 698      | EGALCEENMR                  |           |        | Carbamidomethyl (C)[5]                    | Mascot |             |
| 1224.4983           | 1224.3469   | -0.1514 | -124  | 689        | 698      | EGALCEENMR                  |           |        | Carbamidomethyl (C)[5], Oxidation (M)[9]  | Mascot |             |
| 1274.7103           | 1274.5653   | -0.145  | -114  | 440        | 449      | EDLYKPIQR                   |           |        |                                           | Mascot |             |
| 1378.7147           | 1378.5527   | -0.162  | -118  | 728        | 739      | CLYASVLTAQPR                | 78        | 99.995 | Carbamidomethyl (C)[1]                    | Mascot |             |
| 1378.7147           | 1378.5527   | -0.162  | -118  | 728        | 739      | CLYASVLTAQPR                |           |        | Carbamidomethyl (C)[1]                    | Mascot |             |
| 1402.8053           | 1402.6438   | -0.1615 | -115  | 439        | 449      | KEDLYKPIQR                  |           |        |                                           | Mascot |             |
| 1430.7386           | 1430.5764   | -0.1622 | -113  | 236        | 249      | FAKGGQLGPAER                |           |        |                                           | Mascot |             |
| 1534.8158           | 1534.6367   | -0.1791 | -117  | 727        | 739      | RLYASVLTAQPR                |           |        | Carbamidomethyl (C)[2]                    | Mascot |             |
| 1615.7645           | 1615.5801   | -0.1844 | -114  | 482        | 495      | TGTTTFEHAHMR                | 52        | 97.914 |                                           | Mascot |             |
| 1615.7645           | 1615.5801   | -0.1844 | -114  | 482        | 495      | TGTTTFEHAHMR                |           |        |                                           | Mascot |             |
| 1631.7595           | 1631.5674   | -0.1921 | -118  | 482        | 495      | TGTTTFEHAHMR                |           |        | Oxidation (M)[13]                         | Mascot |             |
| 1742.8384           | 1742.6367   | -0.2017 | -116  | 634        | 647      | YLAEKYEWDFVAEAR             |           |        |                                           | Mascot |             |
| 1742.8384           | 1742.6367   | -0.2017 | -116  | 634        | 647      | YLAEKYEWDFVAEAR             | 84        | 99.999 |                                           | Mascot |             |
| 1799.8962           | 1799.6888   | -0.2074 | -115  | 786        | 801      | AYLPVNESFGTDALR             |           |        |                                           | Mascot |             |
| 1799.8962           | 1799.6888   | -0.2074 | -115  | 786        | 801      | AYLPVNESFGTDALR             | 117       | 100    |                                           | Mascot |             |
| 2143.0779           | 2142.834    | -0.2439 | -114  | 606        | 625      | ARPPDGLAEDIDKGEVS<br>AR     |           |        |                                           | Mascot |             |
| 2143.0779           | 2142.834    | -0.2439 | -114  | 606        | 625      | ARPPDGLAEDIDKGEVS<br>AR     | 31        | 0      |                                           | Mascot |             |
| 2220.1545           | 2219.895    | -0.2595 | -117  | 163        | 180      | ALLELQLEPEELYQTFOR          | 104       | 100    |                                           | Mascot |             |
| 2220.1545           | 2219.895    | -0.2595 | -117  | 163        | 180      | ALLELQLEPEELYQTFOR          |           |        |                                           | Mascot |             |
| 2233.1321           | 2232.873    | -0.2591 | -116  | 648        | 667      | KIWCFGDGTGPNLTDIT<br>K      |           |        | Carbamidomethyl (C)[4]                    | Mascot |             |
| 2327.0681           | 2326.7966   | -0.2715 | -117  | 367        | 386      | YRCellyEGPPDDEAAM<br>GIK    |           |        | Carbamidomethyl (C)[3]                    | Mascot |             |
| 2343.063            | 2342.7991   | -0.2639 | -113  | 367        | 386      | YRCellyEGPPDDEAAM<br>GIK    |           |        | Carbamidomethyl (C)[3], Oxidation (M)[17] | Mascot |             |
| 2498.1438           | 2497.9197   | -0.2241 | -90   | 677        | 698      | DSVVAQFWQATKEGALC<br>EENMR  |           |        | Carbamidomethyl (C)[17]                   | Mascot |             |
| 2576.3057           | 2576.0083   | -0.2974 | -115  | 121        | 144      | VTQDALVWCVDSGVCV<br>QTETVLR |           |        | Carbamidomethyl (C)[1,16]                 | Mascot |             |

|   |                                                  |              |       |      |    |     |     |     |     |
|---|--------------------------------------------------|--------------|-------|------|----|-----|-----|-----|-----|
| 6 | PREDICTED: elongation factor 2-like [Ailuropoda] | gi 301786208 | 95233 | 6.51 | 21 | 650 | 100 | 519 | 100 |
|---|--------------------------------------------------|--------------|-------|------|----|-----|-----|-----|-----|

| Peptide Information |             |         |       |            |          |              |           |         |              | Rank | Result | Type   |
|---------------------|-------------|---------|-------|------------|----------|--------------|-----------|---------|--------------|------|--------|--------|
| Calc. Mass          | Obsrv. Mass | ± da    | ± ppm | Start Seq. | End Seq. | Sequence     | Ion Score | C. I. % | Modification |      |        |        |
| 890.4578            | 890.4021    | -0.0557 | -63   | 276        | 284      | SATSPDGKK    |           |         |              |      |        | Mascot |
| 969.5475            | 969.4302    | -0.1173 | -121  | 717        | 726      | GGGQIPPTAR   |           |         |              |      |        | Mascot |
| 1013.501            | 1013.3802   | -0.1208 | -119  | 240        | 249      | GGGQLGPAER   |           |         |              |      |        | Mascot |
| 1091.5844           | 1091.4508   | -0.1336 | -122  | 2          | 10       | VNFTVDQIR    |           |         |              |      |        | Mascot |
| 1091.5844           | 1091.4508   | -0.1336 | -122  | 2          | 10       | VNFTVDQIR    | 53        | 98.373  |              |      |        | Mascot |
| 1107.6409           | 1107.4938   | -0.1471 | -133  | 416        | 426      | VFSLGVLSTGLK |           |         |              |      |        | Mascot |
| 1125.6487           | 1125.5104   | -0.1383 | -123  | 717        | 727      | GGGQIPPTARR  |           |         |              |      |        | Mascot |

|           |           |         |      |     |     |                              |     |                                          |        |
|-----------|-----------|---------|------|-----|-----|------------------------------|-----|------------------------------------------|--------|
|           | 1125.5104 |         |      |     |     |                              |     |                                          | Mascot |
| 1138.5164 | 1138.3916 | -0.1248 | -110 | 639 | 647 | YEWDAVEAR                    |     |                                          | Mascot |
| 1208.5034 | 1208.3651 | -0.1383 | -114 | 689 | 698 | EGALCEENMR                   |     |                                          | Mascot |
| 1224.4983 | 1224.3469 | -0.1514 | -124 | 689 | 698 | EGALCEENMR                   |     | Carbamidomethyl (C)[5], Oxidation (M)[9] | Mascot |
| 1274.7103 | 1274.5653 | -0.145  | -114 | 440 | 449 | EDLYRKPIQR                   |     |                                          | Mascot |
| 1378.7147 | 1378.5627 | -0.162  | -118 | 728 | 739 | CLYASVLTAPQR                 | 78  | 99.995                                   | Mascot |
| 1378.7147 | 1378.5528 | -0.162  | -118 | 728 | 739 | CLYASVLTAPQR                 |     |                                          | Mascot |
| 1402.8053 | 1402.6438 | -0.1615 | -115 | 439 | 449 | KEDLYLKPIQR                  |     |                                          | Mascot |
| 1430.7386 | 1430.5764 | -0.1622 | -113 | 236 | 249 | FAAKEGQLGPAPER               |     |                                          | Mascot |
| 1534.8158 | 1534.6367 | -0.1791 | -117 | 727 | 739 | RCLYASVLTAPR                 |     |                                          | Mascot |
| 1615.7645 | 1615.6001 | -0.1844 | -114 | 482 | 495 | TGTTTTFEHAHNMR               | 52  | 97.914                                   | Mascot |
| 1615.7645 | 1615.5801 | -0.1844 | -114 | 482 | 495 | TGTTTTFEHAHNMR               |     |                                          | Mascot |
| 1631.7595 | 1631.5674 | -0.1921 | -118 | 482 | 495 | TGTTTTFEHAHNMR               |     | Oxidation (M)[13]                        | Mascot |
| 1742.8384 | 1742.6367 | -0.2017 | -116 | 634 | 647 | YLAEKYEWDAVEAR               |     |                                          | Mascot |
| 1742.8384 | 1742.6367 | -0.2017 | -116 | 634 | 647 | YLAEKYEWDAVEAR               | 84  | 99.999                                   | Mascot |
| 1799.8992 | 1799.6888 | -0.207  | -115 | 786 | 801 | AFLPNESFGTDLR                |     |                                          | Mascot |
| 1799.8992 | 1799.6888 | -0.2074 | -115 | 786 | 801 | AFLPNESFGTDLR                | 117 | 100                                      | Mascot |
| 2143.0779 | 2142.834  | -0.2439 | -114 | 606 | 625 | ARPPFDGLAEDIKGEVS<br>AR      |     |                                          | Mascot |
| 2143.0779 | 2142.834  | -0.2439 | -114 | 606 | 625 | ARPPFDGLAEDIKGEVS<br>AR      | 31  | 0                                        | Mascot |
| 2220.1545 | 2219.895  | -0.2595 | -117 | 163 | 180 | ALLELQLEPEELYOTFOR           |     |                                          | Mascot |
| 2220.1545 | 2219.895  | -0.2595 | -117 | 163 | 180 | ALLELQLEPEELYOTFOR           | 104 | 100                                      | Mascot |
| 2327.0681 | 2326.7966 | -0.2715 | -117 | 367 | 386 | YRCellyEGPDDAEAM<br>GIK      |     |                                          | Mascot |
| 2343.063  | 2342.7991 | -0.2639 | -113 | 367 | 386 | YRCellyEGPDDAEAM<br>GIK      |     |                                          | Mascot |
| 2498.1438 | 2497.9197 | -0.2241 | -90  | 677 | 698 | D5VGAFQWATKEGALC<br>EEHNR    |     |                                          | Mascot |
| 2576.3057 | 2576.0083 | -0.2974 | -115 | 121 | 144 | VTDGALVVDVCVSGCV<br>ETFTVLIR |     |                                          | Mascot |

| 7 | Peptide Information |             |         |       |            |          | g[304505                    | 95262.9 | 6.41   | 19                                        | 632 |  | 100 | 519 | 100    |
|---|---------------------|-------------|---------|-------|------------|----------|-----------------------------|---------|--------|-------------------------------------------|-----|--|-----|-----|--------|
|   | Calc. Mass          | Obsrv. Mass | ± da    | ± ppm | Start Seq. | End Seq. |                             |         |        |                                           |     |  |     |     |        |
|   | 890.5093            | 890.4021    | -0.1072 | -120  | 499        | 506      | FSVSPVVR                    |         |        |                                           |     |  |     |     | Mascot |
|   | 969.5475            | 969.4302    | -0.1173 | -121  | 717        | 726      | GGGQIPTAR                   |         |        |                                           |     |  |     |     | Mascot |
|   | 1013.501            | 1013.3802   | -0.1208 | -119  | 240        | 249      | GEGQLGPAER                  |         |        |                                           |     |  |     |     | Mascot |
|   | 1091.5844           | 1091.4508   | -0.1336 | -122  | 2          | 10       | VNFTVDQIR                   |         |        |                                           |     |  |     |     | Mascot |
|   | 1091.5844           | 1091.4508   | -0.1336 | -122  | 2          | 10       | VNFTVDQIR                   | 53      | 98.373 |                                           |     |  |     |     | Mascot |
|   | 1125.6497           | 1125.5104   | -0.1383 | -123  | 727        | 737      | GGGQIPTAARR                 |         |        |                                           |     |  |     |     | Mascot |
|   | 1138.5164           | 1138.3916   | -0.1248 | -110  | 639        | 647      | YEWDAVEAR                   |         |        |                                           |     |  |     |     | Mascot |
|   | 1208.5034           | 1208.3651   | -0.1383 | -114  | 689        | 698      | EGALCEENMR                  |         |        | Carbamidomethyl (C)[5]                    |     |  |     |     | Mascot |
|   | 1224.4983           | 1224.3469   | -0.1514 | -124  | 689        | 698      | EGALCEENMR                  |         |        | Carbamidomethyl (C)[5], Oxidation (M)[9]  |     |  |     |     | Mascot |
|   | 1378.7147           | 1378.5527   | -0.162  | -118  | 728        | 739      | CLYASVLTAQPR                | 78      | 99.995 | Carbamidomethyl (C)[1]                    |     |  |     |     | Mascot |
|   | 1378.7147           | 1378.5527   | -0.162  | -118  | 728        | 739      | CLYASVLTAQPR                |         |        | Carbamidomethyl (C)[1]                    |     |  |     |     | Mascot |
|   | 1430.7386           | 1430.5764   | -0.1622 | -113  | 236        | 249      | FAKGEGLGPAER                |         |        |                                           |     |  |     |     | Mascot |
|   | 1534.8158           | 1534.6367   | -0.1791 | -117  | 727        | 739      | RCLVASLTAQPSR               |         |        | Carbamidomethyl (C)[2]                    |     |  |     |     | Mascot |
|   | 1615.7645           | 1615.6001   | -0.1844 | -114  | 482        | 495      | TGITTFTEHAHNMR              | 52      | 97.914 |                                           |     |  |     |     | Mascot |
|   | 1615.7645           | 1615.5801   | -0.1844 | -114  | 482        | 495      | TGITTFTEHAHNMR              |         |        |                                           |     |  |     |     | Mascot |
|   | 1631.7595           | 1631.5674   | -0.1921 | -118  | 482        | 495      | TGITTFTEHAHNMR              |         |        | Oxidation (M)[13]                         |     |  |     |     | Mascot |
|   | 1742.8384           | 1742.6367   | -0.2017 | -116  | 634        | 647      | YLAEKYEWDVAEAR              |         |        |                                           |     |  |     |     | Mascot |
|   | 1742.8384           | 1742.6367   | -0.2017 | -116  | 634        | 647      | YLAEKYEWDVAEAR              | 84      | 99.999 |                                           |     |  |     |     | Mascot |
|   | 1799.8962           | 1799.6988   | -0.2074 | -115  | 786        | 801      | AVLPYNESFGTADLR             |         |        |                                           |     |  |     |     | Mascot |
|   | 1799.8962           | 1799.6988   | -0.2074 | -115  | 786        | 801      | AVLPYNESFGTADLR             | 117     | 100    |                                           |     |  |     |     | Mascot |
|   | 2143.0779           | 2142.834    | -0.2439 | -114  | 606        | 625      | ARPPDGLAEDIDKGEVS<br>AR     |         |        |                                           |     |  |     |     | Mascot |
|   | 2143.0779           | 2142.834    | -0.2439 | -114  | 606        | 625      | ARPPDGLAEDIDKGEVS<br>AR     | 31      | 0      |                                           |     |  |     |     | Mascot |
|   | 2220.1545           | 2219.895    | -0.2595 | -117  | 163        | 180      | ALLELQLEPEELYQTFFOR         |         |        |                                           |     |  |     |     | Mascot |
|   | 2220.1545           | 2219.895    | -0.2595 | -117  | 163        | 180      | ALLELQLEPEELYQTFFOR         | 104     | 100    |                                           |     |  |     |     | Mascot |
|   | 2233.1321           | 2232.873    | -0.2591 | -116  | 648        | 667      | KIWCFGDGDTGNILTDIT<br>K     |         |        | Carbamidomethyl (C)[4]                    |     |  |     |     | Mascot |
|   | 2327.0681           | 2326.7966   | -0.2715 | -117  | 367        | 386      | YRCELLYEGPPDDEAAM<br>GIK    |         |        | Carbamidomethyl (C)[3]                    |     |  |     |     | Mascot |
|   | 2343.063            | 2342.7991   | -0.2639 | -113  | 367        | 386      | YRCELLYEGPPDDEAAM<br>GIK    |         |        | Carbamidomethyl (C)[3], Oxidation (M)[17] |     |  |     |     | Mascot |
|   | 2498.1438           | 2497.9197   | -0.2241 | -90   | 677        | 698      | DSVYAGFOWATKEGALC<br>ENNMR  |         |        | Carbamidomethyl (C)[17]                   |     |  |     |     | Mascot |
|   | 2576.3057           | 2576.0083   | -0.2974 | -115  | 121        | 144      | VTDGALVVDCVSGVCV<br>QTETVLR |         |        | Carbamidomethyl (C)[11,16]                |     |  |     |     | Mascot |

| elongation factor 2 [ <i>Cricetus cricetus</i> ] |             |         |       |            |          | gll387049                   |           | 95334.9 |                                           | 6.31 |        | 19     |  | 628 |  | 100 |  | 519 |  | 100 |  |
|--------------------------------------------------|-------------|---------|-------|------------|----------|-----------------------------|-----------|---------|-------------------------------------------|------|--------|--------|--|-----|--|-----|--|-----|--|-----|--|
| Peptide Information                              |             |         |       |            |          |                             |           |         |                                           |      |        |        |  |     |  |     |  |     |  |     |  |
| Calc. Mass                                       | Obsrv. Mass | ± da    | ± ppm | Start Seq. | End Seq. | Sequence                    | Ion Score | C. I. % | Modification                              | Rank | Result | Type   |  |     |  |     |  |     |  |     |  |
| 890.5093                                         | 890.4021    | -0.1072 | -120  | 499        | 506      | FSVSPVVR                    |           |         |                                           |      |        | Mascot |  |     |  |     |  |     |  |     |  |
| 1013.501                                         | 1013.3802   | -0.1208 | -119  | 240        | 249      | GEGQLGPAER                  |           |         |                                           |      |        | Mascot |  |     |  |     |  |     |  |     |  |
| 1091.5844                                        | 1091.4508   | -0.1336 | -122  | 2          | 10       | VNFTVDQIR                   |           |         |                                           |      |        | Mascot |  |     |  |     |  |     |  |     |  |
| 1091.5844                                        | 1091.4508   | -0.1336 | -122  | 2          | 10       | VNFTVDQIR                   | 53        | 98.373  |                                           |      |        | Mascot |  |     |  |     |  |     |  |     |  |
| 1138.5164                                        | 1138.3916   | -0.1248 | -110  | 639        | 647      | YEWVDVAEAR                  |           |         |                                           |      |        | Mascot |  |     |  |     |  |     |  |     |  |
| 1208.5034                                        | 1208.3651   | -0.1383 | -114  | 689        | 698      | EGALCEENMR                  |           |         | Carbamidomethyl (C)[5]                    |      |        | Mascot |  |     |  |     |  |     |  |     |  |
| 1224.4983                                        | 1224.3469   | -0.1514 | -124  | 689        | 698      | EGALCEENMR                  |           |         | Carbamidomethyl (C)[5], Oxidation (M)[9]  |      |        | Mascot |  |     |  |     |  |     |  |     |  |
| 1274.7103                                        | 1274.5653   | -0.145  | -114  | 440        | 449      | EDLYLKPIQR                  |           |         |                                           |      |        | Mascot |  |     |  |     |  |     |  |     |  |
| 1378.7147                                        | 1378.5527   | -0.162  | -118  | 728        | 739      | CLYASVLTQAPR                | 78        | 99.995  | Carbamidomethyl (C)[1]                    |      |        | Mascot |  |     |  |     |  |     |  |     |  |
| 1378.7147                                        | 1378.5527   | -0.162  | -118  | 728        | 739      | CLYASVLTQAPR                |           |         | Carbamidomethyl (C)[1]                    |      |        | Mascot |  |     |  |     |  |     |  |     |  |
| 1402.9053                                        | 1402.6438   | -0.1615 | -115  | 439        | 449      | KEDLYLKPIQR                 |           |         |                                           |      |        | Mascot |  |     |  |     |  |     |  |     |  |
| 1430.7385                                        | 1430.5754   | -0.1622 | -113  | 236        | 249      | FAKGEQGLGPAER               |           |         |                                           |      |        | Mascot |  |     |  |     |  |     |  |     |  |
| 1534.8158                                        | 1534.6367   | -0.1791 | -117  | 727        | 739      | RCLYASVLTQAPR               |           |         | Carbamidomethyl (C)[2]                    |      |        | Mascot |  |     |  |     |  |     |  |     |  |
| 1615.7645                                        | 1615.5801   | -0.1844 | -114  | 482        | 495      | TGTTTFEHAHNMR               | 52        | 97.914  |                                           |      |        | Mascot |  |     |  |     |  |     |  |     |  |
| 1615.7645                                        | 1615.5801   | -0.1844 | -114  | 482        | 495      | TGTTTFEHAHNMR               |           |         |                                           |      |        | Mascot |  |     |  |     |  |     |  |     |  |
| 1631.7595                                        | 1631.5674   | -0.1921 | -118  | 482        | 495      | TGTTTFEHAHNMR               |           |         | Oxidation (M)[13]                         |      |        | Mascot |  |     |  |     |  |     |  |     |  |
| 1742.8384                                        | 1742.6367   | -0.2017 | -116  | 634        | 647      | YLAEKYEWVDVAEAR             |           |         |                                           |      |        | Mascot |  |     |  |     |  |     |  |     |  |
| 1742.8384                                        | 1742.6367   | -0.2017 | -116  | 634        | 647      | YLAEKYEWVDVAEAR             | 84        | 99.999  |                                           |      |        | Mascot |  |     |  |     |  |     |  |     |  |
| 1799.8992                                        | 1799.6988   | -0.2074 | -115  | 786        | 801      | AYLPVNESFGFTADLR            |           |         |                                           |      |        | Mascot |  |     |  |     |  |     |  |     |  |
| 1799.8992                                        | 1799.6988   | -0.2074 | -115  | 786        | 801      | AYLPVNESFGFTADLR            | 117       | 100     |                                           |      |        | Mascot |  |     |  |     |  |     |  |     |  |
| 2143.0779                                        | 2142.834    | -0.2439 | -114  | 606        | 625      | ARPPFDGLAEDIDKGEVS<br>AR    |           |         |                                           |      |        | Mascot |  |     |  |     |  |     |  |     |  |
| 2143.0779                                        | 2142.834    | -0.2439 | -114  | 606        | 625      | ARPPFDGLAEDIDKGEVS<br>AR    | 31        | 0       |                                           |      |        | Mascot |  |     |  |     |  |     |  |     |  |
| 2220.1545                                        | 2219.895    | -0.2595 | -117  | 163        | 180      | ALLELQLEPEELYQTQFOR         | 104       | 100     |                                           |      |        | Mascot |  |     |  |     |  |     |  |     |  |
| 2220.1545                                        | 2219.895    | -0.2595 | -117  | 163        | 180      | ALLELQLEPEELYQTQFOR         |           |         |                                           |      |        | Mascot |  |     |  |     |  |     |  |     |  |
| 2233.1321                                        | 2232.873    | -0.2591 | -116  | 648        | 667      | KIWCFGPDGTGNILTDIT<br>K     |           |         | Carbamidomethyl (C)[4]                    |      |        | Mascot |  |     |  |     |  |     |  |     |  |
| 2327.0681                                        | 2326.7966   | -0.2715 | -117  | 367        | 386      | YRCELLYEGPPDDEAAM<br>GIK    |           |         | Carbamidomethyl (C)[3]                    |      |        | Mascot |  |     |  |     |  |     |  |     |  |
| 2343.063                                         | 2342.7991   | -0.2639 | -113  | 367        | 386      | YRCELLYEGPPDDEAAM<br>GIK    |           |         | Carbamidomethyl (C)[3], Oxidation (M)[17] |      |        | Mascot |  |     |  |     |  |     |  |     |  |
| 2498.1438                                        | 2497.9197   | -0.2241 | -90   | 677        | 698      | DSVAGVQWATKEGALC<br>EENMR   |           |         | Carbamidomethyl (C)[17]                   |      |        | Mascot |  |     |  |     |  |     |  |     |  |
| 2576.3057                                        | 2576.0083   | -0.2974 | -115  | 121        | 144      | VTDGALVVDCVSGVCV<br>QTETVLR |           |         | Carbamidomethyl (C)[11,16]                |      |        | Mascot |  |     |  |     |  |     |  |     |  |

| elongation factor 2 [Rattus norvegicus] |             |         |       |            |          |             | gI8393296 | 95222.9 | 6.41                   | 19   | 627    | 100    | 519 | 100 |
|-----------------------------------------|-------------|---------|-------|------------|----------|-------------|-----------|---------|------------------------|------|--------|--------|-----|-----|
| Peptide Information                     |             |         |       |            |          |             |           |         |                        |      |        |        |     |     |
| Calc. Mass                              | Obsrv. Mass | ± da    | ± ppm | Start Seq. | End Seq. | Sequence    | Ion Score | C. I. % | Modification           | Rank | Result | Type   |     |     |
| 890.5093                                | 890.4021    | -0.1072 | -120  | 499        | 506      | FSVSPVVR    |           |         |                        |      |        | Mascot |     |     |
| 969.5475                                | 969.4302    | -0.1173 | -121  | 717        | 726      | GGGQIIPTAR  |           |         |                        |      |        | Mascot |     |     |
| 1091.5844                               | 1091.4508   | -0.1336 | -122  | 2          | 10       | VNFIVDQIR   |           |         |                        |      |        | Mascot |     |     |
| 1091.5844                               | 1091.4608   | -0.1336 | -122  | 2          | 10       | VNFIVDQIR   | 53        | 98.373  |                        |      |        | Mascot |     |     |
| 1125.6487                               | 1125.5104   | -0.1383 | -123  | 717        | 727      | GGGQIIPTARR |           |         |                        |      |        | Mascot |     |     |
| 1138.5164                               | 1138.3916   | -0.1248 | -110  | 639        | 647      | YEWDAVEAR   |           |         |                        |      |        | Mascot |     |     |
| 1208.5034                               | 1208.3651   | -0.1383 | -114  | 689        | 698      | EGALCEENMR  |           |         | Carbamidomethyl (C)[5] |      |        | Mascot |     |     |

|           |           |         |      |     |     |                             |     |        |                                           |        |
|-----------|-----------|---------|------|-----|-----|-----------------------------|-----|--------|-------------------------------------------|--------|
| 1224.4983 | 1224.3469 | -0.1514 | -124 | 689 | 698 | EGALCEENMR                  |     |        | Carbamidomethyl (C)[5], Oxidation (M)[9]  | Mascot |
| 1274.7103 | 1274.5653 | -0.145  | -114 | 440 | 449 | EDLYLKPIQR                  |     |        |                                           | Mascot |
| 1378.7147 | 1378.5527 | -0.162  | -118 | 728 | 739 | CLYASVLTQAPR                | 78  | 99.995 | Carbamidomethyl (C)[1]                    | Mascot |
| 1378.7147 | 1378.5527 | -0.162  | -118 | 728 | 739 | CLYASVLTQAPR                |     |        | Carbamidomethyl (C)[1]                    | Mascot |
| 1402.8053 | 1402.6438 | -0.1615 | -115 | 439 | 449 | KEDLYLKPIQR                 |     |        |                                           | Mascot |
| 1534.8158 | 1534.6367 | -0.1791 | -117 | 727 | 739 | RCLYASVLTQAPR               |     |        | Carbamidomethyl (C)[2]                    | Mascot |
| 1615.7645 | 1615.5801 | -0.1844 | -114 | 482 | 495 | TGTTTTFEHAHNMR              | 52  | 97.914 |                                           | Mascot |
| 1615.7645 | 1615.5801 | -0.1844 | -114 | 482 | 495 | TGTTTTFEHAHNMR              |     |        |                                           | Mascot |
| 1631.7595 | 1631.5674 | -0.1921 | -118 | 482 | 495 | TGTTTTFEHAHNMR              |     |        | Oxidation (M)[13]                         | Mascot |
| 1742.8384 | 1742.6367 | -0.2017 | -116 | 634 | 647 | YLAEKYWDVAEAR               |     |        |                                           | Mascot |
| 1742.8384 | 1742.6367 | -0.2017 | -116 | 634 | 647 | YLAEKYWDVAEAR               | 84  | 99.999 |                                           | Mascot |
| 1799.8962 | 1799.6888 | -0.2074 | -115 | 786 | 801 | AYLPVNESFGFTADLR            |     |        |                                           | Mascot |
| 1799.8962 | 1799.6888 | -0.2074 | -115 | 786 | 801 | AYLPVNESFGFTADLR            | 117 | 100    |                                           | Mascot |
| 2143.0779 | 2142.834  | -0.2439 | -114 | 606 | 625 | ARPPFDGLAEDIDKGEVS<br>AR    |     |        |                                           | Mascot |
| 2143.0779 | 2142.834  | -0.2439 | -114 | 606 | 625 | ARPPFDGLAEDIDKGEVS<br>AR    | 31  | 0      |                                           | Mascot |
| 2220.1545 | 2219.895  | -0.2595 | -117 | 163 | 180 | ALLELQLEPEELYQTFQR          | 104 | 100    |                                           | Mascot |
| 2220.1545 | 2219.895  | -0.2595 | -117 | 163 | 180 | ALLELQLEPEELYQTFQR          |     |        |                                           | Mascot |
| 2233.1321 | 2232.873  | -0.2591 | -116 | 648 | 667 | KIWCFGPDGTGPNILTDIT<br>K    |     |        | Carbamidomethyl (C)[4]                    | Mascot |
| 2327.0681 | 2326.7966 | -0.2715 | -117 | 367 | 386 | YRCellyEGPPDDEAAM<br>GIK    |     |        | Carbamidomethyl (C)[3]                    | Mascot |
| 2343.063  | 2342.7991 | -0.2639 | -113 | 367 | 386 | YRCellyEGPPDDEAAM<br>GIK    |     |        | Carbamidomethyl (C)[3], Oxidation (M)[17] | Mascot |
| 2498.1438 | 2497.9197 | -0.2241 | -90  | 677 | 698 | DSVAGFQWATKEGALC<br>EENMR   |     |        | Carbamidomethyl (C)[17]                   | Mascot |
| 2576.3057 | 2576.0083 | -0.2974 | -115 | 121 | 144 | VTDGALVVDCVSGVCV<br>QTETVLR |     |        | Carbamidomethyl (C)[11,16]                | Mascot |

10 unnamed protein product [Mus musculus] 95261.8 6.38 19 626 100 519 100

| Peptide Information |             |         |       |            |          | Ion Score                   | C. I. % | Modification | Rank                                      | Result Type |
|---------------------|-------------|---------|-------|------------|----------|-----------------------------|---------|--------------|-------------------------------------------|-------------|
| Calc. Mass          | Obsrv. Mass | ± da    | ± ppm | Start Seq. | End Seq. |                             |         |              |                                           |             |
| 890.5093            | 890.4021    | -0.1072 | -120  | 499        | 506      | FSVSPVVR                    |         |              |                                           | Mascot      |
| 969.5475            | 969.4302    | -0.1173 | -121  | 717        | 726      | GGGQIPTAR                   |         |              |                                           | Mascot      |
| 1091.5844           | 1091.4508   | -0.1336 | -122  | 2          | 10       | VNFTVDQIR                   |         |              |                                           | Mascot      |
| 1091.5844           | 1091.4508   | -0.1336 | -122  | 2          | 10       | VNFTVDQIR                   | 53      | 98.373       |                                           | Mascot      |
| 1125.6487           | 1125.5104   | -0.1383 | -123  | 717        | 727      | GGGQIPTARR                  |         |              |                                           | Mascot      |
| 1138.5164           | 1138.3916   | -0.1248 | -110  | 639        | 647      | YEWDVAEAR                   |         |              |                                           | Mascot      |
| 1208.5034           | 1208.3651   | -0.1383 | -114  | 689        | 698      | EGALCEENMR                  |         |              | Carbamidomethyl (C)[5]                    | Mascot      |
| 1224.4983           | 1224.3469   | -0.1514 | -124  | 689        | 698      | EGALCEENMR                  |         |              | Carbamidomethyl (C)[5], Oxidation (M)[9]  | Mascot      |
| 1274.7103           | 1274.5653   | -0.145  | -114  | 440        | 449      | EDLYLKPIQR                  |         |              |                                           | Mascot      |
| 1378.7147           | 1378.5527   | -0.162  | -118  | 728        | 739      | CLYASVLTQAPR                | 78      | 99.995       | Carbamidomethyl (C)[1]                    | Mascot      |
| 1378.7147           | 1378.5527   | -0.162  | -118  | 728        | 739      | CLYASVLTQAPR                |         |              | Carbamidomethyl (C)[1]                    | Mascot      |
| 1402.8053           | 1402.6438   | -0.1615 | -115  | 439        | 449      | KEDLYLKPIQR                 |         |              |                                           | Mascot      |
| 1534.8158           | 1534.6367   | -0.1791 | -117  | 727        | 739      | RCLYASVLTQAPR               |         |              | Carbamidomethyl (C)[2]                    | Mascot      |
| 1615.7645           | 1615.5801   | -0.1844 | -114  | 482        | 495      | TGTTTTFEHAHNMR              | 52      | 97.272       |                                           | Mascot      |
| 1615.7645           | 1615.5801   | -0.1844 | -114  | 482        | 495      | TGTTTTFEHAHNMR              |         |              |                                           | Mascot      |
| 1631.7595           | 1631.5674   | -0.1921 | -118  | 482        | 495      | TGTTTTFEHAHNMR              |         |              | Oxidation (M)[13]                         | Mascot      |
| 1742.8384           | 1742.6367   | -0.2017 | -116  | 634        | 647      | YLAEKYWDVAEAR               |         |              |                                           | Mascot      |
| 1742.8384           | 1742.6367   | -0.2017 | -116  | 634        | 647      | YLAEKYWDVAEAR               | 84      | 99.998       |                                           | Mascot      |
| 1799.8962           | 1799.6888   | -0.2074 | -115  | 786        | 801      | AYLPVNESFGFTADLR            |         |              |                                           | Mascot      |
| 1799.8962           | 1799.6888   | -0.2074 | -115  | 786        | 801      | AYLPVNESFGFTADLR            | 117     | 100          |                                           | Mascot      |
| 2143.0779           | 2142.834    | -0.2439 | -114  | 606        | 625      | ARPPFDGLAEDIDKGEVS<br>AR    |         |              |                                           | Mascot      |
| 2143.0779           | 2142.834    | -0.2439 | -114  | 606        | 625      | ARPPFDGLAEDIDKGEVS<br>AR    | 31      | 0            |                                           | Mascot      |
| 2220.1545           | 2219.895    | -0.2595 | -117  | 163        | 180      | ALLELQLEPEELYQTFQR          | 104     | 100          |                                           | Mascot      |
| 2220.1545           | 2219.895    | -0.2595 | -117  | 163        | 180      | ALLELQLEPEELYQTFQR          |         |              |                                           | Mascot      |
| 2233.1321           | 2232.873    | -0.2591 | -116  | 648        | 667      | KIWCFGPDGTGPNILTDIT<br>K    |         |              | Carbamidomethyl (C)[4]                    | Mascot      |
| 2327.0681           | 2326.7966   | -0.2715 | -117  | 367        | 386      | YRCellyEGPPDDEAAM<br>GIK    |         |              | Carbamidomethyl (C)[3]                    | Mascot      |
| 2343.063            | 2342.7991   | -0.2639 | -113  | 367        | 386      | YRCellyEGPPDDEAAM<br>GIK    |         |              | Carbamidomethyl (C)[3], Oxidation (M)[17] | Mascot      |
| 2498.1438           | 2497.9197   | -0.2241 | -90   | 677        | 698      | DSVAGFQWATKEGALC<br>EENMR   |         |              | Carbamidomethyl (C)[17]                   | Mascot      |
| 2576.3057           | 2576.0083   | -0.2974 | -115  | 121        | 144      | VTDGALVVDCVSGVCV<br>QTETVLR |         |              | Carbamidomethyl (C)[11,16]                | Mascot      |

|               |              |          |                        |                |            |                  |               |                    |                 |                   |
|---------------|--------------|----------|------------------------|----------------|------------|------------------|---------------|--------------------|-----------------|-------------------|
| Gel Idx/Pos   |              | 16/A4    | Instr./Gel Origin      | AB4700/110211A |            | Process Status   |               | Analysis Succeeded |                 |                   |
| Plate #/ Name |              | [1] 8907 | Instrument Sample Name |                |            | Spectra          |               | 8                  |                 |                   |
| Rank          | Protein Name |          | Species                | Accession No.  | Protein MW | Protein PI Count | Protein Score | Protein Score      | Total Ion Score | Total Ion C. I. % |

1 elongation factor 2 [Bos taurus] 95307 6.41 27 823 100 577 100

| Peptide Information |             |         |       |            |          |                     | Ion Score              | C. I. % | Modification                              | Rank   | Result Type |        |
|---------------------|-------------|---------|-------|------------|----------|---------------------|------------------------|---------|-------------------------------------------|--------|-------------|--------|
| Calc. Mass          | Obsrv. Mass | ± da    | ± ppm | Start Seq. | End Seq. | Sequence            |                        |         |                                           |        |             |        |
| 890.5093            | 890.4191    | -0.0902 | -101  | 499        | 506      | FSVSPVVR            | 60                     | 99.607  |                                           | Mascot |             |        |
| 922.4628            | 922.3605    | -0.1023 | -111  | 573        | 580      | SDPVSVYR            |                        |         | Mascot                                    |        |             |        |
| 969.5475            | 969.4484    | -0.0991 | -102  | 717        | 726      | GGGQIIPTR           |                        |         | Mascot                                    |        |             |        |
| 1013.501            | 1013.3998   | -0.1012 | -100  | 240        | 249      | GEGQLGPAER          |                        |         | Mascot                                    |        |             |        |
| 1091.5844           | 1091.4723   | -0.1121 | -103  | 2          | 10       | VNFTVDQIR           |                        |         | Mascot                                    |        |             |        |
| 1091.5844           | 1091.4723   | -0.1121 | -103  | 2          | 10       | VNFTVDQIR           |                        |         | Mascot                                    |        |             |        |
| 1107.6409           | 1107.5142   | -0.1267 | -114  | 416        | 426      | VFGSLVSTGLK         |                        |         | Mascot                                    |        |             |        |
| 1138.5164           | 1138.4023   | -0.1141 | -100  | 639        | 647      | YEVDVAEAR           |                        |         | Mascot                                    |        |             |        |
| 1208.5034           | 1208.387    | -0.1164 | -96   | 689        | 698      | EGALCEENMR          |                        |         | Carbamidomethyl (C)[5]                    | Mascot |             |        |
| 1224.4983           | 1224.3759   | -0.1224 | -100  | 689        | 698      | EGALCEENMR          |                        |         | Carbamidomethyl (C)[5], Oxidation (M)[9]  | Mascot |             |        |
| 1274.7103           | 1274.5836   | -0.1267 | -99   | 440        | 449      | EDLYLKPIQR          | Mascot                 |         |                                           |        |             |        |
| 1378.7147           | 1378.5804   | -0.1343 | -97   | 728        | 739      | CLYASVLTQAPR        | 66                     | 99.883  | Carbamidomethyl (C)[1]                    | Mascot |             |        |
| 1378.7147           | 1378.5804   | -0.1343 | -97   | 728        | 739      | CLYASVLTQAPR        |                        |         | Carbamidomethyl (C)[1]                    | Mascot |             |        |
| 1402.8053           | 1402.6671   | -0.1382 | -99   | 439        | 449      | KEDLYLKPIQR         | Mascot                 |         |                                           |        |             |        |
| 1444.7682           | 1444.6219   | -0.1463 | -101  | 846        | 858      | EGIPALDNFLDKL       | Mascot                 |         |                                           |        |             |        |
| 1494.8025           | 1494.6416   | -0.1609 | -108  | 288        | 299      | TFCQLLDPIFK         | Carbamidomethyl (C)[3] | Mascot  |                                           |        |             |        |
| 1534.8158           | 1534.6658   | -0.15   | -98   | 727        | 739      | RCLYASVLTQAPR       | Carbamidomethyl (C)[2] | Mascot  |                                           |        |             |        |
| 1615.7645           | 1615.608    | -0.1565 | -97   | 482        | 495      | TGTTITFEAHNMR       | 64                     | 99.827  |                                           | Mascot |             |        |
| 1615.7645           | 1615.608    | -0.1565 | -97   | 482        | 495      | TGTTITFEAHNMR       |                        |         |                                           | Mascot |             |        |
| 1631.7595           | 1631.5951   | -0.1644 | -101  | 482        | 495      | TGTTITFEAHNMR       |                        |         | Oxidation (M)[13]                         | Mascot |             |        |
| 1742.8384           | 1742.6671   | -0.1713 | -98   | 634        | 647      | YLAEKYWDVAEAR       |                        |         | Mascot                                    |        |             |        |
| 1742.8384           | 1742.6671   | -0.1713 | -98   | 634        | 647      | YLAEKYWDVAEAR       | 114                    | 100     |                                           | Mascot |             |        |
| 1799.8962           | 1799.7196   | -0.1766 | -98   | 786        | 801      | AYLPVNESFGFTADLR    | 124                    | 100     |                                           | Mascot |             |        |
| 1799.8962           | 1799.7196   | -0.1766 | -98   | 786        | 801      | AYLPVNESFGFTADLR    |                        |         |                                           | Mascot |             |        |
| 1975.9946           | 1975.7948   | -0.1998 | -101  | 768        | 785      | GHVFETQVAGTPMFVV    |                        |         |                                           | Mascot |             |        |
|                     |             |         |       |            |          | K                   |                        |         |                                           |        |             |        |
| 2132.0957           | 2131.8884   | -0.2073 | -97   | 767        | 785      | RGHVFETQVAGTPMFV    |                        |         |                                           | Mascot |             |        |
|                     |             |         |       |            |          | VK                  |                        |         |                                           |        |             |        |
| 2143.0779           | 2142.8677   | -0.2102 | -98   | 606        | 625      | ARPPFDGLAEDIDKGEVS  | 50                     | 95.41   |                                           | Mascot |             |        |
|                     |             |         |       |            |          | AR                  |                        |         |                                           |        |             |        |
| 2143.0779           | 2142.8677   | -0.2102 | -98   | 606        | 625      | ARPPFDGLAEDIDKGEVS  |                        |         |                                           | Mascot |             |        |
|                     |             |         |       |            |          | AR                  |                        |         |                                           |        |             |        |
| 2220.1545           | 2219.9341   | -0.2204 | -99   | 163        | 180      | ALLELQLEPEELYQTFQR  | 100                    | 100     |                                           | Mascot |             |        |
| 2220.1545           | 2219.9341   | -0.2204 | -99   | 163        | 180      | ALLELQLEPEELYQTFQR  |                        |         |                                           |        |             | Mascot |
| 2233.1321           | 2232.9185   | -0.2136 | -96   | 648        | 667      | KIWCFGPDGTGPNILTDIT |                        |         | Carbamidomethyl (C)[4]                    | Mascot |             |        |
|                     |             |         |       |            |          | K                   |                        |         |                                           |        |             |        |
| 2327.0681           | 2326.842    | -0.2261 | -97   | 367        | 386      | YRCellyEGPPDDEAAM   |                        |         | Carbamidomethyl (C)[3]                    | Mascot |             |        |
|                     |             |         |       |            |          | GIK                 |                        |         |                                           |        |             |        |
| 2343.063            | 2342.8398   | -0.2232 | -95   | 367        | 386      | YRCellyEGPPDDEAAM   |                        |         | Carbamidomethyl (C)[3], Oxidation (M)[17] | Mascot |             |        |
|                     |             |         |       |            |          | GQIK                |                        |         |                                           |        |             |        |
| 2353.2185           | 2352.99     | -0.2285 | -97   | 668        | 688      | GVQYLNEIKDSVAGFQ    |                        |         |                                           | Mascot |             |        |
|                     |             |         |       |            |          | WATK                |                        |         |                                           |        |             |        |
| 2462.2629           | 2462.0879   | -0.175  | -71   | 121        | 144      | VTDGALVVDCVSGVCV    |                        |         |                                           | Mascot |             |        |

|           |           |         |      |     |     |                                        |                            |        |
|-----------|-----------|---------|------|-----|-----|----------------------------------------|----------------------------|--------|
| 2576.3057 | 2576.0515 | -0.2542 | -99  | 121 | 144 | QTETVLR<br>VTDGALVVDCVSGVCV<br>QTETVLR | Carbamidomethyl (C)[11,16] | Mascot |
| 2817.4053 | 2817.1223 | -0.283  | -100 | 94  | 120 | DGSGFLNLIDSPGHVDF<br>SSEVTAALR         |                            | Mascot |
| 2989.5525 | 2989.2532 | -0.2993 | -100 | 740 | 765 | LMEPIYLVEIQCEQVVG<br>GIYGVNLR          | Carbamidomethyl (C)[12]    | Mascot |

2 RecName: Full=Elongation factor 2; Short=EF-2  
Peptide Information g|298286925 95235.8 6.22 24 776 100 577 100

| Calc. Mass | Obsrv. Mass | ± da    | ± ppm | Start Seq. | End Seq. | Sequence                               | Ion Score | C. I. % | Modification                              | Rank | Result Type |
|------------|-------------|---------|-------|------------|----------|----------------------------------------|-----------|---------|-------------------------------------------|------|-------------|
| 890.5093   | 890.4191    | -0.0902 | -101  | 499        | 506      | FSVSPVVR                               |           |         |                                           |      | Mascot      |
| 922.4628   | 922.3605    | -0.1023 | -111  | 573        | 580      | SDPVVSYR                               |           |         |                                           |      | Mascot      |
| 969.5475   | 969.4484    | -0.0991 | -102  | 717        | 726      | GGGQIPTAR                              |           |         |                                           |      | Mascot      |
| 1013.501   | 1013.3998   | -0.1012 | -100  | 240        | 249      | GEGQLGPAER                             |           |         |                                           |      | Mascot      |
| 1091.5844  | 1091.4723   | -0.1121 | -103  | 2          | 10       | VNFTVDQIR                              |           |         |                                           |      | Mascot      |
| 1091.5844  | 1091.4723   | -0.1121 | -103  | 2          | 10       | VNFTVDQIR                              | 60        | 99.607  |                                           |      | Mascot      |
| 1138.5164  | 1138.4023   | -0.1141 | -100  | 639        | 647      | YEWDVAEAR                              |           |         |                                           |      | Mascot      |
| 1208.5034  | 1208.387    | -0.1164 | -96   | 689        | 698      | EGALCEENMR                             |           |         | Carbamidomethyl (C)[5]                    |      | Mascot      |
| 1224.4983  | 1224.3759   | -0.1224 | -100  | 689        | 698      | EGALCEENMR                             |           |         | Carbamidomethyl (C)[5], Oxidation (M)[9]  |      | Mascot      |
| 1274.7103  | 1274.5836   | -0.1267 | -99   | 440        | 449      | EDLYLKPIQR                             |           |         |                                           |      | Mascot      |
| 1378.7147  | 1378.5804   | -0.1343 | -97   | 728        | 739      | CLYASVLTAAQPR                          | 66        | 99.883  | Carbamidomethyl (C)[1]                    |      | Mascot      |
| 1378.7147  | 1378.5804   | -0.1343 | -97   | 728        | 739      | CLYASVLTAAQPR                          |           |         | Carbamidomethyl (C)[1]                    |      | Mascot      |
| 1402.8053  | 1402.6671   | -0.1382 | -99   | 439        | 449      | KEDLYLKPIQR                            |           |         |                                           |      | Mascot      |
| 1444.7682  | 1444.6219   | -0.1463 | -101  | 846        | 858      | EGIPALDNFLDKL                          |           |         |                                           |      | Mascot      |
| 1494.8025  | 1494.6416   | -0.1609 | -108  | 288        | 299      | TFQCILDPIFK                            |           |         | Carbamidomethyl (C)[3]                    |      | Mascot      |
| 1534.8158  | 1534.6658   | -0.15   | -98   | 727        | 739      | RCLYASVLTAAQPR                         |           |         | Carbamidomethyl (C)[2]                    |      | Mascot      |
| 1615.7645  | 1615.608    | -0.1565 | -97   | 482        | 495      | TGTTTTFEHAHNMR                         | 64        | 99.827  |                                           |      | Mascot      |
| 1615.7645  | 1615.608    | -0.1565 | -97   | 482        | 495      | TGTTTTFEHAHNMR                         |           |         |                                           |      | Mascot      |
| 1631.7595  | 1631.5951   | -0.1644 | -101  | 482        | 495      | TGTTTTFEHAHNMR                         |           |         | Oxidation (M)[13]                         |      | Mascot      |
| 1742.8384  | 1742.6671   | -0.1713 | -98   | 634        | 647      | YLAEKYWDVAEAR                          |           |         |                                           |      | Mascot      |
| 1742.8384  | 1742.6671   | -0.1713 | -98   | 634        | 647      | YLAEKYWDVAEAR                          | 114       | 100     |                                           |      | Mascot      |
| 1799.8962  | 1799.7196   | -0.1766 | -98   | 786        | 801      | AYLPVNESFGFTADLR                       | 124       | 100     |                                           |      | Mascot      |
| 1799.8962  | 1799.7196   | -0.1766 | -98   | 786        | 801      | AYLPVNESFGFTADLR                       |           |         |                                           |      | Mascot      |
| 2143.0779  | 2142.8677   | -0.2102 | -98   | 606        | 625      | ARPPDGLAEDIDKGEVS<br>AR                | 50        | 95.41   |                                           |      | Mascot      |
| 2143.0779  | 2142.8677   | -0.2102 | -98   | 606        | 625      | ARPPDGLAEDIDKGEVS<br>AR                |           |         |                                           |      | Mascot      |
| 2220.1545  | 2219.9341   | -0.2204 | -99   | 163        | 180      | ALLELQLEPEELYQTFQR                     |           |         |                                           |      | Mascot      |
| 2220.1545  | 2219.9341   | -0.2204 | -99   | 163        | 180      | ALLELQLEPEELYQTFQR                     | 100       | 100     |                                           |      | Mascot      |
| 2233.1321  | 2232.9185   | -0.2136 | -96   | 648        | 667      | KIWCFGPDGTGNILTDIT<br>K                |           |         | Carbamidomethyl (C)[4]                    |      | Mascot      |
| 2327.0681  | 2326.842    | -0.2261 | -97   | 367        | 386      | YRCELLYEGPPDDEAAM<br>GIK               |           |         | Carbamidomethyl (C)[3]                    |      | Mascot      |
| 2343.063   | 2342.8398   | -0.2232 | -95   | 367        | 386      | YRCELLYEGPPDDEAAM<br>GIK               |           |         | Carbamidomethyl (C)[3], Oxidation (M)[17] |      | Mascot      |
| 2353.2185  | 2352.99     | -0.2285 | -97   | 668        | 688      | GVQYVLEIKDSVVGAFQ<br>WATK              |           |         |                                           |      | Mascot      |
| 2462.2629  | 2462.0879   | -0.175  | -71   | 121        | 144      | VTDGALVVDCVSGVCV                       |           |         |                                           |      | Mascot      |
| 2462.2629  | 2462.0879   | -0.175  | -71   | 121        | 144      | VTDGALVVDCVSGVCV                       |           |         |                                           |      | Mascot      |
| 2576.3057  | 2576.0515   | -0.2542 | -99   | 121        | 144      | QTETVLR<br>VTDGALVVDCVSGVCV<br>QTETVLR |           |         | Carbamidomethyl (C)[11,16]                |      | Mascot      |
| 2817.4053  | 2817.1223   | -0.283  | -100  | 94         | 120      | DGSGFLNLIDSPGHVDF<br>SSEVTAALR         |           |         |                                           |      | Mascot      |
| 2989.5525  | 2989.2532   | -0.2993 | -100  | 740        | 765      | LMEPIYLVEIQCEQVVG<br>GIYGVNLR          |           |         | Carbamidomethyl (C)[12]                   |      | Mascot      |

3 PREDICTED: elongation factor 2-like [Ailuropoda melanoleuca]  
Peptide Information g|301786208 95233 6.51 24 775 100 577 100

| Calc. Mass | Obsrv. Mass | ± da    | ± ppm | Start Seq. | End Seq. | Sequence                               | Ion Score | C. I. % | Modification                              | Rank | Result Type |
|------------|-------------|---------|-------|------------|----------|----------------------------------------|-----------|---------|-------------------------------------------|------|-------------|
| 890.4578   | 890.4191    | -0.0387 | -43   | 276        | 284      | SATSPDGKK                              |           |         |                                           |      | Mascot      |
| 922.4628   | 922.3605    | -0.1023 | -111  | 573        | 580      | SDPVVSYR                               |           |         |                                           |      | Mascot      |
| 969.5475   | 969.4484    | -0.0991 | -102  | 717        | 726      | GGGQIPTAR                              |           |         |                                           |      | Mascot      |
| 1013.501   | 1013.3998   | -0.1012 | -100  | 240        | 249      | GEGQLGPAER                             |           |         |                                           |      | Mascot      |
| 1091.5844  | 1091.4723   | -0.1121 | -103  | 2          | 10       | VNFTVDQIR                              |           |         |                                           |      | Mascot      |
| 1091.5844  | 1091.4723   | -0.1121 | -103  | 2          | 10       | VNFTVDQIR                              | 60        | 99.607  |                                           |      | Mascot      |
| 1107.6409  | 1107.5142   | -0.1267 | -114  | 416        | 426      | VFSGLVSTGLK                            |           |         |                                           |      | Mascot      |
| 1138.5164  | 1138.4023   | -0.1141 | -100  | 639        | 647      | YEWDVAEAR                              |           |         |                                           |      | Mascot      |
| 1208.5034  | 1208.387    | -0.1164 | -96   | 689        | 698      | EGALCEENMR                             |           |         | Carbamidomethyl (C)[5]                    |      | Mascot      |
| 1224.4983  | 1224.3759   | -0.1224 | -100  | 689        | 698      | EGALCEENMR                             |           |         | Carbamidomethyl (C)[5], Oxidation (M)[9]  |      | Mascot      |
| 1274.7103  | 1274.5836   | -0.1267 | -99   | 440        | 449      | EDLYLKPIQR                             |           |         |                                           |      | Mascot      |
| 1378.7147  | 1378.5804   | -0.1343 | -97   | 728        | 739      | CLYASVLTAAQPR                          | 66        | 99.883  | Carbamidomethyl (C)[1]                    |      | Mascot      |
| 1378.7147  | 1378.5804   | -0.1343 | -97   | 728        | 739      | CLYASVLTAAQPR                          |           |         | Carbamidomethyl (C)[1]                    |      | Mascot      |
| 1402.8053  | 1402.6671   | -0.1382 | -99   | 439        | 449      | KEDLYLKPIQR                            |           |         |                                           |      | Mascot      |
| 1444.7682  | 1444.6219   | -0.1463 | -101  | 846        | 858      | EGIPALDNFLDKL                          |           |         |                                           |      | Mascot      |
| 1494.8025  | 1494.6416   | -0.1609 | -108  | 288        | 299      | TFQCILDPIFK                            |           |         | Carbamidomethyl (C)[3]                    |      | Mascot      |
| 1534.8158  | 1534.6658   | -0.15   | -98   | 727        | 739      | RCLYASVLTAAQPR                         |           |         | Carbamidomethyl (C)[2]                    |      | Mascot      |
| 1615.7645  | 1615.608    | -0.1565 | -97   | 482        | 495      | TGTTTTFEHAHNMR                         | 64        | 99.827  |                                           |      | Mascot      |
| 1615.7645  | 1615.608    | -0.1565 | -97   | 482        | 495      | TGTTTTFEHAHNMR                         |           |         |                                           |      | Mascot      |
| 1631.7595  | 1631.5951   | -0.1644 | -101  | 482        | 495      | TGTTTTFEHAHNMR                         |           |         | Oxidation (M)[13]                         |      | Mascot      |
| 1742.8384  | 1742.6671   | -0.1713 | -98   | 634        | 647      | YLAEKYWDVAEAR                          |           |         |                                           |      | Mascot      |
| 1742.8384  | 1742.6671   | -0.1713 | -98   | 634        | 647      | YLAEKYWDVAEAR                          | 114       | 100     |                                           |      | Mascot      |
| 1799.8962  | 1799.7196   | -0.1766 | -98   | 786        | 801      | AYLPVNESFGFTADLR                       | 124       | 100     |                                           |      | Mascot      |
| 1799.8962  | 1799.7196   | -0.1766 | -98   | 786        | 801      | AYLPVNESFGFTADLR                       |           |         |                                           |      | Mascot      |
| 2143.0779  | 2142.8677   | -0.2102 | -98   | 606        | 625      | ARPPDGLAEDIDKGEVS<br>AR                | 50        | 95.41   |                                           |      | Mascot      |
| 2143.0779  | 2142.8677   | -0.2102 | -98   | 606        | 625      | ARPPDGLAEDIDKGEVS<br>AR                |           |         |                                           |      | Mascot      |
| 2220.1545  | 2219.9341   | -0.2204 | -99   | 163        | 180      | ALLELQLEPEELYQTFQR                     |           |         |                                           |      | Mascot      |
| 2220.1545  | 2219.9341   | -0.2204 | -99   | 163        | 180      | ALLELQLEPEELYQTFQR                     | 100       | 100     |                                           |      | Mascot      |
| 2327.0681  | 2326.842    | -0.2261 | -97   | 367        | 386      | YRCELLYEGPPDDEAAM<br>GIK               |           |         | Carbamidomethyl (C)[3]                    |      | Mascot      |
| 2343.063   | 2342.8398   | -0.2232 | -95   | 367        | 386      | YRCELLYEGPPDDEAAM<br>GIK               |           |         | Carbamidomethyl (C)[3], Oxidation (M)[17] |      | Mascot      |
| 2353.2185  | 2352.99     | -0.2285 | -97   | 668        | 688      | GVQYVLEIKDSVVGAFQ<br>WATK              |           |         |                                           |      | Mascot      |
| 2462.2629  | 2462.0879   | -0.175  | -71   | 121        | 144      | VTDGALVVDCVSGVCV                       |           |         |                                           |      | Mascot      |
| 2576.3057  | 2576.0515   | -0.2542 | -99   | 121        | 144      | QTETVLR<br>VTDGALVVDCVSGVCV<br>QTETVLR |           |         | Carbamidomethyl (C)[11,16]                |      | Mascot      |
| 2817.4053  | 2817.1223   | -0.283  | -100  | 94         | 120      | DGSGFLNLIDSPGHVDF<br>SSEVTAALR         |           |         |                                           |      | Mascot      |
| 2989.5525  | 2989.2532   | -0.2993 | -100  | 740        | 765      | LMEPIYLVEIQCEQVVG<br>GIYGVNLR          |           |         | Carbamidomethyl (C)[12]                   |      | Mascot      |

4 elongation factor 2 [Pongo abelii]  
Peptide Information g|197099082 95248.9 6.41 24 774 100 577 100

| Calc. Mass | Obsrv. Mass | ± da    | ± ppm | Start Seq. | End Seq. | Sequence    | Ion Score | C. I. % | Modification                             | Rank | Result Type |
|------------|-------------|---------|-------|------------|----------|-------------|-----------|---------|------------------------------------------|------|-------------|
| 890.5093   | 890.4191    | -0.0902 | -101  | 499        | 506      | FSVSPVVR    |           |         |                                          |      | Mascot      |
| 922.4628   | 922.3605    | -0.1023 | -111  | 573        | 580      | SDPVVSYR    |           |         |                                          |      | Mascot      |
| 969.5475   | 969.4484    | -0.0991 | -102  | 717        | 726      | GGGQIPTAR   |           |         |                                          |      | Mascot      |
| 1013.501   | 1013.3998   | -0.1012 | -100  | 240        | 249      | GEGQLGPAER  |           |         |                                          |      | Mascot      |
| 1091.5844  | 1091.4723   | -0.1121 | -103  | 2          | 10       | VNFTVDQIR   |           |         |                                          |      | Mascot      |
| 1091.5844  | 1091.4723   | -0.1121 | -103  | 2          | 10       | VNFTVDQIR   | 60        | 99.607  |                                          |      | Mascot      |
| 1107.6409  | 1107.5142   | -0.1267 | -114  | 416        | 426      | VFSGLVSTGLK |           |         |                                          |      | Mascot      |
| 1138.5164  | 1138.4023   | -0.1141 | -100  | 639        | 647      | YEWDVAEAR   |           |         |                                          |      | Mascot      |
| 1208.5034  | 1208.387    | -0.1164 | -96   | 689        | 698      | EGALCEENMR  |           |         | Carbamidomethyl (C)[5]                   |      | Mascot      |
| 1224.4983  | 1224.3759   | -0.1224 | -100  | 689        | 698      | EGALCEENMR  |           |         | Carbamidomethyl (C)[5], Oxidation (M)[9] |      | Mascot      |
| 1274.7103  | 1274.5836   | -0.1267 | -99   | 440        | 449      | EDLYLKPIQR  |           |         |                                          |      | Mascot      |

|           |           |         |      |     |     |                             |  |     |        |                                           |        |
|-----------|-----------|---------|------|-----|-----|-----------------------------|--|-----|--------|-------------------------------------------|--------|
| 1378.7147 | 1378.5804 | -0.1343 | -97  | 728 | 739 | CLYASVLT AQPR               |  | 66  | 99.883 | Carbamidomethyl (C)[1]                    | Mascot |
| 1378.7147 | 1378.5804 | -0.1343 | -97  | 728 | 739 | CLYASVLT AQPR               |  |     |        | Carbamidomethyl (C)[1]                    | Mascot |
| 1402.8053 | 1402.6671 | -0.1382 | -99  | 439 | 449 | KEDLYLKPIQR                 |  |     |        |                                           | Mascot |
| 1444.7682 | 1444.6219 | -0.1463 | -101 | 846 | 858 | EGIPALDNFLDKL               |  |     |        |                                           | Mascot |
| 1494.8025 | 1494.6416 | -0.1609 | -108 | 288 | 299 | TFQCILDPIFK                 |  |     |        | Carbamidomethyl (C)[3]                    | Mascot |
| 1534.8158 | 1534.6658 | -0.15   | -98  | 727 | 739 | RCLYASVLT AQPR              |  |     |        | Carbamidomethyl (C)[2]                    | Mascot |
| 1615.7645 | 1615.608  | -0.1565 | -97  | 482 | 495 | TGTTTTFEHAHNMR              |  | 64  | 99.827 |                                           | Mascot |
| 1615.7645 | 1615.608  | -0.1565 | -97  | 482 | 495 | TGTTTTFEHAHNMR              |  |     |        |                                           | Mascot |
| 1631.7595 | 1631.5951 | -0.1644 | -101 | 482 | 495 | TGTTTTFEHAHNMR              |  |     |        | Oxidation (M)[13]                         | Mascot |
| 1742.8384 | 1742.6671 | -0.1713 | -98  | 634 | 647 | YLAKEYWDVAEAR               |  |     |        |                                           | Mascot |
| 1742.8384 | 1742.6671 | -0.1713 | -98  | 634 | 647 | YLAKEYWDVAEAR               |  | 114 | 100    |                                           | Mascot |
| 1799.8962 | 1799.7196 | -0.1766 | -98  | 786 | 801 | AYLPVNESFGFTADLR            |  | 124 | 100    |                                           | Mascot |
| 1799.8962 | 1799.7196 | -0.1766 | -98  | 786 | 801 | AYLPVNESFGFTADLR            |  |     |        |                                           | Mascot |
| 2143.0779 | 2142.8677 | -0.2102 | -98  | 606 | 625 | ARPPFDGLAEDIDKGEVS AR       |  | 50  | 95.41  |                                           | Mascot |
| 2143.0779 | 2142.8677 | -0.2102 | -98  | 606 | 625 | ARPPFDGLAEDIDKGEVS AR       |  |     |        |                                           | Mascot |
| 2220.1545 | 2219.9341 | -0.2204 | -99  | 163 | 180 | ALLELQLEPEELYQTQFOR         |  |     |        |                                           | Mascot |
| 2220.1545 | 2219.9341 | -0.2204 | -99  | 163 | 180 | ALLELQLEPEELYQTQFOR         |  | 100 | 100    |                                           | Mascot |
| 2233.1321 | 2232.9185 | -0.2136 | -96  | 648 | 667 | KIWCFGPDGTGPNILTDIT K       |  |     |        | Carbamidomethyl (C)[4]                    | Mascot |
| 2327.0681 | 2326.842  | -0.2261 | -97  | 367 | 386 | YRCELLYEGPPDDEAAM GIK       |  |     |        | Carbamidomethyl (C)[3]                    | Mascot |
| 2343.063  | 2342.8398 | -0.2232 | -95  | 367 | 386 | YRCELLYEGPPDDEAAM GIK       |  |     |        | Carbamidomethyl (C)[3], Oxidation (M)[17] | Mascot |
| 2353.2185 | 2352.99   | -0.2285 | -97  | 668 | 688 | GVQYLNEIKDSVVAGFQ WATK      |  |     |        |                                           | Mascot |
| 2462.2629 | 2462.0879 | -0.175  | -71  | 121 | 144 | VTDGALVVDCVSGVCV QTETVLR    |  |     |        |                                           | Mascot |
| 2576.3057 | 2576.0515 | -0.2542 | -99  | 121 | 144 | VTDGALVVDCVSGVCV QTETVLR    |  |     |        | Carbamidomethyl (C)[11,16]                | Mascot |
| 2989.5525 | 2989.2532 | -0.2993 | -100 | 740 | 765 | LMEPIYLVIEQCPEQVVG GIYGVNLR |  |     |        | Carbamidomethyl (C)[12]                   | Mascot |

5 PREDICTED: elongation factor 2 [Macaca mulatta] g|297275803 95262.9 6.41 24 773 100 577 100

| Peptide Information |             |         |       |            |          |                             |           |         |                                           |                        | Rank | Result Type |
|---------------------|-------------|---------|-------|------------|----------|-----------------------------|-----------|---------|-------------------------------------------|------------------------|------|-------------|
| Calc. Mass          | Obsrv. Mass | ± da    | ± ppm | Start Seq. | End Seq. | Sequence                    | Ion Score | C. I. % | Modification                              |                        |      |             |
| 890.4578            | 890.4191    | -0.0387 | -43   | 276        | 284      | SATSPDGKK                   |           |         |                                           |                        |      | Mascot      |
| 922.4628            | 922.3605    | -0.1023 | -111  | 573        | 580      | SDPVVSYR                    |           |         |                                           |                        |      | Mascot      |
| 969.5475            | 969.4484    | -0.0991 | -102  | 717        | 726      | GGGQIPTAR                   |           |         |                                           |                        |      | Mascot      |
| 1013.501            | 1013.3998   | -0.1012 | -100  | 240        | 249      | GEGQLGPAER                  |           |         |                                           |                        |      | Mascot      |
| 1091.5844           | 1091.4723   | -0.1121 | -103  | 2          | 10       | VNFTVDQIR                   |           |         |                                           |                        |      | Mascot      |
| 1091.5844           | 1091.4723   | -0.1121 | -103  | 2          | 10       | VNFTVDQIR                   | 60        | 99.607  |                                           |                        |      | Mascot      |
| 1107.6409           | 1107.5142   | -0.1267 | -114  | 416        | 426      | VFSGLVSTGLK                 |           |         |                                           |                        |      | Mascot      |
| 1138.5164           | 1138.4023   | -0.1141 | -100  | 639        | 647      | YEWVDVAEAR                  |           |         |                                           |                        |      | Mascot      |
| 1208.5034           | 1208.387    | -0.1164 | -96   | 689        | 698      | EGALCEENMR                  |           |         | Carbamidomethyl (C)[5]                    |                        |      | Mascot      |
| 1224.4983           | 1224.3759   | -0.1224 | -100  | 689        | 698      | EGALCEENMR                  |           |         | Carbamidomethyl (C)[5], Oxidation (M)[9]  |                        |      | Mascot      |
| 1274.7103           | 1274.5836   | -0.1267 | -99   | 440        | 449      | EDLYLKPIQR                  |           |         |                                           |                        |      | Mascot      |
| 1378.7147           | 1378.5804   | -0.1343 | -97   | 728        | 739      | CLYASVLT AQPR               | 66        | 99.883  | Carbamidomethyl (C)[1]                    |                        |      | Mascot      |
| 1378.7147           | 1378.5804   | -0.1343 | -97   | 728        | 739      | CLYASVLT AQPR               |           |         | Carbamidomethyl (C)[1]                    |                        |      | Mascot      |
| 1402.8053           | 1402.6671   | -0.1382 | -99   | 439        | 449      | KEDLYLKPIQR                 |           |         |                                           |                        |      | Mascot      |
| 1444.7682           | 1444.6219   | -0.1463 | -101  | 846        | 858      | EGIPALDNFLDKL               |           |         |                                           |                        |      | Mascot      |
| 1494.8025           | 1494.6416   | -0.1609 | -108  | 288        | 299      | TFQCILDPIFK                 |           |         |                                           | Carbamidomethyl (C)[3] |      | Mascot      |
| 1534.8158           | 1534.6658   | -0.15   | -98   | 727        | 739      | RCLYASVLT AQPR              |           |         |                                           | Carbamidomethyl (C)[2] |      | Mascot      |
| 1615.7645           | 1615.608    | -0.1565 | -97   | 482        | 495      | TGTTTTFEHAHNMR              | 64        | 99.827  |                                           |                        |      | Mascot      |
| 1615.7645           | 1615.608    | -0.1565 | -97   | 482        | 495      | TGTTTTFEHAHNMR              |           |         |                                           |                        |      | Mascot      |
| 1631.7595           | 1631.5951   | -0.1644 | -101  | 482        | 495      | TGTTTTFEHAHNMR              |           |         | Oxidation (M)[13]                         |                        |      | Mascot      |
| 1742.8384           | 1742.6671   | -0.1713 | -98   | 634        | 647      | YLAKEYWDVAEAR               |           |         |                                           |                        |      | Mascot      |
| 1742.8384           | 1742.6671   | -0.1713 | -98   | 634        | 647      | YLAKEYWDVAEAR               | 114       | 100     |                                           |                        |      | Mascot      |
| 1799.8962           | 1799.7196   | -0.1766 | -98   | 786        | 801      | AYLPVNESFGFTADLR            | 124       | 100     |                                           |                        |      | Mascot      |
| 1799.8962           | 1799.7196   | -0.1766 | -98   | 786        | 801      | AYLPVNESFGFTADLR            |           |         |                                           |                        |      | Mascot      |
| 2143.0779           | 2142.8677   | -0.2102 | -98   | 606        | 625      | ARPPFDGLAEDIDKGEVS AR       | 50        | 95.41   |                                           |                        |      | Mascot      |
| 2143.0779           | 2142.8677   | -0.2102 | -98   | 606        | 625      | ARPPFDGLAEDIDKGEVS AR       |           |         |                                           |                        |      | Mascot      |
| 2220.1545           | 2219.9341   | -0.2204 | -99   | 163        | 180      | ALLELQLEPEELYQTQFOR         |           |         |                                           |                        |      | Mascot      |
| 2220.1545           | 2219.9341   | -0.2204 | -99   | 163        | 180      | ALLELQLEPEELYQTQFOR         | 100       | 100     |                                           |                        |      | Mascot      |
| 2233.1321           | 2232.9185   | -0.2136 | -96   | 648        | 667      | KIWCFGPDGTGPNILTDIT K       |           |         | Carbamidomethyl (C)[4]                    |                        |      | Mascot      |
| 2327.0681           | 2326.842    | -0.2261 | -97   | 367        | 386      | YRCELLYEGPPDDEAAM GIK       |           |         | Carbamidomethyl (C)[3]                    |                        |      | Mascot      |
| 2343.063            | 2342.8398   | -0.2232 | -95   | 367        | 386      | YRCELLYEGPPDDEAAM GIK       |           |         | Carbamidomethyl (C)[3], Oxidation (M)[17] |                        |      | Mascot      |
| 2353.2185           | 2352.99     | -0.2285 | -97   | 668        | 688      | GVQYLNEIKDSVVAGFQ WATK      |           |         |                                           |                        |      | Mascot      |
| 2462.2629           | 2462.0879   | -0.175  | -71   | 121        | 144      | VTDGALVVDCVSGVCV QTETVLR    |           |         |                                           |                        |      | Mascot      |
| 2576.3057           | 2576.0515   | -0.2542 | -99   | 121        | 144      | VTDGALVVDCVSGVCV QTETVLR    |           |         | Carbamidomethyl (C)[11,16]                |                        |      | Mascot      |
| 2989.5525           | 2989.2532   | -0.2993 | -100  | 740        | 765      | LMEPIYLVIEQCPEQVVG GIYGVNLR |           |         | Carbamidomethyl (C)[12]                   |                        |      | Mascot      |

6 unnamed protein product [Mus musculus] g|74213791 95206.9 6.41 23 761 100 577 100

| Peptide Information |             |         |       |            |          |                        |           |         |                                           |                        | Rank | Result Type |
|---------------------|-------------|---------|-------|------------|----------|------------------------|-----------|---------|-------------------------------------------|------------------------|------|-------------|
| Calc. Mass          | Obsrv. Mass | ± da    | ± ppm | Start Seq. | End Seq. | Sequence               | Ion Score | C. I. % | Modification                              |                        |      |             |
| 890.5093            | 890.4191    | -0.0902 | -101  | 499        | 506      | FSVSPVVR               |           |         |                                           |                        |      | Mascot      |
| 922.4628            | 922.3605    | -0.1023 | -111  | 573        | 580      | SDPVVSYR               |           |         |                                           |                        |      | Mascot      |
| 969.5475            | 969.4484    | -0.0991 | -102  | 717        | 726      | GGGQIPTAR              |           |         |                                           |                        |      | Mascot      |
| 1091.5844           | 1091.4723   | -0.1121 | -103  | 2          | 10       | VNFTVDQIR              |           |         |                                           |                        |      | Mascot      |
| 1091.5844           | 1091.4723   | -0.1121 | -103  | 2          | 10       | VNFTVDQIR              | 60        | 99.607  |                                           |                        |      | Mascot      |
| 1138.5164           | 1138.4023   | -0.1141 | -100  | 639        | 647      | YEWVDVAEAR             |           |         |                                           |                        |      | Mascot      |
| 1208.5034           | 1208.387    | -0.1164 | -96   | 689        | 698      | EGALCEENMR             |           |         | Carbamidomethyl (C)[5]                    |                        |      | Mascot      |
| 1224.4983           | 1224.3759   | -0.1224 | -100  | 689        | 698      | EGALCEENMR             |           |         | Carbamidomethyl (C)[5], Oxidation (M)[9]  |                        |      | Mascot      |
| 1274.7103           | 1274.5836   | -0.1267 | -99   | 440        | 449      | EDLYLKPIQR             |           |         |                                           |                        |      | Mascot      |
| 1378.7147           | 1378.5804   | -0.1343 | -97   | 728        | 739      | CLYASVLT AQPR          | 66        | 99.883  | Carbamidomethyl (C)[1]                    |                        |      | Mascot      |
| 1378.7147           | 1378.5804   | -0.1343 | -97   | 728        | 739      | CLYASVLT AQPR          |           |         | Carbamidomethyl (C)[1]                    |                        |      | Mascot      |
| 1402.8053           | 1402.6671   | -0.1382 | -99   | 439        | 449      | KEDLYLKPIQR            |           |         |                                           |                        |      | Mascot      |
| 1444.7682           | 1444.6219   | -0.1463 | -101  | 846        | 858      | EGIPALDNFLDKL          |           |         |                                           |                        |      | Mascot      |
| 1494.8025           | 1494.6416   | -0.1609 | -108  | 288        | 299      | TFQCILDPIFK            |           |         |                                           | Carbamidomethyl (C)[3] |      | Mascot      |
| 1534.8158           | 1534.6658   | -0.15   | -98   | 727        | 739      | RCLYASVLT AQPR         |           |         |                                           | Carbamidomethyl (C)[2] |      | Mascot      |
| 1615.7645           | 1615.608    | -0.1565 | -97   | 482        | 495      | TGTTTTFEHAHNMR         | 64        | 99.827  |                                           |                        |      | Mascot      |
| 1615.7645           | 1615.608    | -0.1565 | -97   | 482        | 495      | TGTTTTFEHAHNMR         |           |         |                                           |                        |      | Mascot      |
| 1631.7595           | 1631.5951   | -0.1644 | -101  | 482        | 495      | TGTTTTFEHAHNMR         |           |         | Oxidation (M)[13]                         |                        |      | Mascot      |
| 1742.8384           | 1742.6671   | -0.1713 | -98   | 634        | 647      | YLAKEYWDVAEAR          |           |         |                                           |                        |      | Mascot      |
| 1742.8384           | 1742.6671   | -0.1713 | -98   | 634        | 647      | YLAKEYWDVAEAR          | 114       | 100     |                                           |                        |      | Mascot      |
| 1799.8962           | 1799.7196   | -0.1766 | -98   | 786        | 801      | AYLPVNESFGFTADLR       | 124       | 100     |                                           |                        |      | Mascot      |
| 1799.8962           | 1799.7196   | -0.1766 | -98   | 786        | 801      | AYLPVNESFGFTADLR       |           |         |                                           |                        |      | Mascot      |
| 2143.0779           | 2142.8677   | -0.2102 | -98   | 606        | 625      | ARPPFDGLAEDIDKGEVS AR  | 50        | 95.41   |                                           |                        |      | Mascot      |
| 2143.0779           | 2142.8677   | -0.2102 | -98   | 606        | 625      | ARPPFDGLAEDIDKGEVS AR  |           |         |                                           |                        |      | Mascot      |
| 2220.1545           | 2219.9341   | -0.2204 | -99   | 163        | 180      | ALLELQLEPEELYQTQFOR    |           |         |                                           |                        |      | Mascot      |
| 2220.1545           | 2219.9341   | -0.2204 | -99   | 163        | 180      | ALLELQLEPEELYQTQFOR    | 100       | 100     |                                           |                        |      | Mascot      |
| 2233.1321           | 2232.9185   | -0.2136 | -96   | 648        | 667      | KIWCFGPDGTGPNILTDIT K  |           |         | Carbamidomethyl (C)[4]                    |                        |      | Mascot      |
| 2327.0681           | 2326.842    | -0.2261 | -97   | 367        | 386      | YRCELLYEGPPDDEAAM GIK  |           |         | Carbamidomethyl (C)[3]                    |                        |      | Mascot      |
| 2343.063            | 2342.8398   | -0.2232 | -95   | 367        | 386      | YRCELLYEGPPDDEAAM GIK  |           |         | Carbamidomethyl (C)[3], Oxidation (M)[17] |                        |      | Mascot      |
| 2353.2185           | 2352.99     | -0.2285 | -97   | 668        | 688      | GVQYLNEIKDSVVAGFQ WATK |           |         |                                           |                        |      | Mascot      |
| 2462.2629           | 2462.0879   | -0.175  | -71   | 121        | 144      | VTDGALVVDCVSGVCV       |           |         |                                           |                        |      | Mascot      |

|           |           |         |      |     |     |                               |                            |        |
|-----------|-----------|---------|------|-----|-----|-------------------------------|----------------------------|--------|
| 2576.3057 | 2576.0515 | -0.2542 | -99  | 121 | 144 | QTETVLR                       | Carbamidomethyl (C)[11,16] | Mascot |
|           |           |         |      |     |     | VTDGALVVDCVSGVCV<br>QTETVLR   |                            |        |
| 2817.4053 | 2817.1223 | -0.283  | -100 | 94  | 120 | DGSGFLNIDSPGHVDF<br>SSEVTAALR |                            | Mascot |
| 2989.5525 | 2989.2532 | -0.2993 | -100 | 740 | 765 | LMEPIYLVEIQCPQVVG<br>GIYGVNLR | Carbamidomethyl (C)[12]    | Mascot |

7 elongation factor 2 [Mus musculus] gi|33859482 95252.9 6.41 23 760 100 577 100

| Peptide Information |             |         |       |            |          |                               |           |         |                                           | Rank | Result Type |
|---------------------|-------------|---------|-------|------------|----------|-------------------------------|-----------|---------|-------------------------------------------|------|-------------|
| Calc. Mass          | Obsrv. Mass | ± da    | ± ppm | Start Seq. | End Seq. | Sequence                      | Ion Score | C. I. % | Modification                              |      |             |
| 890.5093            | 890.4191    | -0.0902 | -101  | 499        | 506      | FSVSPVVR                      |           |         |                                           |      | Mascot      |
| 922.4628            | 922.3605    | -0.1023 | -111  | 573        | 580      | SDPVVSYR                      |           |         |                                           |      | Mascot      |
| 969.5475            | 969.4484    | -0.0991 | -102  | 717        | 726      | GGGQIPTAR                     |           |         |                                           |      | Mascot      |
| 1091.5844           | 1091.4723   | -0.1121 | -103  | 2          | 10       | VNFTVDQIR                     | 60        | 99.607  |                                           |      | Mascot      |
| 1091.5844           | 1091.4723   | -0.1121 | -103  | 2          | 10       | VNFTVDQIR                     |           |         |                                           |      | Mascot      |
| 1138.5164           | 1138.4023   | -0.1141 | -100  | 639        | 647      | YEWVDAEAR                     |           |         |                                           |      | Mascot      |
| 1208.5034           | 1208.387    | -0.1164 | -96   | 689        | 698      | EGALCEENMR                    |           |         | Carbamidomethyl (C)[5]                    |      | Mascot      |
| 1224.4983           | 1224.3759   | -0.1224 | -100  | 689        | 698      | EGALCEENMR                    |           |         | Carbamidomethyl (C)[5], Oxidation (M)[9]  |      | Mascot      |
|                     | 1224.3759   |         |       |            |          |                               |           |         |                                           |      | Mascot      |
| 1274.7103           | 1274.5836   | -0.1267 | -99   | 440        | 449      | EDLYLKPIQR                    |           |         |                                           |      | Mascot      |
| 1378.7147           | 1378.5804   | -0.1343 | -97   | 728        | 739      | CLYASVLTQAPR                  | 66        | 99.883  | Carbamidomethyl (C)[1]                    |      | Mascot      |
| 1378.7147           | 1378.5804   | -0.1343 | -97   | 728        | 739      | CLYASVLTQAPR                  |           |         | Carbamidomethyl (C)[1]                    |      | Mascot      |
| 1402.8053           | 1402.6671   | -0.1382 | -99   | 439        | 449      | KEDLYLKPIQR                   |           |         |                                           |      | Mascot      |
| 1444.7682           | 1444.6219   | -0.1463 | -101  | 846        | 858      | EGIPALDNFLDKL                 |           |         |                                           |      | Mascot      |
| 1494.8025           | 1494.6416   | -0.1609 | -108  | 288        | 299      | TFQQLDPIFK                    |           |         | Carbamidomethyl (C)[3]                    |      | Mascot      |
| 1534.8158           | 1534.6658   | -0.15   | -98   | 727        | 739      | RCLYASVLTQAPR                 |           |         | Carbamidomethyl (C)[2]                    |      | Mascot      |
| 1615.7645           | 1615.608    | -0.1565 | -97   | 482        | 495      | TGTTTTFEHAHNMR                | 64        | 99.827  |                                           |      | Mascot      |
| 1615.7645           | 1615.608    | -0.1565 | -97   | 482        | 495      | TGTTTTFEHAHNMR                |           |         |                                           |      | Mascot      |
| 1631.7595           | 1631.5951   | -0.1644 | -101  | 482        | 495      | TGTTTTFEHAHNMR                |           |         | Oxidation (M)[13]                         |      | Mascot      |
| 1742.8384           | 1742.6671   | -0.1713 | -98   | 634        | 647      | YLAEKYEWVDAEAR                |           |         |                                           |      | Mascot      |
| 1742.8384           | 1742.6671   | -0.1713 | -98   | 634        | 647      | YLAEKYEWVDAEAR                | 114       | 100     |                                           |      | Mascot      |
| 1799.8962           | 1799.7196   | -0.1766 | -98   | 786        | 801      | AYLPVNESFGFTADLR              | 124       | 100     |                                           |      | Mascot      |
| 1799.8962           | 1799.7196   | -0.1766 | -98   | 786        | 801      | AYLPVNESFGFTADLR              |           |         |                                           |      | Mascot      |
| 2143.0779           | 2142.8677   | -0.2102 | -98   | 606        | 625      | ARPPFDGLAEDIDKGEVS<br>AR      | 50        | 95.41   |                                           |      | Mascot      |
| 2143.0779           | 2142.8677   | -0.2102 | -98   | 606        | 625      | ARPPFDGLAEDIDKGEVS<br>AR      |           |         |                                           |      | Mascot      |
| 2220.1545           | 2219.9341   | -0.2204 | -99   | 163        | 180      | ALLELQLEPEELYQTQFR            |           |         |                                           |      | Mascot      |
| 2220.1545           | 2219.9341   | -0.2204 | -99   | 163        | 180      | ALLELQLEPEELYQTQFR            | 100       | 100     |                                           |      | Mascot      |
| 2233.1321           | 2232.9185   | -0.2136 | -96   | 648        | 667      | KIWCFGPDGTGPNILTDIT<br>K      |           |         | Carbamidomethyl (C)[4]                    |      | Mascot      |
| 2327.0681           | 2326.842    | -0.2261 | -97   | 367        | 386      | YRCELLYEGPPDDEAAM<br>GIK      |           |         | Carbamidomethyl (C)[3]                    |      | Mascot      |
| 2343.063            | 2342.8398   | -0.2232 | -95   | 367        | 386      | YRCELLYEGPPDDEAAM<br>GIK      |           |         | Carbamidomethyl (C)[3], Oxidation (M)[17] |      | Mascot      |
| 2353.2185           | 2352.99     | -0.2285 | -97   | 668        | 688      | GVQYLNKDSVVGAFQ<br>WATK       |           |         |                                           |      | Mascot      |
| 2462.2629           | 2462.0879   | -0.175  | -71   | 121        | 144      | VTDGALVVDCVSGVCV<br>QTETVLR   |           |         |                                           |      | Mascot      |
| 2576.3057           | 2576.0515   | -0.2542 | -99   | 121        | 144      | VTDGALVVDCVSGVCV<br>QTETVLR   |           |         | Carbamidomethyl (C)[11,16]                |      | Mascot      |
| 2817.4053           | 2817.1223   | -0.283  | -100  | 94         | 120      | DGSGFLNIDSPGHVDF<br>SSEVTAALR |           |         |                                           |      | Mascot      |
| 2989.5525           | 2989.2532   | -0.2993 | -100  | 740        | 765      | LMEPIYLVEIQCPQVVG<br>GIYGVNLR |           |         | Carbamidomethyl (C)[12]                   |      | Mascot      |

8 elongation factor 2 [Cricetus cricetus] gi|387049 95334.9 6.31 23 760 100 577 100

| Peptide Information |             |         |       |            |          |                               |           |         |                                           | Rank | Result Type |
|---------------------|-------------|---------|-------|------------|----------|-------------------------------|-----------|---------|-------------------------------------------|------|-------------|
| Calc. Mass          | Obsrv. Mass | ± da    | ± ppm | Start Seq. | End Seq. | Sequence                      | Ion Score | C. I. % | Modification                              |      |             |
| 890.5093            | 890.4191    | -0.0902 | -101  | 499        | 506      | FSVSPVVR                      |           |         |                                           |      | Mascot      |
| 922.4628            | 922.3605    | -0.1023 | -111  | 573        | 580      | SDPVVSYR                      |           |         |                                           |      | Mascot      |
| 1013.501            | 1013.3998   | -0.1012 | -100  | 240        | 249      | GEGQLGPAER                    |           |         |                                           |      | Mascot      |
| 1091.5844           | 1091.4723   | -0.1121 | -103  | 2          | 10       | VNFTVDQIR                     | 60        | 99.607  |                                           |      | Mascot      |
| 1091.5844           | 1091.4723   | -0.1121 | -103  | 2          | 10       | VNFTVDQIR                     |           |         |                                           |      | Mascot      |
| 1138.5164           | 1138.4023   | -0.1141 | -100  | 639        | 647      | YEWVDAEAR                     |           |         |                                           |      | Mascot      |
| 1208.5034           | 1208.387    | -0.1164 | -96   | 689        | 698      | EGALCEENMR                    |           |         | Carbamidomethyl (C)[5]                    |      | Mascot      |
| 1224.4983           | 1224.3759   | -0.1224 | -100  | 689        | 698      | EGALCEENMR                    |           |         | Carbamidomethyl (C)[5], Oxidation (M)[9]  |      | Mascot      |
| 1274.7103           | 1274.5836   | -0.1267 | -99   | 440        | 449      | EDLYLKPIQR                    |           |         |                                           |      | Mascot      |
| 1378.7147           | 1378.5804   | -0.1343 | -97   | 728        | 739      | CLYASVLTQAPR                  | 66        | 99.883  | Carbamidomethyl (C)[1]                    |      | Mascot      |
| 1378.7147           | 1378.5804   | -0.1343 | -97   | 728        | 739      | CLYASVLTQAPR                  |           |         | Carbamidomethyl (C)[1]                    |      | Mascot      |
| 1402.8053           | 1402.6671   | -0.1382 | -99   | 439        | 449      | KEDLYLKPIQR                   |           |         |                                           |      | Mascot      |
| 1444.7682           | 1444.6219   | -0.1463 | -101  | 846        | 858      | EGIPALDNFLDKL                 |           |         |                                           |      | Mascot      |
| 1494.8025           | 1494.6416   | -0.1609 | -108  | 288        | 299      | TFQQLDPIFK                    |           |         | Carbamidomethyl (C)[3]                    |      | Mascot      |
| 1534.8158           | 1534.6658   | -0.15   | -98   | 727        | 739      | RCLYASVLTQAPR                 |           |         | Carbamidomethyl (C)[2]                    |      | Mascot      |
| 1615.7645           | 1615.608    | -0.1565 | -97   | 482        | 495      | TGTTTTFEHAHNMR                | 64        | 99.827  |                                           |      | Mascot      |
| 1615.7645           | 1615.608    | -0.1565 | -97   | 482        | 495      | TGTTTTFEHAHNMR                |           |         |                                           |      | Mascot      |
| 1631.7595           | 1631.5951   | -0.1644 | -101  | 482        | 495      | TGTTTTFEHAHNMR                |           |         | Oxidation (M)[13]                         |      | Mascot      |
| 1742.8384           | 1742.6671   | -0.1713 | -98   | 634        | 647      | YLAEKYEWVDAEAR                |           |         |                                           |      | Mascot      |
| 1742.8384           | 1742.6671   | -0.1713 | -98   | 634        | 647      | YLAEKYEWVDAEAR                | 114       | 100     |                                           |      | Mascot      |
| 1799.8962           | 1799.7196   | -0.1766 | -98   | 786        | 801      | AYLPVNESFGFTADLR              | 124       | 100     |                                           |      | Mascot      |
| 1799.8962           | 1799.7196   | -0.1766 | -98   | 786        | 801      | AYLPVNESFGFTADLR              |           |         |                                           |      | Mascot      |
| 2143.0779           | 2142.8677   | -0.2102 | -98   | 606        | 625      | ARPPFDGLAEDIDKGEVS<br>AR      | 50        | 95.41   |                                           |      | Mascot      |
| 2143.0779           | 2142.8677   | -0.2102 | -98   | 606        | 625      | ARPPFDGLAEDIDKGEVS<br>AR      |           |         |                                           |      | Mascot      |
| 2220.1545           | 2219.9341   | -0.2204 | -99   | 163        | 180      | ALLELQLEPEELYQTQFR            |           |         |                                           |      | Mascot      |
| 2220.1545           | 2219.9341   | -0.2204 | -99   | 163        | 180      | ALLELQLEPEELYQTQFR            | 100       | 100     |                                           |      | Mascot      |
| 2233.1321           | 2232.9185   | -0.2136 | -96   | 648        | 667      | KIWCFGPDGTGPNILTDIT<br>K      |           |         | Carbamidomethyl (C)[4]                    |      | Mascot      |
| 2327.0681           | 2326.842    | -0.2261 | -97   | 367        | 386      | YRCELLYEGPPDDEAAM<br>GIK      |           |         | Carbamidomethyl (C)[3]                    |      | Mascot      |
| 2343.063            | 2342.8398   | -0.2232 | -95   | 367        | 386      | YRCELLYEGPPDDEAAM<br>GIK      |           |         | Carbamidomethyl (C)[3], Oxidation (M)[17] |      | Mascot      |
| 2353.2185           | 2352.99     | -0.2285 | -97   | 668        | 688      | GVQYLNKDSVVGAFQ<br>WATK       |           |         |                                           |      | Mascot      |
| 2462.2629           | 2462.0879   | -0.175  | -71   | 121        | 144      | VTDGALVVDCVSGVCV<br>QTETVLR   |           |         |                                           |      | Mascot      |
| 2576.3057           | 2576.0515   | -0.2542 | -99   | 121        | 144      | VTDGALVVDCVSGVCV<br>QTETVLR   |           |         | Carbamidomethyl (C)[11,16]                |      | Mascot      |
| 2817.4053           | 2817.1223   | -0.283  | -100  | 94         | 120      | DGSGFLNIDSPGHVDF<br>SSEVTAALR |           |         |                                           |      | Mascot      |
| 2989.5525           | 2989.2532   | -0.2993 | -100  | 740        | 765      | LMEPIYLVEIQCPQVVG<br>GIYGVNLR |           |         | Carbamidomethyl (C)[12]                   |      | Mascot      |

9 unnamed protein product [Mus musculus] gi|74181334 95261.8 6.38 23 759 100 577 100

| Peptide Information |             |         |       |            |          |               |           |         |                                          | Rank | Result Type |
|---------------------|-------------|---------|-------|------------|----------|---------------|-----------|---------|------------------------------------------|------|-------------|
| Calc. Mass          | Obsrv. Mass | ± da    | ± ppm | Start Seq. | End Seq. | Sequence      | Ion Score | C. I. % | Modification                             |      |             |
| 890.5093            | 890.4191    | -0.0902 | -101  | 499        | 506      | FSVSPVVR      |           |         |                                          |      | Mascot      |
| 922.4628            | 922.3605    | -0.1023 | -111  | 573        | 580      | SDPVVSYR      |           |         |                                          |      | Mascot      |
| 969.5475            | 969.4484    | -0.0991 | -102  | 717        | 726      | GGGQIPTAR     |           |         |                                          |      | Mascot      |
| 1091.5844           | 1091.4723   | -0.1121 | -103  | 2          | 10       | VNFTVDQIR     | 60        | 99.607  |                                          |      | Mascot      |
| 1091.5844           | 1091.4723   | -0.1121 | -103  | 2          | 10       | VNFTVDQIR     |           |         |                                          |      | Mascot      |
| 1138.5164           | 1138.4023   | -0.1141 | -100  | 639        | 647      | YEWVDAEAR     |           |         |                                          |      | Mascot      |
| 1208.5034           | 1208.387    | -0.1164 | -96   | 689        | 698      | EGALCEENMR    |           |         | Carbamidomethyl (C)[5]                   |      | Mascot      |
| 1224.4983           | 1224.3759   | -0.1224 | -100  | 689        | 698      | EGALCEENMR    |           |         | Carbamidomethyl (C)[5], Oxidation (M)[9] |      | Mascot      |
| 1274.7103           | 1274.5836   | -0.1267 | -99   | 440        | 449      | EDLYLKPIQR    |           |         |                                          |      | Mascot      |
| 1378.7147           | 1378.5804   | -0.1343 | -97   | 728        | 739      | CLYASVLTQAPR  | 66        | 99.883  | Carbamidomethyl (C)[1]                   |      | Mascot      |
| 1402.8053           | 1402.6671   | -0.1382 | -99   | 439        | 449      | KEDLYLKPIQR   |           |         | Carbamidomethyl (C)[1]                   |      | Mascot      |
| 1444.7682           | 1444.6219   | -0.1463 | -101  | 846        | 858      | EGIPALDNFLDKL |           |         |                                          |      | Mascot      |

|           |           |         |      |     |     |                                  |     |        |  |                                           |        |
|-----------|-----------|---------|------|-----|-----|----------------------------------|-----|--------|--|-------------------------------------------|--------|
| 1494.8025 | 1494.6416 | -0.1609 | -108 | 288 | 299 | TFQQLDPIFK                       |     |        |  | Carbamidomethyl (C)[3]                    | Mascot |
| 1534.8158 | 1534.6658 | -0.15   | -98  | 727 | 739 | RCLYASVLTAQPR                    |     |        |  | Carbamidomethyl (C)[2]                    | Mascot |
| 1615.7645 | 1615.608  | -0.1565 | -97  | 482 | 495 | TGTTTTFEHAHNR                    | 64  | 99.827 |  |                                           | Mascot |
| 1615.7645 | 1615.608  | -0.1565 | -97  | 482 | 495 | TGTTTTFEHAHNR                    |     |        |  |                                           | Mascot |
| 1631.7595 | 1631.5951 | -0.1644 | -101 | 482 | 495 | TGTTTTFEHAHNR                    |     |        |  | Oxidation (M)[13]                         | Mascot |
| 1742.8384 | 1742.6671 | -0.1713 | -98  | 634 | 647 | YLAEKYWDVAEAR                    |     |        |  |                                           | Mascot |
| 1742.8384 | 1742.6671 | -0.1713 | -98  | 634 | 647 | YLAEKYWDVAEAR                    | 114 | 100    |  |                                           | Mascot |
| 1799.8962 | 1799.7196 | -0.1766 | -98  | 786 | 801 | AYLPVNESFGFTADLR                 | 124 | 100    |  |                                           | Mascot |
| 1799.8962 | 1799.7196 | -0.1766 | -98  | 786 | 801 | AYLPVNESFGFTADLR                 |     |        |  |                                           | Mascot |
| 2143.0779 | 2142.8677 | -0.2102 | -98  | 606 | 625 | ARPPFDGLAEDIDKGEVS<br>AR         | 50  | 95.41  |  |                                           | Mascot |
| 2143.0779 | 2142.8677 | -0.2102 | -98  | 606 | 625 | ARPPFDGLAEDIDKGEVS<br>AR         |     |        |  |                                           | Mascot |
| 2220.1545 | 2219.9341 | -0.2204 | -99  | 163 | 180 | ALLELQLEPEELYQTQFOR              |     |        |  |                                           | Mascot |
| 2220.1545 | 2219.9341 | -0.2204 | -99  | 163 | 180 | ALLELQLEPEELYQTQFOR              | 100 | 100    |  |                                           | Mascot |
| 2233.1321 | 2232.9185 | -0.2136 | -96  | 648 | 667 | KIWCFGPDGTGPNILTDIT<br>K         |     |        |  | Carbamidomethyl (C)[4]                    | Mascot |
| 2327.0681 | 2326.842  | -0.2261 | -97  | 367 | 386 | YRCELLYEGPPDDEAAM<br>GIK         |     |        |  | Carbamidomethyl (C)[3]                    | Mascot |
| 2343.063  | 2342.8398 | -0.2232 | -95  | 367 | 386 | YRCELLYEGPPDDEAAM<br>GIK         |     |        |  | Carbamidomethyl (C)[3], Oxidation (M)[17] | Mascot |
| 2353.2185 | 2352.99   | -0.2285 | -97  | 668 | 688 | GVQYLNEIKDSVVAGFQ<br>WATK        |     |        |  |                                           | Mascot |
| 2462.2629 | 2462.0879 | -0.175  | -71  | 121 | 144 | VTDGALVVDCVSGVCV<br>QTETVLR      |     |        |  |                                           | Mascot |
| 2576.3057 | 2576.0515 | -0.2542 | -99  | 121 | 144 | VTDGALVVDCVSGVCV<br>QTETVLR      |     |        |  | Carbamidomethyl (C)[11,16]                | Mascot |
| 2817.4053 | 2817.1223 | -0.283  | -100 | 94  | 120 | DGSGFLNLI DSPGHVDF<br>SSEVTAAALR |     |        |  |                                           | Mascot |
| 2989.5525 | 2989.2532 | -0.2993 | -100 | 740 | 765 | LMEPIYLVEIQCEPVVG<br>GIYGLNLR    |     |        |  | Carbamidomethyl (C)[12]                   | Mascot |

10 elongation factor 2 [Cricetus griseus] gi|304505 95262.9 6.41 22 750 100 577 100

| Calc. Mass | Obsrv. Mass | ± da    | ± ppm | Start Seq. | End Seq. | Sequence                         | Ion Score | C. I. % | Modification | Rank                                      | Result Type |
|------------|-------------|---------|-------|------------|----------|----------------------------------|-----------|---------|--------------|-------------------------------------------|-------------|
| 890.5093   | 890.4191    | -0.0902 | -101  | 499        | 506      | FSVSPVVR                         |           |         |              |                                           | Mascot      |
| 922.4628   | 922.3605    | -0.1023 | -111  | 573        | 580      | SDPVSYR                          |           |         |              |                                           | Mascot      |
| 969.5475   | 969.4484    | -0.0991 | -102  | 717        | 726      | GGGQIPTAR                        |           |         |              |                                           | Mascot      |
| 1013.501   | 1013.3998   | -0.1012 | -100  | 240        | 249      | GEGQLGPAER                       |           |         |              |                                           | Mascot      |
| 1091.5844  | 1091.4723   | -0.1121 | -103  | 2          | 10       | VNFTVDQIR                        |           |         |              |                                           | Mascot      |
| 1091.5844  | 1091.4723   | -0.1121 | -103  | 2          | 10       | VNFTVDQIR                        | 60        | 99.607  |              |                                           | Mascot      |
| 1138.5164  | 1138.4023   | -0.1141 | -100  | 639        | 647      | YVNDVAEAR                        |           |         |              |                                           | Mascot      |
| 1208.5034  | 1208.387    | -0.1164 | -96   | 689        | 698      | EGALCEENMR                       |           |         |              | Carbamidomethyl (C)[5]                    | Mascot      |
| 1224.4983  | 1224.3759   | -0.1224 | -100  | 689        | 698      | EGALCEENMR                       |           |         |              | Carbamidomethyl (C)[5], Oxidation (M)[9]  | Mascot      |
| 1378.7147  | 1378.5804   | -0.1343 | -97   | 728        | 739      | CLYASVLTAQPR                     | 66        | 99.883  |              | Carbamidomethyl (C)[1]                    | Mascot      |
| 1378.7147  | 1378.5804   | -0.1343 | -97   | 728        | 739      | CLYASVLTAQPR                     |           |         |              | Carbamidomethyl (C)[1]                    | Mascot      |
| 1444.7682  | 1444.6219   | -0.1463 | -101  | 846        | 858      | EGIPALDNFLDKL                    |           |         |              |                                           | Mascot      |
| 1494.9025  | 1494.8416   | -0.1609 | -108  | 288        | 299      | TFQQLDPIFK                       |           |         |              | Carbamidomethyl (C)[3]                    | Mascot      |
| 1534.8158  | 1534.6658   | -0.15   | -98   | 727        | 739      | RCLYASVLTAQPR                    |           |         |              | Carbamidomethyl (C)[2]                    | Mascot      |
| 1615.7645  | 1615.608    | -0.1565 | -97   | 482        | 495      | TGTTTTFEHAHNR                    | 64        | 99.827  |              |                                           | Mascot      |
| 1615.7645  | 1615.608    | -0.1565 | -97   | 482        | 495      | TGTTTTFEHAHNR                    |           |         |              |                                           | Mascot      |
| 1631.7595  | 1631.5951   | -0.1644 | -101  | 482        | 495      | TGTTTTFEHAHNR                    |           |         |              | Oxidation (M)[13]                         | Mascot      |
| 1742.8384  | 1742.6671   | -0.1713 | -98   | 634        | 647      | YLAEKYWDVAEAR                    |           |         |              |                                           | Mascot      |
| 1742.8384  | 1742.6671   | -0.1713 | -98   | 634        | 647      | YLAEKYWDVAEAR                    | 114       | 100     |              |                                           | Mascot      |
| 1799.8962  | 1799.7196   | -0.1766 | -98   | 786        | 801      | AYLPVNESFGFTADLR                 | 124       | 100     |              |                                           | Mascot      |
| 1799.8962  | 1799.7196   | -0.1766 | -98   | 786        | 801      | AYLPVNESFGFTADLR                 |           |         |              |                                           | Mascot      |
| 2143.0779  | 2142.8677   | -0.2102 | -98   | 606        | 625      | ARPPFDGLAEDIDKGEVS<br>AR         | 50        | 95.41   |              |                                           | Mascot      |
| 2143.0779  | 2142.8677   | -0.2102 | -98   | 606        | 625      | ARPPFDGLAEDIDKGEVS<br>AR         |           |         |              |                                           | Mascot      |
| 2220.1545  | 2219.9341   | -0.2204 | -99   | 163        | 180      | ALLELQLEPEELYQTQFOR              |           |         |              |                                           | Mascot      |
| 2220.1545  | 2219.9341   | -0.2204 | -99   | 163        | 180      | ALLELQLEPEELYQTQFOR              | 100       | 100     |              |                                           | Mascot      |
| 2233.1321  | 2232.9185   | -0.2136 | -96   | 648        | 667      | KIWCFGPDGTGPNILTDIT<br>K         |           |         |              | Carbamidomethyl (C)[4]                    | Mascot      |
| 2327.0681  | 2326.842    | -0.2261 | -97   | 367        | 386      | YRCELLYEGPPDDEAAM<br>GIK         |           |         |              | Carbamidomethyl (C)[3]                    | Mascot      |
| 2343.063   | 2342.8398   | -0.2232 | -95   | 367        | 386      | YRCELLYEGPPDDEAAM<br>GIK         |           |         |              | Carbamidomethyl (C)[3], Oxidation (M)[17] | Mascot      |
| 2353.2185  | 2352.99     | -0.2285 | -97   | 668        | 688      | GVQYLNEIKDSVVAGFQ<br>WATK        |           |         |              |                                           | Mascot      |
| 2462.2629  | 2462.0879   | -0.175  | -71   | 121        | 144      | VTDGALVVDCVSGVCV<br>QTETVLR      |           |         |              |                                           | Mascot      |
| 2576.3057  | 2576.0515   | -0.2542 | -99   | 121        | 144      | VTDGALVVDCVSGVCV<br>QTETVLR      |           |         |              | Carbamidomethyl (C)[11,16]                | Mascot      |
| 2817.4053  | 2817.1223   | -0.283  | -100  | 94         | 120      | DGSGFLNLI DSPGHVDF<br>SSEVTAAALR |           |         |              |                                           | Mascot      |
| 2989.5525  | 2989.2532   | -0.2993 | -100  | 740        | 765      | LMEPIYLVEIQCEPVVG<br>GIYGLNLR    |           |         |              | Carbamidomethyl (C)[12]                   | Mascot      |

| Gel Idx/Pos | 3/A5         | Instr./Gel Origin | AB4700/110211A | Process Status | Analysis Succeeded |
|-------------|--------------|-------------------|----------------|----------------|--------------------|
| Plate [#]   | 1            | Instrument        | Sample Name    | Spectra        | 8                  |
| Rank        | Protein Name | Species           | Accession No.  | Protein MW     | Protein PI Count   |

1 RecName: Full=Serotransferrin; Short=Transferrin; AltName: Full=Beta-1 metal-binding globulin; AltN gi|2501351 77702.7 6.75 25 518 100 358 100

| Calc. Mass | Obsrv. Mass | ± da    | ± ppm | Start Seq. | End Seq. | Sequence                 | Ion Score | C. I. % | Modification           | Rank                       | Result Type |
|------------|-------------|---------|-------|------------|----------|--------------------------|-----------|---------|------------------------|----------------------------|-------------|
| 887.4152   | 887.3236    | -0.0916 | -103  | 135        | 142      | SCHTGLGR                 |           |         | Carbamidomethyl (C)[2] |                            | Mascot      |
| 936.5009   | 936.4019    | -0.099  | -106  | 608        | 616      | GPNHAVVSR                |           |         |                        |                            | Mascot      |
| 1064.5959  | 1064.4829   | -0.113  | -106  | 608        | 617      | GPNHAVVSRK               |           |         |                        |                            | Mascot      |
| 1097.505   | 1097.3854   | -0.1196 | -109  | 540        | 548      | YYGYTGAFR                | 69        | 99.963  |                        |                            | Mascot      |
| 1097.505   | 1097.3854   | -0.1196 | -109  | 540        | 548      | YYGYTGAFR                |           |         |                        |                            | Mascot      |
| 1104.4739  | 1104.3842   | -0.0897 | -81   | 531        | 539      | ECVPNSNER                |           |         |                        | Carbamidomethyl (C)[2]     | Mascot      |
| 1156.5316  | 1156.4103   | -0.1213 | -105  | 366        | 374      | WCAIGHQER                |           |         |                        | Carbamidomethyl (C)[2]     | Mascot      |
| 1156.5316  | 1156.4103   | -0.1213 | -105  | 366        | 374      | WCAIGHQER                | 65        | 99.906  |                        | Carbamidomethyl (C)[2]     | Mascot      |
| 1250.6376  | 1250.5021   | -0.1355 | -108  | 122        | 131      | DTDFKLNELR               |           |         |                        |                            | Mascot      |
| 1251.6262  | 1251.4987   | -0.1275 | -102  | 38         | 47       | CASFRENILR               |           |         |                        | Carbamidomethyl (C)[1]     | Mascot      |
| 1311.6539  | 1311.5186   | -0.1353 | -103  | 156        | 166      | ELPDQESIQR               |           |         |                        |                            | Mascot      |
| 1346.6157  | 1346.4819   | -0.1338 | -99   | 27         | 37       | WCISTHEANK               |           |         |                        | Carbamidomethyl (C)[2]     | Mascot      |
| 1354.6056  | 1354.4659   | -0.1397 | -103  | 245        | 255      | NYELLCGDNTR              |           |         |                        | Carbamidomethyl (C)[6]     | Mascot      |
| 1447.6594  | 1447.5092   | -0.1502 | -104  | 527        | 539      | GTGCKVPSNER              |           |         |                        | Carbamidomethyl (C)[6]     | Mascot      |
| 1478.7825  | 1478.6118   | -0.1707 | -115  | 143        | 155      | SAGWNIPMAKLYK            |           |         |                        |                            | Mascot      |
| 1482.7006  | 1482.5701   | -0.1305 | -88   | 245        | 256      | NYELLCGDNTRK             |           |         |                        | Carbamidomethyl (C)[6]     | Mascot      |
| 1510.743   | 1510.5862   | -0.1568 | -104  | 595        | 607      | KPTDNLNCHLAR             |           |         |                        | Carbamidomethyl (C)[9]     | Mascot      |
| 1640.7664  | 1640.6005   | -0.1659 | -101  | 230        | 243      | HSTVFDNLNPNEDR           |           |         |                        |                            | Mascot      |
| 1640.7664  | 1640.6005   | -0.1659 | -101  | 230        | 243      | HSTVFDNLNPNEDR           | 27        | 0       |                        |                            | Mascot      |
| 1644.7111  | 1644.5482   | -0.1629 | -99   | 499        | 513      | FDEFFSAGCAPGSPR          |           |         |                        | Carbamidomethyl (C)[9]     | Mascot      |
| 1715.8962  | 1715.7151   | -0.1811 | -106  | 153        | 166      | LYKELPDQESIQR            |           |         |                        |                            | Mascot      |
| 1715.8962  | 1715.7151   | -0.1811 | -106  | 153        | 166      | LYKELPDQESIQR            | 90        | 100     |                        |                            | Mascot      |
| 1768.8613  | 1768.6768   | -0.1845 | -104  | 230        | 244      | HSTVFDNLNPNEDRK          |           |         |                        |                            | Mascot      |
| 1880.7731  | 1880.7297   | -0.0434 | -23   | 200        | 216      | CACSNHEPYFGYSGAFK        |           |         |                        |                            | Mascot      |
| 1939.9403  | 1939.7375   | -0.2028 | -105  | 591        | 607      | DGTRKPVDAENCHLAR         |           |         |                        | Carbamidomethyl (C)[13]    | Mascot      |
| 1994.8159  | 1994.6121   | -0.2038 | -102  | 200        | 216      | CACSNHEPYFGYSGAFK        |           |         |                        | Carbamidomethyl (C)[1,3]   | Mascot      |
| 2261.9954  | 2261.7678   | -0.2276 | -101  | 167        | 187      | AAANFFSASCVPDAQS<br>SFPK |           |         |                        | Carbamidomethyl (C)[10,13] | Mascot      |
| 2274.0066  | 2273.7654   | -0.2412 | -106  | 494        | 513      | INNCKFDEFFSAGCAPGS<br>PR | 109       | 100     |                        | Carbamidomethyl (C)[4,14]  | Mascot      |
| 2274.0066  | 2273.7654   | -0.2412 | -106  | 494        | 513      | INNCKFDEFFSAGCAPGS<br>PR |           |         |                        | Carbamidomethyl (C)[4,14]  | Mascot      |
| 2410.1165  | 2409.8704   | -0.2461 | -102  | 257        | 277      | SVDDYQECYLAMP/PSHA       |           |         |                        | Carbamidomethyl (C)[8]     | Mascot      |

|           |           |         |      |     |     |                           |                                           |        |
|-----------|-----------|---------|------|-----|-----|---------------------------|-------------------------------------------|--------|
| 2426.1116 | 2425.8625 | -0.2491 | -103 | 257 | 277 | VVAR<br>SVDDYQECYLAMVPSHA | Carbamidomethyl (C)[8], Oxidation (M)[12] | Mascot |
| 2538.2114 | 2537.9512 | -0.2602 | -103 | 256 | 277 | VVAR<br>KSVDDYQECYLAMVPSH | Carbamidomethyl (C)[9]                    | Mascot |
| 2554.2065 | 2553.9509 | -0.2556 | -100 | 256 | 277 | VVAR<br>KSVDDYQECYLAMVPSH | Carbamidomethyl (C)[9], Oxidation (M)[13] | Mascot |

2 serotransferrin precursor [Bos taurus] gi|114326282 77688.7 6.75 24 507 100 358 100

| Peptide Information |             |         |       |            |          |                     |           |         |                                           | Rank | Result | Type |
|---------------------|-------------|---------|-------|------------|----------|---------------------|-----------|---------|-------------------------------------------|------|--------|------|
| Calc. Mass          | Obsrv. Mass | ± da    | ± ppm | Start Seq. | End Seq. | Sequence            | Ion Score | C. I. % | Modification                              |      |        |      |
| 887.4152            | 887.3236    | -0.0916 | -103  | 135        | 142      | SCHTGLGR            |           |         | Carbamidomethyl (C)[2]                    |      | Mascot |      |
| 936.5009            | 936.4019    | -0.099  | -106  | 608        | 616      | GPNHAVVSR           |           |         |                                           |      | Mascot |      |
| 1064.5959           | 1064.4829   | -0.113  | -106  | 608        | 617      | GPNHAVVSRK          |           |         |                                           |      | Mascot |      |
| 1097.505            | 1097.3854   | -0.1196 | -109  | 540        | 548      | YYGYTGAFR           | 69        | 99.963  |                                           |      | Mascot |      |
| 1097.505            | 1097.3854   | -0.1196 | -109  | 540        | 548      | YYGYTGAFR           |           |         |                                           |      | Mascot |      |
| 1104.4739           | 1104.3842   | -0.0897 | -81   | 531        | 539      | ECVPNSNER           |           |         | Carbamidomethyl (C)[2]                    |      | Mascot |      |
| 1156.5316           | 1156.4103   | -0.1213 | -105  | 366        | 374      | WCAIGHQER           |           |         | Carbamidomethyl (C)[2]                    |      | Mascot |      |
| 1156.5316           | 1156.4103   | -0.1213 | -105  | 366        | 374      | WCAIGHQER           | 65        | 99.906  | Carbamidomethyl (C)[2]                    |      | Mascot |      |
| 1250.6376           | 1250.5021   | -0.1355 | -108  | 122        | 131      | DTDFKLNELR          |           |         |                                           |      | Mascot |      |
| 1251.6262           | 1251.4987   | -0.1275 | -102  | 38         | 47       | CASFRENVL R         |           |         | Carbamidomethyl (C)[1]                    |      | Mascot |      |
| 1311.6539           | 1311.5186   | -0.1353 | -103  | 156        | 166      | ELPDPQESIOR         |           |         |                                           |      | Mascot |      |
| 1346.6157           | 1346.4819   | -0.1338 | -99   | 27         | 37       | WCTISTHEANK         |           |         | Carbamidomethyl (C)[2]                    |      | Mascot |      |
| 1354.6056           | 1354.4659   | -0.1397 | -103  | 245        | 255      | NYELLCGDNTR         |           |         | Carbamidomethyl (C)[6]                    |      | Mascot |      |
| 1447.6594           | 1447.5092   | -0.1502 | -104  | 527        | 539      | GTGKCVPN SNER       |           |         | Carbamidomethyl (C)[6]                    |      | Mascot |      |
| 1482.7006           | 1482.5701   | -0.1305 | -88   | 245        | 256      | NYELLCGDNTRK        |           |         | Carbamidomethyl (C)[6]                    |      | Mascot |      |
| 1510.743            | 1510.5862   | -0.1568 | -104  | 595        | 607      | KPVTDAENCHLAR       |           |         | Carbamidomethyl (C)[9]                    |      | Mascot |      |
| 1640.7664           | 1640.6005   | -0.1659 | -101  | 230        | 243      | HSTVFDNLPN PEDR     | 27        | 0       |                                           |      | Mascot |      |
| 1644.7111           | 1644.5482   | -0.1629 | -99   | 499        | 513      | FDEFFSAGCAPGSPR     |           |         | Carbamidomethyl (C)[9]                    |      | Mascot |      |
| 1715.8962           | 1715.7151   | -0.1811 | -106  | 153        | 166      | LYKELPDQESIOR       |           |         |                                           |      | Mascot |      |
| 1715.8962           | 1715.7151   | -0.1811 | -106  | 153        | 166      | LYKELPDQESIOR       | 90        | 100     |                                           |      | Mascot |      |
| 1768.8613           | 1768.6768   | -0.1845 | -104  | 230        | 244      | HSTVFDNLPN PEDRK    |           |         |                                           |      | Mascot |      |
| 1880.7731           | 1880.7297   | -0.0434 | -23   | 200        | 216      | CACSNHEPYFGYSGAFK   |           |         |                                           |      | Mascot |      |
| 1939.9403           | 1939.7375   | -0.2028 | -105  | 591        | 607      | DGTRKPVTD AENCHLAR  |           |         | Carbamidomethyl (C)[13]                   |      | Mascot |      |
| 1994.8159           | 1994.6121   | -0.2038 | -102  | 200        | 216      | CACSNHEPYFGYSGAFK   |           |         | Carbamidomethyl (C)[1.3]                  |      | Mascot |      |
| 2261.9954           | 2261.7678   | -0.2276 | -101  | 167        | 187      | AAANFFSASCVP CADQGS |           |         | Carbamidomethyl (C)[10,13]                |      | Mascot |      |
|                     |             |         |       |            |          | SFPK                |           |         |                                           |      |        |      |
| 2274.0066           | 2273.7654   | -0.2412 | -106  | 494        | 513      | INCKFDEFFSAGCAPGS   | 109       | 100     | Carbamidomethyl (C)[4,14]                 |      | Mascot |      |
|                     |             |         |       |            |          | PR                  |           |         |                                           |      |        |      |
| 2274.0066           | 2273.7654   | -0.2412 | -106  | 494        | 513      | INCKFDEFFSAGCAPGS   |           |         | Carbamidomethyl (C)[4,14]                 |      | Mascot |      |
|                     |             |         |       |            |          | PR                  |           |         |                                           |      |        |      |
| 2410.1165           | 2409.8704   | -0.2461 | -102  | 257        | 277      | SVDDYQECYLAMVPSHA   |           |         | Carbamidomethyl (C)[8]                    |      | Mascot |      |
|                     |             |         |       |            |          | VVAR                |           |         |                                           |      |        |      |
| 2426.1116           | 2425.8625   | -0.2491 | -103  | 257        | 277      | SVDDYQECYLAMVPSHA   |           |         | Carbamidomethyl (C)[8], Oxidation (M)[12] |      | Mascot |      |
|                     |             |         |       |            |          | VVAR                |           |         |                                           |      |        |      |
| 2538.2114           | 2537.9512   | -0.2602 | -103  | 256        | 277      | KSVDDYQECYLAMVPSH   |           |         | Carbamidomethyl (C)[9]                    |      | Mascot |      |
|                     |             |         |       |            |          | AVVAR               |           |         |                                           |      |        |      |
| 2554.2065           | 2553.9509   | -0.2556 | -100  | 256        | 277      | KSVDDYQECYLAMVPSH   |           |         | Carbamidomethyl (C)[9], Oxidation (M)[13] |      | Mascot |      |
|                     |             |         |       |            |          | AVVAR               |           |         |                                           |      |        |      |

3 serotransferrin precursor [Bos taurus] gi|296490958 77615.7 7.13 23 490 100 358 100

| Peptide Information |             |         |       |            |          |                     |           |         |                            | Rank | Result | Type |
|---------------------|-------------|---------|-------|------------|----------|---------------------|-----------|---------|----------------------------|------|--------|------|
| Calc. Mass          | Obsrv. Mass | ± da    | ± ppm | Start Seq. | End Seq. | Sequence            | Ion Score | C. I. % | Modification               |      |        |      |
| 887.4152            | 887.3236    | -0.0916 | -103  | 135        | 142      | SCHTGLGR            |           |         | Carbamidomethyl (C)[2]     |      | Mascot |      |
| 936.5009            | 936.4019    | -0.099  | -106  | 608        | 616      | GPNHAVVSR           |           |         |                            |      | Mascot |      |
| 1064.5959           | 1064.4829   | -0.113  | -106  | 608        | 617      | GPNHAVVSRK          |           |         |                            |      | Mascot |      |
| 1097.505            | 1097.3854   | -0.1196 | -109  | 540        | 548      | YYGYTGAFR           | 69        | 99.963  |                            |      | Mascot |      |
| 1097.505            | 1097.3854   | -0.1196 | -109  | 540        | 548      | YYGYTGAFR           |           |         |                            |      | Mascot |      |
| 1104.4739           | 1104.3842   | -0.0897 | -81   | 531        | 539      | ECVPNSNER           |           |         | Carbamidomethyl (C)[2]     |      | Mascot |      |
| 1156.5316           | 1156.4103   | -0.1213 | -105  | 366        | 374      | WCAIGHQER           |           |         | Carbamidomethyl (C)[2]     |      | Mascot |      |
| 1156.5316           | 1156.4103   | -0.1213 | -105  | 366        | 374      | WCAIGHQER           | 65        | 99.906  | Carbamidomethyl (C)[2]     |      | Mascot |      |
| 1250.6376           | 1250.5021   | -0.1355 | -108  | 122        | 131      | DTDFKLNELR          |           |         |                            |      | Mascot |      |
| 1251.6262           | 1251.4987   | -0.1275 | -102  | 38         | 47       | CASFRENVL R         |           |         | Carbamidomethyl (C)[1]     |      | Mascot |      |
| 1311.6539           | 1311.5186   | -0.1353 | -103  | 156        | 166      | ELPDPQESIOR         |           |         |                            |      | Mascot |      |
| 1346.6157           | 1346.4819   | -0.1338 | -99   | 27         | 37       | WCTISTHEANK         |           |         | Carbamidomethyl (C)[2]     |      | Mascot |      |
| 1354.6056           | 1354.4659   | -0.1397 | -103  | 245        | 255      | NYELLCGDNTR         |           |         | Carbamidomethyl (C)[6]     |      | Mascot |      |
| 1447.6594           | 1447.5092   | -0.1502 | -104  | 527        | 539      | GTGKCVPN SNER       |           |         | Carbamidomethyl (C)[6]     |      | Mascot |      |
| 1482.7006           | 1482.5701   | -0.1305 | -88   | 245        | 256      | NYELLCGDNTRK        |           |         | Carbamidomethyl (C)[6]     |      | Mascot |      |
| 1510.743            | 1510.5862   | -0.1568 | -104  | 595        | 607      | KPVTDAENCHLAR       |           |         | Carbamidomethyl (C)[9]     |      | Mascot |      |
| 1640.7664           | 1640.6005   | -0.1659 | -101  | 230        | 243      | HSTVFDNLPN PEDR     | 27        | 0       |                            |      | Mascot |      |
| 1644.7111           | 1644.5482   | -0.1629 | -99   | 499        | 513      | FDEFFSAGCAPGSPR     |           |         | Carbamidomethyl (C)[9]     |      | Mascot |      |
| 1715.8962           | 1715.7151   | -0.1811 | -106  | 153        | 166      | LYKELPDQESIOR       |           |         |                            |      | Mascot |      |
| 1715.8962           | 1715.7151   | -0.1811 | -106  | 153        | 166      | LYKELPDQESIOR       | 90        | 100     |                            |      | Mascot |      |
| 1768.8613           | 1768.6768   | -0.1845 | -104  | 230        | 244      | HSTVFDNLPN PEDRK    |           |         |                            |      | Mascot |      |
| 1880.7731           | 1880.7297   | -0.0434 | -23   | 200        | 216      | CACSNHEPYFGYSGAFK   |           |         |                            |      | Mascot |      |
| 1939.9403           | 1939.7375   | -0.2028 | -105  | 591        | 607      | DGTRKPVTD AENCHLAR  |           |         | Carbamidomethyl (C)[13]    |      | Mascot |      |
| 1994.8159           | 1994.6121   | -0.2038 | -102  | 200        | 216      | CACSNHEPYFGYSGAFK   |           |         | Carbamidomethyl (C)[1.3]   |      | Mascot |      |
| 2261.9954           | 2261.7678   | -0.2276 | -101  | 167        | 187      | AAANFFSASCVP CADQGS |           |         | Carbamidomethyl (C)[10,13] |      | Mascot |      |
|                     |             |         |       |            |          | SFPK                |           |         |                            |      |        |      |
| 2274.0066           | 2273.7654   | -0.2412 | -106  | 494        | 513      | INCKFDEFFSAGCAPGS   | 109       | 100     | Carbamidomethyl (C)[4,14]  |      | Mascot |      |
|                     |             |         |       |            |          | PR                  |           |         |                            |      |        |      |
| 2274.0066           | 2273.7654   | -0.2412 | -106  | 494        | 513      | INCKFDEFFSAGCAPGS   |           |         | Carbamidomethyl (C)[4,14]  |      | Mascot |      |
|                     |             |         |       |            |          | PR                  |           |         |                            |      |        |      |
| 2409.1326           | 2408.8784   | -0.2542 | -106  | 257        | 277      | SVDDYQECYLAMVPSHA   |           |         | Carbamidomethyl (C)[8]     |      | Mascot |      |
|                     |             |         |       |            |          | VVAR                |           |         |                            |      |        |      |

4 transferrin [Bos grunniens] gi|209973077 77607.8 6.92 19 366 100 269 100

| Peptide Information |             |         |       |            |          |                    |           |         |                                           | Rank | Result | Type |
|---------------------|-------------|---------|-------|------------|----------|--------------------|-----------|---------|-------------------------------------------|------|--------|------|
| Calc. Mass          | Obsrv. Mass | ± da    | ± ppm | Start Seq. | End Seq. | Sequence           | Ion Score | C. I. % | Modification                              |      |        |      |
| 887.4152            | 887.3236    | -0.0916 | -103  | 135        | 142      | SCHTGLGR           |           |         | Carbamidomethyl (C)[2]                    |      | Mascot |      |
| 1088.5305           | 1088.4176   | -0.1129 | -104  | 143        | 152      | SAGWNIPMGR         |           |         |                                           |      | Mascot |      |
| 1097.505            | 1097.3854   | -0.1196 | -109  | 540        | 548      | YYGYTGAFR          | 69        | 99.963  |                                           |      | Mascot |      |
| 1097.505            | 1097.3854   | -0.1196 | -109  | 540        | 548      | YYGYTGAFR          |           |         |                                           |      | Mascot |      |
| 1104.4739           | 1104.3842   | -0.0897 | -81   | 531        | 539      | ECVPNSNER          |           |         | Carbamidomethyl (C)[2]                    |      | Mascot |      |
| 1156.5316           | 1156.4103   | -0.1213 | -105  | 366        | 374      | WCAIGHQER          |           |         | Carbamidomethyl (C)[2]                    |      | Mascot |      |
| 1156.5316           | 1156.4103   | -0.1213 | -105  | 366        | 374      | WCAIGHQER          | 65        | 99.906  | Carbamidomethyl (C)[2]                    |      | Mascot |      |
| 1251.6262           | 1251.4987   | -0.1275 | -102  | 38         | 47       | CASFRENVL R        |           |         | Carbamidomethyl (C)[1]                    |      | Mascot |      |
| 1346.6157           | 1346.4819   | -0.1338 | -99   | 27         | 37       | WCTISTHEANK        |           |         | Carbamidomethyl (C)[2]                    |      | Mascot |      |
| 1354.6056           | 1354.4659   | -0.1397 | -103  | 245        | 255      | NYELLCGDNTR        |           |         | Carbamidomethyl (C)[6]                    |      | Mascot |      |
| 1447.6594           | 1447.5092   | -0.1502 | -104  | 527        | 539      | GTGKCVPN SNER      |           |         | Carbamidomethyl (C)[6]                    |      | Mascot |      |
| 1482.7006           | 1482.5701   | -0.1305 | -88   | 245        | 256      | NYELLCGDNTRK       |           |         | Carbamidomethyl (C)[6]                    |      | Mascot |      |
| 1510.743            | 1510.5862   | -0.1568 | -104  | 595        | 607      | KPVTDAENCHLAR      |           |         | Carbamidomethyl (C)[9]                    |      | Mascot |      |
| 1640.7664           | 1640.6005   | -0.1659 | -101  | 230        | 243      | HSTVFDNLPN PEDR    | 27        | 0       |                                           |      | Mascot |      |
| 1640.7664           | 1640.6005   | -0.1659 | -101  | 230        | 243      | HSTVFDNLPN PEDR    |           |         | Carbamidomethyl (C)[9]                    |      | Mascot |      |
| 1644.7111           | 1644.5482   | -0.1629 | -99   | 499        | 513      | FDEFFSAGCAPGSPR    |           |         |                                           |      | Mascot |      |
| 1768.8613           | 1768.6768   | -0.1845 | -104  | 230        | 244      | HSTVFDNLPN PEDRK   |           |         |                                           |      | Mascot |      |
| 1880.7731           | 1880.7297   | -0.0434 | -23   | 200        | 216      | CACSNHEPYFGYSGAFK  |           |         |                                           |      | Mascot |      |
| 1939.9403           | 1939.7375   | -0.2028 | -105  | 591        | 607      | DGTRKPVTD AENCHLAR |           |         | Carbamidomethyl (C)[13]                   |      | Mascot |      |
| 1994.8159           | 1994.6121   | -0.2038 | -102  | 200        | 216      | CACSNHEPYFGYSGAFK  |           |         | Carbamidomethyl (C)[1.3]                  |      | Mascot |      |
| 2274.0066           | 2273.7654   | -0.2412 | -106  | 494        | 513      | INCKFDEFFSAGCAPGS  | 109       | 100     | Carbamidomethyl (C)[4,14]                 |      | Mascot |      |
|                     |             |         |       |            |          | PR                 |           |         |                                           |      |        |      |
| 2274.0066           | 2273.7654   | -0.2412 | -106  | 494        | 513      | INCKFDEFFSAGCAPGS  |           |         | Carbamidomethyl (C)[4,14]                 |      | Mascot |      |
|                     |             |         |       |            |          | PR                 |           |         |                                           |      |        |      |
| 2410.1165           | 2409.8704   | -0.2461 | -102  | 257        | 277      | SVDDYQECYLAMVPSHA  |           |         | Carbamidomethyl (C)[8]                    |      | Mascot |      |
|                     |             |         |       |            |          | VVAR               |           |         |                                           |      |        |      |
| 2426.1116           | 2425.8625   | -0.2491 | -103  | 257        | 277      | SVDDYQECYLAMVPSHA  |           |         | Carbamidomethyl (C)[8], Oxidation (M)[12] |      | Mascot |      |
|                     |             |         |       |            |          | VVAR               |           |         |                                           |      |        |      |
| 2538.2114           | 2537.9512   | -0.2602 | -103  | 256        | 277      | KSVDDYQECYLAMVPSH  |           |         | Carbamidomethyl (C)[9]                    |      | Mascot |      |
|                     |             |         |       |            |          | AVVAR              |           |         |                                           |      |        |      |
| 2554.2065           | 2553.9509   | -0.2556 | -100  | 256        | 277      | KSVDDYQECYLAMVPSH  |           |         | Carbamidomethyl (C)[9], Oxidation (M)[13] |      | Mascot |      |
|                     |             |         |       |            |          | AVVAR              |           |         |                                           |      |        |      |

|                |              |          |                        |  |                |            |                  |               |                     |                   |
|----------------|--------------|----------|------------------------|--|----------------|------------|------------------|---------------|---------------------|-------------------|
| Gel Idx/Pos    |              | 17/A6    | Instr/Gel Origin       |  | AB4700/110211A |            | Process Status   |               | Analysis Succeeded  |                   |
| Plate [#] Name |              | [1] 8907 | Instrument Sample Name |  |                |            | Spectra          |               | 8                   |                   |
| Rank           | Protein Name |          | Species                |  | Accession No.  | Protein MW | Protein PI Count | Protein Score | Protein Total Score | Total Ion C. I. % |

| 1                   | protein disulfide-isomerase A3 [Ovis aries]                                                            | gi 251823897 | 56979.9 | 6.23       | 22       | 731                | 100       | 536     | 100              |      |             |
|---------------------|--------------------------------------------------------------------------------------------------------|--------------|---------|------------|----------|--------------------|-----------|---------|------------------|------|-------------|
| Peptide Information |                                                                                                        |              |         |            |          |                    |           |         |                  |      |             |
| Calc. Mass          | Obsrv. Mass                                                                                            | ± da         | ± ppm   | Start Seq. | End Seq. | Sequence           | Ion Score | C. I. % | Modification     | Rank | Result Type |
| 900.5049            | 900.427                                                                                                | -0.0779      | -87     | 297        | 304      | LHFAVASR           | 59        | 99.533  |                  |      | Mascot      |
| 1028.6              | 1028.515                                                                                               | -0.085       | -83     | 296        | 304      | KLHFAVASR          |           |         |                  |      | Mascot      |
| 1028.6              | 1028.515                                                                                               | -0.085       | -83     | 297        | 305      | LHFAVASRK          |           |         |                  |      | Mascot      |
| 1084.5674           | 1084.4626                                                                                              | -0.1048      | -97     | 95         | 104      | YGVSGYPTLK         | 41        | 67.76   |                  |      | Mascot      |
| 1172.5404           | 1172.4408                                                                                              | -0.0996      | -85     | 336        | 344      | FVMQEEFSR          |           |         |                  |      | Mascot      |
| 1172.5404           | 1172.4408                                                                                              | -0.0996      | -85     | 336        | 344      | FVMQEEFSR          |           |         |                  |      | Mascot      |
| 1179.5865           | 1179.486                                                                                               | -0.1005      | -85     | 174        | 183      | AASNLRDNYR         |           |         | Oxidation (M)[3] |      | Mascot      |
| 1188.5354           | 1188.4244                                                                                              | -0.111       | -93     | 336        | 344      | FVMQEEFSR          |           |         |                  |      | Mascot      |
| 1191.6005           | 1191.4978                                                                                              | -0.1027      | -86     | 63         | 73       | LAPEVEAAATR        |           |         |                  |      | Mascot      |
| 1252.5076           | 1252.4052                                                                                              | -0.1024      | -82     | 108        | 119      | DGEESGAYDGPR       |           |         |                  |      | Mascot      |
| 1319.6953           | 1319.5875                                                                                              | -0.1078      | -82     | 62         | 73       | KLAPEYEAATR        |           |         |                  |      | Mascot      |
| 1341.6837           | 1341.5596                                                                                              | -0.1241      | -92     | 449        | 460      | GFPTVFSPPANK       |           |         |                  |      | Mascot      |
| 1368.6642           | 1368.6487                                                                                              | -0.0155      | -11     | 367        | 379      | SEPIESNDGPVK       | 60        | 99.606  |                  |      | Mascot      |
| 1370.7314           | 1370.6189                                                                                              | -0.1125      | -82     | 472        | 482      | ELSDFSYLKR         |           |         |                  |      | Mascot      |
| 1370.7314           | 1370.6189                                                                                              | -0.1125      | -82     | 472        | 482      | ELSDFSYLKR         |           |         |                  |      | Mascot      |
| 1422.6899           | 1422.5893                                                                                              | -0.1206      | -85     | 162        | 173      | DLFSEAHSEFLK       |           |         |                  |      | Mascot      |
| 1469.7787           | 1469.6512                                                                                              | -0.1275      | -87     | 449        | 461      | GFPTVFSPPANKK      |           |         |                  |      | Mascot      |
| 1472.6838           | 1472.5651                                                                                              | -0.1187      | -81     | 336        | 347      | FVMQEEFSRDGK       |           |         |                  |      | Mascot      |
| 1488.6787           | 1488.55                                                                                                | -0.1287      | -86     | 336        | 347      | FVMQEEFSRDGK       | 110       | 100     | Oxidation (M)[3] |      | Mascot      |
| 1516.743            | 1516.6145                                                                                              | -0.1285      | -85     | 352        | 363      | FLEDYFDGNLKR       |           |         |                  |      | Mascot      |
| 1516.743            | 1516.6145                                                                                              | -0.1285      | -85     | 352        | 363      | FLEDYFDGNLKR       |           |         |                  |      | Mascot      |
| 1579.8326           | 1579.693                                                                                               | -0.1396      | -88     | 483        | 496      | EATNPVIOEEKPK      |           |         |                  |      | Mascot      |
| 1619.7839           | 1619.6466                                                                                              | -0.1373      | -85     | 259        | 271      | DLLIAYVDVYEK       |           |         |                  |      | Mascot      |
| 1664.7584           | 1664.618                                                                                               | -0.1404      | -84     | 434        | 448      | MDATANDVPSPYEVR    |           |         |                  |      | Mascot      |
| 1668.7612           | 1668.6198                                                                                              | -0.1414      | -85     | 105        | 119      | IFRDGEESGAYDGPR    | 58        | 99.348  |                  |      | Mascot      |
| 1668.7612           | 1668.6198                                                                                              | -0.1414      | -85     | 105        | 119      | IFRDGEESGAYDGPR    |           |         |                  |      | Mascot      |
| 1668.7612           | 1668.6198                                                                                              | -0.1414      | -85     | 105        | 119      | IFRDGEESGAYDGPR    |           |         |                  |      | Mascot      |
| 1680.7534           | 1680.609                                                                                               | -0.1444      | -86     | 434        | 448      | MDATANDVPSPYEVR    |           |         | Oxidation (M)[1] |      | Mascot      |
| 2591.2988           | 2591.0686                                                                                              | -0.2302      | -89     | 306        | 329      | TFSHELSDFGLESTTGEI |           |         |                  |      | Mascot      |
|                     |                                                                                                        |              |         |            |          | PVVAVR             |           |         |                  |      |             |
| 2591.2988           | 2591.0686                                                                                              | -0.2302      | -89     | 306        | 329      | TFSHELSDFGLESTTGEI | 101       | 100     |                  |      | Mascot      |
|                     |                                                                                                        |              |         |            |          | PVVAVR             |           |         |                  |      |             |
| 2719.3938           | 2719.1484                                                                                              | -0.2454      | -90     | 305        | 329      | KTFSHELSDFGLESTTGE | 109       | 100     |                  |      | Mascot      |
|                     |                                                                                                        |              |         |            |          | IPVVAVR            |           |         |                  |      |             |
| 2719.3938           | 2719.1484                                                                                              | -0.2454      | -90     | 305        | 329      | KTFSHELSDFGLESTTGE |           |         |                  |      | Mascot      |
|                     |                                                                                                        |              |         |            |          | IPVVAVR            |           |         |                  |      |             |
| 2                   | RecName: Full=Protein disulfide-isomerase A3;<br>AltName: Full=58 kDa glucose-regulated protein; AltNa | gi 729433    | 56893.9 | 6.23       | 21       | 668                | 100       | 478     | 100              |      |             |
| Peptide Information |                                                                                                        |              |         |            |          |                    |           |         |                  |      |             |
| Calc. Mass          | Obsrv. Mass                                                                                            | ± da         | ± ppm   | Start Seq. | End Seq. | Sequence           | Ion Score | C. I. % | Modification     | Rank | Result Type |
| 900.5049            | 900.427                                                                                                | -0.0779      | -87     | 297        | 304      | LHFAVASR           | 3         | 0       |                  |      | Mascot      |
| 1028.6              | 1028.515                                                                                               | -0.085       | -83     | 297        | 305      | LHFAVASRK          |           |         |                  |      | Mascot      |
| 1028.6              | 1028.515                                                                                               | -0.085       | -83     | 297        | 305      | LHFAVASRK          |           |         |                  |      | Mascot      |
| 1084.5674           | 1084.4626                                                                                              | -0.1048      | -97     | 95         | 104      | YGVSGYPTLK         | 41        | 67.76   |                  |      | Mascot      |
| 1172.5404           | 1172.4408                                                                                              | -0.0996      | -85     | 336        | 344      | FVMQEEFSR          |           |         |                  |      | Mascot      |
| 1172.5404           | 1172.4408                                                                                              | -0.0996      | -85     | 336        | 344      | FVMQEEFSR          |           |         |                  |      | Mascot      |
| 1179.5865           | 1179.486                                                                                               | -0.1005      | -85     | 174        | 183      | AASNLRDNYR         |           |         | Oxidation (M)[3] |      | Mascot      |
| 1188.5354           | 1188.4244                                                                                              | -0.111       | -93     | 336        | 344      | FVMQEEFSR          |           |         |                  |      | Mascot      |
| 1191.6005           | 1191.4978                                                                                              | -0.1027      | -86     | 63         | 73       | LAPEVEAAATR        |           |         |                  |      | Mascot      |
| 1252.5076           | 1252.4052                                                                                              | -0.1024      | -82     | 108        | 119      | DGEESGAYDGPR       |           |         |                  |      | Mascot      |
| 1319.6953           | 1319.5875                                                                                              | -0.1078      | -82     | 62         | 73       | KLAPEYEAATR        |           |         |                  |      | Mascot      |
| 1341.6837           | 1341.5596                                                                                              | -0.1241      | -92     | 449        | 460      | GFPTVFSPPANK       |           |         |                  |      | Mascot      |
| 1368.6642           | 1368.6487                                                                                              | -0.0155      | -11     | 367        | 379      | SEPIESNDGPVK       | 60        | 99.606  |                  |      | Mascot      |
| 1370.7314           | 1370.6189                                                                                              | -0.1125      | -82     | 472        | 482      | ELSDFSYLKR         |           |         |                  |      | Mascot      |
| 1370.7314           | 1370.6189                                                                                              | -0.1125      | -82     | 472        | 482      | ELSDFSYLKR         |           |         |                  |      | Mascot      |
| 1422.6899           | 1422.5893                                                                                              | -0.1206      | -85     | 162        | 173      | DLFSEAHSEFLK       |           |         |                  |      | Mascot      |
| 1469.7787           | 1469.6512                                                                                              | -0.1275      | -87     | 449        | 461      | GFPTVFSPPANKK      |           |         |                  |      | Mascot      |
| 1472.6838           | 1472.5651                                                                                              | -0.1187      | -81     | 336        | 347      | FVMQEEFSRDGK       |           |         |                  |      | Mascot      |
| 1488.6787           | 1488.55                                                                                                | -0.1287      | -86     | 336        | 347      | FVMQEEFSRDGK       | 110       | 100     | Oxidation (M)[3] |      | Mascot      |
| 1516.743            | 1516.6145                                                                                              | -0.1285      | -85     | 352        | 363      | FLEDYFDGNLKR       |           |         |                  |      | Mascot      |
| 1516.743            | 1516.6145                                                                                              | -0.1285      | -85     | 352        | 363      | FLEDYFDGNLKR       |           |         |                  |      | Mascot      |
| 1579.8326           | 1579.693                                                                                               | -0.1396      | -88     | 483        | 496      | EATNPVIOEEKPK      |           |         |                  |      | Mascot      |
| 1619.7839           | 1619.6466                                                                                              | -0.1373      | -85     | 259        | 271      | DLLIAYVDVYEK       |           |         |                  |      | Mascot      |
| 1664.7584           | 1664.618                                                                                               | -0.1404      | -84     | 434        | 448      | MDATANDVPSPYEVR    |           |         |                  |      | Mascot      |
| 1668.7612           | 1668.6198 #                                                                                            | -0.1414      | -85     | 105        | 119      | IFRDGEESGAYDGPR    | 58        | 99.348  |                  |      | Mascot      |
| 1668.7612           | 1668.6198                                                                                              | -0.1414      | -85     | 105        | 119      | IFRDGEESGAYDGPR    |           |         |                  |      | Mascot      |
| 1668.7612           | 1668.6198                                                                                              | -0.1414      | -85     | 105        | 119      | IFRDGEESGAYDGPR    |           |         |                  |      | Mascot      |
| 1680.7534           | 1680.609                                                                                               | -0.1444      | -86     | 434        | 448      | MDATANDVPSPYEVR    |           |         | Oxidation (M)[1] |      | Mascot      |
| 2591.2988           | 2591.0686                                                                                              | -0.2302      | -89     | 306        | 329      | TFSHELSDFGLESTTGEI |           |         |                  |      | Mascot      |
|                     |                                                                                                        |              |         |            |          | PVVAVR             |           |         |                  |      |             |
| 2591.2988           | 2591.0686                                                                                              | -0.2302      | -89     | 306        | 329      | TFSHELSDFGLESTTGEI | 101       | 100     |                  |      | Mascot      |
|                     |                                                                                                        |              |         |            |          | PVVAVR             |           |         |                  |      |             |
| 2719.3938           | 2719.1484                                                                                              | -0.2454      | -90     | 305        | 329      | KTFSHELSDFGLESTTGE | 109       | 100     |                  |      | Mascot      |
|                     |                                                                                                        |              |         |            |          | IPVVAVR            |           |         |                  |      |             |
| 2719.3938           | 2719.1484                                                                                              | -0.2454      | -90     | 305        | 329      | KTFSHELSDFGLESTTGE |           |         |                  |      | Mascot      |
|                     |                                                                                                        |              |         |            |          | IPVVAVR            |           |         |                  |      |             |
| 3                   | RecName: Full=Protein disulfide-isomerase A3                                                           | gi 298351769 | 23373.5 | 4.75       | 7        | 240                | 100       | 185     | 100              |      |             |
| Peptide Information |                                                                                                        |              |         |            |          |                    |           |         |                  |      |             |
| Calc. Mass          | Obsrv. Mass                                                                                            | ± da         | ± ppm   | Start Seq. | End Seq. | Sequence           | Ion Score | C. I. % | Modification     | Rank | Result Type |
| 1084.5674           | 1084.4626                                                                                              | -0.1048      | -97     | 13         | 22       | YGVSGYPTLK         | 41        | 67.76   |                  |      | Mascot      |
| 1172.5404           | 1172.4408                                                                                              | -0.0996      | -85     | 144        | 152      | FVMQEEFSR          |           |         |                  |      | Mascot      |
| 1172.5404           | 1172.4408                                                                                              | -0.0996      | -85     | 144        | 152      | FVMQEEFSR          |           |         |                  |      | Mascot      |
| 1188.5354           | 1188.4244                                                                                              | -0.111       | -93     | 144        | 152      | FVMQEEFSR          |           |         | Oxidation (M)[3] |      | Mascot      |
| 1191.6005           | 1191.4978                                                                                              | -0.1027      | -86     | 2          | 12       | LAPEVEAAATR        |           |         |                  |      | Mascot      |
| 1341.6837           | 1341.5596                                                                                              | -0.1241      | -92     | 196        | 207      | GFPTVFSPPANK       |           |         |                  |      | Mascot      |
| 1469.7787           | 1469.6512                                                                                              | -0.1275      | -87     | 196        | 208      | GFPTVFSPPANKK      |           |         |                  |      | Mascot      |
| 2591.2988           | 2591.0686                                                                                              | -0.2302      | -89     | 120        | 143      | TFSHELSDFGLESTTGEV |           |         |                  |      | Mascot      |
|                     |                                                                                                        |              |         |            |          | PVVAVR             |           |         |                  |      |             |
| 2591.2988           | 2591.0686                                                                                              | -0.2302      | -89     | 120        | 143      | TFSHELSDFGLESTTGEV | 72        | 99.979  |                  |      | Mascot      |
|                     |                                                                                                        |              |         |            |          | PVVAVR             |           |         |                  |      |             |
| 2719.3938           | 2719.1484                                                                                              | -0.2454      | -90     | 119        | 143      | KTFSHELSDFGLESTTGE | 72        | 99.975  |                  |      | Mascot      |
|                     |                                                                                                        |              |         |            |          | VPVVAVR            |           |         |                  |      |             |
| 2719.3938           | 2719.1484                                                                                              | -0.2454      | -90     | 119        | 143      | KTFSHELSDFGLESTTGE |           |         |                  |      | Mascot      |
|                     |                                                                                                        |              |         |            |          | VPVVAVR            |           |         |                  |      |             |
| 4                   | unnamed protein product [Mus musculus]                                                                 | gi 74143892  | 55392.9 | 5.53       | 9        | 234                | 100       | 185     | 100              |      |             |
| Peptide Information |                                                                                                        |              |         |            |          |                    |           |         |                  |      |             |
| Calc. Mass          | Obsrv. Mass                                                                                            | ± da         | ± ppm   | Start Seq. | End Seq. | Sequence           | Ion Score | C. I. % | Modification     | Rank | Result Type |
| 1084.5674           | 1084.4626                                                                                              | -0.1048      | -97     | 95         | 104      | YGVSGYPTLK         | 41        | 67.76   |                  |      | Mascot      |
| 1172.5404           | 1172.4408                                                                                              | -0.0996      | -85     | 336        | 344      | FVMQEEFSR          |           |         |                  |      | Mascot      |
| 1172.5404           | 1172.4408                                                                                              | -0.0996      | -85     | 336        | 344      | FVMQEEFSR          |           |         |                  |      | Mascot      |
| 1179.5865           | 1179.486                                                                                               | -0.1005      | -85     | 174        | 183      | AASNLRDNYR         |           |         | Oxidation (M)[3] |      | Mascot      |
| 1188.5354           | 1188.4244                                                                                              | -0.111       | -93     | 336        | 344      | FVMQEEFSR          |           |         |                  |      | Mascot      |
| 1191.6005           | 1191.4978                                                                                              | -0.1027      | -86     | 63         | 73       | LAPEVEAAATR        |           |         |                  |      | Mascot      |
| 1341.6837           | 1341.5596                                                                                              | -0.1241      | -92     | 449        | 460      | GFPTVFSPPANK       |           |         |                  |      | Mascot      |
| 1469.7787           | 1469.6512                                                                                              | -0.1275      | -87     | 449        | 461      | GFPTVFSPPANKK      |           |         |                  |      | Mascot      |
| 1472.6838           | 1472.5651                                                                                              | -0.1187      | -81     | 336        | 347      | FVMQEEFSRDGK       |           |         |                  |      | Mascot      |
| 1488.6787           | 1488.55                                                                                                | -0.1287      | -8      |            |          |                    |           |         |                  |      |             |

|                     |                                                         | Peptide Information |             |         |       |            |          |                    |           |              |                  | Rank | Result Type |     |     |     |     |  |
|---------------------|---------------------------------------------------------|---------------------|-------------|---------|-------|------------|----------|--------------------|-----------|--------------|------------------|------|-------------|-----|-----|-----|-----|--|
|                     |                                                         | Calc. Mass          | Obsrv. Mass | ± da    | ± ppm | Start Seq. | End Seq. | Sequence           | Ion Score | C. I. %      | Modification     |      |             |     |     |     |     |  |
|                     |                                                         | 1084.5674           | 1084.4626   | -0.1048 | -97   | 95         | 104      | YGVSGYPTLK         | 41        | 67.76        |                  |      | Mascot      |     |     |     |     |  |
|                     |                                                         | 1172.5404           | 1172.4408   | -0.0996 | -85   | 336        | 344      | FVMQEEFSR          |           |              |                  |      | Mascot      |     |     |     |     |  |
|                     |                                                         | 1172.5404           | 1172.4408   | -0.0996 | -85   | 336        | 344      | FVMQEEFSR          |           |              |                  |      | Mascot      |     |     |     |     |  |
|                     |                                                         | 1179.5865           | 1179.486    | -0.1005 | -85   | 174        | 183      | AASNLRDNYR         |           |              | Oxidation (M)[3] |      | Mascot      |     |     |     |     |  |
|                     |                                                         | 1188.5354           | 1188.4244   | -0.1111 | -93   | 336        | 344      | FVMQEEFSR          |           |              |                  |      | Mascot      |     |     |     |     |  |
|                     |                                                         | 1191.6005           | 1191.4978   | -0.1027 | -86   | 63         | 73       | LAPEYAAATR         |           |              |                  |      | Mascot      |     |     |     |     |  |
|                     |                                                         | 1341.6837           | 1341.5596   | -0.1241 | -92   | 449        | 460      | GFPTVFSANK         |           |              |                  |      | Mascot      |     |     |     |     |  |
|                     |                                                         | 1469.7787           | 1469.6512   | -0.1275 | -87   | 449        | 461      | GFPTVFSANKK        |           |              |                  |      | Mascot      |     |     |     |     |  |
|                     |                                                         | 1472.6838           | 1472.5651   | -0.1187 | -81   | 336        | 347      | FVMQEEFSRDGK       |           |              |                  |      | Mascot      |     |     |     |     |  |
|                     |                                                         | 1488.6787           | 1488.55     | -0.1287 | -86   | 336        | 347      | FVMQEEFSRDGK       |           |              | Oxidation (M)[3] |      | Mascot      |     |     |     |     |  |
|                     |                                                         | 2591.2988           | 2591.0686   | -0.2302 | -89   | 306        | 329      | TFSHELSDFGLESTTGEV |           |              |                  |      | Mascot      |     |     |     |     |  |
|                     |                                                         |                     |             |         |       |            |          | PVVAIR             |           |              |                  |      |             |     |     |     |     |  |
|                     |                                                         | 2591.2988           | 2591.0686   | -0.2302 | -89   | 306        | 329      | TFSHELSDFGLESTTGEV | 72        | 99.979       |                  |      | Mascot      |     |     |     |     |  |
|                     |                                                         |                     |             |         |       |            |          | PVVAIR             |           |              |                  |      |             |     |     |     |     |  |
|                     |                                                         | 2719.3938           | 2719.1484   | -0.2454 | -90   | 305        | 329      | KTFSHELSDFGLESTTGE |           |              |                  |      | Mascot      |     |     |     |     |  |
|                     |                                                         |                     |             |         |       |            |          | VPVVAIR            | 72        | 99.975       |                  |      | Mascot      |     |     |     |     |  |
|                     |                                                         | 2719.3938           | 2719.1484   | -0.2454 | -90   | 305        | 329      | KTFSHELSDFGLESTTGE |           |              |                  |      | Mascot      |     |     |     |     |  |
|                     |                                                         |                     |             |         |       |            |          | VPVVAIR            |           |              |                  |      |             |     |     |     |     |  |
| 6                   | Chain A, TapasinERP57 HETERODIMER                       |                     |             |         |       |            |          |                    |           | gj1220702506 | 54199.2          | 5.61 | 13          | 182 | 100 | 100 | 100 |  |
| Peptide Information |                                                         |                     |             |         |       |            |          |                    |           |              |                  |      |             |     |     |     |     |  |
|                     |                                                         | Calc. Mass          | Obsrv. Mass | ± da    | ± ppm | Start Seq. | End Seq. | Sequence           | Ion Score | C. I. %      | Modification     | Rank | Result Type |     |     |     |     |  |
|                     |                                                         | Calc. Mass          | Obsrv. Mass | ± da    | ± ppm | Start Seq. | End Seq. | Sequence           | Ion Score | C. I. %      | Modification     |      |             |     |     |     |     |  |
|                     |                                                         | 1084.5674           | 1084.4626   | -0.1048 | -97   | 71         | 80       | YGVSGYPTLK         | 41        | 67.76        |                  |      | Mascot      |     |     |     |     |  |
|                     |                                                         | 1172.5404           | 1172.4408   | -0.0996 | -85   | 312        | 320      | FVMQEEFSR          |           |              |                  |      | Mascot      |     |     |     |     |  |
|                     |                                                         | 1172.5404           | 1172.4408   | -0.0996 | -85   | 312        | 320      | FVMQEEFSR          |           |              |                  |      | Mascot      |     |     |     |     |  |
|                     |                                                         | 1179.5865           | 1179.486    | -0.1005 | -85   | 150        | 159      | AASNLRDNYR         |           |              | Oxidation (M)[3] |      | Mascot      |     |     |     |     |  |
|                     |                                                         | 1188.5354           | 1188.4244   | -0.1111 | -93   | 312        | 320      | FVMQEEFSR          |           |              |                  |      | Mascot      |     |     |     |     |  |
|                     |                                                         | 1191.6005           | 1191.4978   | -0.1027 | -86   | 39         | 49       | LAPEYAAATR         |           |              |                  |      | Mascot      |     |     |     |     |  |
|                     |                                                         | 1341.6837           | 1341.5596   | -0.1241 | -92   | 425        | 436      | GFPTVFSANK         |           |              |                  |      | Mascot      |     |     |     |     |  |
|                     |                                                         | 1368.6642           | 1368.6487   | -0.0155 | -11   | 343        | 354      | SEPIPESNDGPVK      |           |              |                  |      | Mascot      |     |     |     |     |  |
|                     |                                                         | 1370.6951           | 1370.6189   | -0.0762 | -56   | 448        | 458      | ELSDFISYLQR        |           | 60           | 99.606           |      | Mascot      |     |     |     |     |  |
|                     |                                                         | 1370.6951           | 1370.6189   | -0.0762 | -56   | 448        | 458      | ELSDFISYLQR        |           |              |                  |      | Mascot      |     |     |     |     |  |
|                     |                                                         | 1469.7787           | 1469.6512   | -0.1275 | -87   | 425        | 437      | GFPTVFSANKK        |           |              |                  |      | Mascot      |     |     |     |     |  |
|                     |                                                         | 1472.6838           | 1472.5651   | -0.1187 | -81   | 312        | 323      | FVMQEEFSRDGK       |           |              | Oxidation (M)[3] |      | Mascot      |     |     |     |     |  |
|                     |                                                         | 1488.6787           | 1488.55     | -0.1287 | -86   | 312        | 323      | FVMQEEFSRDGK       |           |              |                  |      | Mascot      |     |     |     |     |  |
|                     |                                                         | 1579.8326           | 1579.693    | -0.1396 | -88   | 459        | 472      | EATNPVIGEEKPK      |           |              |                  |      | Mascot      |     |     |     |     |  |
|                     |                                                         | 1619.7839           | 1619.6466   | -0.1373 | -85   | 235        | 247      | DLLIAYVDYDEK       |           |              |                  |      | Mascot      |     |     |     |     |  |
|                     |                                                         | 1639.7446           | 1639.6104   | -0.1342 | -82   | 1          | 14       | SDVLELTDNFEFR      |           |              |                  |      | Mascot      |     |     |     |     |  |
|                     |                                                         | 1664.7584           | 1664.618    | -0.1404 | -84   | 410        | 424      | MDATANDVPSPEYVR    |           |              |                  |      | Mascot      |     |     |     |     |  |
|                     |                                                         | 1680.7534           | 1680.609    | -0.1444 | -86   | 410        | 424      | MDATANDVPSPEYVR    |           |              | Oxidation (M)[1] |      | Mascot      |     |     |     |     |  |
|                     | unnamed protein product [Homo sapiens]                  |                     |             |         |       |            |          |                    |           |              |                  |      |             |     |     |     |     |  |
|                     |                                                         |                     |             |         |       |            |          |                    |           |              |                  |      |             |     |     |     |     |  |
|                     |                                                         |                     |             |         |       |            |          |                    |           |              |                  |      |             |     |     |     |     |  |
| Peptide Information |                                                         |                     |             |         |       |            |          |                    |           |              |                  |      |             |     |     |     |     |  |
|                     |                                                         | Calc. Mass          | Obsrv. Mass | ± da    | ± ppm | Start Seq. | End Seq. | Sequence           | Ion Score | C. I. %      | Modification     | Rank | Result Type |     |     |     |     |  |
|                     |                                                         | Calc. Mass          | Obsrv. Mass | ± da    | ± ppm | Start Seq. | End Seq. | Sequence           | Ion Score | C. I. %      | Modification     |      |             |     |     |     |     |  |
|                     |                                                         | 1084.5674           | 1084.4626   | -0.1048 | -97   | 70         | 79       | YGVSGYPTLK         | 41        | 67.76        |                  |      | Mascot      |     |     |     |     |  |
|                     |                                                         | 1172.5404           | 1172.4408   | -0.0996 | -85   | 311        | 319      | FVMQEEFSR          |           |              |                  |      | Mascot      |     |     |     |     |  |
|                     |                                                         | 1172.5404           | 1172.4408   | -0.0996 | -85   | 311        | 319      | FVMQEEFSR          |           |              |                  |      | Mascot      |     |     |     |     |  |
|                     |                                                         | 1179.5865           | 1179.486    | -0.1005 | -85   | 149        | 158      | AASNLRDNYR         |           |              | Oxidation (M)[3] |      | Mascot      |     |     |     |     |  |
|                     |                                                         | 1188.5354           | 1188.4244   | -0.1111 | -93   | 311        | 319      | FVMQEEFSR          |           |              |                  |      | Mascot      |     |     |     |     |  |
|                     |                                                         | 1191.6005           | 1191.4978   | -0.1027 | -86   | 38         | 48       | LAPEYAAATR         |           |              |                  |      | Mascot      |     |     |     |     |  |
|                     |                                                         | 1341.6837           | 1341.5596   | -0.1241 | -92   | 424        | 435      | GFPTVFSANK         |           |              |                  |      | Mascot      |     |     |     |     |  |
|                     |                                                         | 1368.6642           | 1368.6487   | -0.0155 | -11   | 342        | 354      | SEPIPESNDGPVK      |           | 60           | 99.606           |      | Mascot      |     |     |     |     |  |
|                     |                                                         | 1370.6951           | 1370.6189   | -0.0762 | -56   | 447        | 457      | ELSDFISYLQR        |           |              |                  |      | Mascot      |     |     |     |     |  |
|                     |                                                         | 1370.6951           | 1370.6189   | -0.0762 | -56   | 447        | 457      | ELSDFISYLQR        |           |              |                  |      | Mascot      |     |     |     |     |  |
|                     |                                                         | 1469.7787           | 1469.6512   | -0.1275 | -87   | 424        | 436      | GFPTVFSANKK        |           |              |                  |      | Mascot      |     |     |     |     |  |
|                     |                                                         | 1472.6838           | 1472.5651   | -0.1187 | -81   | 311        | 322      | FVMQEEFSRDGK       |           |              | Oxidation (M)[3] |      | Mascot      |     |     |     |     |  |
|                     |                                                         | 1488.6787           | 1488.55     | -0.1287 | -86   | 311        | 322      | FVMQEEFSRDGK       |           |              |                  |      | Mascot      |     |     |     |     |  |
|                     |                                                         | 1579.8326           | 1579.693    | -0.1396 | -88   | 458        | 471      | EATNPVIGEEKPK      |           |              |                  |      | Mascot      |     |     |     |     |  |
|                     |                                                         | 1619.7839           | 1619.6466   | -0.1373 | -85   | 234        | 246      | DLLIAYVDYDEK       |           |              |                  |      | Mascot      |     |     |     |     |  |
|                     |                                                         | 1652.037            | 1652.0835   | 0.0465  | 28    | 5          | 20       | RLALFPGVALLAAAR    |           |              |                  |      | Mascot      |     |     |     |     |  |
|                     |                                                         | 1664.7584           | 1664.618    | -0.1404 | -84   | 409        | 423      | MDATANDVPSPEYVR    |           |              |                  |      | Mascot      |     |     |     |     |  |
|                     |                                                         | 1680.7534           | 1680.609    | -0.1444 | -86   | 409        | 423      | MDATANDVPSPEYVR    |           |              | Oxidation (M)[1] |      | Mascot      |     |     |     |     |  |
|                     | protein disulfide-isomerase A3 precursor [Homo sapiens] |                     |             |         |       |            |          |                    |           |              |                  |      |             |     |     |     |     |  |
|                     |                                                         |                     |             |         |       |            |          |                    |           |              |                  |      |             |     |     |     |     |  |
|                     |                                                         |                     |             |         |       |            |          |                    |           |              |                  |      |             |     |     |     |     |  |
| Peptide Information |                                                         |                     |             |         |       |            |          |                    |           |              |                  |      |             |     |     |     |     |  |
|                     |                                                         | Calc. Mass          | Obsrv. Mass | ± da    | ± ppm | Start Seq. | End Seq. | Sequence           | Ion Score | C. I. %      | Modification     | Rank | Result Type |     |     |     |     |  |
|                     |                                                         | Calc. Mass          | Obsrv. Mass | ± da    | ± ppm | Start Seq. | End Seq. | Sequence           | Ion Score | C. I. %      | Modification     |      |             |     |     |     |     |  |
|                     |                                                         | 1084.5674           | 1084.4626   | -0.1048 | -97   | 95         | 104      | YGVSGYPTLK         | 41        | 67.76        |                  |      | Mascot      |     |     |     |     |  |
|                     |                                                         | 1172.5404           | 1172.4408   | -0.0996 | -85   | 336        | 344      | FVMQEEFSR          |           |              |                  |      | Mascot      |     |     |     |     |  |
|                     |                                                         | 1172.5404           | 1172.4408   | -0.0996 | -85   | 336        | 344      | FVMQEEFSR          |           |              |                  |      | Mascot      |     |     |     |     |  |
|                     |                                                         | 1179.5865           | 1179.486    | -0.1005 | -85   | 174        | 183      | AASNLRDNYR         |           |              | Oxidation (M)[3] |      | Mascot      |     |     |     |     |  |
|                     |                                                         | 1188.5354           | 1188.4244   | -0.1111 | -93   | 336        | 344      | FVMQEEFSR          |           |              |                  |      | Mascot      |     |     |     |     |  |
|                     |                                                         | 1191.6005           | 1191.4978   | -0.1027 | -86   | 63         | 73       | LAPEYAAATR         |           |              |                  |      | Mascot      |     |     |     |     |  |
|                     |                                                         | 1341.6837           | 1341.5596   | -0.1241 | -92   | 449        | 460      | GFPTVFSANK         |           |              |                  |      | Mascot      |     |     |     |     |  |
|                     |                                                         | 1368.6642           | 1368.6487   | -0.0155 | -11   | 367        | 379      | SEPIPESNDGPVK      |           | 60           | 99.606           |      | Mascot      |     |     |     |     |  |
|                     |                                                         | 1370.6951           | 1370.6189   | -0.0762 | -56   | 472        | 482      | ELSDFISYLQR        |           |              |                  |      | Mascot      |     |     |     |     |  |
|                     |                                                         | 1370.6951           | 1370.6189   | -0.0762 | -56   | 472        | 482      | ELSDFISYLQR        |           |              |                  |      | Mascot      |     |     |     |     |  |
|                     |                                                         | 1469.7787           | 1469.6512   | -0.1275 | -87   | 449        | 461      | GFPTVFSANKK        |           |              |                  |      | Mascot      |     |     |     |     |  |
|                     |                                                         | 1472.6838           | 1472.5651   | -0.1187 | -81   | 336        | 347      | FVMQEEFSRDGK       |           |              | Oxidation (M)[3] |      | Mascot      |     |     |     |     |  |
|                     |                                                         | 1488.6787           | 1488.55     | -0.1287 | -86   | 336        | 347      | FVMQEEFSRDGK       |           |              |                  |      | Mascot      |     |     |     |     |  |
|                     |                                                         | 1579.8326           | 1579.693    | -0.1396 | -88   | 483        | 496      | EATNPVIGEEKPK      |           |              |                  |      | Mascot      |     |     |     |     |  |
|                     |                                                         | 1619.7839           | 1619.6466   | -0.1373 | -85   | 259        | 271      | DLLIAYVDYDEK       |           |              |                  |      | Mascot      |     |     |     |     |  |
|                     |                                                         | 1652.037            | 1652.0835   | 0.0465  | 28    | 5          | 20       | RLALFPGVALLAAAR    |           |              |                  |      | Mascot      |     |     |     |     |  |
|                     |                                                         | 1664.7584           | 1664.618    | -0.1404 | -84   | 434        | 448      | MDATANDVPSPEYVR    |           |              |                  |      | Mascot      |     |     |     |     |  |
|                     |                                                         | 1680.7534           | 1680.609    | -0.1444 | -86   | 434        | 448      | MDATANDVPSPEYVR    |           |              | Oxidation (M)[1  |      |             |     |     |     |     |  |

[illegible]

[illegible]

[illegible]

| Peptide Information |  |  |  |  |  |  |  |  |  |  |  |  |  |  |  |  |  |  |  |  |  |  |  |  |  |  |  |  |  |  |  |  |  |  |  |  |  |  |  |  |  |  |  |  |  |  |  |  |  |  |  |  |  |  |  |  |  |  |  |  |  |  |  |  |  |  |  |  |  |  |  |  |  |  |  |  |  |  |  |  |  |  |  |  |  |  |  |  |  |  |  |  |  |  |  |  |  |  |  |  |  |  |  |  |  |  |  |  |  |  |  |  |  |  |  |  |  |  |  |  |  |  |  |  |  |  |  |  |  |  |  |  |  |  |  |  |  |  |  |  |  |  |  |  |  |  |  |  |  |  |  |  |  |  |  |  |  |  |  |  |  |  |  |  |  |  |  |  |  |  |  |  |  |  |  |  |  |  |  |  |  |  |  |  |  |  |  |  |  |  |  |  |  |  |  |  |  |  |  |  |  |  |  |  |  |  |  |  |  |  |  |  |  |  |  |  |  |  |  |  |  |  |  |  |  |  |  |  |  |  |  |  |  |  |  |  |  |  |  |  |  |  |  |  |  |  |  |  |  |  |  |  |  |  |  |  |  |  |  |  |  |  |  |  |  |  |  |  |  |  |  |  |  |  |  |  |  |  |  |  |  |  |  |  |  |  |  |  |  |  |  |  |  |  |  |  |  |  |  |  |  |  |  |  |  |  |  |  |  |  |  |  |  |  |  |  |  |  |  |  |  |  |  |  |  |  |  |  |  |  |  |  |  |  |  |  |  |  |  |  |  |  |  |  |  |  |  |  |  |  |  |  |  |  |  |  |  |  |  |  |  |  |  |  |  |  |  |  |  |  |  |  |  |  |  |  |  |  |  |  |  |  |  |  |  |  |  |  |  |  |  |  |  |  |  |  |  |  |  |  |  |  |  |  |  |  |  |  |  |  |  |  |  |  |  |  |  |  |  |  |  |  |  |  |  |  |  |  |  |  |  |  |  |  |  |  |  |  |  |  |  |  |  |  |  |  |  |  |  |  |  |  |  |  |  |  |  |  |  |  |  |  |  |  |  |  |  |  |  |  |  |  |  |  |  |  |  |  |  |  |  |  |  |  |  |  |  |  |  |  |  |  |  |  |  |  |  |  |  |  |  |  |  |  |  |  |  |  |  |  |  |  |  |  |  |  |  |  |  |  |  |  |  |  |  |  |  |  |  |  |  |  |  |  |  |  |  |  |  |  |  |  |  |  |  |  |  |  |  |  |  |  |  |  |  |  |  |  |  |  |  |  |  |  |  |  |  |  |  |  |  |  |  |  |  |  |  |  |  |  |  |  |  |  |  |  |  |  |  |  |  |  |  |  |  |  |  |  |  |  |  |  |  |  |  |  |  |  |  |
|---------------------|--|--|--|--|--|--|--|--|--|--|--|--|--|--|--|--|--|--|--|--|--|--|--|--|--|--|--|--|--|--|--|--|--|--|--|--|--|--|--|--|--|--|--|--|--|--|--|--|--|--|--|--|--|--|--|--|--|--|--|--|--|--|--|--|--|--|--|--|--|--|--|--|--|--|--|--|--|--|--|--|--|--|--|--|--|--|--|--|--|--|--|--|--|--|--|--|--|--|--|--|--|--|--|--|--|--|--|--|--|--|--|--|--|--|--|--|--|--|--|--|--|--|--|--|--|--|--|--|--|--|--|--|--|--|--|--|--|--|--|--|--|--|--|--|--|--|--|--|--|--|--|--|--|--|--|--|--|--|--|--|--|--|--|--|--|--|--|--|--|--|--|--|--|--|--|--|--|--|--|--|--|--|--|--|--|--|--|--|--|--|--|--|--|--|--|--|--|--|--|--|--|--|--|--|--|--|--|--|--|--|--|--|--|--|--|--|--|--|--|--|--|--|--|--|--|--|--|--|--|--|--|--|--|--|--|--|--|--|--|--|--|--|--|--|--|--|--|--|--|--|--|--|--|--|--|--|--|--|--|--|--|--|--|--|--|--|--|--|--|--|--|--|--|--|--|--|--|--|--|--|--|--|--|--|--|--|--|--|--|--|--|--|--|--|--|--|--|--|--|--|--|--|--|--|--|--|--|--|--|--|--|--|--|--|--|--|--|--|--|--|--|--|--|--|--|--|--|--|--|--|--|--|--|--|--|--|--|--|--|--|--|--|--|--|--|--|--|--|--|--|--|--|--|--|--|--|--|--|--|--|--|--|--|--|--|--|--|--|--|--|--|--|--|--|--|--|--|--|--|--|--|--|--|--|--|--|--|--|--|--|--|--|--|--|--|--|--|--|--|--|--|--|--|--|--|--|--|--|--|--|--|--|--|--|--|--|--|--|--|--|--|--|--|--|--|--|--|--|--|--|--|--|--|--|--|--|--|--|--|--|--|--|--|--|--|--|--|--|--|--|--|--|--|--|--|--|--|--|--|--|--|--|--|--|--|--|--|--|--|--|--|--|--|--|--|--|--|--|--|--|--|--|--|--|--|--|--|--|--|--|--|--|--|--|--|--|--|--|--|--|--|--|--|--|--|--|--|--|--|--|--|--|--|--|--|--|--|--|--|--|--|--|--|--|--|--|--|--|--|--|--|--|--|--|--|--|--|--|--|--|--|--|--|--|--|--|--|--|--|--|--|--|--|--|--|--|--|--|--|--|--|--|--|--|--|--|--|--|--|--|--|--|--|--|--|--|--|--|--|--|--|--|--|--|--|--|--|--|--|--|--|--|--|--|--|--|--|--|--|--|--|--|--|--|--|--|--|--|--|
|---------------------|--|--|--|--|--|--|--|--|--|--|--|--|--|--|--|--|--|--|--|--|--|--|--|--|--|--|--|--|--|--|--|--|--|--|--|--|--|--|--|--|--|--|--|--|--|--|--|--|--|--|--|--|--|--|--|--|--|--|--|--|--|--|--|--|--|--|--|--|--|--|--|--|--|--|--|--|--|--|--|--|--|--|--|--|--|--|--|--|--|--|--|--|--|--|--|--|--|--|--|--|--|--|--|--|--|--|--|--|--|--|--|--|--|--|--|--|--|--|--|--|--|--|--|--|--|--|--|--|--|--|--|--|--|--|--|--|--|--|--|--|--|--|--|--|--|--|--|--|--|--|--|--|--|--|--|--|--|--|--|--|--|--|--|--|--|--|--|--|--|--|--|--|--|--|--|--|--|--|--|--|--|--|--|--|--|--|--|--|--|--|--|--|--|--|--|--|--|--|--|--|--|--|--|--|--|--|--|--|--|--|--|--|--|--|--|--|--|--|--|--|--|--|--|--|--|--|--|--|--|--|--|--|--|--|--|--|--|--|--|--|--|--|--|--|--|--|--|--|--|--|--|--|--|--|--|--|--|--|--|--|--|--|--|--|--|--|--|--|--|--|--|--|--|--|--|--|--|--|--|--|--|--|--|--|--|--|--|--|--|--|--|--|--|--|--|--|--|--|--|--|--|--|--|--|--|--|--|--|--|--|--|--|--|--|--|--|--|--|--|--|--|--|--|--|--|--|--|--|--|--|--|--|--|--|--|--|--|--|--|--|--|--|--|--|--|--|--|--|--|--|--|--|--|--|--|--|--|--|--|--|--|--|--|--|--|--|--|--|--|--|--|--|--|--|--|--|--|--|--|--|--|--|--|--|--|--|--|--|--|--|--|--|--|--|--|--|--|--|--|--|--|--|--|--|--|--|--|--|--|--|--|--|--|--|--|--|--|--|--|--|--|--|--|--|--|--|--|--|--|--|--|--|--|--|--|--|--|--|--|--|--|--|--|--|--|--|--|--|--|--|--|--|--|--|--|--|--|--|--|--|--|--|--|--|--|--|--|--|--|--|--|--|--|--|--|--|--|--|--|--|--|--|--|--|--|--|--|--|--|--|--|--|--|--|--|--|--|--|--|--|--|--|--|--|--|--|--|--|--|--|--|--|--|--|--|--|--|--|--|--|--|--|--|--|--|--|--|--|--|--|--|--|--|--|--|--|--|--|--|--|--|--|--|--|--|--|--|--|--|--|--|--|--|--|--|--|--|--|--|--|--|--|--|--|--|--|--|--|--|--|--|--|--|--|--|--|--|--|--|--|--|--|--|--|--|--|--|--|--|--|--|--|--|--|--|--|--|--|--|--|--|--|--|--|--|--|--|--|--|

|                |                                                                                                                         |             |         |               |            |                               |                        |                  |            |                         |                    |                 |                   |    |        |   |  |  |  |
|----------------|-------------------------------------------------------------------------------------------------------------------------|-------------|---------|---------------|------------|-------------------------------|------------------------|------------------|------------|-------------------------|--------------------|-----------------|-------------------|----|--------|---|--|--|--|
|                | 1045.5497                                                                                                               | 1045.4802   | -0.0595 | 26            | 37         | SRGGGSGAAAVR                  |                        |                  |            |                         |                    |                 |                   |    | Mascot |   |  |  |  |
|                | 1291.6133                                                                                                               | 1291.5454   | -0.0679 | -53           | 216        | D2VVALNAAMER                  |                        |                  |            |                         |                    |                 |                   |    | Mascot |   |  |  |  |
|                | 1434.6543                                                                                                               | 1434.6215   | -0.0328 | -23           | 430        | 441 MENDSRGHIFGR              |                        |                  |            | Oxidation (Mj)[1]       |                    |                 |                   |    | Mascot |   |  |  |  |
|                | 1880.8218                                                                                                               | 1880.8403   | 0.0185  | 10            | 310        | 325 EMDDSEINPGQIFEK           |                        |                  |            |                         |                    |                 |                   |    | Mascot |   |  |  |  |
|                | 2105.9954                                                                                                               | 2105.8918   | -0.1036 | -49           | 68         | 89 VADAMASGMRAGLADD<br>GAGELK |                        |                  |            |                         |                    |                 |                   |    | Mascot |   |  |  |  |
|                | 2105.9954                                                                                                               | 2105.8918   | -0.1036 | -49           | 68         | 89 VADAMASGMRAGLADD<br>GAGELK |                        |                  |            |                         |                    |                 |                   |    | Mascot |   |  |  |  |
| 10             | N-terminal acetyltransferase A complex subunit NAT OS=Saccharomyces cerevisiae GN-NAT1 PE=1 SV=-<br>Peptide Information |             |         |               |            |                               |                        |                  |            |                         | NAT1_YEAST         | 98843           | 8.86              | 11 | 46     | 0 |  |  |  |
|                | Calc. Mass                                                                                                              | Obsrv. Mass | ± da    | ± ppm         | Start Seq. | End Seq.                      | Sequence               | Ion Score        | C. I. %    | Modification            | Rank               | Result Type     |                   |    |        |   |  |  |  |
|                | 1000.6036                                                                                                               | 1000.4977   | -0.1059 | -106          | 357        | 365                           | SKVSPLLEK              |                  |            |                         |                    | Mascot          |                   |    |        |   |  |  |  |
|                | 1159.5994                                                                                                               | 1159.5713   | -0.0281 | -24           | 761        | 770                           | NDTDPFDLIK             |                  |            |                         |                    | Mascot          |                   |    |        |   |  |  |  |
|                | 1337.7212                                                                                                               | 1337.746    | 0.0248  | 19            | 808        | 818                           | NDINGLFLFYR            |                  |            |                         |                    | Mascot          |                   |    |        |   |  |  |  |
|                | 1337.7212                                                                                                               | 1337.746    | 0.0248  | 19            | 808        | 818                           | NDINGLFLFYR            |                  |            |                         |                    | Mascot          |                   |    |        |   |  |  |  |
|                | 1434.8137                                                                                                               | 1434.6215   | -0.1922 | -134          | 724        | 736                           | IGRLALGFSLIK           |                  |            | Carbamidomethyl (C)[7]  |                    | Mascot          |                   |    |        |   |  |  |  |
|                | 1704.8286                                                                                                               | 1704.6854   | -0.1432 | -84           | 527        | 541                           | EVEDSKSEDIANDIK        |                  |            |                         |                    | Mascot          |                   |    |        |   |  |  |  |
|                | 1730.8456                                                                                                               | 1730.6802   | -0.1654 | -96           | 160        | 175                           | ANWTSLSVAQDVNGER       | 5                | 0          |                         |                    | Mascot          |                   |    |        |   |  |  |  |
|                | 1730.8456                                                                                                               | 1730.6802   | -0.1654 | -96           | 160        | 175                           | ANWTSLSVAQDVNGER       |                  |            |                         |                    | Mascot          |                   |    |        |   |  |  |  |
|                | 1880.9501                                                                                                               | 1880.8403   | -0.1098 | -58           | 109        | 125                           | ESIKWFTALNNGSTNK       |                  |            |                         |                    | Mascot          |                   |    |        |   |  |  |  |
|                | 1996.0498                                                                                                               | 1995.8508   | -0.199  | -100          | 126        | 142                           | QIYRDLATLSQGIDFK       |                  |            |                         |                    | Mascot          |                   |    |        |   |  |  |  |
|                | 1996.0498                                                                                                               | 1995.8508   | -0.199  | -100          | 126        | 142                           | QIYRDLATLSQGIDFK       |                  |            |                         |                    | Mascot          |                   |    |        |   |  |  |  |
|                | 2007.0393                                                                                                               | 2006.9393   | -0.1    | -50           | 471        | 489                           | AIVEVASLFTKNDSDVNGIK   |                  |            |                         |                    | Mascot          |                   |    |        |   |  |  |  |
|                | 2018.8834                                                                                                               | 2018.9926   | 0.1092  | 54            | 193        | 208                           | IDSEKYEHSLEMLYK        |                  |            | Carbamidomethyl (C)[12] |                    | Mascot          |                   |    |        |   |  |  |  |
|                | 2438.198                                                                                                                | 2439.033    | -0.165  | -68           | 490        | 509                           | DHLHVEASWFVEQAQAY YR   |                  |            |                         |                    | Mascot          |                   |    |        |   |  |  |  |
| Gel Idx/Pos    | A/9                                                                                                                     |             |         |               |            |                               | Instr./Gel Origin      | AB4700/110211A   |            | Process Status          | Analysis Succeeded |                 |                   |    |        |   |  |  |  |
| Plate [#] Name | [1] 8907                                                                                                                |             |         |               |            |                               | Instrument Sample Name |                  |            | Spectra                 | 8                  |                 |                   |    |        |   |  |  |  |
| Rank           | Protein Name                                                                                                            | Species     |         | Accession No. |            | Protein MW                    |                        | Protein PI Count | Pep. Count | Protein Score           | Protein C. I. %    | Total Ion Score | Total Ion C. I. % |    |        |   |  |  |  |
| 1              | unnamed protein product [Mus musculus]<br>Peptide Information                                                           |             |         | g l74223737   |            | 49652                         |                        | 4.78             | 22         | 741                     | 100                | 500             | 100               |    |        |   |  |  |  |
|                | Calc. Mass                                                                                                              | Obsrv. Mass | ± da    | ± ppm         | Start Seq. | End Seq.                      | Sequence               | Ion Score        | C. I. %    | Modification            | Rank               | Result Type     |                   |    |        |   |  |  |  |
|                | 1028.5194                                                                                                               | 1028.4437   | -0.0757 | -74           | 351        | 359                           | TAVCDIPPR              |                  |            | Carbamidomethyl (C)[4]  |                    | Mascot          |                   |    |        |   |  |  |  |
|                | 1039.5935                                                                                                               | 1039.5179   | -0.0756 | -73           | 310        | 318                           | YLTVAAVFR              | 48               | 94.168     |                         | </                 |                 |                   |    |        |   |  |  |  |

[illegible]



|           |           |         |     |     |     |                                 |     |        |                                            |        |
|-----------|-----------|---------|-----|-----|-----|---------------------------------|-----|--------|--------------------------------------------|--------|
| 1229.5983 | 1229.5092 | -0.0891 | -72 | 381 | 390 | ISEQFTAMFR                      | 59  | 99.467 |                                            | Mascot |
| 1229.5983 | 1229.5092 | -0.0891 | -72 | 381 | 390 | ISEQFTAMFR                      |     |        | Oxidation [M][8]                           | Mascot |
| 1245.5933 | 1245.4937 | -0.0996 | -80 | 381 | 390 | ISEQFTAMFR                      |     |        |                                            | Mascot |
| 1258.6902 | 1258.5995 | -0.0907 | -72 | 242 | 252 | FPQQLNADLRK                     |     |        |                                            | Mascot |
| 1271.7292 | 1271.6367 | -0.0925 | -73 | 252 | 262 | KLAVNMVPPFR                     |     |        |                                            | Mascot |
|           | 1271.6367 |         |     |     |     |                                 |     |        |                                            | Mascot |
| 1287.7241 | 1287.6202 | -0.1039 | -81 | 252 | 262 | KLAVNMVPPFR                     |     |        | Oxidation [M][6]                           | Mascot |
| 1385.6995 | 1385.5964 | -0.1031 | -74 | 381 | 391 | ISEQFTAMFRR                     |     |        |                                            | Mascot |
| 1401.6943 | 1401.5809 | -0.1134 | -81 | 381 | 391 | ISEQFTAMFRR                     |     |        | Oxidation [M][8]                           | Mascot |
| 1615.8359 | 1615.7191 | -0.1168 | -72 | 63  | 77  | AVLDLEPGTMDSVR                  |     |        |                                            | Mascot |
| 1620.8356 | 1620.7164 | -0.1192 | -74 | 263 | 276 | LHFFMPGFAPLTSR                  | 82  | 99.998 |                                            | Mascot |
| 1620.8356 | 1620.7164 | -0.1192 | -74 | 263 | 276 | LHFFMPGFAPLTSR                  |     |        |                                            | Mascot |
| 1631.8309 | 1631.7075 | -0.1234 | -76 | 63  | 77  | AVLDLEPGTMDSVR                  |     |        | Oxidation [M][11]                          | Mascot |
| 1636.8304 | 1636.705  | -0.1254 | -77 | 263 | 276 | LHFFMPGFAPLTSR                  |     |        | Oxidation [M][5]                           | Mascot |
| 1696.8329 | 1696.6941 | -0.1388 | -82 | 337 | 350 | NSSYFVEWIPNNVK                  |     |        |                                            | Mascot |
| 1822.9227 | 1822.7826 | -0.1401 | -77 | 3   | 19  | EIVHLAGQCQGNQIAK                |     |        | Carbamidomethyl [C][10]                    | Mascot |
| 1958.9817 | 1958.8319 | -0.1498 | -76 | 104 | 121 | GHYTEGAELVDSVLDVV<br>R          |     |        |                                            | Mascot |
| 1958.9817 | 1958.8319 | -0.1498 | -76 | 104 | 121 | GHYTEGAELVDSVLDVV<br>R          | 135 | 100    |                                            | Mascot |
| 2014.0426 | 2013.8954 | -0.1472 | -73 | 363 | 380 | MSATFIGNSTAIQELFKR              |     |        |                                            | Mascot |
| 2087.0767 | 2086.9177 | -0.159  | -76 | 104 | 122 | GHYTEGAELVDSVLDVV<br>RK         |     |        |                                            | Mascot |
| 2110.0645 | 2109.9023 | -0.1622 | -77 | 1   | 19  | MREIVHIQAGQCQNOIGA<br>K         |     |        | Carbamidomethyl [C][12]                    | Mascot |
| 2126.0593 | 2125.8967 | -0.1626 | -76 | 1   | 19  | MREIVHIQAGQCQNOIGA<br>K         |     |        | Carbamidomethyl [C][12], Oxidation [M][1]  | Mascot |
| 2708.3381 | 2708.1213 | -0.2168 | -80 | 217 | 241 | LTTPTYGDLNHLVSATMS<br>GVTTCLR   | 91  | 100    | Carbamidomethyl [C][23]                    | Mascot |
| 2708.3381 | 2708.1213 | -0.2168 | -80 | 217 | 241 | LTTPTYGDLNHLVSATMS<br>GVTTCLR   |     |        | Carbamidomethyl [C][23]                    | Mascot |
| 2724.333  | 2724.124  | -0.209  | -77 | 217 | 241 | LTTPTYGDLNHLVSATMS<br>GVTTCLR   |     |        | Carbamidomethyl [C][23], Oxidation [M][17] | Mascot |
| 2798.3433 | 2798.1177 | -0.2256 | -81 | 78  | 103 | SGPFGQIFRPDNFVFGQ<br>SGAGNNWAK  | 39  | 47.179 |                                            | Mascot |
| 2798.3433 | 2798.1177 | -0.2256 | -81 | 78  | 103 | SGPFGQIFRPDNFVFGQ<br>SGAGNNWAK  |     |        |                                            | Mascot |
| 3102.4075 | 3102.1646 | -0.2429 | -78 | 20  | 46  | FWEVISDEHIDPTGTSYH<br>GDSLDQLER |     |        |                                            | Mascot |

8 RecName: Full=Tubulin beta-2C chain  
Peptide Information  
gi|298351865 31895.9 6.24 19 723 100 500 100

| Calc. Mass | Obsrv. Mass | ± da    | ± ppm | Start Seq. | End Seq. | Sequence                        | Ion Score | C. I. % | Modification                               | Rank | Result Type |
|------------|-------------|---------|-------|------------|----------|---------------------------------|-----------|---------|--------------------------------------------|------|-------------|
| 1028.5194  | 1028.4437   | -0.0757 | -74   | 250        | 258      | TAVCDIPPR                       |           |         | Carbamidomethyl [C][4]                     |      | Mascot      |
| 1039.5935  | 1039.5179   | -0.0756 | -73   | 241        | 249      | YLTVAAVFR                       | 48        | 94.168  |                                            |      | Mascot      |
| 1039.5935  | 1039.5179   | -0.0756 | -73   | 241        | 249      | YLTVAAVFR                       |           |         |                                            |      | Mascot      |
| 1077.5323  | 1077.4445   | -0.0878 | -81   | 155        | 162      | IREEYPRD                        |           |         |                                            |      | Mascot      |
| 1130.5953  | 1130.512    | -0.0833 | -74   | 188        | 197      | FPQQLNADLR                      |           |         |                                            |      | Mascot      |
| 1143.6343  | 1143.5522   | -0.0821 | -72   | 199        | 208      | LAVNMVPPFR                      | 46        | 89.557  |                                            |      | Mascot      |
| 1143.6343  | 1143.5522   | -0.0821 | -72   | 199        | 208      | LAVNMVPPFR                      |           |         | Oxidation [M][5]                           |      | Mascot      |
| 1159.6292  | 1159.5356   | -0.0936 | -81   | 199        | 208      | LAVNMVPPFR                      |           |         |                                            |      | Mascot      |
| 1229.5983  | 1229.5092   | -0.0891 | -72   | 280        | 289      | ISEQFTAMFR                      | 59        | 99.467  |                                            |      | Mascot      |
| 1229.5983  | 1229.5092   | -0.0891 | -72   | 280        | 289      | ISEQFTAMFR                      |           |         |                                            |      | Mascot      |
| 1245.5933  | 1245.4937   | -0.0996 | -80   | 280        | 289      | ISEQFTAMFR                      |           |         | Oxidation [M][8]                           |      | Mascot      |
| 1258.6902  | 1258.5995   | -0.0907 | -72   | 188        | 198      | FPQQLNADLRK                     |           |         |                                            |      | Mascot      |
| 1271.7292  | 1271.6367   | -0.0925 | -73   | 198        | 208      | KLAVNMVPPFR                     |           |         |                                            |      | Mascot      |
| 1287.7241  | 1287.6202   | -0.1039 | -81   | 198        | 208      | KLAVNMVPPFR                     |           |         | Oxidation [M][6]                           |      | Mascot      |
| 1385.6995  | 1385.5964   | -0.1031 | -74   | 280        | 290      | ISEQFTAMFRR                     |           |         |                                            |      | Mascot      |
| 1401.6943  | 1401.5809   | -0.1134 | -81   | 280        | 290      | ISEQFTAMFRR                     |           |         | Oxidation [M][8]                           |      | Mascot      |
| 1601.8203  | 1601.7069   | -0.1134 | -71   | 63         | 77       | AVLDLEPGTMDSVR                  |           |         |                                            |      | Mascot      |
| 1620.8356  | 1620.7164   | -0.1192 | -74   | 209        | 222      | LHFFMPGFAPLTSR                  | 82        | 99.998  |                                            |      | Mascot      |
| 1620.8356  | 1620.7164   | -0.1192 | -74   | 209        | 222      | LHFFMPGFAPLTSR                  |           |         |                                            |      | Mascot      |
| 1636.8304  | 1636.705    | -0.1254 | -77   | 209        | 222      | LHFFMPGFAPLTSR                  |           |         | Oxidation [M][5]                           |      | Mascot      |
| 1822.9227  | 1822.7826   | -0.1401 | -77   | 3          | 19       | EIVHLAGQCQGNQIAK                |           |         | Carbamidomethyl [C][10]                    |      | Mascot      |
| 1958.9817  | 1958.8319   | -0.1498 | -76   | 104        | 121      | GHYTEGAELVDSVLDVV<br>R          |           |         |                                            |      | Mascot      |
| 1958.9817  | 1958.8319   | -0.1498 | -76   | 104        | 121      | GHYTEGAELVDSVLDVV<br>R          | 135       | 100     |                                            |      | Mascot      |
| 2014.0426  | 2013.8954   | -0.1472 | -73   | 262        | 279      | MSATFIGNSTAIQELFKR              |           |         |                                            |      | Mascot      |
| 2087.0767  | 2086.9177   | -0.159  | -76   | 104        | 122      | GHYTEGAELVDSVLDVV<br>RK         |           |         |                                            |      | Mascot      |
| 2110.0645  | 2109.9023   | -0.1622 | -77   | 1          | 19       | MREIVHLQAGQCQNOIG<br>AK         |           |         | Carbamidomethyl [C][12]                    |      | Mascot      |
| 2126.0593  | 2125.8967   | -0.1626 | -76   | 1          | 19       | MREIVHLQAGQCQNOIG<br>AK         |           |         | Carbamidomethyl [C][12], Oxidation [M][1]  |      | Mascot      |
| 2708.3381  | 2708.1213   | -0.2168 | -80   | 163        | 187      | LTTPTYGDLNHLVSATMS<br>GVTTCLR   | 91        | 100     | Carbamidomethyl [C][23]                    |      | Mascot      |
| 2708.3381  | 2708.1213   | -0.2168 | -80   | 163        | 187      | LTTPTYGDLNHLVSATMS<br>GVTTCLR   |           |         | Carbamidomethyl [C][23]                    |      | Mascot      |
| 2724.333   | 2724.124    | -0.209  | -77   | 163        | 187      | LTTPTYGDLNHLVSATMS<br>GVTTCLR   |           |         | Carbamidomethyl [C][23], Oxidation [M][17] |      | Mascot      |
| 2798.3433  | 2798.1177   | -0.2256 | -81   | 78         | 103      | SGPFGQIFRPDNFVFGQ<br>SGAGNNWAK  | 39        | 47.179  |                                            |      | Mascot      |
| 2798.3433  | 2798.1177   | -0.2256 | -81   | 78         | 103      | SGPFGQIFRPDNFVFGQ<br>SGAGNNWAK  |           |         |                                            |      | Mascot      |
| 3116.4231  | 3116.187    | -0.2361 | -76   | 20         | 46       | FWEVISDEHIDPTGTGYH<br>GDSLDQLER |           |         |                                            |      | Mascot      |

9 Tubulin, beta 2C [Mus musculus]  
Peptide Information  
gi|13542680 49783 4.79 21 721 100 500 100

| Calc. Mass | Obsrv. Mass | ± da    | ± ppm | Start Seq. | End Seq. | Sequence                | Ion Score | C. I. % | Modification            | Rank | Result Type |
|------------|-------------|---------|-------|------------|----------|-------------------------|-----------|---------|-------------------------|------|-------------|
| 1028.5194  | 1028.4437   | -0.0757 | -74   | 351        | 359      | TAVCDIPPR               |           |         | Carbamidomethyl [C][4]  |      | Mascot      |
| 1039.5935  | 1039.5179   | -0.0756 | -73   | 310        | 318      | YLTVAAVFR               | 48        | 94.168  |                         |      | Mascot      |
| 1039.5935  | 1039.5179   | -0.0756 | -73   | 310        | 318      | YLTVAAVFR               |           |         |                         |      | Mascot      |
| 1065.4275  | 1065.3419   | -0.0856 | -80   | 298        | 306      | NMMAACDPR               |           |         | Carbamidomethyl [C][6]  |      | Mascot      |
| 1065.4275  | 1065.3419   |         |       |            |          |                         |           |         |                         |      | Mascot      |
| 1077.5323  | 1077.4445   | -0.0878 | -81   | 155        | 162      | IREEYPRD                |           |         |                         |      | Mascot      |
| 1130.5953  | 1130.512    | -0.0833 | -74   | 242        | 251      | FPQQLNADLR              |           |         |                         |      | Mascot      |
| 1143.6343  | 1143.5522   | -0.0821 | -72   | 253        | 262      | LAVNMVPPFR              |           |         |                         |      | Mascot      |
| 1143.6343  | 1143.5522   | -0.0821 | -72   | 253        | 262      | LAVNMVPPFR              | 46        | 89.557  |                         |      | Mascot      |
| 1159.6292  | 1159.5356   | -0.0936 | -81   | 253        | 262      | LAVNMVPPFR              |           |         | Oxidation [M][5]        |      | Mascot      |
| 1229.5983  | 1229.5092   | -0.0891 | -72   | 381        | 390      | ISEQFTAMFR              | 59        | 99.467  |                         |      | Mascot      |
| 1229.5983  | 1229.5092   | -0.0891 | -72   | 381        | 390      | ISEQFTAMFR              |           |         |                         |      | Mascot      |
| 1245.5933  | 1245.4937   | -0.0996 | -80   | 381        | 390      | ISEQFTAMFR              |           |         | Oxidation [M][8]        |      | Mascot      |
| 1258.6902  | 1258.5995   | -0.0907 | -72   | 242        | 252      | FPQQLNADLRK             |           |         |                         |      | Mascot      |
| 1271.7292  | 1271.6367   | -0.0925 | -73   | 252        | 262      | KLAVNMVPPFR             |           |         | Oxidation [M][6]        |      | Mascot      |
| 1287.7241  | 1287.6202   | -0.1039 | -81   | 252        | 262      | KLAVNMVPPFR             |           |         |                         |      | Mascot      |
| 1385.6995  | 1385.5964   | -0.1031 | -74   | 381        | 391      | ISEQFTAMFRR             |           |         |                         |      | Mascot      |
| 1401.6943  | 1401.5809   | -0.1134 | -81   | 381        | 391      | ISEQFTAMFRR             |           |         | Oxidation [M][8]        |      | Mascot      |
| 1601.8203  | 1601.7069   | -0.1134 | -71   | 63         | 77       | AVLDLEPGTMDSVR          |           |         |                         |      | Mascot      |
| 1620.8356  | 1620.7164   | -0.1192 | -74   | 263        | 276      | LHFFMPGFAPLTSR          | 82        | 99.998  |                         |      | Mascot      |
| 1620.8356  | 1620.7164   | -0.1192 | -74   | 263        | 276      | LHFFMPGFAPLTSR          |           |         |                         |      | Mascot      |
| 1636.8304  | 1636.705    | -0.1254 | -77   | 263        | 276      | LHFFMPGFAPLTSR          |           |         | Oxidation [M][5]        |      | Mascot      |
| 1696.8329  | 1696.6941   | -0.1388 | -82   | 337        | 350      | NSSYFVEWIPNNVK          |           |         |                         |      | Mascot      |
| 1822.9227  | 1822.7826   | -0.1401 | -77   | 3          | 19       | EIVHLAGQCQGNQIAK        |           |         | Carbamidomethyl [C][10] |      | Mascot      |
| 1958.9817  | 1958.8319   | -0.1498 | -76   | 104        | 121      | GHYTEGAELVDSVLDVV<br>R  |           |         |                         |      | Mascot      |
| 1958.9817  | 1958.8319   | -0.1498 | -76   | 104        | 121      | GHYTEGAELVDSVLDVV<br>R  | 135       | 100     |                         |      | Mascot      |
| 2014.0426  | 2013.8954   | -0.1472 | -73   | 363        | 380      | MSATFIGNSTAIQELFKR      |           |         |                         |      | Mascot      |
| 2087.0767  | 2086.9177   | -0.159  | -76   | 104        | 122      | GHYTEGAELVDSVLDVV<br>RK |           |         |                         |      | Mascot      |



|           |           |         |     |     |     |                           |                           |        |
|-----------|-----------|---------|-----|-----|-----|---------------------------|---------------------------|--------|
| 2235.0962 | 2234.9573 | -0.1389 | -62 | 286 | 305 | KEFPGLAETIAEVDCTA<br>ER   | Carbamidomethyl (C)[16]   | Mascot |
| 2264.0547 | 2263.916  | -0.1387 | -61 | 162 | 180 | IGKVDCTQHYELCSGNQ<br>VR   | Carbamidomethyl (C)[6,13] | Mascot |
| 2573.2783 | 2573.1226 | -0.1557 | -61 | 109 | 131 | QGLYELSGNFELHVAQ<br>GDHFK |                           | Mascot |

3 thioresoxin related protein [Homo sapiens] gi|20067392 40677.1 5.52 10 352 100 285 100

| Peptide Information |             |         |       |            |          |                              |           |         |                                              | Rank | Result Type |
|---------------------|-------------|---------|-------|------------|----------|------------------------------|-----------|---------|----------------------------------------------|------|-------------|
| Calc. Mass          | Obsrv. Mass | ± da    | ± ppm | Start Seq. | End Seq. | Sequence                     | Ion Score | C. I. % | Modification                                 |      |             |
| 1079.6248           | 1079.558    | -0.0668 | -62   | 326        | 334      | GYPTLLLFRR                   |           |         |                                              |      | Mascot      |
| 1079.6248           | 1079.558    | -0.0668 | -62   | 326        | 334      | GYPTLLLFRR                   | 63        | 99.806  |                                              |      | Mascot      |
| 1152.62             | 1152.5521   | -0.0679 | -59   | 192        | 200      | GYPTLLWFR                    |           |         |                                              |      | Mascot      |
| 1152.62             | 1152.5521   | -0.0679 | -59   | 192        | 200      | GYPTLLWFR                    | 55        | 98.864  |                                              |      | Mascot      |
| 1309.5604           | 1309.4818   | -0.0786 | -60   | 143        | 152      | FFAPWCGHCK                   |           |         | Carbamidomethyl (C)[6,9]                     |      | Mascot      |
| 1325.5554           | 1325.4724   | -0.083  | -63   | 276        | 285      | FYAPWCGHCK                   | 59        | 99.549  | Carbamidomethyl (C)[6,9]                     |      | Mascot      |
| 1325.5554           | 1325.4724   | -0.083  | -63   | 276        | 285      | FYAPWCGHCK                   |           |         | Carbamidomethyl (C)[6,9]                     |      | Mascot      |
| 1965.8541           | 1965.7312   | -0.1229 | -63   | 176        | 191      | VDCTQHYELCSGNQVR             | 108       | 100     | Carbamidomethyl (C)[3,10]                    |      | Mascot      |
| 1965.8541           | 1965.7312   | -0.1229 | -63   | 176        | 191      | VDCTQHYELCSGNQVR             |           |         | Carbamidomethyl (C)[3,10]                    |      | Mascot      |
| 2193.155            | 2193.02     | -0.135  | -62   | 153        | 172      | ALAPTWEQLALGLEHSET<br>VK     |           |         |                                              |      | Mascot      |
| 2225.0178           | 2224.8904   | -0.1274 | -57   | 26         | 44       | LQPTWNDLGDKNYSMED<br>AK      |           |         |                                              |      | Mascot      |
| 2264.0547           | 2263.916    | -0.1387 | -61   | 173        | 191      | IGKVDCTQHYELCSGNQ<br>VR      |           |         | Carbamidomethyl (C)[6,13]                    |      | Mascot      |
| 2421.1284           | 2421.0378   | -0.0906 | -37   | 50         | 71       | VDCTAHSQVCSAQGVRG            |           |         | Carbamidomethyl (C)[3,10]                    |      | Mascot      |
|                     |             |         |       |            |          | YPTLK                        |           |         |                                              |      | Mascot      |
| 2998.3157           | 2998.3354   | 0.0197  | 7     | 1          | 25       | MFTHGQSAAHFVMFFAP<br>WCGHCQR |           |         | Carbamidomethyl (C)[20], Oxidation (M)[1,14] |      | Mascot      |

4 PREDICTED: similar to Thioresoxin domain-containing protein 5 precursor (Thioresoxin-like protein p gi|194223000 39011.2 5.56 9 343 100 285 100

| Peptide Information |             |         |       |            |          |                          |           |         |                           | Rank | Result Type |
|---------------------|-------------|---------|-------|------------|----------|--------------------------|-----------|---------|---------------------------|------|-------------|
| Calc. Mass          | Obsrv. Mass | ± da    | ± ppm | Start Seq. | End Seq. | Sequence                 | Ion Score | C. I. % | Modification              |      |             |
| 1079.6248           | 1079.558    | -0.0668 | -62   | 312        | 320      | GYPTLLLFRR               |           |         |                           |      | Mascot      |
| 1079.6248           | 1079.558    | -0.0668 | -62   | 312        | 320      | GYPTLLLFRR               | 63        | 99.806  |                           |      | Mascot      |
| 1150.6255           | 1150.5465   | -0.079  | -69   | 58         | 67       | FFPQGEAVK                |           |         |                           |      | Mascot      |
| 1152.62             | 1152.5521   | -0.0679 | -59   | 178        | 186      | GYPTLLWFR                |           |         |                           |      | Mascot      |
| 1152.62             | 1152.5521   | -0.0679 | -59   | 178        | 186      | GYPTLLWFR                | 55        | 98.864  |                           |      | Mascot      |
| 1309.5604           | 1309.4818   | -0.0786 | -60   | 129        | 138      | FFAPWCGHCK               |           |         | Carbamidomethyl (C)[6,9]  |      | Mascot      |
| 1325.5554           | 1325.4724   | -0.083  | -63   | 262        | 271      | FYAPWCGHCK               | 59        | 99.549  | Carbamidomethyl (C)[6,9]  |      | Mascot      |
| 1325.5554           | 1325.4724   | -0.083  | -63   | 262        | 271      | FYAPWCGHCK               |           |         | Carbamidomethyl (C)[6,9]  |      | Mascot      |
| 1965.8541           | 1965.7312   | -0.1229 | -63   | 162        | 177      | VDCTQHYELCSGNQVR         | 108       | 100     | Carbamidomethyl (C)[3,10] |      | Mascot      |
| 1965.8541           | 1965.7312   | -0.1229 | -63   | 162        | 177      | VDCTQHYELCSGNQVR         |           |         | Carbamidomethyl (C)[3,10] |      | Mascot      |
| 2193.155            | 2193.02     | -0.135  | -62   | 139        | 158      | ALAPTWEQLALGLEHSET<br>VK |           |         |                           |      | Mascot      |
| 2225.0178           | 2224.8904   | -0.1274 | -57   | 12         | 30       | LQPTWNDLGDKNYSMED<br>AK  |           |         |                           |      | Mascot      |
| 2264.0547           | 2263.916    | -0.1387 | -61   | 159        | 177      | IGKVDCTQHYELCSGNQ<br>VR  |           |         | Carbamidomethyl (C)[6,13] |      | Mascot      |

5 hypothetical protein [Homo sapiens] gi|52545767 43477.3 5.29 9 340 100 285 100

| Peptide Information |             |         |       |            |          |                            |           |         |                           | Rank | Result Type |
|---------------------|-------------|---------|-------|------------|----------|----------------------------|-----------|---------|---------------------------|------|-------------|
| Calc. Mass          | Obsrv. Mass | ± da    | ± ppm | Start Seq. | End Seq. | Sequence                   | Ion Score | C. I. % | Modification              |      |             |
| 1079.6248           | 1079.558    | -0.0668 | -62   | 355        | 363      | GYPTLLLFRR                 |           |         |                           |      | Mascot      |
| 1079.6248           | 1079.558    | -0.0668 | -62   | 355        | 363      | GYPTLLLFRR                 | 63        | 99.806  |                           |      | Mascot      |
| 1152.62             | 1152.5521   | -0.0679 | -59   | 221        | 229      | GYPTLLWFR                  |           |         |                           |      | Mascot      |
| 1152.62             | 1152.5521   | -0.0679 | -59   | 221        | 229      | GYPTLLWFR                  | 55        | 98.864  |                           |      | Mascot      |
| 1309.5604           | 1309.4818   | -0.0786 | -60   | 172        | 181      | FFAPWCGHCK                 |           |         | Carbamidomethyl (C)[6,9]  |      | Mascot      |
| 1325.5554           | 1325.4724   | -0.083  | -63   | 305        | 314      | FYAPWCGHCK                 | 59        | 99.549  | Carbamidomethyl (C)[6,9]  |      | Mascot      |
| 1325.5554           | 1325.4724   | -0.083  | -63   | 305        | 314      | FYAPWCGHCK                 |           |         | Carbamidomethyl (C)[6,9]  |      | Mascot      |
| 1965.8541           | 1965.7312   | -0.1229 | -63   | 205        | 220      | VDCTQHYELCSGNQVR           | 108       | 100     | Carbamidomethyl (C)[3,10] |      | Mascot      |
| 1965.8541           | 1965.7312   | -0.1229 | -63   | 205        | 220      | VDCTQHYELCSGNQVR           |           |         | Carbamidomethyl (C)[3,10] |      | Mascot      |
| 2193.155            | 2193.02     | -0.135  | -62   | 182        | 201      | ALAPTWEQLALGLEHSET<br>VK   |           |         |                           |      | Mascot      |
| 2225.0178           | 2224.8904   | -0.1274 | -57   | 55         | 73       | LQPTWNDLGDKNYSMED<br>AK    |           |         |                           |      | Mascot      |
| 2264.0547           | 2263.916    | -0.1387 | -61   | 202        | 220      | IGKVDCTQHYELCSGNQ<br>VR    |           |         | Carbamidomethyl (C)[6,13] |      | Mascot      |
| 2421.1284           | 2421.0378   | -0.0906 | -37   | 79         | 100      | VDCTAHSQVCSAQGVRG<br>YPTLK |           |         | Carbamidomethyl (C)[3,10] |      | Mascot      |

6 PREDICTED: thioresoxin domain-containing protein 5-like [Pongo abeli] gi|297677103 47472.6 5.73 9 338 100 285 100

| Peptide Information |             |         |       |            |          |                                     |           |         |                           | Rank | Result Type |
|---------------------|-------------|---------|-------|------------|----------|-------------------------------------|-----------|---------|---------------------------|------|-------------|
| Calc. Mass          | Obsrv. Mass | ± da    | ± ppm | Start Seq. | End Seq. | Sequence                            | Ion Score | C. I. % | Modification              |      |             |
| 1079.6248           | 1079.558    | -0.0668 | -62   | 394        | 402      | GYPTLLLFRR                          |           |         |                           |      | Mascot      |
| 1079.6248           | 1079.558    | -0.0668 | -62   | 394        | 402      | GYPTLLLFRR                          | 63        | 99.806  |                           |      | Mascot      |
| 1152.62             | 1152.5521   | -0.0679 | -59   | 260        | 268      | GYPTLLWFR                           |           |         |                           |      | Mascot      |
| 1152.62             | 1152.5521   | -0.0679 | -59   | 260        | 268      | GYPTLLWFR                           | 55        | 98.864  |                           |      | Mascot      |
| 1309.5604           | 1309.4818   | -0.0786 | -60   | 211        | 220      | FFAPWCGHCK                          |           |         | Carbamidomethyl (C)[6,9]  |      | Mascot      |
| 1325.5554           | 1325.4724   | -0.083  | -63   | 344        | 353      | FYAPWCGHCK                          | 59        | 99.549  | Carbamidomethyl (C)[6,9]  |      | Mascot      |
| 1325.5554           | 1325.4724   | -0.083  | -63   | 344        | 353      | FYAPWCGHCK                          |           |         | Carbamidomethyl (C)[6,9]  |      | Mascot      |
| 1965.8541           | 1965.7312   | -0.1229 | -63   | 244        | 259      | VDCTQHYELCSGNQVR                    | 108       | 100     | Carbamidomethyl (C)[3,10] |      | Mascot      |
| 1965.8541           | 1965.7312   | -0.1229 | -63   | 244        | 259      | VDCTQHYELCSGNQVR                    |           |         | Carbamidomethyl (C)[3,10] |      | Mascot      |
| 2193.155            | 2193.02     | -0.135  | -62   | 221        | 240      | ALAPTWEQLALGLEHSET<br>VK            |           |         |                           |      | Mascot      |
| 2225.0178           | 2224.8904   | -0.1274 | -57   | 94         | 112      | LQPTWNDLGDKNYSMED<br>AK             |           |         |                           |      | Mascot      |
| 2264.0547           | 2263.916    | -0.1387 | -61   | 241        | 259      | IGKVDCTQHYELCSGNQ<br>VR             |           |         | Carbamidomethyl (C)[6,13] |      | Mascot      |
| 3175.9307           | 3176.3906   | 0.4599  | 145   | 8          | 38       | LLPFLARPSALTALLLLLLL<br>GHSGGGRWGAR |           |         |                           |      | Mascot      |

7 thioresoxin domain-containing protein 5 isoform 1 precursor [Homo sapiens] gi|42794771 47598.7 5.63 9 337 100 285 100

| Peptide Information |             |         |       |            |          |                            |           |         |                           | Rank | Result Type |
|---------------------|-------------|---------|-------|------------|----------|----------------------------|-----------|---------|---------------------------|------|-------------|
| Calc. Mass          | Obsrv. Mass | ± da    | ± ppm | Start Seq. | End Seq. | Sequence                   | Ion Score | C. I. % | Modification              |      |             |
| 1079.6248           | 1079.558    | -0.0668 | -62   | 395        | 403      | GYPTLLLFRR                 |           |         |                           |      | Mascot      |
| 1079.6248           | 1079.558    | -0.0668 | -62   | 395        | 403      | GYPTLLLFRR                 | 63        | 99.806  |                           |      | Mascot      |
| 1152.62             | 1152.5521   | -0.0679 | -59   | 261        | 269      | GYPTLLWFR                  |           |         |                           |      | Mascot      |
| 1152.62             | 1152.5521   | -0.0679 | -59   | 261        | 269      | GYPTLLWFR                  | 55        | 98.864  |                           |      | Mascot      |
| 1309.5604           | 1309.4818   | -0.0786 | -60   | 212        | 221      | FFAPWCGHCK                 |           |         | Carbamidomethyl (C)[6,9]  |      | Mascot      |
| 1325.5554           | 1325.4724   | -0.083  | -63   | 345        | 354      | FYAPWCGHCK                 | 59        | 99.549  | Carbamidomethyl (C)[6,9]  |      | Mascot      |
| 1325.5554           | 1325.4724   | -0.083  | -63   | 345        | 354      | FYAPWCGHCK                 |           |         | Carbamidomethyl (C)[6,9]  |      | Mascot      |
| 1965.8541           | 1965.7312   | -0.1229 | -63   | 245        | 260      | VDCTQHYELCSGNQVR           | 108       | 100     | Carbamidomethyl (C)[3,10] |      | Mascot      |
| 1965.8541           | 1965.7312   | -0.1229 | -63   | 245        | 260      | VDCTQHYELCSGNQVR           |           |         | Carbamidomethyl (C)[3,10] |      | Mascot      |
| 2193.155            | 2193.02     | -0.135  | -62   | 222        | 241      | ALAPTWEQLALGLEHSET<br>VK   |           |         |                           |      | Mascot      |
| 2225.0178           | 2224.8904   | -0.1274 | -57   | 95         | 113      | LQPTWNDLGDKNYSMED<br>AK    |           |         |                           |      | Mascot      |
| 2264.0547           | 2263.916    | -0.1387 | -61   | 242        | 260      | IGKVDCTQHYELCSGNQ<br>VR    |           |         | Carbamidomethyl (C)[6,13] |      | Mascot      |
| 2421.1284           | 2421.0378   | -0.0906 | -37   | 119        | 140      | VDCTAHSQVCSAQGVRG<br>YPTLK |           |         | Carbamidomethyl (C)[3,10] |      | Mascot      |

8 PREDICTED: thioresoxin domain-containing protein 5-like [Callithrix jacchus] gi|296197453 47624.7 5.82 9 337 100 285 100







|    |  |                                                                                                                         |             |         |       |            |          |                             |           |         |                      |  |  |  |  |  |  |      |        |      |  |
|----|--|-------------------------------------------------------------------------------------------------------------------------|-------------|---------|-------|------------|----------|-----------------------------|-----------|---------|----------------------|--|--|--|--|--|--|------|--------|------|--|
|    |  | 1176.6523                                                                                                               | 1176.5969   | -0.0554 | -27   | 5          | 13       | FVNDVWKR                    |           | 65      | 99.847               |  |  |  |  |  |  |      | Mascot |      |  |
|    |  | 1176.6523                                                                                                               | 1176.5969   | -0.0554 | -47   | 5          | 13       | FVNDVWKR                    |           |         |                      |  |  |  |  |  |  |      | Mascot |      |  |
|    |  | 1790.8953                                                                                                               | 1790.8096   | -0.0857 | -48   | 17         | 33       | GMISDLLGEGAVDQLTR           |           |         |                      |  |  |  |  |  |  |      | Mascot |      |  |
| 7  |  | RecName: Full-Plasminogen activator inhibitor 1; Short=PAI; Short=PAI-1; AltName: Full-Endothelial Peptide Information  |             |         |       |            |          |                             |           |         |                      |  |  |  |  |  |  |      |        |      |  |
|    |  | Calc. Mass                                                                                                              | Obsrv. Mass | ± da    | ± ppm | Start Seq. | End Seq. | Sequence                    | Ion Score | C. I. % | Modification         |  |  |  |  |  |  | Rank | Result | Type |  |
|    |  | 1108.5269                                                                                                               | 1108.4689   | -0.058  | -52   | 144        | 152      | QVDFSEVER                   | 66        | 99.88   |                      |  |  |  |  |  |  |      | Mascot |      |  |
|    |  | 1108.5269                                                                                                               | 1108.4689   | -0.058  | -52   | 144        | 152      | QVDFSEVER                   |           |         |                      |  |  |  |  |  |  |      | Mascot |      |  |
|    |  | 1264.6545                                                                                                               | 1264.5771   | -0.0774 | -61   | 198        | 208      | TPPKSGTHHR                  | 61        |         |                      |  |  |  |  |  |  |      | Mascot |      |  |
|    |  | 2318.2561                                                                                                               | 2318.1443   | -0.1118 | -48   | 345        | 367      | VKVEINESGTVASSSTAIL VSAR    |           |         |                      |  |  |  |  |  |  |      | Mascot |      |  |
|    |  | 2420.1914                                                                                                               | 2420.075    | -0.1164 | -48   | 102        | 122      | ELMGPWNNKEISTADAIF VQR      |           |         |                      |  |  |  |  |  |  |      | Mascot |      |  |
|    |  | 2436.1863                                                                                                               | 2436.0718   | -0.1145 | -47   | 102        | 122      | ELMGPWNNKEISTADAIF VQR      |           |         | Oxidation (M)[3]     |  |  |  |  |  |  |      | Mascot |      |  |
| 8  |  | Chain A, Solution Structure Of Rna Binding Domain In Eukaryotic Translation Initiation Factor 3 Sub Peptide Information |             |         |       |            |          |                             |           |         |                      |  |  |  |  |  |  |      |        |      |  |
|    |  | Calc. Mass                                                                                                              | Obsrv. Mass | ± da    | ± ppm | Start Seq. | End Seq. | Sequence                    | Ion Score | C. I. % | Modification         |  |  |  |  |  |  | Rank | Result | Type |  |
|    |  | 1031.5228                                                                                                               | 1031.418    | -0.1048 | -102  | 11         | 19       | RADDNATIR                   |           |         |                      |  |  |  |  |  |  |      | Mascot |      |  |
|    |  | 1081.5577                                                                                                               | 1081.5051   | -0.0526 | -49   | 58         | 66       | GFAIFSHRR                   | 58        |         |                      |  |  |  |  |  |  |      | Mascot |      |  |
|    |  | 1081.5577                                                                                                               | 1081.5051   | -0.0526 | -49   | 58         | 66       | GFAIFSHRR                   | 43        | 75.128  |                      |  |  |  |  |  |  |      | Mascot |      |  |
|    |  | 1237.6588                                                                                                               | 1237.5891   | -0.0697 | -56   | 58         | 67       | GFAIFSHRR                   |           |         |                      |  |  |  |  |  |  |      | Mascot |      |  |
|    |  | 1894.9657                                                                                                               | 1894.8781   | -0.0876 | -46   | 29         | 44       | ETQLQELRPFQGSISR            |           |         |                      |  |  |  |  |  |  |      | Mascot |      |  |
| 9  |  | PAI precursor polypeptide [Homo sapiens] Peptide Information                                                            |             |         |       |            |          |                             |           |         |                      |  |  |  |  |  |  |      |        |      |  |
|    |  | Calc. Mass                                                                                                              | Obsrv. Mass | ± da    | ± ppm | Start Seq. | End Seq. | Sequence                    | Ion Score | C. I. % | Modification         |  |  |  |  |  |  | Rank | Result | Type |  |
|    |  | 1108.5269                                                                                                               | 1108.4689   | -0.058  | -52   | 144        | 154      | QVDFSEVER                   | 66        | 99.88   |                      |  |  |  |  |  |  |      | Mascot |      |  |
|    |  | 1108.5269                                                                                                               | 1108.4689   | -0.058  | -52   | 146        | 154      | QVDFSEVER                   |           |         |                      |  |  |  |  |  |  |      | Mascot |      |  |
|    |  | 1567.7607                                                                                                               | 1567.6709   | -0.0898 | -57   | 311        | 323      | KPLENLGMTDMFR               |           |         | Oxidation (M)[8]     |  |  |  |  |  |  |      | Mascot |      |  |
|    |  | 2824.4233                                                                                                               | 2824.2827   | -0.1406 | -50   | 267        | 291      | EVLPSALTNLISAHVMISH WKGNMTR |           |         | Oxidation (M)[16,23] |  |  |  |  |  |  |      | Mascot |      |  |
| 10 |  | PREDICTED: hypothetical protein [Pan troglodytes] Peptide Information                                                   |             |         |       |            |          |                             |           |         |                      |  |  |  |  |  |  |      |        |      |  |
|    |  | Calc. Mass                                                                                                              | Obsrv. Mass | ± da    | ± ppm | Start Seq. | End Seq. | Sequence                    | Ion Score | C. I. % | Modification         |  |  |  |  |  |  | Rank | Result | Type |  |
|    |  | 882.5195                                                                                                                | 882.5389    | 0.0194  | 22    | 2          | 9        | HPAGILFK                    |           |         |                      |  |  |  |  |  |  |      | Mascot |      |  |
|    |  | 1081.5497                                                                                                               | 1081.5051   | -0.0446 | -41   | 240        | 250      | QKAGNEAAAHRR                |           |         |                      |  |  |  |  |  |  |      | Mascot |      |  |
|    |  | 1081.5497                                                                                                               | 1081.5051   | -0.0446 | -41   | 240        | 250      | QKAGNEAA                    |           |         |                      |  |  |  |  |  |  |      |        |      |  |



|           |                                                                       |                     |             |         |       |                  |          |                |                   |         |              |              |         |      |    |     |     |     |     |        |             |
|-----------|-----------------------------------------------------------------------|---------------------|-------------|---------|-------|------------------|----------|----------------|-------------------|---------|--------------|--------------|---------|------|----|-----|-----|-----|-----|--------|-------------|
| 8         | heterogeneous nuclear ribonucleoproteins A2/B1<br>[Pongo abelii]      | Peptide Information |             |         |       |                  |          |                |                   |         |              | gi 197101465 | 37380.7 | 8.98 | 11 | 219 | 100 | 131 | 100 |        |             |
|           |                                                                       | Calic. Mass         | Obsrv. Mass | ± da    | ± ppm | Start Seq.       | End Seq. | Sequence       | Ion Score         | C. I. % | Modification |              |         |      |    |     |     |     |     | Rank   | Result Type |
|           |                                                                       | 1013.4434           | 1013.3862   | -0.0572 | -56   | 204              | 213      | GGNFGFGDSR     | 27                | 0       |              |              |         |      |    |     |     |     |     | Mascot |             |
|           |                                                                       | 1013.4434           | 1013.3862   | -0.0572 | -56   | 204              | 213      | GGNFGFGDSR     |                   |         |              |              |         |      |    |     |     |     |     | Mascot |             |
|           |                                                                       | 1050.4414           | 1050.3857   | -0.0557 | -53   | 130              | 137      | DYFEEYK        |                   |         |              |              |         |      |    |     |     |     |     | Mascot |             |
|           |                                                                       | 1057.5889           | 1057.5242   | -0.0647 | -61   | 4                | 12       | TLETVPLER      |                   |         |              |              |         |      |    |     |     |     |     | Mascot |             |
|           |                                                                       | 1313.598            | 1313.5238   | -0.0742 | -56   | 201              | 213      | SGRGGNFGFGDSR  |                   |         |              |              |         |      |    |     |     |     |     | Mascot |             |
|           |                                                                       | 1313.5238           |             |         |       |                  |          |                |                   |         |              |              |         |      |    |     |     |     |     | Mascot |             |
|           |                                                                       | 1377.6294           | 1377.5554   | -0.074  | -54   | 214              | 228      | GGGNFGPGPGSNFR | 63                | 99.83   |              |              |         |      |    |     |     |     |     | Mascot |             |
|           |                                                                       | 1377.6294           | 1377.5554   | -0.074  | -54   | 214              | 228      | GGGNFGPGPGSNFR |                   |         |              |              |         |      |    |     |     |     |     | Mascot |             |
| 1648.8071 | 1648.7343                                                             | -0.0728             | -44         | 187     | 200   | ALSRQEMQEVQSSR   |          |                |                   | Mascot  |              |              |         |      |    |     |     |     |     |        |             |
| 1648.802  | 1664.7183                                                             | -0.0837             | -50         | 187     | 200   | ALSRQEMQEVQSSR   |          |                | Oxidation (M)[7]  | Mascot  |              |              |         |      |    |     |     |     |     |        |             |
| 1798.9221 | 1798.8301                                                             | -0.092              | -51         | 23      | 38    | LFIGLSPFETTESLR  |          |                |                   | Mascot  |              |              |         |      |    |     |     |     |     |        |             |
| 2020.9255 | 2020.9198                                                             | -0.0057             | -3          | 39      | 54    | NYEEDQWGLTDCVVMR |          |                | Oxidation (M)[15] | Mascot  |              |              |         |      |    |     |     |     |     |        |             |
| 2020.9255 | 2020.9198                                                             | -0.0057             | -3          | 39      | 54    | NYEEDQWGLTDCVVMR |          |                | Oxidation (M)[15] | Mascot  |              |              |         |      |    |     |     |     |     |        |             |
| 2189.9053 | 2189.7869                                                             | -0.1184             | -54         | 326     | 350   | NMGGPYGGGNYGPGGS |          |                |                   | Mascot  |              |              |         |      |    |     |     |     |     |        |             |
| 2205.9001 | 2205.7773                                                             | -0.1228             | -56         | 326     | 350   | NMGGPYGGGNYGPGGS | 42       | 74.576         | Oxidation (M)[2]  | Mascot  |              |              |         |      |    |     |     |     |     |        |             |
| 2205.9001 | 2205.7773                                                             | -0.1228             | -56         | 326     | 350   | NMGGPYGGGNYGPGGS |          |                | Oxidation (M)[2]  | Mascot  |              |              |         |      |    |     |     |     |     |        |             |
| 2270.9919 | 2270.8706                                                             | -0.1213             | -53         | 214     | 238   | GGGNFGPGPGSNFRG  |          |                |                   | Mascot  |              |              |         |      |    |     |     |     |     |        |             |
| 2277.155  | 2277.0312                                                             | -0.1238             | -54         | 154     | 173   | GFQVTFDDHDPVKIVL |          |                |                   | Mascot  |              |              |         |      |    |     |     |     |     |        |             |
| 2277.155  | 2277.0312                                                             | -0.1238             | -54         | 154     | 173   | GFQVTFDDHDPVKIVL |          |                |                   | Mascot  |              |              |         |      |    |     |     |     |     |        |             |
| 9         | heterogeneous nuclear ribonucleoproteins A2/B1<br>[Rattus norvegicus] | Peptide Information |             |         |       |                  |          |                |                   |         |              | gi 157265559 | 37454.7 | 8.97 | 11 | 219 | 100 | 131 | 100 |        |             |
|           |                                                                       | Calic. Mass         | Obsrv. Mass | ± da    | ± ppm | Start Seq.       | End Seq. | Sequence       | Ion Score         | C. I. % | Modification |              |         |      |    |     |     |     |     | Rank   | Result Type |
|           |                                                                       | 1013.4434           | 1013.3862   | -0.0572 | -56   | 204              | 213      | GGNFGFGDSR     | 27                | 0       |              |              |         |      |    |     |     |     |     | Mascot |             |
|           |                                                                       | 1013.4434           | 1013.3862   | -0.0572 | -56   | 204              | 213      | GGNFGFGDSR     |                   |         |              |              |         |      |    |     |     |     |     | Mascot |             |
|           |                                                                       | 1050.4414           | 1050.3857   | -0.0557 | -53   | 130              | 137      | DYFEEYK        |                   |         |              |              |         |      |    |     |     |     |     | Mascot |             |
|           |                                                                       | 1057.5889           | 1057.5242   | -0.0647 | -61   | 4                | 12       | TLETVPLER      |                   |         |              |              |         |      |    |     |     |     |     | Mascot |             |
|           |                                                                       | 1313.598            | 1313.5238   | -0.0742 | -56   | 201              | 213      | SGRGGNFGFGDSR  |                   |         |              |              |         |      |    |     |     |     |     | Mascot |             |
|           |                                                                       | 1313.598            | 1313.5238   | -0.0742 | -56   | 201              | 213      | SGRGGNFGFGDSR  |                   |         |              |              |         |      |    |     |     |     |     | Mascot |             |
|           |                                                                       | 1377.6294           | 1377.5554   | -0.074  | -54   | 214              | 228      | GGGNFGPGPGSNFR | 63                | 99.83   |              |              |         |      |    |     |     |     |     | Mascot |             |
|           |                                                                       | 1377.6294           | 1377.5554   | -0.074  | -54   | 214              | 228      | GGGNFGPGPGSNFR |                   |         |              |              |         |      |    |     |     |     |     | Mascot |             |
| 1410.6873 | 1410.6167                                                             | -0.0706             | -50         | 174     | 185   | YHTINGHNAEVR     |          |                |                   | Mascot  |              |              |         |      |    |     |     |     |     |        |             |
| 1648.8071 | 1648.7343                                                             | -0.0728             | -44         | 187     | 200   | ALSRQEMQEVQSSR   |          |                |                   | Mascot  |              |              |         |      |    |     |     |     |     |        |             |
| 1648.802  | 1664.7183                                                             | -0.0837             | -50         | 187     | 200   | ALSRQEMQEVQSSR   |          |                | Oxidation (M)[7]  | Mascot  |              |              |         |      |    |     |     |     |     |        |             |
| 1798.9221 | 1798.8301                                                             | -0.092              | -51         | 23      | 38    | LFIGLSPFETTESLR  |          |                |                   | Mascot  |              |              |         |      |    |     |     |     |     |        |             |
| 2020.9255 | 2020.9198                                                             | -0.0057             | -3          | 39      | 54    | NYEEDQWGLTDCVVMR |          |                | Oxidation (M)[15] | Mascot  |              |              |         |      |    |     |     |     |     |        |             |
| 2020.9255 | 2020.9198                                                             | -0.0057             | -3          | 39      | 54    | NYEEDQWGLTDCVVMR |          |                | Oxidation (M)[15] | Mascot  |              |              |         |      |    |     |     |     |     |        |             |
| 2189.9053 | 2189.7869                                                             | -0.1184             | -54         | 326     | 350   | NMGGPYGGGNYGPGGS |          |                |                   | Mascot  |              |              |         |      |    |     |     |     |     |        |             |
| 2205.9001 | 2205.7773                                                             | -0.1228             | -56         | 326     | 350   | NMGGPYGGGNYGPGGS | 42       | 74.576         | Oxidation (M)[2]  | Mascot  |              |              |         |      |    |     |     |     |     |        |             |
| 2205.9001 | 2205.7773                                                             | -0.1228             | -56         | 326     | 350   | NMGGPYGGGNYGPGGS |          |                | Oxidation (M)[2]  | Mascot  |              |              |         |      |    |     |     |     |     |        |             |
| 2270.     |                                                                       |                     |             |         |       |                  |          |                |                   |         |              |              |         |      |    |     |     |     |     |        |             |

|   |                                                                                                     |             |         |       |            |          |             |           |         |                  |      |             |
|---|-----------------------------------------------------------------------------------------------------|-------------|---------|-------|------------|----------|-------------|-----------|---------|------------------|------|-------------|
| 3 | 1390.6995                                                                                           | 1390.6516   | -0.0479 | -34   | 104        | 115      | LMTQAQLEEA  | Mascot    |         |                  |      |             |
|   | 1411.8268                                                                                           | 1411.7729   | -0.0539 | -38   | 279        | 290      | KIDGLLDIQI  | Mascot    |         |                  |      |             |
|   | 1597.8009                                                                                           | 1597.7473   | -0.0536 | -34   | 155        | 167      | YVFTDISYSIP | Mascot    |         |                  |      |             |
|   | 1882.9446                                                                                           | 1882.8778   | -0.0668 | -35   | 155        | 169      | YVFTDISYSIP | Mascot    |         |                  |      |             |
|   | PREDICTED: similar to Mitochondrial 28S ribosomal protein S22 (S22mt) (MRP-S22) isoform 1 [Canis fa |             |         |       |            |          |             |           |         |                  |      |             |
|   | Peptide Information                                                                                 |             |         |       |            |          |             |           |         |                  |      |             |
|   | Calc. Mass                                                                                          | Obsrv. Mass | ± da    | ± ppm | Start Seq. | End Seq. | Sequence    | Ion Score | C. I. % | Modification     | Rank | Result Type |
|   | 1039.5646                                                                                           | 1039.5212   | -0.0434 | -42   | 192        | 199      | MIQIYFPK    |           |         |                  |      | Mascot      |
|   | 1048.4807                                                                                           | 1048.4377   | -0.043  | -41   | 184        | 191      | ASVEERDR    |           |         |                  |      | Mascot      |
|   | 1211.6816                                                                                           | 1211.6367   | -0.0449 | -37   | 126        | 135      | LKMPVLEER   |           |         |                  |      | Mascot      |
|   | 1227.6765                                                                                           | 1227.6216   | -0.0549 | -45   | 126        | 135      | LKMPVLEER   |           |         | Oxidation (M)[3] |      | Mascot      |
|   | 1283.7318                                                                                           | 1283.6799   | -0.0519 | -40   | 281        | 291      | IDGLLDIQI   |           |         |                  |      | Mascot      |
|   | 1373.7899                                                                                           | 1373.7371   | -0.0528 | -38   | 171        | 182      | FIVREPSGTL  | 11        | 0       |                  |      | Mascot      |
|   | 1373.7899                                                                                           | 1373.7371   | -0.0528 | -38   | 171        | 182      | FIVREPSGTL  |           |         |                  |      | Mascot      |
|   | 1390.6995                                                                                           | 1390.6516   | -0.0479 | -34   | 105        | 116      | LMTQAQLEEA  |           |         |                  |      | Mascot      |
|   | 1411.8268                                                                                           | 1411.7729   | -0.0539 | -38   | 280        | 291      | KIDGLLDIQI  |           |         |                  |      | Mascot      |
|   | 1597.8009                                                                                           | 1597.7473   | -0.0536 | -34   | 156        | 168      | YVFTDISYSIP |           |         |                  |      | Mascot      |
|   | 1882.9446                                                                                           | 1882.8778   | -0.0668 | -35   | 155        | 170      | YVFTDISYSIP |           |         |                  |      | Mascot      |
|   | PREDICTED: similar to Mitochondrial 28S ribosomal protein S22 (S22mt) (MRP-S22) isoform 2 [Canis fa |             |         |       |            |          |             |           |         |                  |      |             |
|   | Peptide Information                                                                                 |             |         |       |            |          |             |           |         |                  |      |             |
|   | Calc. Mass                                                                                          | Obsrv. Mass | ± da    | ± ppm | Start Seq. | End Seq. | Sequence    | Ion Score | C. I. % | Modification     | Rank | Result Type |
|   | 1039.5646                                                                                           | 1039.5212   | -0.0434 | -42   | 191        | 198      | MIQIYFPK    |           |         |                  |      | Mascot      |
|   | 1048.4807                                                                                           | 1048.4377   | -0.043  | -41   | 183        | 190      | ASVEERDR    |           |         |                  |      | Mascot      |
|   | 1211.6816                                                                                           | 1211.6367   | -0.0449 | -37   | 125        | 134      | LKMPVLEER   |           |         |                  |      | Mascot      |
|   | 1227.6765                                                                                           | 1227.6216   | -0.0549 | -45   | 125        | 134      | LKMPVLEER   |           |         | Oxidation (M)[3] |      | Mascot      |
|   | 1283.7318                                                                                           | 1283.6799   | -0.0519 | -40   | 280        | 290      | IDGLLDIQI   |           |         |                  |      | Mascot      |
|   | 1373.7899                                                                                           | 1373.7371   | -0.0528 | -38   | 170        | 181      | FIVREPSGTL  | 11        | 0       |                  |      | Mascot      |
|   | 1373.7899                                                                                           | 1373.7371   | -0.0528 | -38   | 170        | 181      | FIVREPSGTL  |           |         |                  |      | Mascot      |
|   | 1390.6995                                                                                           | 1390.6516   | -0.0479 | -34   | 104        | 115      | LMTQAQLEEA  |           |         |                  |      | Mascot      |
|   | 1411.8268                                                                                           | 1411.7729   | -0.0539 | -38   | 279        | 290      | KIDGLLDIQI  |           |         |                  |      | Mascot      |
|   | 1597.8009                                                                                           | 1597.7473   | -0.0536 | -34   | 155        | 167      | YVFTDISYSIP |           |         |                  |      | Mascot      |
|   | 1882.9446                                                                                           | 1882.8778   | -0.0668 | -35   | 155        | 169      | YVFTDISYSIP |           |         |                  |      | Mascot      |
|   | PREDICTED: mitochondrial ribosomal protein S22 isoform 2 [Pan troglodytes]                          |             |         |       |            |          |             |           |         |                  |      |             |
|   | Peptide Information                                                                                 |             |         |       |            |          |             |           |         |                  |      |             |
|   | Calc. Mass                                                                                          | Obsrv. Mass | ± da    | ± ppm | Start Seq. | End Seq. | Sequence    | Ion Score | C. I. % | Modification     | Rank | Result Type |
|   | 1039.5055                                                                                           | 1039.5212   | 0.0157  | 15    | 231        | 238      | TYEDIDKR    |           |         |                  |      | Mascot      |
|   | 1048.4807                                                                                           | 1048.4377   | -0.043  | -41   | 184        | 191      | ASVEERDR    |           |         |                  |      | Mascot      |
|   | 1211.6816                                                                                           | 1211.6367   | -0.0449 | -37   | 126        | 135      | LKMPVLEER   |           |         |                  |      | Mascot      |
|   | 1227.6765                                                                                           | 1227.6216   | -0.0549 | -45   | 126        | 135      | LKMPVLEER   |           |         | Oxidation (M)[3] |      | Mascot      |
|   | 1283.7318                                                                                           | 1283.6799   | -0.0519 | -40   | 263        | 273      | IDGLLDIQI   |           |         |                  |      | Mascot      |
|   | 1373.7899                                                                                           | 1373.7371   | -0.0528 | -38   | 171        | 182      | FIVREPSGTL  | 11        | 0       |                  |      | Mascot      |
|   | 1373.7899                                                                                           | 1373.7371   | -0.0528 | -38   | 171        | 182      | FIVREPSGTL  |           |         |                  |      | Mascot      |
|   | 1390.6995                                                                                           | 1390.6516   | -0.0479 | -34   | 105        | 116      | LMTQAQLEEA  |           |         |                  |      | Mascot      |
|   | 1411.8268                                                                                           | 1411.7729   | -0.0539 | -38   | 262        | 273      | KIDGLLDIQI  |           |         |                  |      | Mascot      |
|   | 1597.8009                                                                                           | 1597.7473   | -0.0536 | -34   | 156        | 168      | YVFTDISYSIP |           |         |                  |      | Mascot      |
|   | 1882.9446                                                                                           | 1882.8778   | -0.0668 | -35   | 156        | 170      | YVFTDISYSIP |           |         |                  |      | Mascot      |
|   | PREDICTED: mitochondrial ribosomal protein S22 isoform 4 [Pan troglodytes]                          |             |         |       |            |          |             |           |         |                  |      |             |
|   | Peptide Information                                                                                 |             |         |       |            |          |             |           |         |                  |      |             |
|   | Calc. Mass                                                                                          | Obsrv. Mass | ± da    | ± ppm | Start Seq. | End Seq. | Sequence    | Ion Score | C. I. % | Modification     | Rank | Result Type |
|   | 1039.5055                                                                                           | 1039.5212   | 0.0157  | 15    | 249        | 256      | TYEDIDKR    |           |         |                  |      | Mascot      |
|   | 1048.4807                                                                                           | 1048.4377   | -0.043  | -41   | 184        | 191      | ASVEERDR    |           |         |                  |      | Mascot      |
|   | 1211.6816                                                                                           | 1211.6367   | -0.0449 | -37   | 126        | 135      | LKMPVLEER   |           |         |                  |      | Mascot      |
|   | 1227.6765                                                                                           | 1227.6216   | -0.0549 | -45   | 126        | 135      | LKMPVLEER   |           |         | Oxidation (M)[3] |      | Mascot      |
|   | 1283.7318                                                                                           | 1283.6799   | -0.0519 | -40   | 281        | 291      | IDGLLDIQI   |           |         |                  |      | Mascot      |
|   | 1373.7899                                                                                           | 1373.7371   | -0.0528 | -38   | 171        | 182      | FIVREPSGTL  | 11        | 0       |                  |      | Mascot      |
|   | 1373.7899                                                                                           | 1373.7371   | -0.0528 | -38   | 171        | 182      | FIVREPSGTL  |           |         |                  |      | Mascot      |
|   | 1390.6995                                                                                           | 1390.6516   | -0.0479 | -34   | 105        | 116      | LMTQAQLEEA  |           |         |                  |      | Mascot      |
|   | 1411.8268                                                                                           | 1411.7729   | -0.0539 | -38   | 280        | 291      | KIDGLLDIQI  |           |         |                  |      | Mascot      |
|   | 1597.8009                                                                                           | 1597.7473   | -0.0536 | -34   | 156        | 168      | YVFTDISYSIP |           |         |                  |      | Mascot      |
|   | 1882.9446                                                                                           | 1882.8778   | -0.0668 | -35   | 156        | 170      | YVFTDISYSIP |           |         |                  |      | Mascot      |
|   | 28S ribosomal protein S22, mitochondrial [Homo sapiens]                                             |             |         |       |            |          |             |           |         |                  |      |             |
|   | Peptide Information                                                                                 |             |         |       |            |          |             |           |         |                  |      |             |
|   | Calc. Mass                                                                                          | Obsrv. Mass | ± da    | ± ppm | Start Seq. | End Seq. | Sequence    | Ion Score | C. I. % | Modification     | Rank | Result Type |
|   | 1039.5055                                                                                           | 1039.5212   | 0.0157  | 15    | 249        | 256      | TYEDIDKR    |           |         |                  |      | Mascot      |
|   | 1048.4807                                                                                           | 1048.4377   | -0.043  | -41   | 184        | 191      | ASVEERDR    |           |         |                  |      | Mascot      |
|   | 1211.6816                                                                                           | 1211.6367   | -0.0449 | -37   | 126        | 135      | LKMPVLEER   |           |         |                  |      | Mascot      |
|   | 1227.6765                                                                                           | 1227.6216   | -0.0549 | -45   | 126        | 135      | LKMPVLEER   |           |         | Oxidation (M)[3] |      | Mascot      |
|   | 1283.7318                                                                                           | 1283.6799   | -0.0519 | -40   | 281        | 291      | IDGLLDIQI   |           |         |                  |      | Mascot      |
|   | 1373.7899                                                                                           | 1373.7371   | -0.0528 | -38   | 171        | 182      | FIVREPSGTL  | 11        | 0       |                  |      | Mascot      |
|   | 1373.7899                                                                                           | 1373.7371   | -0.0528 | -38   | 171        | 182      | FIVREPSGTL  |           |         |                  |      | Mascot      |
|   | 1390.6995                                                                                           | 1390.6516   | -0.0479 | -34   | 105        | 116      | LMTQAQLEEA  |           |         |                  |      | Mascot      |
|   | 1411.8268                                                                                           | 1411.7729   | -0.0539 | -38   | 280        | 291      | KIDGLLDIQI  |           |         |                  |      | Mascot      |
|   | 1597.8009                                                                                           | 1597.7473   | -0.0536 | -34   | 156        | 168      | YVFTDISYSIP |           |         |                  |      | Mascot      |
|   | 1882.9446                                                                                           | 1882.8778   | -0.0668 | -35   | 156        | 170      | YVFTDISYSIP |           |         |                  |      | Mascot      |
|   | PREDICTED: 28S ribosomal protein S22, mitochondrial isoform 6 [Macaca mulatta]                      |             |         |       |            |          |             |           |         |                  |      |             |
|   | Peptide Information                                                                                 |             |         |       |            |          |             |           |         |                  |      |             |
|   | Calc. Mass                                                                                          | Obsrv. Mass | ± da    | ± ppm | Start Seq. | End Seq. | Sequence    | Ion Score | C. I. % | Modification     | Rank | Result Type |
|   | 1039.5646                                                                                           | 1039.5212   | -0.0434 | -42   | 217        | 224      | MIQIYFPK    |           |         |                  |      | Mascot      |
|   | 1048.4807                                                                                           | 1048.4377   | -0.043  | -41   | 209        | 216      | ASVEERDR    |           |         |                  |      | Mascot      |
|   | 1211.6816                                                                                           | 1211.6367   | -0.0449 | -37   | 151        | 160      | LKMPVLEER   |           |         |                  |      | Mascot      |
|   | 1227.6765                                                                                           | 1227.6216   | -0.0549 | -45   | 151        | 160      | LKMPVLEER   |           |         | Oxidation (M)[3] |      | Mascot      |
|   | 1283.7318                                                                                           | 1283.6799   | -0.0519 | -40   | 306        | 316      | IDGLLDIQI   |           |         |                  |      | Mascot      |
|   | 1373.7899                                                                                           | 1373.7371   | -0.0528 | -38   | 196        | 207      | FIVREPSGTL  | 11        | 0       |                  |      | Mascot      |
|   | 1373.7899                                                                                           | 1373.7371   | -0.0528 | -38   | 196        | 207      | FIVREPSGTL  |           |         |                  |      | Mascot      |
|   | 1390.6995                                                                                           | 1390.6516   | -0.0479 | -34   | 130        | 141      | LMTQAQLEEA  |           |         |                  |      | Mascot      |
|   | 1411.8268                                                                                           | 1411.7729   | -0.0539 | -38   | 305        | 316      | KIDGLLDIQI  |           |         |                  |      | Mascot      |
|   | 1597.8009                                                                                           | 1597.7473   | -0.0536 | -34   | 181        | 193      | YVFTDISYSIP |           |         |                  |      | Mascot      |
|   | 1882.9446                                                                                           | 1882.8778   | -0.0668 | -35   | 181        | 195      | YVFTDISYSIP |           |         |                  |      | Mascot      |
|   | mitochondrial ribosomal protein S22, isoform CRA_a [Homo sapiens]                                   |             |         |       |            |          |             |           |         |                  |      |             |
|   | Peptide Information                                                                                 |             |         |       |            |          |             |           |         |                  |      |             |
|   | Calc. Mass                                                                                          | Obsrv. Mass | ± da    | ± ppm | Start Seq. | End Seq. | Sequence    | Ion Score | C. I. % | Modification     | Rank | Result Type |
|   | 1039.5055                                                                                           | 1039.5212   | 0.0157  | 15    | 248        | 255      | TYEDIDKR    |           |         |                  |      | Mascot      |
|   | 1048.4807                                                                                           | 1048.4377   | -0.043  | -41   | 183        | 190      | ASVEERDR    |           |         |                  |      | Mascot      |
|   | 1211.6816                                                                                           | 1211.6367   | -0.0449 | -37   | 125        | 134      | LKMPVLEER   |           |         |                  |      | Mascot      |
|   | 1227.6765                                                                                           | 1227.6216   | -0.0549 | -45   | 125        | 134      | LKMPVLEER   |           |         | Oxidation (M)[3] |      | Mascot      |
|   | 1283.7318                                                                                           | 1283.6799   | -0.0519 | -40   | 280        | 290      | IDGLLDIQI   |           |         |                  |      | Mascot      |
|   | 1373.7899                                                                                           | 1373.7371   | -0.0528 | -38   | 170        | 181      | FIVREPSGTL  | 11        | 0       |                  |      | Mascot      |
|   | 1373.7899                                                                                           | 1373.7371   | -0.0528 | -38   | 170        | 181      | FIVREPSGTL  |           |         |                  |      | Mascot      |
|   | 1390.6995                                                                                           | 1390.6516   | -0.0479 | -34   | 104        | 115      | LMTQAQLEEA  |           |         |                  |      | Mascot      |
|   | 1411.8268                                                                                           | 1411.7729   | -0.0539 | -38   | 279        | 290      | KIDGLLDIQI  |           |         |                  |      | Mascot      |
|   | 1597.8009                                                                                           | 1597.7473   | -0.0536 | -34   | 155        | 167      | YVFTDISYSIP |           |         |                  |      | Mascot      |
|   | 1882.9446                                                                                           | 1882.8778   | -0.0668 | -35   | 155        | 169      | YVFTDISYSIP |           |         |                  |      | Mascot      |
|   | DNA (cytosine-5)-methyltransferase 1 [Bos taurus]                                                   |             |         |       |            |          |             |           |         |                  |      |             |
|   | Peptide Information                                                                                 |             |         |       |            |          |             |           |         |                  |      |             |
|   | Calc. Mass                                                                                          | Obsrv. Mass | ± da    | ± ppm | Start Seq. | End Seq. | Sequence    | Ion Score | C. I. % | Modification     | Rank | Result Type |
|   | 1039.5646                                                                                           | 1039.5212   | -0.0434 | -42   | 217        | 224      | MIQIYFPK    |           |         |                  |      | Mascot      |
|   | 1048.4807                                                                                           | 1048.4377   | -0.043  | -41   | 209        | 216      | ASVEERDR    |           |         |                  |      | Mascot      |
|   | 1211.6816                                                                                           | 1211.6367   | -0.0449 | -37   | 151        | 160      | LKMPVLEER   |           |         |                  |      | Mascot      |
|   | 1227.6765                                                                                           | 1227.6216   | -0.0549 | -45   | 151        | 160      | LKMPVLEER   |           |         | Oxidation (M)[3] |      | Mascot      |
|   | 1283.7318                                                                                           | 1283.6799   | -0.0519 | -40   | 306        | 316      | IDGLLDIQI   |           |         |                  |      | Mascot      |
|   | 1373.7899                                                                                           | 1373.7371   | -0.0528 | -38   | 196        | 207      | FIVREPSGTL  | 11        | 0       |                  |      | Mascot      |
|   | 1373.7899                                                                                           | 1373.7371   | -0.0528 | -38   | 196        | 207      | FIVREPSGTL  |           |         |                  |      | Mascot      |
|   | 1390.6995                                                                                           | 1390.6516   | -0.0479 | -34   | 130        | 141      | LMTQAQLEEA  |           |         |                  |      | Mascot      |
|   | 1411.8268                                                                                           | 1411.7729   | -0.0539 | -38   | 305        | 316      | KIDGLLDIQI  |           |         |                  |      | Mascot      |
|   | 1597.8009                                                                                           | 1597.7473   | -0.0536 | -34   | 181        | 193      | YVFTDISYSIP |           |         |                  |      | Mascot      |
|   | 1882.9446                                                                                           | 1882.8778   | -0.0668 | -35   | 181        | 195      | YVFTDISYSIP |           |         |                  |      | Mascot      |
|   | DNA (cytosine-5)-methyltransferase 1 [Bos taurus]                                                   |             |         |       |            |          |             |           |         |                  |      |             |
|   | Peptide Information                                                                                 |             |         |       |            |          |             |           |         |                  |      |             |
|   | Calc. Mass                                                                                          | Obsrv. Mass | ± da    | ± ppm | Start Seq. | End Seq. | Sequence    | Ion Score | C. I. % | Modification     | Rank | Result Type |
|   | 1039.5646                                                                                           | 1039.5212   | -0.0434 | -42   | 217        | 224      |             |           |         |                  |      |             |

|           |           |         |      | Seq. | Seq. | Score              |    |   |                                            |  |        |
|-----------|-----------|---------|------|------|------|--------------------|----|---|--------------------------------------------|--|--------|
| 1039.4481 | 1039.5212 | 0.0731  | 70   | 687  | 694  | RCPNMAWK           |    |   | Carbamidomethyl (C)[2], Oxidation (M)[5,7] |  | Mascot |
| 1048.4703 | 1048.4377 | -0.0326 | -31  | 887  | 895  | YKFCASCAR          |    |   |                                            |  | Mascot |
| 1176.5565 | 1176.5099 | -0.0466 | -40  | 1366 | 1375 | DTMSDLPEIR         |    |   |                                            |  | Mascot |
|           | 1176.5099 |         |      |      |      |                    |    |   |                                            |  | Mascot |
| 1176.5929 | 1176.5099 | -0.083  | -71  | 1335 | 1345 | ACQLSVVVDDK        | 14 | 0 |                                            |  | Mascot |
| 1211.6055 | 1211.6367 | 0.0312  | 26   | 1176 | 1186 | FNNPGSTVFTK        |    |   |                                            |  | Mascot |
| 1223.5903 | 1223.59   | -0.0003 | 0    | 879  | 888  | TOPTEDNKYK         |    |   |                                            |  | Mascot |
| 1223.5903 | 1223.59   | -0.0003 | 0    | 879  | 888  | TOPTEDNKYK         |    |   |                                            |  | Mascot |
| 1227.7671 | 1227.6216 | -0.1455 | -119 | 581  | 592  | DLKLAGVTLGK        |    |   |                                            |  | Mascot |
| 1373.6123 | 1373.7371 | 0.1248  | 91   | 889  | 900  | FCASCARLAEMR       |    |   | Oxidation (M)[11]                          |  | Mascot |
| 1373.6123 | 1373.7371 | 0.1248  | 91   | 889  | 900  | FCASCARLAEMR       |    |   | Oxidation (M)[11]                          |  | Mascot |
| 1411.8055 | 1411.7729 | -0.0326 | -23  | 44   | 54   | EKUNLHFLRL         |    |   |                                            |  | Mascot |
| 1535.79   | 1535.7626 | -0.0274 | -18  | 1422 | 1434 | MRHIPLAPGSDWR      |    |   |                                            |  | Mascot |
| 1802.7974 | 1802.8956 | 0.0982  | 54   | 263  | 279  | DVRPGGAGAEINNEGDK  |    |   |                                            |  | Mascot |
|           |           |         |      |      |      |                    |    |   |                                            |  |        |
| 2070.8499 | 2070.8901 | 0.0402  | 19   | 1212 | 1231 | GDVEMLCGGPPCOGFS   |    |   | Oxidation (M)[5]                           |  | Mascot |
|           |           |         |      |      |      | GMNR               |    |   |                                            |  |        |
| 2429.0632 | 2429.1438 | 0.0806  | 33   | 258  | 279  | EFPORDVVRPGGAQAEIN |    |   |                                            |  | Mascot |
|           |           |         |      |      |      | NEGEDI             |    |   |                                            |  |        |
| 2429.0632 | 2429.1438 | 0.0806  | 33   | 258  | 279  | EFPORDVVRPGGAQAEIN |    |   |                                            |  | Mascot |
|           |           |         |      |      |      | NEGEDI             |    |   |                                            |  |        |
| 2497.1816 | 2497.1287 | -0.0529 | -21  | 1513 | 1534 | LEWDGFFSTTVTNPEPM  |    |   |                                            |  | Mascot |
|           |           |         |      |      |      | GKQGR              |    |   |                                            |  |        |

| Gel Idx/Pos         |                                                                | 8/A15       |         | Instr./Gel Origin      |            | AB4700/110211A |                    | Process Sta |         | Analysis Succeeded                         |            |               |                       |                 |                   |
|---------------------|----------------------------------------------------------------|-------------|---------|------------------------|------------|----------------|--------------------|-------------|---------|--------------------------------------------|------------|---------------|-----------------------|-----------------|-------------------|
| Plate [#]           | Name                                                           | [1] 8907    |         | Instrument Sample Name |            |                |                    | Spectra     |         | 8                                          |            |               |                       |                 |                   |
| Rank                | Protein Name                                                   |             |         | Species                |            | Accession No.  |                    | Protein MW  |         | protein PI                                 | Pep. Count | Protein Score | Protein Score C. I. % | Total Ion Score | Total Ion C. I. % |
| 1                   | Glutaredoxin-3 OS=Bos taurus GN=GLRX3 PE=2 SV=1                |             |         |                        |            | GLRX3_BOVIN    |                    | 37274.1     |         | 5.56                                       | 4          | 71            | 99.445                | 54              | 99.807            |
| Peptide Information |                                                                |             |         |                        |            |                |                    |             |         |                                            |            |               |                       |                 |                   |
| Calc. Mass          |                                                                | Obsrv. Mass | ± da    | ± ppm                  | Start Seq. | End Seq.       | Sequence           | Ion Score   | C. I. % | Modification                               |            | Rank          | Result Type           |                 |                   |
| 1535.8176           |                                                                | 1535.7461   | -0.0715 | -47                    | 96         | 109            | IDRLDGAHAPELTK     |             |         |                                            |            |               | Mascot                |                 |                   |
| 1729.8584           |                                                                | 1729.7739   | -0.0845 | -49                    | 294        | 307            | AYSNNWPTYQLYVK     |             |         |                                            |            |               | Mascot                |                 |                   |
| 2069.9563           |                                                                | 2069.8647   | -0.0916 | -44                    | 171        | 187            | HNIOQSSFDIFSDEEVR  |             |         |                                            |            |               | Mascot                |                 |                   |
| 2496.2153           |                                                                | 2496.0964   | -0.1189 | -48                    | 171        | 191            | HNIOQSSFDIFSDEEVRQ |             |         |                                            |            |               | Mascot                |                 |                   |
|                     |                                                                |             |         |                        |            |                | GLK                |             |         |                                            |            |               |                       |                 |                   |
| 2496.2153           |                                                                | 2496.0964   | -0.1189 | -48                    | 171        | 191            | HNIOQSSFDIFSDEEVRQ | 54          | 99.807  |                                            |            |               | Mascot                |                 |                   |
|                     |                                                                |             |         |                        |            |                | GLK                |             |         |                                            |            |               |                       |                 |                   |
| 2                   | Glutaredoxin-3 OS=Homo sapiens GN=GLRX3 PE=1 SV=2              |             |         |                        |            | GLRX3_HUMAN    |                    | 37408.2     |         | 5.31                                       | 4          | 68            | 99.036                | 54              | 99.807            |
| Peptide Information |                                                                |             |         |                        |            |                |                    |             |         |                                            |            |               |                       |                 |                   |
| Calc. Mass          |                                                                | Obsrv. Mass | ± da    | ± ppm                  | Start Seq. | End Seq.       | Sequence           | Ion Score   | C. I. % | Modification                               |            | Rank          | Result Type           |                 |                   |
| 1535.7709           |                                                                | 1535.7461   | -0.0248 | -16                    | 159        | 171            | CGFSKOMVEILHK      |             |         |                                            |            |               | Mascot                |                 |                   |
| 1729.8584           |                                                                | 1729.7739   | -0.0845 | -49                    | 295        | 308            | AYSNNWPTYQLYVK     |             |         | Oxidation (M)[7]                           |            |               | Mascot                |                 |                   |
| 2069.9563           |                                                                | 2069.8647   | -0.0916 | -44                    | 172        | 188            | HNIOQSSFDIFSDEEVR  |             |         |                                            |            |               | Mascot                |                 |                   |
| 2496.2153           |                                                                | 2496.0964   | -0.1189 | -48                    | 172        | 192            | HNIOQSSFDIFSDEEVRQ |             |         |                                            |            |               | Mascot                |                 |                   |
|                     |                                                                |             |         |                        |            |                | GLK                |             |         |                                            |            |               |                       |                 |                   |
| 2496.2153           |                                                                | 2496.0964   | -0.1189 | -48                    | 172        | 192            | HNIOQSSFDIFSDEEVRQ | 54          | 99.807  |                                            |            |               | Mascot                |                 |                   |
|                     |                                                                |             |         |                        |            |                | GLK                |             |         |                                            |            |               |                       |                 |                   |
| 3                   | Glutaredoxin-3 OS=Mus musculus GN=Glxr3 PE=1 SV=1              |             |         |                        |            | GLRX3_MOUSE    |                    | 37754.4     |         | 5.42                                       | 3          | 64            | 97.156                | 54              | 99.807            |
| Peptide Information |                                                                |             |         |                        |            |                |                    |             |         |                                            |            |               |                       |                 |                   |
| Calc. Mass          |                                                                | Obsrv. Mass | ± da    | ± ppm                  | Start Seq. | End Seq.       | Sequence           | Ion Score   | C. I. % | Modification                               |            | Rank          | Result Type           |                 |                   |
| 1535.7709           |                                                                | 1535.7461   | -0.0248 | -16                    | 161        | 173            | CGFSKOMVEILHK      |             |         |                                            |            |               | Mascot                |                 |                   |
| 2069.9563           |                                                                | 2069.8647   | -0.0916 | -44                    | 174        | 190            | HNIOQSSFDIFSDEEVR  |             |         | Oxidation (M)[7]                           |            |               | Mascot                |                 |                   |
| 2496.2153           |                                                                | 2496.0964   | -0.1189 | -48                    | 174        | 194            | HNIOQSSFDIFSDEEVRQ |             |         |                                            |            |               | Mascot                |                 |                   |
|                     |                                                                |             |         |                        |            |                | GLK                |             |         |                                            |            |               |                       |                 |                   |
| 2496.2153           |                                                                | 2496.0964   | -0.1189 | -48                    | 174        | 194            | HNIOQSSFDIFSDEEVRQ | 54          | 99.807  |                                            |            |               | Mascot                |                 |                   |
|                     |                                                                |             |         |                        |            |                | GLK                |             |         |                                            |            |               |                       |                 |                   |
| 4                   | Uroporphyrinogen decarboxylase OS=Ovis aries GN=UROD PE=1 SV=1 |             |         |                        |            | DCUP_SHEEP     |                    | 40785.8     |         | 5.82                                       | 9          | 56            | 85.412                |                 |                   |
| Peptide Information |                                                                |             |         |                        |            |                |                    |             |         |                                            |            |               |                       |                 |                   |
| Calc. Mass          |                                                                | Obsrv. Mass | ± da    | ± ppm                  | Start Seq. | End Seq.       | Sequence           | Ion Score   | C. I. % | Modification                               |            | Rank          | Result Type           |                 |                   |
| 879.5086            |                                                                | 879.4913    | -0.0173 | -20                    | 232        | 238            | FALPYIR            |             |         |                                            |            |               | Mascot                |                 |                   |
| 1202.5259           |                                                                | 1202.4686   | -0.0573 | -48                    | 51         | 60             | AAQDFFSTCR         |             |         | Carbamidomethyl (C)[9]                     |            |               | Mascot                |                 |                   |
| 1287.6692           |                                                                | 1287.6096   | -0.0596 | -46                    | 5          | 15             | ESRPGGFPELK        |             |         |                                            |            |               | Mascot                |                 |                   |
| 1413.712            |                                                                | 1413.6459   | -0.0661 | -47                    | 105        | 116            | GPSFPEPLREER       |             |         |                                            |            |               | Mascot                |                 |                   |
| 1673.7986           |                                                                | 1673.728    | -0.0706 | -42                    | 61         | 74             | SPEACGELTLOPLR     |             |         | Carbamidomethyl (C)[5,6]                   |            |               | Mascot                |                 |                   |
| 1795.9714           |                                                                | 1795.8926   | -0.0788 | -44                    | 180        | 193            | WLYQRPOASHQLLR     |             |         |                                            |            |               | Mascot                |                 |                   |
| 1829.8997           |                                                                | 1829.823    | -0.0767 | -42                    | 61         | 75             | SPEACCELTOPLRR     |             |         | Carbamidomethyl (C)[5,6]                   |            |               | Mascot                |                 |                   |
| 1971.8364           |                                                                | 1971.7529   | -0.0835 | -42                    | 22         | 37             | AAWGEETDYTPVWCMR   |             |         | Carbamidomethyl (C)[14]                    |            |               | Mascot                |                 |                   |
| 2034.0403           |                                                                | 2033.9486   | -0.0917 | -45                    | 5          | 21             | ESRPGGFPELKNDFTLR  |             |         |                                            |            |               | Mascot                |                 |                   |
| 5                   | Integrin beta-3 OS=Homo sapiens GN=ITGB3 PE=2 SV=2             |             |         |                        |            | ITB3_HUMAN     |                    | 87000.4     |         | 5.09                                       | 11         | 48            |                       | 0               |                   |
| Peptide Information |                                                                |             |         |                        |            |                |                    |             |         |                                            |            |               |                       |                 |                   |
| Calc. Mass          |                                                                | Obsrv. Mass | ± da    | ± ppm                  | Start Seq. | End Seq.       | Sequence           | Ion Score   | C. I. % | Modification                               |            | Rank          | Result Type           |                 |                   |
| 882.4791            |                                                                | 882.538     | 0.0589  | 67                     | 280        | 287            | THIALDGR           | 8           | 0       |                                            |            |               | Mascot                |                 |                   |
| 882.4791            |                                                                | 882.538     | 0.0589  | 67                     | 280        | 287            | THIALDGR           |             |         |                                            |            |               | Mascot                |                 |                   |
| 1176.5427           |                                                                | 1176.4845   | -0.0582 | -49                    | 208        | 217            | TTCLPMFGYK         |             |         | Oxidation (M)[6]                           |            |               | Mascot                |                 |                   |
| 1176.5427           |                                                                | 1176.4845   | -0.0582 | -49                    | 208        | 217            | TTCLPMFGYK         |             |         | Oxidation (M)[6]                           |            |               | Mascot                |                 |                   |
| 1185.4738           |                                                                | 1185.5535   | 0.0797  | 67                     | 627        | 637            | CPTCPDACTFK        |             |         |                                            |            |               | Mascot                |                 |                   |
| 1223.5215           |                                                                | 1223.5765   | 0.055   | 45                     | 693        | 702            | FQYEDSSGK          |             |         |                                            |            |               | Mascot                |                 |                   |
| 1223.5215           |                                                                | 1223.5765   | 0.055   | 45                     | 693        | 702            | FQYEDSSGK          |             |         |                                            |            |               | Mascot                |                 |                   |
| 1532.73             |                                                                | 1532.726    | -0.004  | -3                     | 99         | 113            | GSQDSSQVTOVSPOR    |             |         |                                            |            |               | Mascot                |                 |                   |
| 1729.7666           |                                                                | 1729.7739   | 0.0073  | 4                      | 590        | 606            | TDTCMSSNGLLCSGRGK  |             |         |                                            |            |               | Mascot                |                 |                   |
| 1795.7448           |                                                                | 1795.8926   | 0.1478  | 82                     | 542        | 556            | ITGKYCECDFSCVR     |             |         | Carbamidomethyl (C)[6]                     |            |               | Mascot                |                 |                   |
| 1829.7073           |                                                                | 1829.823    | 0.1157  | 63                     | 525        | 541            | GECLGQCVCVCHSSDFGK |             |         | Carbamidomethyl (C)[3]                     |            |               | Mascot                |                 |                   |
| 2069.8789           |                                                                | 2069.8647   | -0.0142 | -7                     | 243        | 261            | DAPEGGFDAIMQATVCD  |             |         | Carbamidomethyl (C)[16], Oxidation (M)[11] |            |               | Mascot                |                 |                   |
|                     |                                                                |             |         |                        |            |                | EK                 |             |         |                                            |            |               |                       |                 |                   |
| 2210.9294           |                                                                | 2211.0037   | 0.0743  | 34                     | 685        | 702            | NEDDCVVRFYQYEDSSG  |             |         | Carbamidomethyl (C)[5]                     |            |               | Mascot                |                 |                   |
|                     |                                                                |             |         |                        |            |                | K                  |             |         |                                            |            |               |                       |                 |                   |
| 2380.9333           |                                                                | 2381.0537   | 0.1204  | 51                     | 605        | 626            | GKCEGSGSCVCIQPSYG  |             |         | Carbamidomethyl (C)[3,5]                   |            |               | Mascot                |                 |                   |
|                     |                                                                |             |         |                        |            |                | DTECK              |             |         |                                            |            |               |                       |                 |                   |
| 6                   | Coatomer subunit delta OS=Bos taurus GN=ARCN1 PE=1 SV=1        |             |         |                        |            | COPD_BOVIN     |                    | 57238.2     |         | 5.89                                       | 9          | 43            |                       | 0               |                   |
| Peptide Information |                                                                |             |         |                        |            |                |                    |             |         |                                            |            |               |                       |                 |                   |
| Calc. Mass          |                                                                | Obsrv. Mass | ± da    | ± ppm                  | Start Seq. | End Seq.       | Sequence           | Ion Score   | C. I. % | Modification                               |            | Rank          | Result Type           |                 |                   |
| 879.4392            |                                                                | 879.4913    | 0.0521  | 59                     | 89         | 95             | VIPEYCR            |             |         |                                            |            |               | Mascot                |                 |                   |
| 988.517             |                                                                | 988.5411    | 0.0241  | 24                     | 146        | 153            | AVRETOER           |             |         |                                            |            |               | Mascot                |                 |                   |
| 1045.6074           |                                                                | 1045.5051   | -0.1023 | -98                    | 2          | 11             | VLLAAAVCTK         |             |         | Carbamidomethyl (C)[8]                     |            |               | Mascot                |                 |                   |
| 1176.6479           |                                                                | 1176.4845   | -0.1634 | -139                   | 1          | 11             | MVLLAAAVCTK        | 0           | 0       | Carbamidomethyl (C)[9]                     |            |               | Mascot                |                 |                   |
| 1176.6479           |                                                                | 1176.4845   | -0.1634 | -139                   | 1          | 11             | MVLLAAAVCTK        |             |         | Carbamidomethyl (C)[9]                     |            |               | Mascot                |                 |                   |
| 1206.6365           |                                                                | 1206.4957   | -0.1408 | -117                   | 234        | 243            | EVDNFVDKLL         |             |         |                                            |            |               | Mascot                |                 |                   |
| 1287.6467           |                                                                | 1287.6096   | -0.0371 | -29                    | 497        | 507            | FSITETFLVDK        |             |         |                                            |            |               | Mascot                |                 |                   |
| 1729.9119           |                                                                | 1729.7739   | -0.138  | -80                    | 348        | 363            | NPEKSPFNVDGYVLK    |             |         |                                            |            |               | Mascot                |                 |                   |
| 1992.9807           |                                                                | 1992.9553   | -0.0254 | -13                    | 39         | 55             | LMNTGKQHTFVETESVR  |             |         | Oxidation (M)[2]                           |            |               | Mascot                |                 |                   |
| 1992.9807           |                                                                | 1992.9553   | -0.0254 | -13                    | 39         | 55             | LMNTGKQHTFVETESVR  |             |         | Oxidation (M)[2]                           |            |               | Mascot                |                 |                   |
| 2121.0466           |                                                                | 2121.0439   | -0.0027 | -1                     | 264        | 281            | VHAPPNMESVHMKIEEK  |             |         | Oxidation (M)[8,13]                        |            |               | Mascot                |                 |                   |
| 2121.0466           |                                                                | 2121.0439   | -0.0027 | -1                     | 264        | 281            | VHAPPNMESVHMKIEEK  |             |         | Oxidation (M)[8,13]                        |            |               | Mascot                |                 |                   |

| 7                   | Coatomer subunit delta OS=Mus musculus GN=Arcn'<br>PE=2 SV=1 | COPD_MOUSE | 57181.2 | 5.89       | 9        | 42                 | 0         |         |                        |      |             |
|---------------------|--------------------------------------------------------------|------------|---------|------------|----------|--------------------|-----------|---------|------------------------|------|-------------|
| Peptide Information |                                                              |            |         |            |          |                    |           |         |                        |      |             |
| Calc. Mass          | Obsrv. Mass                                                  | ± da       | ± ppm   | Start Seq. | End Seq. | Sequence           | Ion Score | C. I. % | Modification           | Rank | Result Type |
| Calc. Mass          | Obsrv. Mass                                                  | ± da       | ± ppm   | Start Seq. | End Seq. | Sequence           | Ion Score | C. I. % | Modification           | Rank | Result Type |
| 879.4392            | 879.4913                                                     | 0.0521     | 59      | 89         | 95       | VIPEYCR            |           |         |                        |      | Mascot      |
| 988.517             | 988.5411                                                     | 0.0241     | 24      | 146        | 153      | AVRETQER           |           |         |                        |      | Mascot      |
| 1045.6074           | 1045.5051                                                    | -0.1023    | -98     | 2          | 11       | VLLAAAVCTK         |           |         | Carbamidomethyl (C)[8] |      | Mascot      |
| 1176.6479           | 1176.4845                                                    | -0.1634    | -139    | 1          | 11       | MVLLAAAVCTK        | 0         | 0       | Carbamidomethyl (C)[9] |      | Mascot      |
| 1176.6479           | 1176.4845                                                    | -0.1634    | -139    | 1          | 11       | MVLLAAAVCTK        |           |         | Carbamidomethyl (C)[9] |      | Mascot      |
| 1206.6365           | 1206.4957                                                    | -0.1408    | -117    | 234        | 243      | EVDNFVDKLK         |           |         |                        |      | Mascot      |
| 1287.6467           | 1287.6096                                                    | -0.0371    | -29     | 497        | 507      | FSSTETFLVDK        |           |         |                        |      | Mascot      |
| 1729.9119           | 1729.7739                                                    | -0.138     | -80     | 348        | 363      | NPEKSPFNDSVDGVLK   |           |         |                        |      | Mascot      |
| 1992.9807           | 1992.9553                                                    | -0.0254    | -13     | 39         | 55       | LMNTGKQHTFVETESVR  |           |         | Oxidation (M)[2]       |      | Mascot      |
| 1992.9807           | 1992.9553                                                    | -0.0254    | -13     | 39         | 55       | LMNTGKQHTFVETESVR  |           |         | Oxidation (M)[2]       |      | Mascot      |
| 2121.0466           | 2121.0439                                                    | -0.0027    | -1      | 264        | 281      | VHAPPINMESVHMKIEEK |           |         | Oxidation (M)[8,13]    |      | Mascot      |
| 2121.0466           | 2121.0439                                                    | -0.0027    | -1      | 264        | 281      | VHAPPINMESVHMKIEEK |           |         | Oxidation (M)[8,13]    |      | Mascot      |
| 8                   | Coatomer subunit delta OS=Pongo abelii GN=ARCN<br>PE=2 SV=1  | COPD_PONAB | 57160.1 | 5.89       | 9        | 42                 | 0         |         |                        |      |             |
| Peptide Information |                                                              |            |         |            |          |                    |           |         |                        |      |             |
| Calc. Mass          | Obsrv. Mass                                                  | ± da       | ± ppm   | Start Seq. | End Seq. | Sequence           | Ion Score | C. I. % | Modification           | Rank | Result Type |
| 879.4392            | 879.4913                                                     | 0.0521     | 59      | 89         | 95       | VIPEYCR            |           |         |                        |      | Mascot      |
| 988.517             | 988.5411                                                     | 0.0241     | 24      | 146        | 153      | AVRETQER           |           |         |                        |      | Mascot      |
| 1045.6074           | 1045.5051                                                    | -0.1023    | -98     | 2          | 11       | VLLAAAVCTK         |           |         | Carbamidomethyl (C)[8] |      | Mascot      |
| 1176.6479           | 1176.4845                                                    | -0.1634    | -139    | 1          | 11       | MVLLAAAVCTK        | 0         | 0       | Carbamidomethyl (C)[9] |      | Mascot      |
| 1176.6479           | 1176.4845                                                    | -0.1634    | -139    | 1          | 11       | MVLLAAAVCTK        |           |         | Carbamidomethyl (C)[9] |      | Mascot      |
| 1206.6365           | 1206.4957                                                    | -0.1408    | -117    | 234        | 243      | EVDNFVDKLK         |           |         |                        |      | Mascot      |
| 1287.6467           | 1287.6096                                                    | -0.0371    | -29     | 497        | 507      | FSSTETFLVDK        |           |         |                        |      | Mascot      |
| 1729.9119           | 1729.7739                                                    | -0.138     | -80     | 348        | 363      | NPEKSPFNDSVDGVLK   |           |         |                        |      | Mascot      |
| 1992.9807           | 1992.9553                                                    | -0.0254    | -13     | 39         | 55       | LMNTGKQHTFVETESVR  |           |         | Oxidation (M)[2]       |      | Mascot      |
| 1992.9807           | 1992.9553                                                    | -0.0254    | -13     | 39         | 55       | LMNTGKQHTFVETESVR  |           |         | Oxidation (M)[2]       |      | Mascot      |
| 2121.0291           | 2121.0439                                                    | 0.0148     | 7       | 264        | 281      | MHAPPINMESVHMKIEEK |           |         |                        |      | Mascot      |
| 2121.0291           | 2121.0439                                                    | 0.0148     | 7       | 264        | 281      | MHAPPINMESVHMKIEEK |           |         |                        |      | Mascot      |

| 9                   | Protein FAM136A OS=Homo sapiens GN=FAM136A<br>PE=1 SV=1 | F136A_HUMAN | 15630.7 | 7.56       | 7        | 40                 | 0         |         |                                             |      |             |
|---------------------|---------------------------------------------------------|-------------|---------|------------|----------|--------------------|-----------|---------|---------------------------------------------|------|-------------|
| Peptide Information |                                                         |             |         |            |          |                    |           |         |                                             |      |             |
| Calc. Mass          | Obsrv. Mass                                             | ± da        | ± ppm   | Start Seq. | End Seq. | Sequence           | Ion Score | C. I. % | Modification                                | Rank | Result Type |
| 882.4324            | 882.538                                                 | 0.1056      | 120     | 28         | 34       | MQGLMFR            |           |         |                                             |      | Mascot      |
|                     | 882.538                                                 |             |         |            |          |                    |           |         |                                             |      | Mascot      |
| 882.4324            | 882.538                                                 | 0.1056      | 120     | 28         | 34       | MQGLMFR            |           |         |                                             |      | Mascot      |
| 988.5244            | 988.5411                                                | 0.0167      | 17      | 1          | 8        | MAELQQLR           |           |         |                                             |      | Mascot      |
| 1042.5172           | 1042.4625                                               | -0.0547     | -52     | 27         | 34       | KMQGLMFR           |           |         |                                             |      | Mascot      |
| 1223.4966           | 1223.5765                                               | 0.0799      | 65      | 82         | 91       | CTMHNDKAK          |           |         | Oxidation (M)[2,6]                          |      | Mascot      |
| 1223.4966           | 1223.5765                                               | 0.0799      | 65      | 82         | 91       | CTMHNDKAK          |           |         | Carbamidomethyl (C)[1], Oxidation (M)[3]    |      | Mascot      |
| 1620.8262           | 1620.7875                                               | -0.0387     | -24     | 9          | 22       | VQGEAVSMVKSLEK     |           |         | Carbamidomethyl (C)[1], Oxidation (M)[3]    |      | Mascot      |
|                     |                                                         |             |         |            |          |                    |           |         | Oxidation (M)[8]                            |      | Mascot      |
| 1729.7706           | 1729.7739                                               | 0.0033      | 2       | 114        | 127      | CVDDHMLIPTMTK      |           |         | Carbamidomethyl (C)[1], Oxidation (M)[6,12] |      | Mascot      |
| 2121.0679           | 2121.0439                                               | -0.024      | -11     | 1          | 18       | MAELQQLRVQGEAVESMV |           |         | Oxidation (M)[1,16]                         |      | Mascot      |
|                     |                                                         |             |         |            |          |                    |           |         | K                                           |      |             |
| 2121.0679           | 2121.0439                                               | -0.024      | -11     | 1          | 18       | MAELQQLRVQGEAVESMV |           |         | Oxidation (M)[1,16]                         |      | Mascot      |
|                     |                                                         |             |         |            |          |                    |           |         | K                                           |      |             |

| 10                  | Armadio repeat-containing X-linked protein 1<br>OS=Rattus norvegicus GN=Armcx1 PE=2 SV=1 | ARMX1_RAT | 51016.5 | 9.32       | 7        | 40                      | 0         |         |                        |      |             |
|---------------------|------------------------------------------------------------------------------------------|-----------|---------|------------|----------|-------------------------|-----------|---------|------------------------|------|-------------|
| Peptide Information |                                                                                          |           |         |            |          |                         |           |         |                        |      |             |
| Calc. Mass          | Obsrv. Mass                                                                              | ± da      | ± ppm   | Start Seq. | End Seq. | Sequence                | Ion Score | C. I. % | Modification           | Rank | Result Type |
| 988.5502            | 988.5411                                                                                 | -0.0091   | -9      | 423        | 430      | SSLFFLFK                |           |         |                        |      | Mascot      |
| 996.6087            | 996.5311                                                                                 | -0.0776   | -78     | 253        | 262      | ELGGVPIAK               |           |         |                        |      | Mascot      |
| 1176.6041           | 1176.4845                                                                                | -0.1196   | -102    | 308        | 318      | LDSAVQAGLR              | 8         | 0       | Oxidation (M)[7]       |      | Mascot      |
| 1176.6041           | 1176.4845                                                                                | -0.1196   | -102    | 308        | 318      | LDSAVQAGLR              |           |         | Oxidation (M)[7]       |      | Mascot      |
| 1188.6041           | 1188.488                                                                                 | -0.1161   | -98     | 145        | 156      | TLTSSLPCPGGR            |           |         |                        |      | Mascot      |
| 1535.7886           | 1535.7461                                                                                | -0.0425   | -28     | 358        | 370      | LINFTEPNAMTR            |           |         | Oxidation (M)[11]      |      | Mascot      |
| 2120.9382           | 2121.0439                                                                                | 0.1057    | 50      | 6          | 26       | EAGCVAGMVGAGACY<br>CVVR |           |         | Carbamidomethyl (C)[4] |      | Mascot      |
| 2121.1196           | 2121.0439                                                                                | -0.0757   | -36     | 353        | 370      | IQTMKLINFTEPNAMTR       |           |         |                        |      | Mascot      |

|                |              |                        |                |                |                    |               |               |                        |                   |
|----------------|--------------|------------------------|----------------|----------------|--------------------|---------------|---------------|------------------------|-------------------|
| Gel Idx/Pos    | 22/A16       | Instr/Gel Origin       | AB4700/110211A | Process Status | Analysis Succeeded |               |               |                        |                   |
| Plate [#] Name | [1] 8907     | Instrument Sample Name |                | Spectra        | 8                  |               |               |                        |                   |
| Rank           | Protein Name | Species                | Accession No.  | Protein MW     | Protein PI Count   | Protein Score | Protein Score | Protein xtal Ion Score | Total Ion C. I. % |

|                     |                         |            |         |            |          |                        |                              |         |                         |     |        |             |     |
|---------------------|-------------------------|------------|---------|------------|----------|------------------------|------------------------------|---------|-------------------------|-----|--------|-------------|-----|
| 1                   | Annexin A2 [Bos taurus] | g173586982 |         |            |          |                        | 38515.7                      | 7.55    | 18                      | 809 | 100    | 596         | 100 |
| Peptide Information |                         |            |         |            |          |                        |                              |         |                         |     |        |             |     |
| Calc. Mass          | Obsrv. Mass             | ± da       | ± ppm   | Start Seq. | End Seq. | Sequence               | Ion Score                    | C. I. % | Modification            |     | Rank   | Result Type |     |
| 1035.5292           | 1035.4946               | -0.0346    | -33     | 213        | 220      | WISIMTER               |                              |         |                         |     |        | Mascot      |     |
| 1035.5292           | 1035.4946               | -0.0346    | -33     | 213        | 220      | WISIMTER               | 43                           | 65.971  |                         |     |        | Mascot      |     |
| 1051.5242           | 1051.4797               | -0.0445    | -42     | 213        | 220      | WISIMTER               |                              |         | Oxidation (M)[5]        |     |        | Mascot      |     |
| 1086.4851           | 1086.4495               | -0.0356    | -33     | 29         | 37       | AYTNFDAQER             |                              |         |                         |     |        | Mascot      |     |
| 1111.5531           | 1111.5143               | -0.0388    | -35     | 69         | 77       | QDIAFAYQR              | 80                           | 99.993  |                         |     |        | Mascot      |     |
| 1111.5531           | 1111.5143               | -0.0388    | -35     | 69         | 77       | QDIAFAYQR              |                              |         |                         |     |        | Mascot      |     |
| 1222.595            | 1222.5431               | -0.0519    | -42     | 105        | 115      | TPAQVDASELK            |                              |         |                         |     |        | Mascot      |     |
| 1244.6229           | 1244.5826               | -0.0403    | -32     | 136        | 145      | TNQEIQEINR             | 80                           | 99.993  |                         |     |        | Mascot      |     |
| 1244.6229           | 1244.5826               | -0.0403    | -32     | 136        | 145      | TNQEIQEINR             |                              |         |                         |     |        | Mascot      |     |
| 1421.6947           | 1421.6393               | -0.0554    | -39     | 314        | 324      | SLYYIQQDTK             |                              |         |                         |     |        | Mascot      |     |
| 1542.8486           | 1542.8008               | -0.0478    | -31     | 50         | 63       | GVDEVTVNLTNR           | 129                          | 100     |                         |     |        | Mascot      |     |
| 1542.8486           | 1542.8008               | -0.0478    | -31     | 50         | 63       | GVDEVTVNLTNR           |                              |         |                         |     |        | Mascot      |     |
| 1650.9789           | 1650.9291               | -0.0498    | -30     | 89         | 104      | SALSGHLETIVLGLLK       |                              |         |                         |     |        | Mascot      |     |
| 1725.8303           | 1725.7793               | -0.051     | -30     | 64         | 77       | SNEQRQDIAFAYQR         |                              |         |                         |     |        | Mascot      |     |
| 1725.8303           | 1725.7793               | -0.051     | -30     | 64         | 77       | SNEQRQDIAFAYQR         | 71                           | 99.948  |                         |     |        | Mascot      |     |
| 1771.9912           | 1771.9419               | -0.0493    | -28     | 48         | 63       | TKGDEVTVNLTNR          |                              |         |                         |     |        | Mascot      |     |
| 1777.8636           | 1777.8119               | -0.0517    | -29     | 120        | 135      | GLGTDEDSLIEICSR        |                              |         | Carbamidomethyl (C)[14] |     |        | Mascot      |     |
| 1777.8636           | 1777.8119               | -0.0517    | -29     | 120        | 135      | GLGTDEDSLIEICSR        | 95                           | 100     | Carbamidomethyl (C)[14] |     |        | Mascot      |     |
| 1797.8501           | 1797.8                  | -0.0501    | -28     | 153        | 168      | TDLEKDIVSDTSGDFR       |                              |         |                         |     |        | Mascot      |     |
| 1844.9025           | 1844.8434               | -0.0591    | -32     | 11         | 28       | LSLEGDHSPTPSAYGSV<br>K |                              |         |                         |     |        | Mascot      |     |
| 1908.8821           | 1908.8281               | -0.054     | -28     | 180        | 196      | AEDGSVIDYELIDQDAR      |                              |         |                         |     |        | Mascot      |     |
| 2012.96             | 2012.8989               | -0.0611    | -30     | 314        | 329      | SLYYIQQDTKGDYQK        |                              |         |                         |     |        | Mascot      |     |
| 2064.9832           | 2064.9236               | -0.0596    | -29     | 179        | 196      | RAEDGSVIDYELIDQDAR     |                              |         |                         |     |        | Mascot      |     |
| 2155.0667           | 2155.0056               | -0.0611    | -28     | 29         | 47       | AYTNFDAQERDALNIETAK    | 99                           | 100     |                         |     |        | Mascot      |     |
| 2155.0667           | 2155.0056               | -0.0611    | -28     | 29         | 47       | AYTNFDAQERDALNIETAK    |                              |         |                         |     |        | Mascot      |     |
| 2770.3054           | 2770.2288               | #          | -0.0766 | -28        | 180      | 204                    | AEDGSVIDYELIDQDAR<br>LYDAGVK |         |                         |     | Mascot | Mascot      |     |

| 2                   | RecName: Full=Annexin A2; AltName: Full=Annexin-2 | g1122144928 | 38596.6 | 6.49       | 18       | 805              | 100       | 593     | 100              |      |             |
|---------------------|---------------------------------------------------|-------------|---------|------------|----------|------------------|-----------|---------|------------------|------|-------------|
| Peptide Information |                                                   |             |         |            |          |                  |           |         |                  |      |             |
| Calc. Mass          | Obsrv. Mass                                       | ± da        | ± ppm   | Start Seq. | End Seq. | Sequence         | Ion Score | C. I. % | Modification     | Rank | Result Type |
| 1035.5292           | 1035.4946                                         | -0.0346     | -33     | 213        | 220      | WISIMTER         |           |         |                  |      | Mascot      |
| 1035.5292           | 1035.4946                                         | -0.0346     | -33     | 213        | 220      | WISIMTER         | 43        | 65.971  |                  |      | Mascot      |
| 1051.5242           | 1051.4797                                         | -0.0445     | -42     | 213        | 220      | WISIMTER         |           |         | Oxidation (M)[5] |      | Mascot      |
| 1086.4851           | 1086.4495                                         | -0.0356     | -33     | 29         | 37       | AYTNFDAQER       |           |         |                  |      | Mascot      |
| 1111.5531           | 1111.5143                                         | -0.0388     | -35     | 69         | 77       | QDIAFAYQR        | 80        | 99.993  |                  |      | Mascot      |
| 1111.5531           | 1111.5143                                         | -0.0388     | -35     | 69         | 77       | QDIAFAYQR        |           |         |                  |      | Mascot      |
| 1222.595            | 1222.5431                                         | -0.0519     | -42     | 105        | 115      | TPAQVDASELK      |           |         |                  |      | Mascot      |
| 1244.6229           | 1244.5826                                         | -0.0403     | -32     | 136        | 145      | TNQEIQEINR       | 80        | 99.993  |                  |      | Mascot      |
| 1244.6229           | 1244.5826                                         | -0.0403     | -32     | 136        | 145      | TNQEIQEINR       |           |         |                  |      | Mascot      |
| 1421.6947           | 1421.6393                                         | -0.0554     | -39     | 314        | 324      | SLYYIQQDTK       |           |         |                  |      | Mascot      |
| 1542.8486           | 1542.8008                                         | -0.0478     | -31     | 50         | 63       | GVDEVTVNLTNR     | 129       | 100     |                  |      | Mascot      |
| 1542.8486           | 1542.8008                                         | -0.0478     | -31     | 50         | 63       | GVDEVTVNLTNR     |           |         |                  |      | Mascot      |
| 1650.9789           | 1650.9291                                         | -0.0498     | -30     | 89         | 104      | SALSGHLETIVLGLLK |           |         |                  |      | Mascot      |

|           |                                                                                                   |             |         |       |            |                     |                     |           |                         |                         |                         |             |
|-----------|---------------------------------------------------------------------------------------------------|-------------|---------|-------|------------|---------------------|---------------------|-----------|-------------------------|-------------------------|-------------------------|-------------|
|           | 1725.8303                                                                                         | 1725.7793   | -0.051  | -30   | 64         | 77                  | SNEORQDIAFYAYR      |           | 71                      | 99.948                  |                         | Mascot      |
|           | 1725.8303                                                                                         | 1725.7793   | -0.051  | -30   | 64         | 77                  | SNEORQDIAFYAYR      |           |                         |                         |                         | Mascot      |
|           | 1771.9912                                                                                         | 1771.9419   | -0.0493 | -28   | 48         | 63                  | TKGVDEVTVNLTNR      |           |                         |                         |                         | Mascot      |
|           | 1777.8636                                                                                         | 1777.8119   | -0.0517 | -29   | 120        | 135                 | GLGTDEDSLIEICSR     |           |                         |                         | Carbamidomethyl (C)[14] | Mascot      |
|           | 1777.8636                                                                                         | 1777.8119   | -0.0517 | -29   | 120        | 135                 | GLGTDEDSLIEICSR     |           | 95                      | 100                     | Carbamidomethyl (C)[14] | Mascot      |
|           | 1797.8501                                                                                         | 1797.7      | -0.0501 | -28   | 153        | 168                 | TDLEKDIVSDTSGDFR    |           |                         |                         |                         | Mascot      |
|           | 1844.9025                                                                                         | 1844.8434   | -0.0591 | -32   | 11         | 28                  | LSLEGDHSTPPSAYGSV   |           |                         |                         |                         | Mascot      |
|           |                                                                                                   |             |         |       |            |                     | K                   |           |                         |                         |                         |             |
|           | 1908.8821                                                                                         | 1908.8281   | -0.054  | -28   | 180        | 196                 | AEDGSVIDYELIDQDAR   |           |                         |                         |                         | Mascot      |
|           | 2012.96                                                                                           | 2012.8989   | -0.0611 | -30   | 314        | 329                 | SLYYYIQGDTKGDYQK    |           |                         |                         |                         | Mascot      |
|           | 2064.9832                                                                                         | 2064.9236   | -0.0596 | -29   | 179        | 196                 | RAEDGSVIDYELIDQDAR  |           |                         |                         |                         | Mascot      |
|           | 2155.0667                                                                                         | 2155.0056   | -0.0611 | -28   | 29         | 47                  | AYTNFDAERDALNIETAIK |           | 99                      | 100                     |                         | Mascot      |
|           | 2155.0667                                                                                         | 2155.0056   | -0.0611 | -28   | 29         | 47                  | AYTNFDAERDALNIETAIK |           |                         |                         |                         | Mascot      |
|           | 2770.3054                                                                                         | 2770.2288   | -0.0766 | -28   | 180        | 204                 | AEDGSVIDYELIDQDARD  |           |                         |                         |                         | Mascot      |
|           |                                                                                                   |             |         |       |            |                     | LYDAGVK             |           |                         |                         |                         |             |
|           | Chain A, Annexin A2: Does It Induce Membrane Aggregation By A New Multimeric State Of The Protein |             |         |       |            |                     |                     |           |                         |                         |                         |             |
|           | Peptide Information                                                                               |             |         |       |            |                     |                     |           |                         |                         |                         |             |
|           | Calc. Mass                                                                                        | Obsrv. Mass | ± da    | ± ppm | Start Seq. | End Seq.            | Sequence            | Ion Score | C. I. %                 | Modification            | Rank                    | Result Type |
|           | 1035.5292                                                                                         | 1035.4946   | -0.0346 | -33   | 213        | 220                 | WISIMTER            |           |                         |                         |                         | Mascot      |
|           | 1035.5292                                                                                         | 1035.4946   | -0.0346 | -33   | 213        | 220                 | WISIMTER            | 43        | 65.971                  |                         |                         | Mascot      |
| 1051.5242 | 1051.4797                                                                                         | -0.0445     | -42     | 213   | 220        | WISIMTER            |                     |           | Oxidation (M)[5]        |                         | Mascot                  |             |
| 1086.4851 | 1086.4495                                                                                         | -0.0356     | -33     | 29    | 37         | AYTNFDAER           |                     |           |                         |                         | Mascot                  |             |
| 1111.5531 | 1111.5143                                                                                         | -0.0388     | -35     | 69    | 77         | QDIAFYAYR           |                     | 99.993    |                         |                         | Mascot                  |             |
| 1111.5531 | 1111.5143                                                                                         | -0.0388     | -35     | 69    | 77         | QDIAFYAYR           |                     |           |                         |                         | Mascot                  |             |
| 1222.595  | 1222.5431                                                                                         | -0.0519     | -42     | 105   | 115        | TPAQYDASELK         |                     |           |                         |                         | Mascot                  |             |
| 1244.6229 | 1244.5826                                                                                         | -0.0403     | -32     | 136   | 145        | TNQEQLQINR          |                     | 99.993    |                         |                         | Mascot                  |             |
| 1244.6229 | 1244.5826                                                                                         | -0.0403     | -32     | 136   | 145        | TNQEQLQINR          |                     |           |                         |                         | Mascot                  |             |
| 1421.6947 | 1421.6393                                                                                         | -0.0554     | -39     | 314   | 324        | SLYYYIQGDTK         |                     |           |                         |                         | Mascot                  |             |
| 1542.8486 | 1542.8008                                                                                         | -0.0478     | -31     | 50    | 63         | GVDEVTVNLTNR        |                     | 129       | 100                     |                         | Mascot                  |             |
| 1542.8486 | 1542.8008                                                                                         | -0.0478     | -31     | 50    | 63         | GVDEVTVNLTNR        |                     |           |                         |                         | Mascot                  |             |
| 1650.9789 | 1650.9291                                                                                         | -0.0498     | -30     | 89    | 104        | SALSGHLETYVLGLLK    |                     |           |                         |                         | Mascot                  |             |
| 1725.8303 | 1725.7793                                                                                         | -0.051      | -30     | 64    | 77         | SNEORQDIAFYAYR      |                     |           |                         |                         | Mascot                  |             |
| 1725.8303 | 1725.7793                                                                                         | -0.051      | -30     | 64    | 77         | SNEORQDIAFYAYR      |                     | 71        | 99.948                  |                         | Mascot                  |             |
| 1771.9912 | 1771.9419                                                                                         | -0.0493     | -28     | 48    | 63         | TKGVDEVTVNLTNR      |                     |           |                         |                         | Mascot                  |             |
| 1777.8636 | 1777.8119                                                                                         | -0.0517     | -29     | 120   | 135        | GLGTDEDSLIEICSR     |                     |           | Carbamidomethyl (C)[14] |                         | Mascot                  |             |
| 1777.8636 | 1777.8119                                                                                         | -0.0517     | -29     | 120   | 135        | GLGTDEDSLIEICSR     |                     | 95        | 100                     | Carbamidomethyl (C)[14] | Mascot                  |             |
| 1844.9025 | 1844.8434                                                                                         | -0.0591     | -32     | 11    | 28         | LSLEGDHSTPPSAYGSV   |                     |           |                         |                         | Mascot                  |             |
|           |                                                                                                   |             |         |       |            | K                   |                     |           |                         |                         |                         |             |
| 1908.8821 | 1908.8281                                                                                         | -0.054      | -28     | 180   | 196        | AEDGSVIDYELIDQDAR   |                     |           |                         |                         | Mascot                  |             |
| 2012.96   | 2012.8989                                                                                         | -0.0611     | -30     | 314   | 329        | SLYYYIQGDTKGDYQK    |                     |           |                         |                         | Mascot                  |             |
| 2064.9832 | 2064.9236                                                                                         | -0.0596     | -29     | 179   | 196        | RAEDGSVIDYELIDQDAR  |                     |           |                         |                         | Mascot                  |             |
| 2155.0667 | 2155.0056                                                                                         | -0.0611     | -28     | 29    | 47         | AYTNFDAERDALNIETAIK |                     | 99        | 100                     |                         | Mascot                  |             |
| 2155.0667 | 2155.00                                                                                           |             |         |       |            |                     |                     |           |                         |                         |                         |             |

|           |           |         |     |     |     |                               |     |        |                         |        |
|-----------|-----------|---------|-----|-----|-----|-------------------------------|-----|--------|-------------------------|--------|
| 1542.8486 | 1542.8008 | -0.0478 | -31 | 34  | 47  | GVDEVTVNLTNR                  | 129 | 100    |                         | Mascot |
| 1542.8486 | 1542.8008 | -0.0478 | -31 | 34  | 47  | GVDEVTVNLTNR                  |     |        |                         | Mascot |
| 1650.9789 | 1650.9291 | -0.0498 | -30 | 73  | 88  | SALSGHLETVILGLLK              |     |        |                         | Mascot |
| 1725.8303 | 1725.7793 | -0.051  | -30 | 48  | 61  | SNEQRQDIAFAYOR                | 71  | 99.948 |                         | Mascot |
| 1725.8303 | 1725.7793 | -0.051  | -30 | 48  | 61  | SNEQRQDIAFAYOR                |     |        |                         | Mascot |
| 1771.9912 | 1771.9419 | -0.0493 | -28 | 32  | 47  | TKGVDEVTVNLTNR                |     |        |                         | Mascot |
| 1777.8636 | 1777.8119 | -0.0517 | -29 | 104 | 119 | GLGTDEDSLIEICSR               |     |        | Carbamidomethyl (C)[14] | Mascot |
| 1777.8636 | 1777.8119 | -0.0517 | -29 | 104 | 119 | GLGTDEDSLIEICSR               | 95  | 100    | Carbamidomethyl (C)[14] | Mascot |
| 1908.8821 | 1908.8281 | -0.054  | -28 | 164 | 180 | AEDGSVIDYELIDQDAR             |     |        |                         | Mascot |
| 2064.9832 | 2064.9236 | -0.0596 | -29 | 163 | 180 | RAEDGSVIDYELIDQDAR            |     |        |                         | Mascot |
| 2155.0667 | 2155.0056 | -0.0611 | -28 | 13  | 31  | AYTNFDAERDALNIETAIK           | 99  | 100    |                         | Mascot |
| 2155.0667 | 2155.0056 | -0.0611 | -28 | 13  | 31  | AYTNFDAERDALNIETAIK           |     |        |                         | Mascot |
| 2770.3054 | 2770.2288 | -0.0766 | -28 | 164 | 188 | AEDGSVIDYELIDQDARD<br>LYDAGVK |     |        |                         | Mascot |

7 annexin A2 [Sus scrofa] gi|54020966 38509.6 6.49 14 742 100 594 100

| Peptide Information |             |         |       |            |          |                               |           |         |                         | Rank |  | Result Type |
|---------------------|-------------|---------|-------|------------|----------|-------------------------------|-----------|---------|-------------------------|------|--|-------------|
| Calc. Mass          | Obsrv. Mass | ± da    | ± ppm | Start Seq. | End Seq. | Sequence                      | Ion Score | C. I. % | Modification            |      |  |             |
| 1035.5292           | 1035.4946   | -0.0346 | -33   | 213        | 220      | WISIMTER                      |           |         |                         |      |  | Mascot      |
| 1035.5292           | 1035.4946   | -0.0346 | -33   | 213        | 220      | WISIMTER                      |           |         |                         |      |  | Mascot      |
| 1051.5242           | 1051.4797   | -0.0445 | -42   | 213        | 220      | WISIMTER                      | 43        | 65.971  | Oxidation (M)[5]        |      |  | Mascot      |
| 1086.4851           | 1086.4495   | -0.0356 | -33   | 29         | 37       | AYTNFDAER                     |           |         |                         |      |  | Mascot      |
| 1111.5531           | 1111.5143   | -0.0388 | -35   | 69         | 77       | QDIAFAYOR                     | 80        | 99.993  |                         |      |  | Mascot      |
| 1111.5531           | 1111.5143   | -0.0388 | -35   | 69         | 77       | QDIAFAYOR                     |           |         |                         |      |  | Mascot      |
| 1222.595            | 1222.5431   | -0.0519 | -42   | 105        | 115      | TPAQDASELK                    |           |         |                         |      |  | Mascot      |
| 1244.6229           | 1244.5826   | -0.0403 | -32   | 136        | 145      | TNQELOEINR                    | 80        | 99.993  |                         |      |  | Mascot      |
| 1244.6229           | 1244.5826   | -0.0403 | -32   | 136        | 145      | TNQELOEINR                    |           |         |                         |      |  | Mascot      |
| 1542.8486           | 1542.8008   | -0.0478 | -31   | 50         | 63       | GVDEVTVNLTNR                  | 129       | 100     |                         |      |  | Mascot      |
| 1542.8486           | 1542.8008   | -0.0478 | -31   | 50         | 63       | GVDEVTVNLTNR                  |           |         |                         |      |  | Mascot      |
| 1650.9789           | 1650.9291   | -0.0498 | -30   | 89         | 104      | SALSGHLETVILGLLK              |           |         |                         |      |  | Mascot      |
| 1725.8303           | 1725.7793   | -0.051  | -30   | 64         | 77       | SNEQRQDIAFAYOR                | 71        | 99.948  |                         |      |  | Mascot      |
| 1725.8303           | 1725.7793   | -0.051  | -30   | 64         | 77       | SNEQRQDIAFAYOR                |           |         |                         |      |  | Mascot      |
| 1771.9912           | 1771.9419   | -0.0493 | -28   | 48         | 63       | TKGVDEVTVNLTNR                |           |         |                         |      |  | Mascot      |
| 1777.8636           | 1777.8119   | -0.0517 | -29   | 120        | 135      | GLGTDEDSLIEICSR               |           |         | Carbamidomethyl (C)[14] |      |  | Mascot      |
| 1777.8636           | 1777.8119   | -0.0517 | -29   | 120        | 135      | GLGTDEDSLIEICSR               | 95        | 100     | Carbamidomethyl (C)[14] |      |  | Mascot      |
| 1908.8821           | 1908.8281   | -0.054  | -28   | 180        | 196      | AEDGSVIDYELIDQDAR             |           |         |                         |      |  | Mascot      |
| 2064.9832           | 2064.9236   | -0.0596 | -29   | 179        | 196      | RAEDGSVIDYELIDQDAR            |           |         |                         |      |  | Mascot      |
| 2155.0667           | 2155.0056   | -0.0611 | -28   | 29         | 47       | AYTNFDAERDALNIETAIK           | 99        | 100     |                         |      |  | Mascot      |
| 2155.0667           | 2155.0056   | -0.0611 | -28   | 29         | 47       | AYTNFDAERDALNIETAIK           |           |         |                         |      |  | Mascot      |
| 2770.3054           | 2770.2288   | -0.0766 | -28   | 180        | 204      | AEDGSVIDYELIDQDARD<br>LYDAGVK |           |         |                         |      |  | Mascot      |

8 Annexin A2 [Homo sapiens] gi|18645167 38551.8 7.57 16 702 100 525 100

| Peptide Information |             |         |       |            |          |                               |           |         |                         | Rank |  | Result Type |
|---------------------|-------------|---------|-------|------------|----------|-------------------------------|-----------|---------|-------------------------|------|--|-------------|
| Calc. Mass          | Obsrv. Mass | ± da    | ± ppm | Start Seq. | End Seq. | Sequence                      | Ion Score | C. I. % | Modification            |      |  |             |
| 1035.5292           | 1035.4946   | -0.0346 | -33   | 213        | 220      | WISIMTER                      |           |         |                         |      |  | Mascot      |
| 1035.5292           | 1035.4946   | -0.0346 | -33   | 213        | 220      | WISIMTER                      | 43        | 65.971  | Oxidation (M)[5]        |      |  | Mascot      |
| 1051.5242           | 1051.4797   | -0.0445 | -42   | 213        | 220      | WISIMTER                      |           |         |                         |      |  | Mascot      |
| 1086.4851           | 1086.4495   | -0.0356 | -33   | 29         | 37       | AYTNFDAER                     |           |         |                         |      |  | Mascot      |
| 1111.5531           | 1111.5143   | -0.0388 | -35   | 69         | 77       | QDIAFAYOR                     | 80        | 99.993  |                         |      |  | Mascot      |
| 1111.5531           | 1111.5143   | -0.0388 | -35   | 69         | 77       | QDIAFAYOR                     |           |         |                         |      |  | Mascot      |
| 1222.595            | 1222.5431   | -0.0519 | -42   | 105        | 115      | TPAQDASELK                    |           |         |                         |      |  | Mascot      |
| 1244.6229           | 1244.5826   | -0.0403 | -32   | 136        | 145      | TNQELOEINR                    | 80        | 99.993  |                         |      |  | Mascot      |
| 1244.6229           | 1244.5826   | -0.0403 | -32   | 136        | 145      | TNQELOEINR                    |           |         |                         |      |  | Mascot      |
| 1421.6947           | 1421.6393   | -0.0554 | -39   | 314        | 324      | SLYYIQQDTK                    |           |         |                         |      |  | Mascot      |
| 1542.8486           | 1542.8008   | -0.0478 | -31   | 50         | 63       | GVDEVTVNLTNR                  | 129       | 100     |                         |      |  | Mascot      |
| 1542.8486           | 1542.8008   | -0.0478 | -31   | 50         | 63       | GVDEVTVNLTNR                  |           |         |                         |      |  | Mascot      |
| 1650.9789           | 1650.9291   | -0.0498 | -30   | 89         | 104      | SALSGHLETVILGLLK              |           |         |                         |      |  | Mascot      |
| 1771.9912           | 1771.9419   | -0.0493 | -28   | 48         | 63       | TKGVDEVTVNLTNR                |           |         |                         |      |  | Mascot      |
| 1777.8636           | 1777.8119   | -0.0517 | -29   | 120        | 135      | GLGTDEDSLIEICSR               |           |         | Carbamidomethyl (C)[14] |      |  | Mascot      |
| 1777.8636           | 1777.8119   | -0.0517 | -29   | 120        | 135      | GLGTDEDSLIEICSR               | 95        | 100     | Carbamidomethyl (C)[14] |      |  | Mascot      |
| 1844.9025           | 1844.8434   | -0.0591 | -32   | 11         | 28       | LSLEGDHSTPPSAYGSV<br>K        |           |         |                         |      |  | Mascot      |
| 1908.8821           | 1908.8281   | -0.054  | -28   | 180        | 196      | AEDGSVIDYELIDQDAR             |           |         |                         |      |  | Mascot      |
| 2012.96             | 2012.8989   | -0.0611 | -30   | 314        | 329      | SLYYIQQDTKGDYQK               |           |         |                         |      |  | Mascot      |
| 2064.9832           | 2064.9236   | -0.0596 | -29   | 179        | 196      | RAEDGSVIDYELIDQDAR            |           |         |                         |      |  | Mascot      |
| 2155.0667           | 2155.0056   | -0.0611 | -28   | 29         | 47       | AYTNFDAERDALNIETAIK           | 99        | 100     |                         |      |  | Mascot      |
| 2155.0667           | 2155.0056   | -0.0611 | -28   | 29         | 47       | AYTNFDAERDALNIETAIK           |           |         |                         |      |  | Mascot      |
| 2770.3054           | 2770.2288   | -0.0766 | -28   | 180        | 204      | AEDGSVIDYELIDQDARD<br>LYDAGVK |           |         |                         |      |  | Mascot      |

9 Annexin A2 [Homo sapiens] gi|73909156 40502.8 8.41 16 699 100 525 100

| Peptide Information |             |         |       |            |          |                               |           |         |                         | Rank |  | Result Type |
|---------------------|-------------|---------|-------|------------|----------|-------------------------------|-----------|---------|-------------------------|------|--|-------------|
| Calc. Mass          | Obsrv. Mass | ± da    | ± ppm | Start Seq. | End Seq. | Sequence                      | Ion Score | C. I. % | Modification            |      |  |             |
| 1035.5292           | 1035.4946   | -0.0346 | -33   | 231        | 238      | WISIMTER                      |           |         |                         |      |  | Mascot      |
| 1035.5292           | 1035.4946   | -0.0346 | -33   | 231        | 238      | WISIMTER                      | 43        | 65.971  | Oxidation (M)[5]        |      |  | Mascot      |
| 1051.5242           | 1051.4797   | -0.0445 | -42   | 231        | 238      | WISIMTER                      |           |         |                         |      |  | Mascot      |
| 1086.4851           | 1086.4495   | -0.0356 | -33   | 47         | 55       | AYTNFDAER                     | 80        | 99.993  |                         |      |  | Mascot      |
| 1111.5531           | 1111.5143   | -0.0388 | -35   | 87         | 95       | QDIAFAYOR                     |           |         |                         |      |  | Mascot      |
| 1111.5531           | 1111.5143   | -0.0388 | -35   | 87         | 95       | QDIAFAYOR                     |           |         |                         |      |  | Mascot      |
| 1222.595            | 1222.5431   | -0.0519 | -42   | 123        | 133      | TPAQDASELK                    | 80        | 99.993  |                         |      |  | Mascot      |
| 1244.6229           | 1244.5826   | -0.0403 | -32   | 154        | 163      | TNQELOEINR                    |           |         |                         |      |  | Mascot      |
| 1244.6229           | 1244.5826   | -0.0403 | -32   | 154        | 163      | TNQELOEINR                    |           |         |                         |      |  | Mascot      |
| 1421.6947           | 1421.6393   | -0.0554 | -39   | 332        | 342      | SLYYIQQDTK                    |           |         |                         |      |  | Mascot      |
| 1542.8486           | 1542.8008   | -0.0478 | -31   | 68         | 81       | GVDEVTVNLTNR                  | 129       | 100     |                         |      |  | Mascot      |
| 1542.8486           | 1542.8008   | -0.0478 | -31   | 68         | 81       | GVDEVTVNLTNR                  |           |         |                         |      |  | Mascot      |
| 1650.9789           | 1650.9291   | -0.0498 | -30   | 107        | 122      | SALSGHLETVILGLLK              |           |         |                         |      |  | Mascot      |
| 1771.9912           | 1771.9419   | -0.0493 | -28   | 66         | 81       | TKGVDEVTVNLTNR                |           |         |                         |      |  | Mascot      |
| 1777.8636           | 1777.8119   | -0.0517 | -29   | 138        | 153      | GLGTDEDSLIEICSR               |           |         | Carbamidomethyl (C)[14] |      |  | Mascot      |
| 1777.8636           | 1777.8119   | -0.0517 | -29   | 138        | 153      | GLGTDEDSLIEICSR               | 95        | 100     | Carbamidomethyl (C)[14] |      |  | Mascot      |
| 1844.9025           | 1844.8434   | -0.0591 | -32   | 29         | 46       | LSLEGDHSTPPSAYGSV<br>K        |           |         |                         |      |  | Mascot      |
| 1908.8821           | 1908.8281   | -0.054  | -28   | 198        | 214      | AEDGSVIDYELIDQDAR             |           |         |                         |      |  | Mascot      |
| 2012.96             | 2012.8989   | -0.0611 | -30   | 332        | 347      | SLYYIQQDTKGDYQK               |           |         |                         |      |  | Mascot      |
| 2064.9832           | 2064.9236   | -0.0596 | -29   | 197        | 214      | RAEDGSVIDYELIDQDAR            |           |         |                         |      |  | Mascot      |
| 2155.0667           | 2155.0056   | -0.0611 | -28   | 47         | 65       | AYTNFDAERDALNIETAIK           | 99        | 100     |                         |      |  | Mascot      |
| 2155.0667           | 2155.0056   | -0.0611 | -28   | 47         | 65       | AYTNFDAERDALNIETAIK           |           |         |                         |      |  | Mascot      |
| 2770.3054           | 2770.2288   | -0.0766 | -28   | 198        | 222      | AEDGSVIDYELIDQDARD<br>LYDAGVK |           |         |                         |      |  | Mascot      |

10 hypothetical protein [Homo sapiens] gi|34364597 40327.7 8.67 16 692 100 525 100

| Peptide Information |             |         |       |            |          |                        |           |         |                         | Rank |  | Result Type |
|---------------------|-------------|---------|-------|------------|----------|------------------------|-----------|---------|-------------------------|------|--|-------------|
| Calc. Mass          | Obsrv. Mass | ± da    | ± ppm | Start Seq. | End Seq. | Sequence               | Ion Score | C. I. % | Modification            |      |  |             |
| 1035.5292           | 1035.4946   | -0.0346 | -33   | 231        | 238      | WISIMTER               |           |         |                         |      |  | Mascot      |
| 1035.5292           | 1035.4946   | -0.0346 | -33   | 231        | 238      | WISIMTER               | 43        | 65.971  | Oxidation (M)[5]        |      |  | Mascot      |
| 1051.5242           | 1051.4797   | -0.0445 | -42   | 231        | 238      | WISIMTER               |           |         |                         |      |  | Mascot      |
| 1086.4851           | 1086.4495   | -0.0356 | -33   | 47         | 55       | AYTNFDAER              | 80        | 99.993  |                         |      |  | Mascot      |
| 1111.5531           | 1111.5143   | -0.0388 | -35   | 87         | 95       | QDIAFAYOR              |           |         |                         |      |  | Mascot      |
| 1111.5531           | 1111.5143   | -0.0388 | -35   | 87         | 95       | QDIAFAYOR              |           |         |                         |      |  | Mascot      |
| 1222.595            | 1222.5431   | -0.0519 | -42   | 123        | 133      | TPAQDASELK             | 80        | 99.993  |                         |      |  | Mascot      |
| 1244.6229           | 1244.5826   | -0.0403 | -32   | 154        | 163      | TNQELOEINR             |           |         |                         |      |  | Mascot      |
| 1244.6229           | 1244.5826   | -0.0403 | -32   | 154        | 163      | TNQELOEINR             |           |         |                         |      |  | Mascot      |
| 1421.6947           | 1421.6393   | -0.0554 | -39   | 332        | 342      | SLYYIQQDTK             |           |         |                         |      |  | Mascot      |
| 1542.8486           | 1542.8008   | -0.0478 | -31   | 68         | 81       | GVDEVTVNLTNR           | 129       | 100     |                         |      |  | Mascot      |
| 1542.8486           | 1542.8008   | -0.0478 | -31   | 68         | 81       | GVDEVTVNLTNR           |           |         |                         |      |  | Mascot      |
| 1650.9789           | 1650.9291   | -0.0498 | -30   | 107        | 122      | SALSGHLETVILGLLK       |           |         |                         |      |  | Mascot      |
| 1771.9912           | 1771.9419   | -0.0493 | -28   | 66         | 81       | TKGVDEVTVNLTNR         |           |         |                         |      |  | Mascot      |
| 1777.8636           | 1777.8119   | -0.0517 | -29   | 138        | 153      | GLGTDEDSLIEICSR        |           |         | Carbamidomethyl (C)[14] |      |  | Mascot      |
| 1777.8636           | 1777.8119   | -0.0517 | -29   | 138        | 153      | GLGTDEDSLIEICSR        | 95        | 100     | Carbamidomethyl (C)[14] |      |  | Mascot      |
| 1844.9025           | 1844.8434   | -0.0591 | -32   | 29         | 46       | LSLEGDHSTPPSAYGSV<br>K |           |         |                         |      |  | Mascot      |
| 1908.8821           | 1908.8281   | -0.054  | -28   | 198        | 214      | AEDGSVIDYELIDQDAR      |           |         |                         |      |  | Mascot      |

[illegible]

| Calc. Mass                                         | Obsrv. Mass | ± da    | ± ppm | Start Seq. | End Seq. | Sequence          | Ion Score   | C. I. % | Modification     | Rank | Result Type |     |     |     |     |
|----------------------------------------------------|-------------|---------|-------|------------|----------|-------------------|-------------|---------|------------------|------|-------------|-----|-----|-----|-----|
| 912.3805                                           | 912.3347    | -0.0458 | -50   | 274        | 283      | GGSDGYGSGR        |             |         |                  |      | Mascot      |     |     |     |     |
| 1013.4434                                          | 1013.3986   | -0.0448 | -44   | 249        | 258      | GGNFGFGDSR        |             |         |                  |      | Mascot      |     |     |     |     |
| 1013.4434                                          | 1013.3986   | -0.0448 | -44   | 249        | 258      | GGNFGFGDSR        | 47          | 92.31   |                  |      | Mascot      |     |     |     |     |
| 1165.5232                                          | 1165.6853   | 0.1621  | 139   | 166        | 174      | EDTEEHHLR         |             |         |                  |      | Mascot      |     |     |     |     |
| 1221.5529                                          | 1221.4976   | -0.0553 | -45   | 236        | 245      | QEMQEVQSSR        |             |         |                  |      | Mascot      |     |     |     |     |
| 1237.5477                                          | 1237.4938   | -0.0539 | -44   | 236        | 245      | QEMQEVQSSR        |             |         | Oxidation (M)[3] |      | Mascot      |     |     |     |     |
| 1313.598                                           | 1313.5437   | -0.0543 | -41   | 246        | 258      | SGRGGNFGFGDSR     | 34          | 0       |                  |      | Mascot      |     |     |     |     |
| 1313.598                                           | 1313.5437   | -0.0543 | -41   | 246        | 258      | SGRGGNFGFGDSR     |             |         |                  |      | Mascot      |     |     |     |     |
| 1377.6294                                          | 1377.5789   | -0.0505 | -37   | 259        | 273      | GGGNGFQPGGSNFR    |             |         |                  |      | Mascot      |     |     |     |     |
| 1377.6294                                          | 1377.5789   | -0.0505 | -37   | 259        | 273      | GGGNGFQPGGSNFR    | 94          | 100     |                  |      | Mascot      |     |     |     |     |
| 1410.6873                                          | 1410.6418   | -0.0455 | -32   | 219        | 230      | YHTINGHNAEVR      |             |         |                  |      | Mascot      |     |     |     |     |
| 1648.8071                                          | 1648.7543   | -0.0528 | -32   | 232        | 245      | ALSRQEMQEVQSSR    |             |         |                  |      | Mascot      |     |     |     |     |
| 1664.802                                           | 1664.7408   | -0.0612 | -37   | 232        | 245      | ALSRQEMQEVQSSR    |             |         | Oxidation (M)[7] |      | Mascot      |     |     |     |     |
| 1798.9221                                          | 1798.8584   | -0.0637 | -35   | 68         | 83       | LFIGGLSFETTEESLR  |             |         |                  |      | Mascot      |     |     |     |     |
| 1927.0171                                          | 1926.9421   | -0.075  | -39   | 67         | 83       | KLFIGGLSFETTEESLR |             |         |                  |      | Mascot      |     |     |     |     |
| 2189.9053                                          | 2189.8191   | -0.0862 | -39   | 371        | 395      | NMGGPYGGGNYGPGGS  |             |         |                  |      | Mascot      |     |     |     |     |
|                                                    |             |         |       |            |          | GGSGGYGGR         |             |         |                  |      |             |     |     |     |     |
| 2205.9001                                          | 2205.8152   | -0.0849 | -38   | 371        | 395      | NMGGPYGGGNYGPGGS  |             |         | Oxidation (M)[2] |      | Mascot      |     |     |     |     |
|                                                    |             |         |       |            |          | GGSGGYGGR         |             |         |                  |      |             |     |     |     |     |
| 2205.9001                                          | 2205.8152   | -0.0849 | -38   | 371        | 395      | NMGGPYGGGNYGPGGS  | 81          | 99.997  | Oxidation (M)[2] |      | Mascot      |     |     |     |     |
|                                                    |             |         |       |            |          | GGSGGYGGR         |             |         |                  |      |             |     |     |     |     |
| 2220.0706                                          | 2219.9822   | -0.0884 | -40   | 175        | 192      | DYFEYQKIDTIEITDR  |             |         |                  |      | Mascot      |     |     |     |     |
| 2270.9919                                          | 2270.9021   | -0.0898 | -40   | 259        | 283      | GGGNGFQPGGSNFRG   |             |         |                  |      | Mascot      |     |     |     |     |
|                                                    |             |         |       |            |          | GSDGYGSGR         |             |         |                  |      |             |     |     |     |     |
| 2270.9919                                          | 2270.9021   | -0.0898 | -40   | 259        | 283      | GGGNGFQPGGSNFRG   | 2           | 0       |                  |      | Mascot      |     |     |     |     |
|                                                    |             |         |       |            |          | GSDGYGSGR         |             |         |                  |      |             |     |     |     |     |
| 2277.155                                           | 2277.0657   | -0.0893 | -39   | 199        | 218      | GFGVTFDDHPVDKIVL  |             |         |                  |      | Mascot      |     |     |     |     |
|                                                    |             |         |       |            |          | QK                |             |         |                  |      |             |     |     |     |     |
| 2495.0393                                          | 2494.9395   | -0.0998 | -40   | 284        | 311      | GFGDGYNGYGGGPGGG  |             |         |                  |      | Mascot      |     |     |     |     |
|                                                    |             |         |       |            |          | NFGGSPGYGGGR      |             |         |                  |      |             |     |     |     |     |
| heterogeneous nuclear ribonucleoprotein A2 [Rattus |             |         |       |            |          |                   | g 157059859 |         | 36031.9          | 8.67 | 14          | 399 | 100 | 257 | 100 |

Peptide Information

| Calc. Mass | Obsrv. Mass | ± da    | ± ppm | Start Seq. | End Seq. | Sequence          | Ion Score | C. I. % | Modification     | Rank | Result Type |
|------------|-------------|---------|-------|------------|----------|-------------------|-----------|---------|------------------|------|-------------|
| 912.3805   | 912.3347    | -0.0458 | -50   | 217        | 226      | GGSDGYGSGR        |           |         |                  |      | Mascot      |
| 1013.4434  | 1013.3986   | -0.0448 | -44   | 192        | 201      | GGNFGFGDSR        |           |         |                  |      | Mascot      |
| 1013.4434  | 1013.3986   | -0.0448 | -44   | 192        | 201      | GGNFGFGDSR        | 47        | 92.31   |                  |      | Mascot      |
| 1165.5232  | 1165.6853   | 0.1621  | 139   | 109        | 117      | EDTEEHHLR         |           |         |                  |      | Mascot      |
| 1221.5529  | 1221.4976   | -0.0553 | -45   | 179        | 188      | QEMQEVQSSR        |           |         |                  |      | Mascot      |
| 1237.5477  | 1237.4938   | -0.0539 | -44   | 179        | 188      | QEMQEVQSSR        |           |         | Oxidation (M)[3] |      | Mascot      |
| 1313.598   | 1313.5437   | -0.0543 | -41   | 189        | 201      | SGRGGNFGFGDSR     | 34        | 0       |                  |      | Mascot      |
| 1313.598   | 1313.5437   | -0.0543 | -41   | 189        | 201      | SGRGGNFGFGDSR     |           |         |                  |      | Mascot      |
| 1377.6294  | 1377.5789   | -0.0505 | -37   | 202        | 216      | GGGNGFQPGPGSNFR   |           |         |                  |      | Mascot      |
| 1377.6294  | 1377.5789   | -0.0505 | -37   | 202        | 216      | GGGNGFQPGPGSNFR   | 94        | 100     |                  |      | Mascot      |
|            |             |         |       |            |          | GSDGYGSGR         |           |         |                  |      |             |
| 1410.6873  | 1410.6418   | -0.0455 | -32   | 162        | 173      | YHTINGHNAEVR      |           |         |                  |      | Mascot      |
| 1648.8071  | 1648.7543   | -0.0528 | -32   | 175        | 188      | ALSRQEMQEVQSSR    |           |         |                  |      | Mascot      |
| 1664.802   | 1664.7408   | -0.0612 | -37   | 175        | 188      | ALSRQEMQEVQSSR    |           |         | Oxidation (M)[7] |      | Mascot      |
| 1798.9221  | 1798.8584   | -0.0637 | -35   | 11         | 26       | LFIGGLSFETTEESLR  |           |         |                  |      | Mascot      |
| 1927.0171  | 1926.9421   | -0.075  | -39   | 10         | 26       | KLFIGGLSFETTEESLR |           |         |                  |      | Mascot      |
| 2189.9053  | 2189.8191   | -0.0862 | -39   | 314        | 338      | NMGGPPYGGGNYGPGGS |           |         |                  |      | Mascot      |
|            |             |         |       |            |          | GGSGGYGGR         |           |         |                  |      |             |
| 2205.9001  | 2205.8152   | -0.0849 | -38   | 314        | 338      | NMGGPPYGGGNYGPGGS |           |         | Oxidation (M)[2] |      | Mascot      |
|            |             |         |       |            |          | GGSGGYGGR         |           |         |                  |      |             |
| 2205.9001  | 2205.8152   | -0.0849 | -38   | 314        | 338      | NMGGPPYGGGNYGPGGS | 81        | 99.997  | Oxidation (M)[2] |      | Mascot      |
|            |             |         |       |            |          | GGSGGYGGR         |           |         |                  |      |             |
| 2220.0706  | 2219.9822   | -0.0884 | -40   | 118        | 135      | DYFEYQKIDTIEITDR  |           |         |                  |      | Mascot      |
| 2270.9919  | 2270.9021   | -0.0898 | -40   | 202        | 226      | GGGNGFQPGPGSNFRG  |           |         |                  |      | Mascot      |
|            |             |         |       |            |          | GSDGYGSGR         |           |         |                  |      |             |
| 2270.9919  | 2270.9021   | -0.0898 | -40   | 202        | 226      | GGGNGFQPGPGSNFRG  | 2         | 0       |                  |      | Mascot      |
|            |             |         |       |            |          | GSDGYGSGR         |           |         |                  |      |             |
| 2495.0393  | 2494.9395   | -0.0998 | -40   | 227        | 254      | GFGDGYNGYGGGPGGG  |           |         |                  |      | Mascot      |
|            |             |         |       |            |          | NFGGSPGYGGGR      |           |         |                  |      |             |

| heterogeneous nuclear ribonucleoproteins A2/B1<br>[Pongo abelii] |             |         |       |            |          | g 197101465                      | 37380.7   | 8.98    | 14               | 397  | 100         | 257 | 100 |
|------------------------------------------------------------------|-------------|---------|-------|------------|----------|----------------------------------|-----------|---------|------------------|------|-------------|-----|-----|
| Peptide Information                                              |             |         |       |            |          |                                  |           |         |                  |      |             |     |     |
| Calc. Mass                                                       | Obsrv. Mass | ± da    | ± ppm | Start Seq. | End Seq. | Sequence                         | Ion Score | C. I. % | Modification     | Rank | Result Type |     |     |
| 912.3805                                                         | 912.3347    | -0.0458 | -50   | 229        | 238      | GGSDGYGSGR                       |           |         |                  |      | Mascot      |     |     |
| 1013.4434                                                        | 1013.3986   | -0.0448 | -44   | 204        | 213      | GGNFGFGDSR                       |           |         |                  |      | Mascot      |     |     |
| 1013.4434                                                        | 1013.3986   | -0.0448 | -44   | 204        | 213      | GGNFGFGDSR                       | 47        | 92.31   |                  |      | Mascot      |     |     |
| 1165.5232                                                        | 1165.6853   | 0.1621  | 139   | 121        | 129      | EDTEEHLR                         |           |         |                  |      | Mascot      |     |     |
| 1221.5529                                                        | 1221.4976   | -0.0553 | -45   | 191        | 200      | QEMQEVQSSR                       |           |         |                  |      | Mascot      |     |     |
| 1237.5477                                                        | 1237.4938   | -0.0539 | -44   | 191        | 200      | QEMQEVQSSR                       |           |         | Oxidation (M)[3] |      | Mascot      |     |     |
| 1313.598                                                         | 1313.5437   | -0.0543 | -41   | 201        | 213      | SGRGGNFGFGDSR                    | 34        | 0       |                  |      | Mascot      |     |     |
| 1313.598                                                         | 1313.5437   | -0.0543 | -41   | 201        | 213      | SGRGGNFGFGDSR                    |           |         |                  |      | Mascot      |     |     |
| 1377.6294                                                        | 1377.5789   | -0.0505 | -37   | 214        | 228      | GGGNGFQPGPGSNFR                  | 24        |         |                  |      | Mascot      |     |     |
| 1377.6294                                                        | 1377.5789   | -0.0505 | -37   | 214        | 228      | GGGNGFQPGPGSNFR                  | 94        | 100     |                  |      | Mascot      |     |     |
| 1648.8071                                                        | 1648.7543   | -0.0528 | -32   | 187        | 200      | ALSRQEMQEVQSSR                   |           |         |                  |      | Mascot      |     |     |
| 1664.802                                                         | 1664.7408   | -0.0612 | -37   | 187        | 200      | ALSRQEMQEVQSSR                   |           |         | Oxidation (M)[7] |      | Mascot      |     |     |
| 1798.9221                                                        | 1798.8584   | -0.0637 | -35   | 23         | 38       | LFIGGLSFETTEESLR                 |           |         |                  |      | Mascot      |     |     |
| 1927.0171                                                        | 1926.9421   | -0.075  | -39   | 22         | 38       | KLFIGGLSFETTEESLR                |           |         |                  |      | Mascot      |     |     |
| 2189.9053                                                        | 2189.8191   | -0.0862 | -39   | 326        | 350      | NMGGPPYGGGNYGPGGS<br>GGSGGYGGR   |           |         |                  |      | Mascot      |     |     |
| 2205.9001                                                        | 2205.8152   | -0.0849 | -38   | 326        | 350      | NMGGPPYGGGNYGPGGS<br>GGSGGYGGR   |           |         | Oxidation (M)[2] |      | Mascot      |     |     |
| 2205.9001                                                        | 2205.8152   | -0.0849 | -38   | 326        | 350      | NMGGPPYGGGNYGPGGS<br>GGSGGYGGR   | 81        | 99.997  | Oxidation (M)[2] |      | Mascot      |     |     |
| 2220.0706                                                        | 2219.9822   | -0.0884 | -40   | 130        | 147      | DYFEFYQKIDTIEITDR                |           |         |                  |      | Mascot      |     |     |
| 2270.9919                                                        | 2270.9021   | -0.0898 | -40   | 214        | 238      | GGGNGFQPGPGSNFRG<br>GSDGYGSGR    |           |         |                  |      | Mascot      |     |     |
| 2270.9919                                                        | 2270.9021   | -0.0898 | -40   | 214        | 238      | GGGNGFQPGPGSNFRG<br>GSDGYGSGR    | 2         | 0       |                  |      | Mascot      |     |     |
| 2277.155                                                         | 2277.0657   | -0.0893 | -39   | 154        | 173      | GFGVTFDDHPVDKIVL<br>CK           |           |         |                  |      | Mascot      |     |     |
| 2495.0393                                                        | 2494.9395   | -0.0998 | -40   | 239        | 266      | GFGDGYNGYGGGPGGG<br>NFGGSPGYGGGR |           |         |                  |      | Mascot      |     |     |

| heterogeneous nuclear ribonucleoproteins A2/B1 |             |         |       |            |          | g 157265559       | 37454.7   | 8.97    | 14               | 397  | 100         | 257 | 100 |  |
|------------------------------------------------|-------------|---------|-------|------------|----------|-------------------|-----------|---------|------------------|------|-------------|-----|-----|--|
| [Rattus norvegicus]                            |             |         |       |            |          |                   |           |         |                  |      |             |     |     |  |
| Peptide Information                            |             |         |       |            |          |                   |           |         |                  |      |             |     |     |  |
| Calc. Mass                                     | Obsrv. Mass | ± da    | ± ppm | Start Seq. | End Seq. | Sequence          | Ion Score | C. I. % | Modification     | Rank | Result Type |     |     |  |
| 912.3805                                       | 912.3347    | -0.0458 | -50   | 229        | 238      | GGSDGYGSGR        |           |         |                  |      | Mascot      |     |     |  |
| 1013.4434                                      | 1013.3986   | -0.0448 | -44   | 204        | 213      | GGNFGFGDSR        |           |         |                  |      | Mascot      |     |     |  |
| 1013.4434                                      | 1013.3986   | -0.0448 | -44   | 204        | 213      | GGNFGFGDSR        | 47        | 92.31   |                  |      | Mascot      |     |     |  |
| 1165.5232                                      | 1165.6853   | 0.1621  | 139   | 121        | 129      | EDTEEHLR          |           |         |                  |      | Mascot      |     |     |  |
| 1221.5529                                      | 1221.4976   | -0.0553 | -45   | 191        | 200      | QEMQEVQSSR        |           |         |                  |      | Mascot      |     |     |  |
| 1237.5477                                      | 1237.4938   | -0.0539 | -44   | 191        | 200      | QEMQEVQSSR        |           |         | Oxidation (M)[3] |      | Mascot      |     |     |  |
| 1313.598                                       | 1313.5437   | -0.0543 | -41   | 201        | 213      | SGRGGNFGFGDSR     | 34        | 0       |                  |      | Mascot      |     |     |  |
| 1313.598                                       | 1313.5437   | -0.0543 | -41   | 201        | 213      | SGRGGNFGFGDSR     |           |         |                  |      | Mascot      |     |     |  |
| 1377.6294                                      | 1377.5789   | -0.0505 | -37   | 214        | 228      | GGGNGFQPGPGSNFR   |           |         |                  |      | Mascot      |     |     |  |
| 1377.6294                                      | 1377.5789   | -0.0505 | -37   | 214        | 228      | GGGNGFQPGPGSNFR   | 94        | 100     |                  |      | Mascot      |     |     |  |
| 1410.6873                                      | 1410.6418   | -0.0455 | -32   | 174        | 185      | YHTINGHNAEVR      |           |         |                  |      | Mascot      |     |     |  |
| 1648.8071                                      | 1648.7543   | -0.0528 | -32   | 187        | 200      | ALSRQEMQEVQSSR    |           |         |                  |      | Mascot      |     |     |  |
| 1664.802                                       | 1664.7408   | -0.0612 | -37   | 187        | 200      | ALSRQEMQEVQSSR    |           |         | Oxidation (M)[7] |      | Mascot      |     |     |  |
| 1798.9221                                      | 1798.8584   | -0.0637 | -35   | 23         | 38       | LFIGGLSFETTEESLR  |           |         |                  |      | Mascot      |     |     |  |
| 1927.0171                                      | 1926.9421   | -0.075  | -39   | 22         | 38       | KLFIGGLSFETTEESLR |           |         |                  |      | Mascot      |     |     |  |
| 2189.9053                                      | 2189.8191   | -0.0862 | -39   | 326        | 350      | NMGGPPYGGGNYGPGGS |           |         |                  |      | Mascot      |     |     |  |

|   |                                                                                                     |             |         |      |    |     |     |     |     |
|---|-----------------------------------------------------------------------------------------------------|-------------|---------|------|----|-----|-----|-----|-----|
| 8 | PREDICTED: similar to heterogeneous nuclear ribonucleoprotein A2/B1 isoform 2 isoform 25 [Canis fam | gjl73976130 | 37385.6 | 8.59 | 14 | 396 | 100 | 257 | 100 |
|---|-----------------------------------------------------------------------------------------------------|-------------|---------|------|----|-----|-----|-----|-----|

|                                         |             |         |      |    |     |     |     |     |
|-----------------------------------------|-------------|---------|------|----|-----|-----|-----|-----|
| mCG119114, isoform CRA_a [Mus musculus] | gj148666221 | 38136.4 | 9.35 | 14 | 395 | 100 | 257 | 100 |
|-----------------------------------------|-------------|---------|------|----|-----|-----|-----|-----|

|                                             |             |       |      |    |     |     |     |     |
|---------------------------------------------|-------------|-------|------|----|-----|-----|-----|-----|
| PREDICTED: similar to heterogeneous nuclear | gi 73976122 | 38498 | 8.29 | 14 | 394 | 100 | 257 | 100 |
|---------------------------------------------|-------------|-------|------|----|-----|-----|-----|-----|

|     |        |                   |                |               |                    |
|-----|--------|-------------------|----------------|---------------|--------------------|
| Pos | 23/A18 | Instr./Gel Origin | AB4700/110211A | Process Statu | Analysis Succeeded |
|-----|--------|-------------------|----------------|---------------|--------------------|





|           |           |         |     |     |     |                               |     |        |                         |        |
|-----------|-----------|---------|-----|-----|-----|-------------------------------|-----|--------|-------------------------|--------|
| 1356.7058 | 1356.6621 | -0.0437 | -32 | 194 | 204 | YRGFSIPDVFR                   | 58  | 99.035 |                         | Mascot |
| 1437.7697 | 1437.7344 | -0.0353 | -25 | 38  | 50  | GVTNVTVDTKR                   |     |        |                         | Mascot |
| 1844.9752 | 1844.9117 | -0.0635 | -34 | 96  | 113 | LAALNPESNTAGLDIFAK            |     |        |                         | Mascot |
| 1844.9752 | 1844.9117 | -0.0635 | -34 | 96  | 113 | LAALNPESNTAGLDIFAK            | 104 | 100    |                         | Mascot |
| 1932.9735 | 1932.9086 | -0.0649 | -34 | 167 | 183 | FLDGNELTLADCNLLPK             |     |        | Carbamidomethyl (C)[12] | Mascot |
| 2061.0684 | 2061      | -0.0684 | -33 | 166 | 183 | KFLDGNELTLADCNLLPK            |     |        | Carbamidomethyl (C)[13] | Mascot |
| 2573.1235 | 2573.0415 | -0.082  | -32 | 217 | 238 | EEFASTCPDDEEIELAYE QVAK       | 119 | 100    | Carbamidomethyl (C)[7]  | Mascot |
| 2573.1235 | 2573.0415 | -0.082  | -32 | 217 | 238 | EEFASTCPDDEEIELAYE QVAK       |     |        | Carbamidomethyl (C)[7]  | Mascot |
| 2992.3906 | 2992.2966 | -0.094  | -31 | 139 | 165 | VLDNYLTSPLPDEVDETS AEDEGISQR  |     |        |                         | Mascot |
| 2992.3906 | 2992.2966 | -0.094  | -31 | 139 | 165 | VLDNYLTSPLPDEVDETS AEDEGISQR  | 226 | 100    |                         | Mascot |
| 3120.4856 | 3120.3865 | -0.0991 | -32 | 139 | 166 | VLDNYLTSPLPDEVDETS AEDEGISQRK |     |        |                         | Mascot |

2 CLIC1 [Bos taurus] g|67005529 15727 4.86 10 614 100 478 100

| Peptide Information |             |         |       |            |          |                               |           |         |                         | Rank | Result Type |
|---------------------|-------------|---------|-------|------------|----------|-------------------------------|-----------|---------|-------------------------|------|-------------|
| Calc. Mass          | Obsrv. Mass | ± da    | ± ppm | Start Seq. | End Seq. | Sequence                      | Ion Score | C. I. % | Modification            |      |             |
| 1037.5415           | 1037.5038   | -0.0377 | -36   | 95         | 103      | GFSIPDVFR                     | 74        | 99.974  |                         |      | Mascot      |
| 1037.5415           | 1037.5038   | -0.0377 | -36   | 95         | 103      | GFSIPDVFR                     |           |         |                         |      | Mascot      |
| 1095.6343           | 1095.5762   | -0.0581 | -53   | 83         | 91       | LHIQVQVCK                     |           |         | Carbamidomethyl (C)[8]  |      | Mascot      |
| 1223.7292           | 1223.681    | -0.0482 | -39   | 83         | 92       | LHIQVQVCKK                    |           |         | Carbamidomethyl (C)[8]  |      | Mascot      |
| 1328.644            | 1328.5989   | -0.0451 | -34   | 19         | 30       | NSNPALNDNLEK                  |           |         |                         |      | Mascot      |
| 1356.7058           | 1356.6621   | -0.0437 | -32   | 93         | 103      | YRGFSIPDVFR                   |           |         |                         |      | Mascot      |
| 1356.7058           | 1356.6621   | -0.0437 | -32   | 93         | 103      | YRGFSIPDVFR                   | 58        | 99.035  |                         |      | Mascot      |
| 1932.9735           | 1932.9086   | -0.0649 | -34   | 66         | 82       | FLDGNELTLADCNLLPK             |           |         | Carbamidomethyl (C)[12] |      | Mascot      |
| 2061.0684           | 2061        | -0.0684 | -33   | 65         | 82       | KFLDGNELTLADCNLLPK            |           |         | Carbamidomethyl (C)[13] |      | Mascot      |
| 2573.1235           | 2573.0415   | -0.082  | -32   | 116        | 137      | EEFASTCPDDEEIELAYE QVAK       | 119       | 100     | Carbamidomethyl (C)[7]  |      | Mascot      |
| 2573.1235           | 2573.0415   | -0.082  | -32   | 116        | 137      | EEFASTCPDDEEIELAYE QVAK       |           |         | Carbamidomethyl (C)[7]  |      | Mascot      |
| 2992.3906           | 2992.2966   | -0.094  | -31   | 38         | 64       | VLDNYLTSPLPDEVDETS AEDEGISQR  |           |         |                         |      | Mascot      |
| 2992.3906           | 2992.2966   | -0.094  | -31   | 38         | 64       | VLDNYLTSPLPDEVDETS AEDEGISQR  | 226       | 100     |                         |      | Mascot      |
| 3120.4856           | 3120.3865   | -0.0991 | -32   | 38         | 65       | VLDNYLTSPLPDEVDETS AEDEGISQRK |           |         |                         |      | Mascot      |

3 chloride intracellular channel 1 variant [Homo sapiens] g|62898319 26997.8 5.09 14 570 100 372 100

| Peptide Information |             |         |       |            |          |                              |           |         |                         | Rank | Result Type |
|---------------------|-------------|---------|-------|------------|----------|------------------------------|-----------|---------|-------------------------|------|-------------|
| Calc. Mass          | Obsrv. Mass | ± da    | ± ppm | Start Seq. | End Seq. | Sequence                     | Ion Score | C. I. % | Modification            |      |             |
| 1021.4883           | 1021.4472   | -0.0411 | -40   | 21         | 29       | IGNCPFSQR                    |           |         |                         |      | Mascot      |
| 1037.5415           | 1037.5038   | -0.0377 | -36   | 196        | 204      | GFTIPEAFR                    | 8         | 0       |                         |      | Mascot      |
| 1037.5415           | 1037.5038   | -0.0377 | -36   | 196        | 204      | GFTIPEAFR                    |           |         |                         |      | Mascot      |
| 1065.6166           | 1065.5616   | -0.055  | -52   | 30         | 37       | LFMVLWLK                     |           |         | Oxidation (M)[3]        |      | Mascot      |
| 1078.5098           | 1078.4714   | -0.0384 | -36   | 21         | 29       | IGNCPFSQR                    |           |         | Carbamidomethyl (C)[4]  |      | Mascot      |
| 1078.5098           | 1078.4714   | -0.0384 | -36   | 21         | 29       | IGNCPFSQR                    | 78        | 99.988  | Carbamidomethyl (C)[4]  |      | Mascot      |
| 1095.6343           | 1095.5762   | -0.0581 | -53   | 184        | 192      | LHIQVQVCK                    |           |         | Carbamidomethyl (C)[8]  |      | Mascot      |
| 1223.7292           | 1223.681    | -0.0482 | -39   | 184        | 193      | LHIQVQVCKK                   |           |         | Carbamidomethyl (C)[8]  |      | Mascot      |
| 1328.644            | 1328.5989   | -0.0451 | -34   | 120        | 131      | NSNPALNDNLEK                 |           |         |                         |      | Mascot      |
| 1356.7058           | 1356.6621   | -0.0437 | -32   | 194        | 204      | YRGFTIPEAFR                  |           |         |                         |      | Mascot      |
| 1356.7058           | 1356.6621   | -0.0437 | -32   | 194        | 204      | YRGFTIPEAFR                  | 22        | 0       |                         |      | Mascot      |
| 1437.7697           | 1437.7344   | -0.0353 | -25   | 38         | 50       | GVTNVTVDTKR                  |           |         |                         |      | Mascot      |
| 1844.9752           | 1844.9117   | -0.0635 | -34   | 96         | 113      | LAALNPESNTAGLDIFAK           |           |         |                         |      | Mascot      |
| 1844.9752           | 1844.9117   | -0.0635 | -34   | 96         | 113      | LAALNPESNTAGLDIFAK           | 104       | 100     |                         |      | Mascot      |
| 1932.9735           | 1932.9086   | -0.0649 | -34   | 167        | 183      | FLDGNELTLADCNLLPK            |           |         | Carbamidomethyl (C)[12] |      | Mascot      |
| 2061.0684           | 2061        | -0.0684 | -33   | 166        | 183      | KFLDGNELTLADCNLLPK           |           |         | Carbamidomethyl (C)[13] |      | Mascot      |
| 2573.1235           | 2573.0415   | -0.082  | -32   | 217        | 238      | EEFASTCPDDEEIELAYE QVAK      | 119       | 100     | Carbamidomethyl (C)[7]  |      | Mascot      |
| 2573.1235           | 2573.0415   | -0.082  | -32   | 217        | 238      | EEFASTCPDDEEIELAYE QVAK      |           |         | Carbamidomethyl (C)[7]  |      | Mascot      |
| 2992.3906           | 2992.2966   | -0.094  | -31   | 139        | 165      | VLDNYLTSPLPEEVDETS AEDEGVSR  |           |         |                         |      | Mascot      |
| 2992.3906           | 2992.2966   | -0.094  | -31   | 139        | 165      | VLDNYLTSPLPEEVDETS AEDEGVSR  | 49        | 92.085  |                         |      | Mascot      |
| 3120.4854           | 3120.3865   | -0.0989 | -32   | 139        | 166      | VLDNYLTSPLPEEVDETS AEDEGVSRK |           |         |                         |      | Mascot      |

4 Chain A, Crystal Structure Analysis Of M32a Mutant Of Human Clic1 g|297787716 26257.5 5.27 13 552 100 372 100

| Peptide Information |             |         |       |            |          |                              |           |         |                         | Rank | Result Type |
|---------------------|-------------|---------|-------|------------|----------|------------------------------|-----------|---------|-------------------------|------|-------------|
| Calc. Mass          | Obsrv. Mass | ± da    | ± ppm | Start Seq. | End Seq. | Sequence                     | Ion Score | C. I. % | Modification            |      |             |
| 1021.4883           | 1021.4472   | -0.0411 | -40   | 16         | 24       | IGNCPFSQR                    |           |         |                         |      | Mascot      |
| 1037.5415           | 1037.5038   | -0.0377 | -36   | 191        | 199      | GFTIPEAFR                    | 8         | 0       |                         |      | Mascot      |
| 1037.5415           | 1037.5038   | -0.0377 | -36   | 191        | 199      | GFTIPEAFR                    |           |         |                         |      | Mascot      |
| 1078.5098           | 1078.4714   | -0.0384 | -36   | 16         | 24       | IGNCPFSQR                    |           |         | Carbamidomethyl (C)[4]  |      | Mascot      |
| 1078.5098           | 1078.4714   | -0.0384 | -36   | 16         | 24       | IGNCPFSQR                    | 78        | 99.988  | Carbamidomethyl (C)[4]  |      | Mascot      |
| 1095.6343           | 1095.5762   | -0.0581 | -53   | 179        | 187      | LHIQVQVCK                    |           |         | Carbamidomethyl (C)[8]  |      | Mascot      |
| 1223.7292           | 1223.681    | -0.0482 | -39   | 179        | 188      | LHIQVQVCKK                   |           |         | Carbamidomethyl (C)[8]  |      | Mascot      |
| 1328.644            | 1328.5989   | -0.0451 | -34   | 115        | 126      | NSNPALNDNLEK                 |           |         |                         |      | Mascot      |
| 1356.7058           | 1356.6621   | -0.0437 | -32   | 189        | 199      | YRGFTIPEAFR                  |           |         |                         |      | Mascot      |
| 1356.7058           | 1356.6621   | -0.0437 | -32   | 189        | 199      | YRGFTIPEAFR                  | 22        | 0       |                         |      | Mascot      |
| 1437.7697           | 1437.7344   | -0.0353 | -25   | 33         | 45       | GVTNVTVDTKR                  |           |         |                         |      | Mascot      |
| 1844.9752           | 1844.9117   | -0.0635 | -34   | 91         | 108      | LAALNPESNTAGLDIFAK           |           |         |                         |      | Mascot      |
| 1844.9752           | 1844.9117   | -0.0635 | -34   | 91         | 108      | LAALNPESNTAGLDIFAK           | 104       | 100     |                         |      | Mascot      |
| 1932.9735           | 1932.9086   | -0.0649 | -34   | 162        | 178      | FLDGNELTLADCNLLPK            |           |         | Carbamidomethyl (C)[12] |      | Mascot      |
| 2061.0684           | 2061        | -0.0684 | -33   | 161        | 178      | KFLDGNELTLADCNLLPK           |           |         | Carbamidomethyl (C)[13] |      | Mascot      |
| 2573.1235           | 2573.0415   | -0.082  | -32   | 212        | 233      | EEFASTCPDDEEIELAYE QVAK      | 119       | 100     | Carbamidomethyl (C)[7]  |      | Mascot      |
| 2573.1235           | 2573.0415   | -0.082  | -32   | 212        | 233      | EEFASTCPDDEEIELAYE QVAK      |           |         | Carbamidomethyl (C)[7]  |      | Mascot      |
| 2992.3906           | 2992.2966   | -0.094  | -31   | 134        | 160      | VLDNYLTSPLPEEVDETS AEDEGVSR  |           |         |                         |      | Mascot      |
| 2992.3906           | 2992.2966   | -0.094  | -31   | 134        | 160      | VLDNYLTSPLPEEVDETS AEDEGVSR  | 49        | 92.085  |                         |      | Mascot      |
| 3120.4854           | 3120.3865   | -0.0989 | -32   | 134        | 161      | VLDNYLTSPLPEEVDETS AEDEGVSRK |           |         |                         |      | Mascot      |

5 Chain A, Crystal Structure Analysis Of M32a Mutant Of Human Clic1 g|302566277 26845.7 5.09 13 551 100 372 100

| Peptide Information |             |         |       |            |          |                    |           |         |                         | Rank | Result Type |
|---------------------|-------------|---------|-------|------------|----------|--------------------|-----------|---------|-------------------------|------|-------------|
| Calc. Mass          | Obsrv. Mass | ± da    | ± ppm | Start Seq. | End Seq. | Sequence           | Ion Score | C. I. % | Modification            |      |             |
| 1021.4883           | 1021.4472   | -0.0411 | -40   | 21         | 29       | IGNCPFSQR          |           |         |                         |      | Mascot      |
| 1037.5415           | 1037.5038   | -0.0377 | -36   | 196        | 204      | GFTIPEAFR          | 8         | 0       |                         |      | Mascot      |
| 1037.5415           | 1037.5038   | -0.0377 | -36   | 196        | 204      | GFTIPEAFR          |           |         |                         |      | Mascot      |
| 1078.5098           | 1078.4714   | -0.0384 | -36   | 21         | 29       | IGNCPFSQR          |           |         | Carbamidomethyl (C)[4]  |      | Mascot      |
| 1078.5098           | 1078.4714   | -0.0384 | -36   | 21         | 29       | IGNCPFSQR          | 78        | 99.988  | Carbamidomethyl (C)[4]  |      | Mascot      |
| 1095.6343           | 1095.5762   | -0.0581 | -53   | 184        | 192      | LHIQVQVCK          |           |         | Carbamidomethyl (C)[8]  |      | Mascot      |
| 1223.7292           | 1223.681    | -0.0482 | -39   | 184        | 193      | LHIQVQVCKK         |           |         | Carbamidomethyl (C)[8]  |      | Mascot      |
| 1328.644            | 1328.5989   | -0.0451 | -34   | 120        | 131      | NSNPALNDNLEK       |           |         |                         |      | Mascot      |
| 1356.7058           | 1356.6621   | -0.0437 | -32   | 194        | 204      | YRGFTIPEAFR        |           |         |                         |      | Mascot      |
| 1356.7058           | 1356.6621   | -0.0437 | -32   | 194        | 204      | YRGFTIPEAFR        | 22        | 0       |                         |      | Mascot      |
| 1437.7697           | 1437.7344   | -0.0353 | -25   | 38         | 50       | GVTNVTVDTKR        |           |         |                         |      | Mascot      |
| 1844.9752           | 1844.9117   | -0.0635 | -34   | 96         | 113      | LAALNPESNTAGLDIFAK |           |         |                         |      | Mascot      |
| 1844.9752           | 1844.9117   | -0.0635 | -34   | 96         | 113      | LAALNPESNTAGLDIFAK | 104       | 100     |                         |      | Mascot      |
| 1932.9735           | 1932.9086   | -0.0649 | -34   | 167        | 183      | FLDGNELTLADCNLLPK  |           |         | Carbamidomethyl (C)[12] |      | Mascot      |
| 2061.0684           | 2061        | -0.0684 | -33   | 166        | 183      | KFLDGNELTLADCNLLPK |           |         | Carbamidomethyl (C)[13] |      | Mascot      |
| 2573.1235           | 2573.0415   | -0.082  | -32   | 217        | 238      | EEFASTCPDDEEIELAYE | 119       | 100     | Carbamidomethyl (C)[7]  |      | Mascot      |

|   |                                                                                                 |           |           |         |     |     |     |                                  |    |        |                        |        |
|---|-------------------------------------------------------------------------------------------------|-----------|-----------|---------|-----|-----|-----|----------------------------------|----|--------|------------------------|--------|
| 6 | Chain A, Crystal Structure Of A Soluble Form Of Clic1.<br>An Intracellular Chloride Ion Channel | 2573.1235 | 2573.0415 | -0.082  | -32 | 217 | 238 | QVAK<br>EEFASTCPDDEIELAYE        | 49 | 92.085 | Carbamidomethyl (C)[7] | Mascot |
|   |                                                                                                 | 2992.3906 | 2992.2966 | -0.094  | -31 | 139 | 165 | VLDNYLTSPLPEEVDETS<br>QVAK       |    |        |                        | Mascot |
|   |                                                                                                 | 2992.3906 | 2992.2966 | -0.094  | -31 | 139 | 165 | AEDEGVSSOR<br>VLDNYLTSPLPEEVDETS |    |        |                        | Mascot |
|   |                                                                                                 | 3120.4854 | 3120.3865 | -0.0989 | -32 | 139 | 166 | AEDEGVSSOR<br>VLDNYLTSPLPEEVDETS |    |        |                        | Mascot |
|   |                                                                                                 |           |           |         |     |     |     | AEDEGVSSOR                       |    |        |                        |        |

gi|17943341 26834.7 5.09 12 479 100 323 100

| Peptide information |             |         |       |            |          |                        |           |         |                         | Rank                    | Result Type |
|---------------------|-------------|---------|-------|------------|----------|------------------------|-----------|---------|-------------------------|-------------------------|-------------|
| Calc. Mass          | Obsrv. Mass | ± da    | ± ppm | Start Seq. | End Seq. | Sequence               | Ion Score | C. I. % | Modification            |                         |             |
| 1021.4883           | 1021.4472   | -0.0411 | -40   | 21         | 29       | IGNCPFSOR              | 8         | 0       |                         | Mascot                  |             |
| 1037.5415           | 1037.5038   | -0.0377 | -36   | 196        | 204      | GFTIPEAFR              |           |         |                         | Mascot                  |             |
| 1037.5415           | 1037.5038   | -0.0377 | -36   | 196        | 204      | GFTIPEAFR              |           |         |                         | Mascot                  |             |
| 1065.6166           | 1065.5616   | -0.055  | -52   | 30         | 37       | LFMVLWLK               |           |         |                         | Mascot                  |             |
| 1078.5098           | 1078.4714   | -0.0384 | -36   | 21         | 29       | IGNCPFSOR              |           |         |                         | Mascot                  |             |
| 1078.5098           | 1078.4714   | -0.0384 | -36   | 21         | 29       | IGNCPFSOR              | 78        | 99.988  |                         | Carbamidomethyl [C][4]  | Mascot      |
| 1095.6343           | 1095.5762   | -0.0581 | -53   | 184        | 192      | LHIVQVCK               |           |         |                         | Carbamidomethyl [C][8]  | Mascot      |
| 1223.7292           | 1223.681    | -0.0482 | -39   | 184        | 193      | LHIVQVCKK              |           |         |                         | Carbamidomethyl [C][8]  | Mascot      |
| 1328.644            | 1328.5989   | -0.0451 | -34   | 120        | 131      | NSNPALNDNLEK           |           |         |                         |                         | Mascot      |
| 1356.7058           | 1356.6621   | -0.0437 | -32   | 194        | 204      | YRGFTIPEAFR            |           |         |                         |                         | Mascot      |
| 1356.7058           | 1356.6621   | -0.0437 | -32   | 194        | 204      | YRGFTIPEAFR            | 22        | 0       |                         |                         | Mascot      |
| 1437.7697           | 1437.7344   | -0.0353 | -25   | 38         | 50       | GVTFNVTVDTKR           |           |         |                         |                         | Mascot      |
| 1844.9752           | 1844.9117   | -0.0635 | -34   | 96         | 113      | LAALNPESNTAGLDIFAK     |           |         |                         |                         | Mascot      |
| 1844.9752           | 1844.9117   | -0.0635 | -34   | 96         | 113      | LAALNPESNTAGLDIFAK     |           |         |                         |                         | Mascot      |
| 1932.9735           | 1932.9086   | -0.0649 | -34   | 167        | 183      | FLDGNELTLADCNLLPK      |           |         |                         |                         | Mascot      |
| 2061.0684           | 2061        | -0.0684 | -33   | 166        | 183      | KFLDGNELTLADCNLLPK     |           |         | Carbamidomethyl [C][12] | Mascot                  |             |
| 2573.1235           | 2573.0415   | -0.082  | -32   | 217        | 238      | EEFASTCPDDEIELAYE QVAK | 119       | 100     |                         | Carbamidomethyl [C][13] | Mascot      |
| 2573.1235           | 2573.0415   | -0.082  | -32   | 217        | 238      | EEFASTCPDDEIELAYE QVAK |           |         |                         | Carbamidomethyl [C][7]  | Mascot      |

7 PREDICTED: LOW QUALITY PROTEIN: chloride intracellular channel protein 1-like [Pongo abeli] gi|297677724 26986.8 5.09 13 467 100 294 100

| Peptide Information |             |         |       |            |          |                              |           |         |              | Rank   | Result Type            |        |
|---------------------|-------------|---------|-------|------------|----------|------------------------------|-----------|---------|--------------|--------|------------------------|--------|
| Calc. Mass          | Obsrv. Mass | ± da    | ± ppm | Start Seq. | End Seq. | Sequence                     | Ion Score | C. I. % | Modification |        |                        |        |
| 1037.5415           | 1037.5038   | -0.0377 | -36   | 196        | 204      | GFTIPEAFR                    | 8         | 0       |              | Mascot |                        |        |
| 1037.5415           | 1037.5038   | -0.0377 | -36   | 196        | 204      | GFTIPEAFR                    |           |         | Mascot       |        |                        |        |
| 1065.6166           | 1065.5616   | -0.055  | -52   | 30         | 37       | LFMVLWLK                     |           |         | Mascot       |        |                        |        |
| 1095.6343           | 1095.5762   | -0.0581 | -53   | 184        | 192      | LHIVQVCK                     |           |         | Mascot       |        |                        |        |
| 1223.7292           | 1223.681    | -0.0482 | -39   | 184        | 193      | LHIVQVCKK                    |           |         | Mascot       |        |                        |        |
| 1328.644            | 1328.5989   | -0.0451 | -34   | 120        | 131      | NSNPALNDNLEK                 | 22        | 0       |              | Mascot |                        |        |
| 1356.7058           | 1356.6621   | -0.0437 | -32   | 194        | 204      | YRGFTIPEAFR                  |           |         | Mascot       |        |                        |        |
| 1356.7058           | 1356.6621   | -0.0437 | -32   | 194        | 204      | YRGFTIPEAFR                  |           |         | Mascot       |        |                        |        |
| 1437.7697           | 1437.7344   | -0.0353 | -25   | 38         | 50       | GVTFNVITVDTKR                |           |         | Mascot       |        |                        |        |
| 1844.9752           | 1844.9117   | -0.0635 | -34   | 96         | 113      | LAALNPESNTAGLDIFAK           |           |         | Mascot       |        |                        |        |
| 1844.9752           | 1844.9117   | -0.0635 | -34   | 96         | 113      | LAALNPESNTAGLDIFAK           | 104       | 100     |              | Mascot |                        |        |
| 1932.9735           | 1932.9086   | -0.0649 | -34   | 167        | 183      | FLDGNELTLADCNLLPK            |           |         | Mascot       |        |                        |        |
| 2061.0684           | 2061        | -0.0684 | -33   | 166        | 183      | KFLDGNELTLADCNLLPK           |           |         | Mascot       |        |                        |        |
| 2573.1235           | 2573.0415   | -0.082  | -32   | 217        | 238      | EEFASTCPDDEIELAYE QVAK       |           |         | 119          | 100    | Carbamidomethyl (C)[7] | Mascot |
| 2573.1235           | 2573.0415   | -0.082  | -32   | 217        | 238      | EEFASTCPDDEIELAYE QVAK       |           |         |              |        | Carbamidomethyl (C)[7] | Mascot |
| 2992.3906           | 2992.2966   | -0.094  | -31   | 139        | 165      | VLDNYLTSPLPVEEDETS AEDEGVSQR | 49        | 92.085  |              | Mascot |                        |        |
| 2992.3906           | 2992.2966   | -0.094  | -31   | 139        | 165      | VLDNYLTSPLPVEEDETS AEDEGVSQR |           |         | Mascot       |        |                        |        |
| 3120.4854           | 3120.3865   | -0.0989 | -32   | 139        | 166      | VLDNYLTSPLPVEEDETS           |           |         | Mascot       |        |                        |        |
|                     |             |         |       |            |          |                              |           |         |              |        |                        |        |
|                     |             |         |       |            |          |                              |           |         |              |        |                        |        |

8 p64 CLCP [Homo sapiens] Peptide Information gi|895845 23528.1 5.12 12 457 100 294 100

| Calc. Mass | Obsrv. Mass | ± da    | ± ppm | Start Seq. | End Seq. | Sequence                         | Ion Score | C. I. % | Modification           | Rank | Result Type |  |  |
|------------|-------------|---------|-------|------------|----------|----------------------------------|-----------|---------|------------------------|------|-------------|--|--|
| 1037.5415  | 1037.5038   | -0.0377 | -36   | 165        | 173      | GFTIPEAFR                        | 8         | 0       |                        |      | Mascot      |  |  |
| 1037.5415  | 1037.5038   | -0.0377 | -36   | 165        | 173      | GFTIPEAFR                        |           |         |                        |      | Mascot      |  |  |
| 1095.6343  | 1095.5762   | -0.0581 | -53   | 153        | 161      | LHIVQVCK                         |           |         | Carbamidomethyl (C)[8] |      | Mascot      |  |  |
| 1223.7292  | 1223.681    | -0.0482 | -39   | 153        | 162      | LHIVQVCKK                        |           |         |                        |      | Mascot      |  |  |
| 1328.644   | 1328.5989   | -0.0451 | -34   | 89         | 100      | NSNPALNDNLEK                     |           |         |                        |      | Mascot      |  |  |
| 1356.7058  | 1356.6621   | -0.0437 | -32   | 163        | 173      | YRGFTIPEAFR                      | 22        | 0       |                        |      | Mascot      |  |  |
| 1356.7058  | 1356.6621   | -0.0437 | -32   | 163        | 173      | YRGFTIPEAFR                      |           |         |                        |      | Mascot      |  |  |
| 1437.7697  | 1437.7344   | -0.0353 | -25   | 7          | 19       | GVTFNVTVDTKR                     |           |         |                        |      | Mascot      |  |  |
| 1844.9752  | 1844.9117   | -0.0635 | -34   | 65         | 82       | LAALNPESNTAGLDIFAK               |           | 100     |                        |      | Mascot      |  |  |
| 1844.9752  | 1844.9117   | -0.0635 | -34   | 65         | 82       | LAALNPESNTAGLDIFAK               |           |         |                        |      | Mascot      |  |  |
| 1932.9735  | 1932.9086   | -0.0649 | -34   | 136        | 152      | FLDGNELTLADCNLLPK                |           |         |                        |      | Mascot      |  |  |
| 2061.0684  | 2061        | -0.0684 | -33   | 135        | 152      | KFLDGNELTLADCNLLPK               |           | 100     |                        |      | Mascot      |  |  |
| 2573.1235  | 2573.0415   | -0.082  | -32   | 186        | 207      | EEFASTCPDDEIELAYE<br>QVAK        |           |         |                        |      | Mascot      |  |  |
| 2573.1235  | 2573.0415   | -0.082  | -32   | 186        | 207      | EEFASTCPDDEIELAYE<br>QVAK        |           |         | Carbamidomethyl (C)[7] |      | Mascot      |  |  |
| 2992.3906  | 2992.2966   | -0.094  | -31   | 108        | 134      | VLDNYLTSPLPEEVDETS<br>AEDEGVSSR  |           |         |                        |      | Mascot      |  |  |
| 2992.3906  | 2992.2966   | -0.094  | -31   | 108        | 134      | VLDNYLTSPLPEEVDETS<br>AEDEGVSSR  | 49        | 92.085  |                        |      | Mascot      |  |  |
| 3120.4854  | 3120.3865   | -0.0989 | -32   | 108        | 135      | VLDNYLTSPLPEEVDETS<br>AEDEGVSSRK |           |         |                        |      | Mascot      |  |  |
| 3120.4854  | 3120.3865   | -0.0989 | -32   | 108        | 135      | VLDNYLTSPLPEEVDETS<br>AEDEGVSSRK |           |         |                        |      | Mascot      |  |  |

9 Chain A, Crystal Structure Analysis Of R29mE81M DOUBLE MUTANT OF HUMAN CLIC1 Peptide Information gi|310943005 26882.7 5.07 12 450 100 294 100

| Calc. Mass | Obsrv. Mass | ± da    | ± ppm | Start Seq. | End Seq. | Sequence                      | Ion Score | C. I. % | Modification           | Rank | Result Type |  |  |
|------------|-------------|---------|-------|------------|----------|-------------------------------|-----------|---------|------------------------|------|-------------|--|--|
| 1037.5415  | 1037.5038   | -0.0377 | -36   | 196        | 204      | GFTIPEAFR                     | 8         | 0       |                        |      | Mascot      |  |  |
| 1037.5415  | 1037.5038   | -0.0377 | -36   | 196        | 204      | GFTIPEAFR                     |           |         |                        |      | Mascot      |  |  |
| 1095.6343  | 1095.5762   | -0.0581 | -53   | 184        | 192      | LHIVQVCK                      |           |         | Carbamidomethyl (C)[8] |      | Mascot      |  |  |
| 1223.7292  | 1223.681    | -0.0482 | -39   | 184        | 193      | LHIVQVCKK                     |           |         |                        |      | Mascot      |  |  |
| 1328.644   | 1328.5989   | -0.0451 | -34   | 120        | 131      | NSNPALNDNLEK                  |           |         |                        |      | Mascot      |  |  |
| 1356.7058  | 1356.6621   | -0.0437 | -32   | 194        | 204      | YRGFTIPEAFR                   | 22        | 0       |                        |      | Mascot      |  |  |
| 1356.7058  | 1356.6621   | -0.0437 | -32   | 194        | 204      | YRGFTIPEAFR                   |           |         |                        |      | Mascot      |  |  |
| 1437.7697  | 1437.7344   | -0.0353 | -25   | 38         | 50       | GVTFNVTVDTKR                  |           | 100     |                        |      | Mascot      |  |  |
| 1844.9752  | 1844.9117   | -0.0635 | -34   | 96         | 113      | LAALNPESNTAGLDIFAK            |           |         |                        |      | Mascot      |  |  |
| 1844.9752  | 1844.9117   | -0.0635 | -34   | 96         | 113      | LAALNPESNTAGLDIFAK            |           |         |                        |      | Mascot      |  |  |
| 1932.9735  | 1932.9086   | -0.0649 | -34   | 167        | 183      | FLDGNELTLADCNLLPK             | Mascot    |         |                        |      |             |  |  |
| 2061.0684  | 2061        | -0.0684 | -33   | 166        | 183      | KFLDGNELTLADCNLLPK            | 119       |         |                        |      | Mascot      |  |  |
| 2573.1235  | 2573.0415   | -0.082  | -32   | 217        | 238      | EEFASTCPDDEIELAYE QVAK        |           |         |                        |      | Mascot      |  |  |
| 2573.1235  | 2573.0415   | -0.082  | -32   | 217        | 238      | EEFASTCPDDEIELAYE QVAK        |           |         |                        |      | Mascot      |  |  |
| 2992.3906  | 2992.2966   | -0.094  | -31   | 139        | 165      | VLDNYLTSPLPEEVDETS AEDEGVSSOR | 49        | 92.085  |                        |      | Mascot      |  |  |
| 2992.3906  | 2992.2966   | -0.094  | -31   | 139        | 165      | VLDNYLTSPLPEEVDETS AEDEGVSSOR |           |         |                        |      | Mascot      |  |  |
| 3120.4854  | 3120.3865   | -0.0989 | -32   | 139        | 166      | VLDNYLTSPLPEEVDETS AEDEGVSSOR |           |         |                        |      | Mascot      |  |  |

10 hypothetical protein PANDA\_020401 [Ailuropoda melanoleuca] Peptide Information gi|281342576 25602.2 5.39 10 414 100 301 100

| Calc. Mass | Obsrv. Mass | ± da | ± ppm | Start Seq. | End Seq. | Sequence | Ion Score | C. I. % | Modification | Rank | Result Type |
|------------|-------------|------|-------|------------|----------|----------|-----------|---------|--------------|------|-------------|
|------------|-------------|------|-------|------------|----------|----------|-----------|---------|--------------|------|-------------|







|  |           |           |         |    |     |     |                     |    |   |                           |        |
|--|-----------|-----------|---------|----|-----|-----|---------------------|----|---|---------------------------|--------|
|  | 1859.8374 | 1859.85   | 0.0126  | 7  | 35  | 49  | CPSTHSEELRDCIQK     | 19 | 0 | Carbamidomethyl (C)[1,12] | Mascot |
|  | 1859.8374 | 1859.85   | 0.0126  | 7  | 35  | 49  | CPSTHSEELRDCIQK     |    |   | Carbamidomethyl (C)[1,12] | Mascot |
|  | 2275.1453 | 2275.1421 | -0.0032 | -1 | 219 | 238 | ELLSEASFQALQESIPDIR |    |   |                           | Mascot |

|   |                                                             |  |  |  |  |  |  |            |         |      |   |     |     |     |     |
|---|-------------------------------------------------------------|--|--|--|--|--|--|------------|---------|------|---|-----|-----|-----|-----|
| 2 | glutamate–cysteine ligase regulatory subunit [Mus musculus] |  |  |  |  |  |  | gi 6680019 | 30515.6 | 5.35 | 4 | 269 | 100 | 243 | 100 |
|---|-------------------------------------------------------------|--|--|--|--|--|--|------------|---------|------|---|-----|-----|-----|-----|

Peptide Information

| Calc. Mass | Obsrv. Mass | ± da    | ± ppm | Start Seq. | End Seq. | Sequence         | Ion Score | C. I. % | Modification              | Rank | Result Type |
|------------|-------------|---------|-------|------------|----------|------------------|-----------|---------|---------------------------|------|-------------|
| 1354.6962  | 1354.6962   | 0       | 0     | 95         | 107      | LFVIGNSSSSSTR    | 95        | 100     |                           |      | Mascot      |
| 1354.6962  | 1354.6962   | 0       | 0     | 95         | 107      | LFVIGNSSSSSTR    |           |         |                           |      | Mascot      |
| 1568.8068  | 1568.7963   | -0.0105 | -7    | 206        | 218      | QFDIQLLTHNDPK    |           |         |                           |      | Mascot      |
| 1780.9453  | 1780.9487   | 0.0034  | 2     | 15         | 30       | ASTLHLQTGNLLNWGR |           |         |                           |      | Mascot      |
| 1780.9453  | 1780.9487   | 0.0034  | 2     | 15         | 30       | ASTLHLQTGNLLNWGR | 129       | 100     |                           |      | Mascot      |
| 1859.8374  | 1859.85     | 0.0126  | 7     | 35         | 49       | CPSTHSEELRDCIQK  | 19        | 0       | Carbamidomethyl (C)[1,12] |      | Mascot      |
| 1859.8374  | 1859.85     | 0.0126  | 7     | 35         | 49       | CPSTHSEELRDCIQK  |           |         | Carbamidomethyl (C)[1,12] |      | Mascot      |

|   |                                                                      |  |  |  |  |  |  |              |         |      |   |     |     |     |     |
|---|----------------------------------------------------------------------|--|--|--|--|--|--|--------------|---------|------|---|-----|-----|-----|-----|
| 3 | PREDICTED: glutamate–cysteine ligase regulatory subunit [Sus scrofa] |  |  |  |  |  |  | gi 194035719 | 30470.7 | 5.84 | 4 | 247 | 100 | 221 | 100 |
|---|----------------------------------------------------------------------|--|--|--|--|--|--|--------------|---------|------|---|-----|-----|-----|-----|

Peptide Information

| Calc. Mass | Obsrv. Mass | ± da    | ± ppm | Start Seq. | End Seq. | Sequence         | Ion Score | C. I. % | Modification              | Rank | Result Type |
|------------|-------------|---------|-------|------------|----------|------------------|-----------|---------|---------------------------|------|-------------|
| 1419.7896  | 1419.7936   | 0.004   | 3     | 239        | 249      | AHEWVPLWLLR      |           |         |                           |      | Mascot      |
| 1419.7896  | 1419.7936   | 0.004   | 3     | 239        | 249      | AHEWVPLWLLR      | 75        | 99.979  |                           |      | Mascot      |
| 1568.8068  | 1568.7963   | -0.0105 | -7    | 206        | 218      | QFDIQLLTHNDPK    |           |         |                           |      | Mascot      |
| 1780.9453  | 1780.9487   | 0.0034  | 2     | 15         | 30       | ASTLHLQTGNLLNWGR |           |         |                           |      | Mascot      |
| 1780.9453  | 1780.9487   | 0.0034  | 2     | 15         | 30       | ASTLHLQTGNLLNWGR | 129       | 100     |                           |      | Mascot      |
| 1859.8374  | 1859.85     | 0.0126  | 7     | 35         | 49       | CPSTHSEELRDCIQK  | 19        | 0       | Carbamidomethyl (C)[1,12] |      | Mascot      |
| 1859.8374  | 1859.85     | 0.0126  | 7     | 35         | 49       | CPSTHSEELRDCIQK  |           |         | Carbamidomethyl (C)[1,12] |      | Mascot      |

|   |                                                                                     |  |  |  |  |  |  |              |         |      |   |     |     |     |     |
|---|-------------------------------------------------------------------------------------|--|--|--|--|--|--|--------------|---------|------|---|-----|-----|-----|-----|
| 4 | PREDICTED: glutamate cysteine ligase, modifier subunit-like [Oryctolagus cuniculus] |  |  |  |  |  |  | gi 291398479 | 30627.8 | 6.11 | 4 | 138 | 100 | 112 | 100 |
|---|-------------------------------------------------------------------------------------|--|--|--|--|--|--|--------------|---------|------|---|-----|-----|-----|-----|

Peptide Information

| Calc. Mass | Obsrv. Mass | ± da    | ± ppm | Start Seq. | End Seq. | Sequence        | Ion Score | C. I. % | Modification              | Rank | Result Type |
|------------|-------------|---------|-------|------------|----------|-----------------|-----------|---------|---------------------------|------|-------------|
| 1354.6962  | 1354.6962   | 0       | 0     | 95         | 107      | LFVIGNSSSSSTR   | 95        | 100     |                           |      | Mascot      |
| 1354.6962  | 1354.6962   | 0       | 0     | 95         | 107      | LFVIGNSSSSSTR   |           |         |                           |      | Mascot      |
| 1568.8068  | 1568.7963   | -0.0105 | -7    | 206        | 218      | QFDIQLLTHNDPK   |           |         |                           |      | Mascot      |
| 1758.9021  | 1758.9036   | 0.0015  | 1     | 50         | 64       | TLNEWSSQISPELVR |           |         |                           |      | Mascot      |
| 1859.8374  | 1859.85     | 0.0126  | 7     | 35         | 49       | CPSTHSEELRDCIQK | 19        | 0       | Carbamidomethyl (C)[1,12] |      | Mascot      |
| 1859.8374  | 1859.85     | 0.0126  | 7     | 35         | 49       | CPSTHSEELRDCIQK |           |         | Carbamidomethyl (C)[1,12] |      | Mascot      |

|   |                                                           |  |  |  |  |  |  |              |       |      |   |     |     |     |     |
|---|-----------------------------------------------------------|--|--|--|--|--|--|--------------|-------|------|---|-----|-----|-----|-----|
| 5 | hypothetical protein PANDA_006349 [Aluropoda melanoleuca] |  |  |  |  |  |  | gi 281345802 | 23404 | 4.95 | 3 | 133 | 100 | 113 | 100 |
|---|-----------------------------------------------------------|--|--|--|--|--|--|--------------|-------|------|---|-----|-----|-----|-----|

Peptide Information

| Calc. Mass | Obsrv. Mass | ± da    | ± ppm | Start Seq. | End Seq. | Sequence         | Ion Score | C. I. % | Modification           | Rank | Result Type |
|------------|-------------|---------|-------|------------|----------|------------------|-----------|---------|------------------------|------|-------------|
| 1354.6962  | 1354.6962   | 0       | 0     | 31         | 43       | LFVIGNSSSSSTR    | 95        | 100     |                        |      | Mascot      |
| 1354.6962  | 1354.6962   | 0       | 0     | 31         | 43       | LFVIGNSSSSSTR    |           |         |                        |      | Mascot      |
| 1568.8068  | 1568.7963   | -0.0105 | -7    | 142        | 154      | QFDIQLLTHNDPK    |           |         |                        |      | Mascot      |
| 1859.8844  | 1859.85     | -0.0344 | -18   | 1          | 16       | EFPDVLECTVSHAVEK | 18        | 0       | Carbamidomethyl (C)[8] |      | Mascot      |
| 1859.8844  | 1859.85     | -0.0344 | -18   | 1          | 16       | EFPDVLECTVSHAVEK |           |         | Carbamidomethyl (C)[8] |      | Mascot      |

|   |                                                                             |  |  |  |  |  |  |              |         |      |   |     |     |     |     |
|---|-----------------------------------------------------------------------------|--|--|--|--|--|--|--------------|---------|------|---|-----|-----|-----|-----|
| 6 | PREDICTED: glutamate–cysteine ligase regulatory subunit-like [Pongo abelii] |  |  |  |  |  |  | gi 297664402 | 30656.8 | 5.91 | 3 | 131 | 100 | 114 | 100 |
|---|-----------------------------------------------------------------------------|--|--|--|--|--|--|--------------|---------|------|---|-----|-----|-----|-----|

Peptide Information

| Calc. Mass | Obsrv. Mass | ± da    | ± ppm | Start Seq. | End Seq. | Sequence        | Ion Score | C. I. % | Modification              | Rank | Result Type |
|------------|-------------|---------|-------|------------|----------|-----------------|-----------|---------|---------------------------|------|-------------|
| 1354.6962  | 1354.6962   | 0       | 0     | 95         | 107      | LFVIGNSSSSSTR   | 95        | 100     |                           |      | Mascot      |
| 1354.6962  | 1354.6962   | 0       | 0     | 95         | 107      | LFVIGNSSSSSTR   |           |         |                           |      | Mascot      |
| 1568.8068  | 1568.7963   | -0.0105 | -7    | 206        | 218      | QFDIQLLTHNDPK   |           |         |                           |      | Mascot      |
| 1859.8374  | 1859.85     | 0.0126  | 7     | 35         | 49       | CPSTHSEELRDCIQK | 19        | 0       | Carbamidomethyl (C)[1,12] |      | Mascot      |
| 1859.8374  | 1859.85     | 0.0126  | 7     | 35         | 49       | CPSTHSEELRDCIQK |           |         | Carbamidomethyl (C)[1,12] |      | Mascot      |

|   |                                                                                                    |  |  |  |  |  |  |             |         |      |   |     |     |     |     |
|---|----------------------------------------------------------------------------------------------------|--|--|--|--|--|--|-------------|---------|------|---|-----|-----|-----|-----|
| 7 | PREDICTED: similar to Glutamate–cysteine ligase regulatory subunit [Gamma-glutamylcysteine synthet |  |  |  |  |  |  | gi 73960027 | 30497.6 | 5.13 | 3 | 130 | 100 | 113 | 100 |
|---|----------------------------------------------------------------------------------------------------|--|--|--|--|--|--|-------------|---------|------|---|-----|-----|-----|-----|

Peptide Information

| Calc. Mass | Obsrv. Mass | ± da    | ± ppm | Start Seq. | End Seq. | Sequence         | Ion Score | C. I. % | Modification           | Rank | Result Type |
|------------|-------------|---------|-------|------------|----------|------------------|-----------|---------|------------------------|------|-------------|
| 1354.6962  | 1354.6962   | 0       | 0     | 93         | 105      | LFVIGNSSSSSTR    | 95        | 100     |                        |      | Mascot      |
| 1354.6962  | 1354.6962   | 0       | 0     | 93         | 105      | LFVIGNSSSSSTR    |           |         |                        |      | Mascot      |
| 1568.8068  | 1568.7963   | -0.0105 | -7    | 204        | 216      | QFDIQLLTHNDPK    |           |         |                        |      | Mascot      |
| 1859.8844  | 1859.85     | -0.0344 | -18   | 63         | 78       | EFPDVLECTVSHAVEK | 18        | 0       | Carbamidomethyl (C)[8] |      | Mascot      |
| 1859.8844  | 1859.85     | -0.0344 | -18   | 63         | 78       | EFPDVLECTVSHAVEK |           |         | Carbamidomethyl (C)[8] |      | Mascot      |

|   |                                               |  |  |  |  |  |  |             |         |      |   |     |     |     |     |
|---|-----------------------------------------------|--|--|--|--|--|--|-------------|---------|------|---|-----|-----|-----|-----|
| 8 | unnamed protein product [Macaca fascicularis] |  |  |  |  |  |  | gi 90084521 | 30654.8 | 5.91 | 3 | 129 | 100 | 112 | 100 |
|---|-----------------------------------------------|--|--|--|--|--|--|-------------|---------|------|---|-----|-----|-----|-----|

Peptide Information

| Calc. Mass | Obsrv. Mass | ± da    | ± ppm | Start Seq. | End Seq. | Sequence        | Ion Score | C. I. % | Modification              | Rank | Result Type |
|------------|-------------|---------|-------|------------|----------|-----------------|-----------|---------|---------------------------|------|-------------|
| 1354.6962  | 1354.6962   | 0       | 0     | 95         | 107      | LFVIGNSSSSSTR   | 95        | 100     |                           |      | Mascot      |
| 1354.6962  | 1354.6962   | 0       | 0     | 95         | 107      | LFVIGNSSSSSTR   |           |         |                           |      | Mascot      |
| 1568.8068  | 1568.7963   | -0.0105 | -7    | 206        | 218      | QFDIQLLTHNDPK   |           |         |                           |      | Mascot      |
| 1859.8374  | 1859.85     | 0.0126  | 7     | 35         | 49       | CPSTHSEELRDCIQK | 19        | 0       | Carbamidomethyl (C)[1,12] |      | Mascot      |
| 1859.8374  | 1859.85     | 0.0126  | 7     | 35         | 49       | CPSTHSEELRDCIQK |           |         | Carbamidomethyl (C)[1,12] |      | Mascot      |

|   |                                                                                      |  |  |  |  |  |  |              |         |      |   |     |     |     |     |
|---|--------------------------------------------------------------------------------------|--|--|--|--|--|--|--------------|---------|------|---|-----|-----|-----|-----|
| 9 | PREDICTED: glutamate–cysteine ligase regulatory subunit-like [Aluropoda melanoleuca] |  |  |  |  |  |  | gi 301765118 | 36194.7 | 5.36 | 3 | 129 | 100 | 113 | 100 |
|---|--------------------------------------------------------------------------------------|--|--|--|--|--|--|--------------|---------|------|---|-----|-----|-----|-----|

Peptide Information

| Calc. Mass | Obsrv. Mass | ± da    | ± ppm | Start Seq. | End Seq. | Sequence         | Ion Score | C. I. % | Modification           | Rank | Result Type |
|------------|-------------|---------|-------|------------|----------|------------------|-----------|---------|------------------------|------|-------------|
| 1354.6962  | 1354.6962   | 0       | 0     | 147        | 159      | LFVIGNSSSSSTR    | 95        | 100     |                        |      | Mascot      |
| 1354.6962  | 1354.6962   | 0       | 0     | 147        | 159      | LFVIGNSSSSSTR    |           |         |                        |      | Mascot      |
| 1568.8068  | 1568.7963   | -0.0105 | -7    | 258        | 270      | QFDIQLLTHNDPK    |           |         |                        |      | Mascot      |
| 1859.8844  | 1859.85     | -0.0344 | -18   | 117        | 132      | EFPDVLECTVSHAVEK | 18        | 0       | Carbamidomethyl (C)[8] |      | Mascot      |
| 1859.8844  | 1859.85     | -0.0344 | -18   | 117        | 132      | EFPDVLECTVSHAVEK |           |         | Carbamidomethyl (C)[8] |      | Mascot      |

|    |                                                                                                     |  |  |  |  |  |  |              |         |      |   |     |     |     |     |
|----|-----------------------------------------------------------------------------------------------------|--|--|--|--|--|--|--------------|---------|------|---|-----|-----|-----|-----|
| 10 | PREDICTED: similar to deoxynucleotidyltransferase, terminal, interacting protein 2 [Equus caballus] |  |  |  |  |  |  | gi 194211100 | 86469.2 | 5.19 | 4 | 125 | 100 | 113 | 100 |
|----|-----------------------------------------------------------------------------------------------------|--|--|--|--|--|--|--------------|---------|------|---|-----|-----|-----|-----|

Peptide Information

| Calc. Mass | Obsrv. Mass | ± da    | ± ppm | Start Seq. | End Seq. | Sequence         | Ion Score | C. I. % | Modification           | Rank | Result Type |
|------------|-------------|---------|-------|------------|----------|------------------|-----------|---------|------------------------|------|-------------|
| 912.4897   | 912.4852    | -0.0045 | -5    | 320        | 327      | HSTPOSKK         |           |         |                        |      | Mascot      |
| 1354.6962  | 1354.6962   | 0       | 0     | 59         | 71       | LFVIGNSSSSSTR    | 95        | 100     |                        |      | Mascot      |
| 1354.6962  | 1354.6962   | 0       | 0     | 59         | 71       | LFVIGNSSSSSTR    |           |         |                        |      | Mascot      |
| 1568.8068  | 1568.7963   | -0.0105 | -7    | 170        | 182      | QFDIQLLTHNDPK    |           |         |                        |      | Mascot      |
| 1859.8844  | 1859.85     | -0.0344 | -18   | 29         | 44       | EFPDVLECTVSHAVEK | 18        | 0       | Carbamidomethyl (C)[8] |      | Mascot      |
| 1859.8844  | 1859.85     | -0.0344 | -18   | 29         | 44       | EFPDVLECTVSHAVEK |           |         | Carbamidomethyl (C)[8] |      | Mascot      |

| <div> <div> Gel Idx/Pos</div> <div>27/B1</div> </div> <div> <div>Plate #/ Name</div> <div>[1] 8907</div> </div> | Species | Instr./Gel Origin      | Accession No.  | Protein MW | Protein PI | Process Status | Analysis  |
|-----------------------------------------------------------------------------------------------------------------|---------|------------------------|----------------|------------|------------|----------------|-----------|
|                                                                                                                 |         | Instrument Sample Name | AB4700/110211A |            |            | Spectra        | Succeeded |

| Rank | Protein Name | Protein PI | Protein Score | Protein C. I. % |
|------|--------------|------------|---------------|-----------------|---------------|-----------------|---------------|-----------------|---------------|-----------------|---------------|-----------------|---------------|-----------------|---------------|-----------------|
|------|--------------|------------|---------------|-----------------|---------------|-----------------|---------------|-----------------|---------------|-----------------|---------------|-----------------|---------------|-----------------|---------------|-----------------|

|   |                                                                      |  |  |  |  |  |  |            |         |      |   |     |     |     |     |
|---|----------------------------------------------------------------------|--|--|--|--|--|--|------------|---------|------|---|-----|-----|-----|-----|
| 1 | myosin regulatory light chain 2 (clone YU63), brain - rat (fragment) |  |  |  |  |  |  | gi 1363305 | 12463.8 | 4.21 | 7 | 413 | 100 | 323 | 100 |
|---|----------------------------------------------------------------------|--|--|--|--|--|--|------------|---------|------|---|-----|-----|-----|-----|

Peptide Information

| Calc. Mass | Obsrv. Mass | ± da    | ± ppm | Start Seq. | End Seq. | Sequence            | Ion Score | C. I. % | Modification           | Rank | Result Type |
|------------|-------------|---------|-------|------------|----------|---------------------|-----------|---------|------------------------|------|-------------|
| 1051.5089  | 1051.5688   | 0.0599  | 57    | 62         | 70       | ELLTTMGDR           |           |         | Oxidation (M)[6]       |      | Mascot      |
| 1228.6168  | 1228.4633   | -0.1535 | -125  | 31         | 41       | LNQTDPEDVIR         |           |         |                        |      | Mascot      |
| 1260.6007  | 1260.4459   | -0.1548 | -123  | 89         | 98       | GNFNYYEFTFR         | 89        | 100     |                        |      | Mascot      |
| 1260.6007  | 1260.4459   | -0.1548 | -123  | 89         | 98       | GNFNYYEFTFR         |           |         |                        |      | Mascot      |
| 1388.6957  | 1388.533    | -0.1627 | -117  | 88         | 98       | KGNFNYYEFTFR        | 46        | 83.825  |                        |      | Mascot      |
| 1388.6957  | 1388.533    | -0.1627 | -117  | 88         | 98       | KGNFNYYEFTFR        |           |         |                        |      | Mascot      |
| 1415.6324  | 1415.464    | -0.1684 | -119  | 71         | 81       | FTDEEVDELYR         |           |         |                        |      | Mascot      |
| 2350.0293  | 2349.7424   | -0.2869 | -122  | 42         | 61       | NAFACDFEAEATGTIQEDY |           |         | Carbamidomethyl (C)[5] |      | Mascot      |





|   |                                                                            |                        |                    |            |            |           |                                      |                        |         |                                          |              |         |      |   |      |        |        |     |                  |
|---|----------------------------------------------------------------------------|------------------------|--------------------|------------|------------|-----------|--------------------------------------|------------------------|---------|------------------------------------------|--------------|---------|------|---|------|--------|--------|-----|------------------|
|   | 1790.8126<br>3062.593                                                      | 1790.6387<br>3062.2976 | -0.1739<br>-0.2954 | -96<br>-96 | 133<br>46  | 146<br>73 | HELOANCYEEVKDR<br>NILEEGKEILGVDVGQTV | Carbamidomethyl (C)[7] |         |                                          |              |         |      |   |      |        |        |     | Mascot<br>Mascot |
|   | 3062.593                                                                   | 3062.2976              | -0.2954            | -96        | 46         | 73        | NILEEGKEILGVDVGQTV<br>DDPYATFVK      |                        | 83      | 99.998                                   |              |         |      |   |      |        |        |     | Mascot           |
| 4 | PREDICTED: coflin-1 like isoform 1 [Macaca mulatta]<br>Peptide Information |                        |                    |            |            |           |                                      |                        |         |                                          | gil297267399 | 16816.8 | 8.48 | 8 | 297  |        | 100    | 222 | 100              |
|   | Calc. Mass                                                                 | Obsrv. Mass            | ± da               | ± ppm      | Start Seq. | End Seq.  | Sequence                             | Ion Score              | C. I. % | Modification                             |              |         |      |   | Rank | Result | Type   |     |                  |
|   | 1034.4758                                                                  | 1034.3728              | -0.103             | -100       | 57         | 64        | MLPDKDCR                             |                        |         | Carbamidomethyl (C)[7]                   |              |         |      |   |      |        | Mascot |     |                  |
|   | 1050.4707                                                                  | 1050.358               | -0.1127            | -107       | 57         | 64        | MLPDKDCR                             |                        |         | Carbamidomethyl (C)[7], Oxidation (M)[1] |              |         |      |   |      |        | Mascot |     |                  |
|   | 1309.682                                                                   | 1309.5503              | -0.1317            | -101       | 18         | 28        | AVFLCSEDDK                           |                        |         | Carbamidomethyl (C)[5]                   |              |         |      |   |      |        | Mascot |     |                  |
|   | 1337.626                                                                   | 1337.4839              | -0.1421            | -106       | 65         | 75        | YALDATYETK                           | 78                     | 99.993  |                                          |              |         |      |   |      |        | Mascot |     |                  |
|   | 1337.626                                                                   | 1337.4839              | -0.1421            | -106       | 65         | 75        | YALDATYETK                           |                        |         |                                          |              |         |      |   |      |        | Mascot |     |                  |
|   | 1340.7783                                                                  | 1340.6292              | -0.1491            | -111       | 136        | 149       | LGGSAVISLEGKPL                       |                        |         |                                          |              |         |      |   |      |        | Mascot |     |                  |
|   | 1790.8126                                                                  | 1790.6387              | -0.1739            | -97        | 116        | 129       | HELOANCYEEVKDR                       | 62                     | 99.75   | Carbamidomethyl (C)[7]                   |              |         |      |   |      |        | Mascot |     |                  |
|   | 1790.8126                                                                  | 1790.6387              | -0.1739            | -97        | 116        | 129       | HELOANCYEEVKDR                       |                        |         | Carbamidomethyl (C)[7]                   |              |         |      |   |      |        | Mascot |     |                  |
|   | 2063.0669                                                                  | 2062.8635              | -0.2034            | -99        | 79         | 95        | KEDLVFIFWAPECAPLK                    |                        |         | Carbamidomethyl (C)[13]                  |              |         |      |   |      |        | Mascot |     |                  |
|   | 2150.0991                                                                  | 2149.894               | -0.2051            | -95        | 80         | 97        | EDLVFIFWAPECAPLKS                    |                        |         | Carbamidomethyl (C)[12]                  |              |         |      |   |      |        | Mascot |     |                  |
|   | 3062.593                                                                   | 3062.2976              | -0.2954            | -96        | 29         | 56        | NILEEGKEILGVDVGQTV<br>DDPYATFVK      |                        |         |                                          |              |         |      |   |      |        | Mascot |     |                  |
|   | 3062.593                                                                   | 3062.2976              | -0.2954            | -96        | 29         | 56        | NILEEGKEILGVDVGQTV<br>DDPYATFVK      | 83                     | 99.998  |                                          |              |         |      |   |      |        | Mascot |     |                  |
| 5 | PREDICTED: coflin-1 like [Pongo abelii]<br>Peptide Information             |                        |                    |            |            |           |                                      |                        |         |                                          | gil297688141 | 16798.7 | 8.54 | 6 | 273  |        | 100    | 222 | 100              |
|   | Calc. Mass                                                                 | Obsrv. Mass            | ± da               | ± ppm      | Start Seq. | End Seq.  | Sequence                             | Ion Score              | C. I. % | Modification                             |              |         |      |   | Rank | Result | Type   |     |                  |
|   | 1034.4758                                                                  | 1034.3728              | -0.103             | -100       | 57         | 64        | MLPDKDCR                             |                        |         | Carbamidomethyl (C)[7]                   |              |         |      |   |      |        | Mascot |     |                  |
|   | 1050.4707                                                                  | 1050.358               | -0.1127            | -107       | 57         | 64        | MLPDKDCR                             |                        |         | Carbamidomethyl (C)[7], Oxidation (M)[1] |              |         |      |   |      |        | Mascot |     |                  |
|   | 1309.682                                                                   | 1309.5503              | -0.1317            | -101       | 18         | 28        | AVFLCSEDDK                           |                        |         | Carbamidomethyl (C)[5]                   |              |         |      |   |      |        | Mascot |     |                  |
|   | 1337.626                                                                   | 1337.4839              | -0.1421            | -106       | 65         | 75        | YALDATYETK                           | 78                     | 99.993  |                                          |              |         |      |   |      |        | Mascot |     |                  |
|   | 1337.626                                                                   | 1337.4839              | -0.1421            | -106       | 65         | 75        | YALDATYETK                           |                        |         |                                          |              |         |      |   |      |        | Mascot |     |                  |
|   | 1340.7783                                                                  | 1340.6292              | -0.1491            | -111       | 136        | 149       | LGGSAVISLEGKPL                       |                        |         |                                          |              |         |      |   |      |        | Mascot |     |                  |
|   | 1790.8126                                                                  | 1790.6387              | -0.1739            | -97        | 116        | 129       | HELOANCYEEVKDR                       | 62                     | 99.75   | Carbamidomethyl (C)[7]                   |              |         |      |   |      |        | Mascot |     |                  |
|   | 1790.8126                                                                  | 1790.6387              | -0.1739            | -97        | 116        | 129       | HELOANCYEEVKDR                       |                        |         | Carbamidomethyl (C)[7]                   |              |         |      |   |      |        | Mascot |     |                  |
|   | 3062.593                                                                   | 3062.2976              | -0.2954            | -96        | 29         | 56        | NILEEGKEILGVDVGQTV<br>DDPYATFVK      |                        |         |                                          |              |         |      |   |      |        | Mascot |     |                  |
|   | 3062.593                                                                   | 3062.2976              | -0.2954            | -96        | 29         | 56        | NILEEGKEILGVDVGQTV<br>DDPYATFVK      | 83                     | 99.998  |                                          |              |         |      |   |      |        | Mascot |     |                  |
| 6 | coflin 1 (non-muscle), isoform CRA_c [Homo sapiens]<br>Peptide Information |                        |                    |            |            |           |                                      |                        |         |                                          | gil119594857 | 15649.2 | 8.54 | 5 | 262  |        | 100    | 222 | 100              |
|   | Calc. Mass                                                                 | Obsrv. Mass            | ± da               | ± ppm      | Start Seq. | End Seq.  | Sequence                             | Ion Score              | C. I. % | Modification                             |              |         |      |   | Rank | Result | Type   |     |                  |
|   | 1034.4758                                                                  | 1034.3728              | -0.103             | -100       | 57         | 64        | MLPDKDCR                             |                        |         | Carbamidomethyl (C)[7]                   |              |         |      |   |      |        |        |     |                  |

[illegible]



|   |                                                                                                 |              |         |      |    |     |     |     |     |
|---|-------------------------------------------------------------------------------------------------|--------------|---------|------|----|-----|-----|-----|-----|
| 4 | myosin, light polypeptide 6, alkali, smooth muscle and non-muscle, isoform CRA_c [Homo sapiens] | gij119617307 | 18025.5 | 4.68 | 10 | 340 | 100 | 219 | 100 |
|---|-------------------------------------------------------------------------------------------------|--------------|---------|------|----|-----|-----|-----|-----|

| Peptide Information |             |         |       |            |          |                 |           |         |                                           | Rank   | Result Type |
|---------------------|-------------|---------|-------|------------|----------|-----------------|-----------|---------|-------------------------------------------|--------|-------------|
| Calc. Mass          | Obsrv. Mass | ± da    | ± ppm | Start Seq. | End Seq. | Sequence        | Ion Score | C. I. % | Modification                              |        |             |
| 995.5883            | 995.5023    | -0.086  | -86   | 111        | 119      | HVLVLTQEK       |           |         |                                           | Mascot |             |
| 1025.5051           | 1025.4271   | -0.078  | -76   | 14         | 21       | EAFQLDR         | 46        | 85.212  |                                           | Mascot |             |
| 1025.5051           | 1025.4271   | -0.078  | -76   | 14         | 21       | EAFQLDR         |           |         |                                           | Mascot |             |
| 1341.6289           | 1341.5288   | -0.1001 | -75   | 27         | 37       | ILYSQCGDVMR     |           |         | Carbamidomethyl (C)[6]                    | Mascot |             |
| 1341.6289           | 1341.5288   | -0.1001 | -75   | 27         | 37       | ILYSQCGDVMR     | 57        | 98.828  | Carbamidomethyl (C)[6]                    | Mascot |             |
| 1354.7325           | 1354.6158   | -0.1167 | -86   | 38         | 50       | ALGNPTNAELK     |           |         |                                           | Mascot |             |
| 1357.6239           | 1357.5093   | -0.1146 | -84   | 27         | 37       | ILYSQCGDVMR     |           |         |                                           | Mascot |             |
| 1483.7175           | 1483.6375   | -0.11   | -74   | 14         | 26       | EAFQLDRTQSGK    |           |         | Carbamidomethyl (C)[6], Oxidation (M)[10] | Mascot |             |
| 1722.6959           | 1722.7114   | 0.0155  | 9     | 147        | 161      | CEGLQESCSHNPNA  |           |         | Carbamidomethyl (C)[1,8]                  | Mascot |             |
| 1738.8428           | 1738.7028   | -0.14   | -81   | 95         | 110      | VFDEKNGTVMGAER  |           |         | Oxidation (M)[11]                         | Mascot |             |
| 1786.8242           | 1786.6804   | -0.1438 | -80   | 80         | 94       | NKDQGTYYEDYVGLR | 103       | 100     |                                           | Mascot |             |
| 1786.8242           | 1786.6804   | -0.1438 | -80   | 80         | 94       | NKDQGTYYEDYVGLR |           |         |                                           | Mascot |             |
| 1799.8414           | 1798.6979   | -0.1435 | -80   | 22         | 37       | TDGKILYSQCGDVMR |           |         | Carbamidomethyl (C)[11]                   | Mascot |             |
| 1888.0037           | 1887.8478   | -0.1559 | -80   | 64         | 79       | VLDFEFLPMLQTVAK |           |         |                                           | Mascot |             |
| 1903.9987           | 1903.842    | -0.1567 | -82   | 64         | 79       | VLDFEFLPMLQTVAK | 13        | 0       | Oxidation (M)[10]                         | Mascot |             |
| 1903.9987           | 1903.842    | -0.1567 | -82   | 64         | 79       | VLDFEFLPMLQTVAK |           |         | Oxidation (M)[10]                         | Mascot |             |

| hypothetical protein PANDA_004079 [Ailuropoda melanoleuca] |  |             |  |          |  |           |  |            |  | gil281353259 |  | 15100.3           |  | 4.56      |  | 9       |  | 338                                       |  | 100 |  | 219  |  | 100         |  |
|------------------------------------------------------------|--|-------------|--|----------|--|-----------|--|------------|--|--------------|--|-------------------|--|-----------|--|---------|--|-------------------------------------------|--|-----|--|------|--|-------------|--|
| Peptide Information                                        |  |             |  |          |  |           |  |            |  |              |  |                   |  |           |  |         |  |                                           |  |     |  |      |  |             |  |
| Calc. Mass                                                 |  | Obsrv. Mass |  | $\pm$ da |  | $\pm$ ppm |  | Start Seq. |  | End Seq.     |  | Sequence          |  | Ion Score |  | C. I. % |  | Modification                              |  |     |  | Rank |  | Result Type |  |
| 995.5883                                                   |  | 995.5023    |  | -0.086   |  | -86       |  | 104        |  | 112          |  | HVLVLTGEK         |  |           |  |         |  |                                           |  |     |  |      |  | Mascore     |  |
| 1025.5051                                                  |  | 1025.4271   |  | -0.078   |  | -76       |  | 7          |  | 14           |  | EAFQLDR           |  | 46        |  | 85.212  |  |                                           |  |     |  |      |  | Mascore     |  |
| 1025.5051                                                  |  | 1025.4271   |  | -0.078   |  | -76       |  | 7          |  | 14           |  | EAFQLDR           |  |           |  |         |  |                                           |  |     |  |      |  | Mascore     |  |
| 1341.6289                                                  |  | 1341.5288   |  | -0.1001  |  | -75       |  | 20         |  | 30           |  | ILYSQCQGDVMR      |  |           |  |         |  | Carbamidomethyl (C)[6]                    |  |     |  |      |  | Mascore     |  |
| 1341.6289                                                  |  | 1341.5288   |  | -0.1001  |  | -75       |  | 20         |  | 30           |  | ILYSQCQGDVMR      |  | 57        |  | 98.828  |  | Carbamidomethyl (C)[6]                    |  |     |  |      |  | Mascore     |  |
| 1354.7325                                                  |  | 1354.6158   |  | -0.1167  |  | -86       |  | 31         |  | 43           |  | ALGNPNTAEVLK      |  |           |  |         |  |                                           |  |     |  |      |  | Mascore     |  |
| 1357.6239                                                  |  | 1357.5093   |  | -0.1146  |  | -84       |  | 20         |  | 30           |  | ILYSQCQGDVMR      |  |           |  |         |  | Carbamidomethyl (C)[6], Oxidation (M)[10] |  |     |  |      |  | Mascore     |  |
| 1483.7175                                                  |  | 1483.6075   |  | -0.11    |  | -74       |  | 7          |  | 19           |  | EAFQLDR           |  |           |  |         |  |                                           |  |     |  |      |  | Mascore     |  |
| 1722.8479                                                  |  | 1722.7114   |  | -0.1365  |  | -79       |  | 88         |  | 103          |  | VFDKEGNGTVMGAIEIR |  |           |  |         |  |                                           |  |     |  |      |  | Mascore     |  |
| 1738.8428                                                  |  | 1738.7028   |  | -0.14    |  | -81       |  | 88         |  | 103          |  | VFDKEGNGTVMGAIEIR |  |           |  |         |  | Oxidation (M)[11]                         |  |     |  |      |  | Mascore     |  |
| 1786.8242                                                  |  | 1786.6804   |  | -0.1438  |  | -80       |  | 73         |  | 87           |  | NKDQGTIEDYVEGLR   |  | 103       |  | 100     |  |                                           |  |     |  |      |  | Mascore     |  |
| 1786.8242                                                  |  | 1786.6804   |  | -0.1438  |  | -80       |  | 73         |  | 87           |  | NKDQGTIEDYVEGLR   |  |           |  |         |  |                                           |  |     |  |      |  | Mascore     |  |
| 1789.8414                                                  |  | 1789.6979   |  | -0.1435  |  | -80       |  | 15         |  | 30           |  | TGDGKILYSQCQGDVMR |  |           |  |         |  | Carbamidomethyl (C)[11]                   |  |     |  |      |  | Mascore     |  |
| 1888.0037                                                  |  | 1887.8478   |  | -0.1559  |  | -83       |  | 57         |  | 72           |  | VLDFEHLPLMLQTVAK  |  |           |  |         |  |                                           |  |     |  |      |  | Mascore     |  |
| 1903.9987                                                  |  | 1903.842    |  | -0.1567  |  | -82       |  | 57         |  | 72           |  | VLDFEHLPLMLQTVAK  |  | 13        |  | 0       |  | Oxidation (M)[10]                         |  |     |  |      |  | Mascore     |  |
| 1903.9987                                                  |  | 1903.842    |  | -0.1567  |  | -82       |  | 57         |  | 72           |  | VLDFEHLPLMLQTVAK  |  |           |  |         |  | Oxidation (M)[10]                         |  |     |  |      |  | Mascore     |  |

| mCG140959, isoform CRA_g [Mus musculus] |             |         |       |            |          |                  | gll148692630 | 17787.5 | 4.52                                      | 9 | 335 | 100  | 219    | 100    |  |
|-----------------------------------------|-------------|---------|-------|------------|----------|------------------|--------------|---------|-------------------------------------------|---|-----|------|--------|--------|--|
| Peptide Information                     |             |         |       |            |          |                  |              |         |                                           |   |     |      |        |        |  |
| Calc. Mass                              | Obsrv. Mass | ± da    | ± ppm | Start Seq. | End Seq. | Sequence         | Ion Score    | C. I. % | Modification                              |   |     | Rank | Result | Type   |  |
| 995.5883                                | 995.5023    | -0.086  | -86   | 112        | 120      | HVLVTLGEK        |              |         |                                           |   |     |      |        | Mascot |  |
| 1025.5051                               | 1025.4271   | -0.078  | -76   | 15         | 22       | EAFOLFDR         | 46           | 85.212  |                                           |   |     |      |        | Mascot |  |
| 1025.5051                               | 1025.4271   | -0.078  | -76   | 15         | 22       | EAFOLFDR         |              |         |                                           |   |     |      |        | Mascot |  |
| 1341.6289                               | 1341.5268   | -0.1001 | -75   | 28         | 38       | ILYSQGDVMR       | 57           | 98.828  | Carbamidomethyl (C)[6]                    |   |     |      |        | Mascot |  |
| 1341.6289                               | 1341.5268   | -0.1001 | -75   | 28         | 38       | ILYSQGDVMR       |              |         | Carbamidomethyl (C)[6]                    |   |     |      |        | Mascot |  |
| 1354.7325                               | 1354.6158   | -0.1167 | -86   | 39         | 51       | ALGNPTNAELVK     |              |         |                                           |   |     |      |        | Mascot |  |
| 1357.6239                               | 1357.5093   | -0.1146 | -84   | 28         | 38       | ILYSQGDVMR       |              |         | Carbamidomethyl (C)[6], Oxidation (M)[10] |   |     |      |        | Mascot |  |
| 1483.7175                               | 1483.6075   | -0.11   | -74   | 15         | 27       | EAFOLFDRDTGDGK   |              |         |                                           |   |     |      |        | Mascot |  |
| 1722.8479                               | 1722.7114   | -0.1365 | -79   | 96         | 111      | VFDEKNGTVMGAER   |              |         |                                           |   |     |      |        | Mascot |  |
| 1738.8428                               | 1738.7028   | -0.14   | -81   | 96         | 111      | VFDEKNGTVMGAER   |              |         | Oxidation (M)[11]                         |   |     |      |        | Mascot |  |
| 1786.8242                               | 1786.6804   | -0.1438 | -80   | 81         | 95       | NKDQGTYYDYVEGLR  | 103          | 100     |                                           |   |     |      |        | Mascot |  |
| 1786.8242                               | 1786.6804   | -0.1438 | -80   | 81         | 95       | NKDQGTYYDYVEGLR  |              |         |                                           |   |     |      |        | Mascot |  |
| 1799.8414                               | 1799.6979   | -0.1435 | -80   | 23         | 38       | TGDEGKILYSQGDVMR |              |         | Carbamidomethyl (C)[11]                   |   |     |      |        | Mascot |  |
| 1888.0337                               | 1887.8478   | -0.1559 | -83   | 65         | 80       | VLDFEFLPMLQTVAK  |              |         |                                           |   |     |      |        | Mascot |  |
| 1903.9987                               | 1903.842    | -0.1567 | -82   | 65         | 80       | VLDFEFLPMLQTVAK  | 13           | 0       | Oxidation (M)[10]                         |   |     |      |        | Mascot |  |
| 1903.9987                               | 1903.842    | -0.1567 | -82   | 65         | 80       | VLDFEFLPMLQTVAK  |              |         | Oxidation (M)[10]                         |   |     |      |        | Mascot |  |

| MyI6 protein [Rattus norvegicus] |             |         |       |            |          |                  | gI 183986294 |         | 17002.1                                  |  | 4.56 |  | 9 |  | 331 |  | 100 |      | 219    |        | 100 |  |  |
|----------------------------------|-------------|---------|-------|------------|----------|------------------|--------------|---------|------------------------------------------|--|------|--|---|--|-----|--|-----|------|--------|--------|-----|--|--|
| Peptide Information              |             |         |       |            |          |                  |              |         |                                          |  |      |  |   |  |     |  |     |      |        |        |     |  |  |
| Calc. Mass                       | Obsrv. Mass | ± da    | ± ppm | Start Seq. | End Seq. | Sequence         | Ion Score    | C. I. % | Modification                             |  |      |  |   |  |     |  |     | Rank | Result | Type   |     |  |  |
| 995.5883                         | 995.5023    | -0.086  | -86   | 111        | 119      | HVLVTLGEK        |              |         |                                          |  |      |  |   |  |     |  |     |      |        | Mascot |     |  |  |
| 1025.5051                        | 1025.4271   | -0.078  | -76   | 14         | 21       | EAFOLFDR         | 46           | 85.212  |                                          |  |      |  |   |  |     |  |     |      |        | Mascot |     |  |  |
| 1025.5051                        | 1025.4271   | -0.078  | -76   | 14         | 21       | EAFOLFDR         |              |         |                                          |  |      |  |   |  |     |  |     |      |        | Mascot |     |  |  |
| 1341.6289                        | 1341.5288   | -0.1001 | -75   | 27         | 37       | ILYSQCQDVMR      |              |         | Carbamidomethyl (C)[6]                   |  |      |  |   |  |     |  |     |      |        | Mascot |     |  |  |
| 1341.6289                        | 1341.5288   | -0.1001 | -75   | 27         | 37       | ILYSQCQDVMR      | 57           | 98.828  | Carbamidomethyl (C)[6]                   |  |      |  |   |  |     |  |     |      |        | Mascot |     |  |  |
| 1354.7325                        | 1354.6158   | -0.1167 | -88   | 38         | 50       | ALGQGNINAEULK    |              |         |                                          |  |      |  |   |  |     |  |     |      |        | Mascot |     |  |  |
| 1357.6239                        | 1357.5093   | -0.1146 | -84   | 27         | 37       | ILYSQCQDVMR      |              |         | Carbamidomethyl (C)[6], Oxidation (M)[1] |  |      |  |   |  |     |  |     |      |        | Mascot |     |  |  |
| 1483.7175                        | 1483.6075   | -0.11   | -74   | 14         | 26       | EAFOLFDRDTGGDK   |              |         |                                          |  |      |  |   |  |     |  |     |      |        | Mascot |     |  |  |
| 1722.8479                        | 1722.7114   | -0.1365 | -79   | 95         | 110      | VFDEKNGTVMGAER   |              |         |                                          |  |      |  |   |  |     |  |     |      |        | Mascot |     |  |  |
| 1738.8428                        | 1738.7028   | -0.14   | -81   | 95         | 110      | VFDEKNGTVMGAER   |              |         | Oxidation (M)[11]                        |  |      |  |   |  |     |  |     |      |        | Mascot |     |  |  |
| 1786.8242                        | 1786.6804   | -0.1438 | -80   | 80         | 94       | NKDQGTYYEDYVEGLR | 103          | 100     |                                          |  |      |  |   |  |     |  |     |      |        | Mascot |     |  |  |
| 1786.8242                        | 1786.6804   | -0.1438 | -80   | 80         | 94       | NKDQGTYYEDYVEGLR |              |         |                                          |  |      |  |   |  |     |  |     |      |        | Mascot |     |  |  |
| 1799.8414                        | 1799.6979   | -0.1435 | -80   | 22         | 37       | DGKGILYSQCQDVMR  |              |         | Carbamidomethyl (C)[11]                  |  |      |  |   |  |     |  |     |      |        | Mascot |     |  |  |
| 1888.0037                        | 1887.8478   | -0.1559 | -83   | 64         | 79       | VLDFEHLPLMLTVAK  |              |         |                                          |  |      |  |   |  |     |  |     |      |        | Mascot |     |  |  |
| 1903.9897                        | 1903.842    | -0.1567 | -82   | 64         | 79       | VLDFEHLPLMLTVAK  | 13           | 0       | Oxidation (M)[10]                        |  |      |  |   |  |     |  |     |      |        | Mascot |     |  |  |
| 1903.9897                        | 1903.842    | -0.1567 | -82   | 64         | 79       | VLDFEHLPLMLTVAK  |              |         | Oxidation (M)[10]                        |  |      |  |   |  |     |  |     |      |        | Mascot |     |  |  |

| PREDICTED: similar to myosin, light polypeptide 6,<br>alkali, smooth muscle and non-muscle isoform 1 [ |             |         |       |            |          |                  |           |         |                                           | gI/3968363 | 17946.7 | 4.43   | 9 | 330 | 100 | 219 | 100 |
|--------------------------------------------------------------------------------------------------------|-------------|---------|-------|------------|----------|------------------|-----------|---------|-------------------------------------------|------------|---------|--------|---|-----|-----|-----|-----|
| Peptide Information                                                                                    |             |         |       |            |          |                  |           |         |                                           |            |         |        |   |     |     |     |     |
| Calc. Mass                                                                                             | Obsrv. Mass | ± da    | ± ppm | Start Seq. | End Seq. | Sequence         | Ion Score | C. I. % | Modification                              | Rank       | Result  | Type   |   |     |     |     |     |
| 995.5883                                                                                               | 995.5023    | -0.086  | -86   | 120        | 128      | HVLVTLGEK        |           |         |                                           |            |         | Mascot |   |     |     |     |     |
| 1025.5051                                                                                              | 1025.4271   | -0.078  | -76   | 23         | 30       | EAFOLFDR         | 46        | 85.212  |                                           |            |         | Mascot |   |     |     |     |     |
| 1025.5051                                                                                              | 1025.4271   | -0.078  | -76   | 23         | 30       | EAFOLFDR         |           |         |                                           |            |         | Mascot |   |     |     |     |     |
| 1341.6289                                                                                              | 1341.5288   | -0.1001 | -75   | 36         | 46       | ILYSQCGDVMR      |           |         | Carbamidomethyl [C][6]                    |            |         | Mascot |   |     |     |     |     |
| 1341.6289                                                                                              | 1341.5288   | -0.1001 | -75   | 36         | 46       | ILYSQCGDVMR      | 57        | 98.828  | Carbamidomethyl [C][6]                    |            |         | Mascot |   |     |     |     |     |
| 1354.7325                                                                                              | 1354.6158   | -0.1167 | -86   | 47         | 59       | ALGQNPNTAEVLK    |           |         |                                           |            |         | Mascot |   |     |     |     |     |
| 1357.6239                                                                                              | 1357.5093   | -0.1146 | -84   | 36         | 46       | ILYSQCGDVMR      |           |         | Carbamidomethyl [C][6], Oxidation [M][10] |            |         | Mascot |   |     |     |     |     |
| 1483.7175                                                                                              | 1483.6075   | -0.11   | -74   | 23         | 35       | EAFOLFRTDGDK     |           |         |                                           |            |         | Mascot |   |     |     |     |     |
| 1722.8479                                                                                              | 1722.7214   | -0.1265 | -79   | 104        | 119      | VPDKEGNTVMGAER   |           |         |                                           |            |         | Mascot |   |     |     |     |     |
| 1738.8428                                                                                              | 1738.7028   | -0.14   | -81   | 104        | 119      | VPDKEGNTVMGAER   |           |         | Oxidation [M][11]                         |            |         | Mascot |   |     |     |     |     |
| 1786.8242                                                                                              | 1786.6804   | -0.1438 | -80   | 89         | 103      | NKDQGTYYDVEGLR   | 103       | 100     |                                           |            |         | Mascot |   |     |     |     |     |
| 1786.8242                                                                                              | 1786.6804   | -0.1438 | -80   | 89         | 103      | NKDQGTYYDVEGLR   |           |         |                                           |            |         | Mascot |   |     |     |     |     |
| 1799.8414                                                                                              | 1799.6979   | -0.1435 | -80   | 31         | 46       | TGDKGLYSQCGDVMR  |           |         | Carbamidomethyl [C][11]                   |            |         | Mascot |   |     |     |     |     |
| 1888.0037                                                                                              | 1887.8478   | -0.1559 | -83   | 73         | 88       | VLDFEHLPLMLQTVAK |           |         |                                           |            |         | Mascot |   |     |     |     |     |
| 1903.9987                                                                                              | 1903.842    | -0.1567 | -82   | 73         | 88       | VLDFEHLPLMLQTVAK | 13        | 0       | Oxidation [M][10]                         |            |         | Mascot |   |     |     |     |     |
| 1903.9987                                                                                              | 1903.842    | -0.1567 | -82   | 73         | 88       | VLDFEHLPLMLQTVAK |           |         | Oxidation [M][10]                         |            |         | Mascot |   |     |     |     |     |

| myosin light polypeptide 6 [Rattus norvegicus] |             |         |       |            |          |              |           |         |                        | gl 155369650 | 16964.2 | 4.46 | 9 | 329 | 100 | 219 | 100 |
|------------------------------------------------|-------------|---------|-------|------------|----------|--------------|-----------|---------|------------------------|--------------|---------|------|---|-----|-----|-----|-----|
| Peptide Information                            |             |         |       |            |          |              |           |         |                        |              |         |      |   |     |     |     |     |
| Calc. Mass                                     | Obsrv. Mass | ± da    | ± ppm | Start Seq. | End Seq. | Sequence     | Ion Score | C. I. % | Modification           | Rank         | Result  | Type |   |     |     |     |     |
| 995.5883                                       | 995.5023    | -0.086  | -86   | 111        | 119      | HLVLTLGEK    |           |         |                        |              | Mascot  |      |   |     |     |     |     |
| 1025.5051                                      | 1025.4271   | -0.078  | -76   | 14         | 21       | EAFQLFDR     | 46        | 85.212  |                        |              | Mascot  |      |   |     |     |     |     |
| 1025.5051                                      | 1025.4271   | -0.078  | -76   | 14         | 21       | EAFQLFDR     |           |         |                        |              | Mascot  |      |   |     |     |     |     |
| 1341.6289                                      | 1341.5298   | -0.1001 | -75   | 27         | 37       | ILYSQGDVMR   |           |         | Carbamidomethyl [C][6] |              | Mascot  |      |   |     |     |     |     |
| 1341.6289                                      | 1341.5298   | -0.1001 | -75   | 27         | 37       | ILYSQGDVMR   |           |         | Carbamidomethyl [C][6] |              | Mascot  |      |   |     |     |     |     |
| 1354.7325                                      | 1354.6158   | -0.1167 | -86   | 38         | 50       | ALGGNTPAEVLK |           |         |                        |              | Mascot  |      |   |     |     |     |     |

|   |                                        |              |         |      |    |     |     |     |     |
|---|----------------------------------------|--------------|---------|------|----|-----|-----|-----|-----|
| 1 | serotransferrin precursor [Bos taurus] | gi 114326282 | 77688.7 | 6.75 | 34 | 848 | 100 | 588 | 100 |
|---|----------------------------------------|--------------|---------|------|----|-----|-----|-----|-----|

|           |           |         |     |     |     |                          |     |        |                                            |        |
|-----------|-----------|---------|-----|-----|-----|--------------------------|-----|--------|--------------------------------------------|--------|
| 1644.7111 | 1644.5682 | -0.1429 | -87 | 499 | 513 | FDEFFSAGCAPGSPR          |     |        | Carbamidomethyl (C)[9]                     | Mascot |
| 1715.9962 | 1715.7404 | -0.1558 | -91 | 153 | 166 | LYKELPDPEISQIR           |     |        |                                            | Mascot |
| 1715.9962 | 1715.7404 | -0.1558 | -91 | 153 | 166 | LYKELPDPEISQIR           | 55  | 99.3   |                                            | Mascot |
| 1752.7778 | 1752.7072 | -0.0706 | -40 | 361 | 365 | ESKPPDSSKDECMVK          |     |        | Carbamidomethyl (C)[12], Oxidation (M)[13] | Mascot |
| 1757.8606 | 1757.7017 | -0.1589 | -90 | 300 | 314 | KDPDNFQLFQSPHGK          |     |        |                                            | Mascot |
| 1768.8613 | 1768.7035 | -0.1578 | -89 | 230 | 244 | HSTVFDNLPNPEDRK          | 69  | 99.969 |                                            | Mascot |
| 1768.8613 | 1768.7035 | -0.1578 | -89 | 230 | 244 | HSTVFDNLPNPEDRK          |     |        |                                            | Mascot |
| 1939.9403 | 1939.7644 | -0.1759 | -91 | 591 | 607 | DGTRKPVTDENCHLAR         |     |        | Carbamidomethyl (C)[13]                    | Mascot |
| 1994.8159 | 1994.6495 | -0.1664 | -83 | 200 | 216 | CACSNHEPYFGYSGAFK        |     |        | Carbamidomethyl (C)[1,3]                   | Mascot |
| 2182.9609 | 2182.8054 | -0.1555 | -71 | 531 | 548 | ECVPNSNERYGYTGAF R       |     |        | Carbamidomethyl (C)[2]                     | Mascot |
| 2261.9954 | 2261.7947 | -0.2007 | -89 | 167 | 187 | AAANFFSASCVPACDQS SFPK   |     |        | Carbamidomethyl (C)[10,13]                 | Mascot |
| 2274.0066 | 2273.801  | -0.2056 | -90 | 494 | 513 | INNCKFDEFFSAGCAPGS PR    |     |        | Carbamidomethyl (C)[4,14]                  | Mascot |
| 2274.0066 | 2273.801  | -0.2056 | -90 | 494 | 513 | INNCKFDEFFSAGCAPGS PR    | 139 | 100    | Carbamidomethyl (C)[4,14]                  | Mascot |
| 2409.1326 | 2408.9216 | -0.211  | -88 | 257 | 277 | SVDDNYQECYLAMVPSH VVAR   |     |        | Carbamidomethyl (C)[8]                     | Mascot |
| 2507.2676 | 2507.0408 | -0.2268 | -90 | 278 | 299 | TVGKEDVIWELLNHAQ EHFQK   |     |        |                                            | Mascot |
| 2537.2275 | 2537.0024 | -0.2251 | -89 | 256 | 277 | KSVQNYQECYLAMVPSH AVVAR  |     |        | Carbamidomethyl (C)[9]                     | Mascot |
| 2546.0808 | 2545.8623 | -0.2185 | -86 | 380 | 402 | WSGFSGGAIECETAENT EECIAK |     |        | Carbamidomethyl (C)[11,20]                 | Mascot |

3 transferrin [Bos grunniens] 77607.8 6.92 30 739 100 533 100

| Peptide Information |             |         |       |            |          |                          |           |         |                                            | Rank | Result Type |
|---------------------|-------------|---------|-------|------------|----------|--------------------------|-----------|---------|--------------------------------------------|------|-------------|
| Calc. Mass          | Obsrv. Mass | ± da    | ± ppm | Start Seq. | End Seq. | Sequence                 | Ion Score | C. I. % | Modification                               |      |             |
| 887.4152            | 887.3389    | -0.0763 | -86   | 135        | 142      | SCHTGLGR                 |           |         | Carbamidomethyl (C)[2]                     |      | Mascot      |
| 1088.5305           | 1088.4302   | -0.1003 | -92   | 143        | 152      | SAGWNIPMGR               |           |         |                                            |      | Mascot      |
| 1097.505            | 1097.403    | -0.102  | -93   | 540        | 548      | YYGYTGAFR                | 76        | 99.995  |                                            |      | Mascot      |
| 1097.505            | 1097.403    | -0.102  | -93   | 540        | 548      | YYGYTGAFR                |           |         |                                            |      | Mascot      |
| 1104.4739           | 1104.4502   | -0.0237 | -21   | 531        | 539      | ECVPNSNER                |           |         | Carbamidomethyl (C)[2]                     |      | Mascot      |
| 1122.579            | 1122.4742   | -0.1048 | -93   | 654        | 662      | DLFRDDTK                 |           |         |                                            |      | Mascot      |
| 1156.5316           | 1156.4269   | -0.1047 | -91   | 366        | 374      | WCAIGHQER                |           |         | Carbamidomethyl (C)[2]                     |      | Mascot      |
| 1156.5316           | 1156.4269   | -0.1047 | -91   | 366        | 374      | WCAIGHQER                | 72        | 99.984  | Carbamidomethyl (C)[2]                     |      | Mascot      |
| 1215.619            | 1215.5024   | -0.1166 | -96   | 695        | 704      | LLEACTHFKP               |           |         | Carbamidomethyl (C)[5]                     |      | Mascot      |
| 1335.6976           | 1335.5708   | -0.1268 | -95   | 48         | 59       | ILESGPVSCVK              |           |         | Carbamidomethyl (C)[10]                    |      | Mascot      |
| 1346.6157           | 1346.4989   | -0.1168 | -87   | 27         | 37       | WICTITHEANK              |           |         | Carbamidomethyl (C)[2]                     |      | Mascot      |
| 1354.6056           | 1354.4852   | -0.1204 | -89   | 245        | 255      | NYELLCGDNTR              |           |         | Carbamidomethyl (C)[6]                     |      | Mascot      |
| 1389.6758           | 1389.5452   | -0.1306 | -94   | 457        | 468      | TSDANINWNLK              |           |         |                                            |      | Mascot      |
| 1447.6594           | 1447.535    | -0.1244 | -86   | 527        | 539      | GTGKECVPSNER             |           |         | Carbamidomethyl (C)[6]                     |      | Mascot      |
| 1466.6434           | 1466.5132   | -0.1302 | -89   | 671        | 682      | TYDSYLGDDYVR             | 93        | 100     |                                            |      | Mascot      |
| 1466.6434           | 1466.5132   | -0.1302 | -89   | 671        | 682      | TYDSYLGDDYVR             |           |         |                                            |      | Mascot      |
| 1482.7006           | 1482.5686   | -0.132  | -89   | 245        | 256      | NYELLCGDNTRK             |           |         | Carbamidomethyl (C)[6]                     |      | Mascot      |
| 1510.743            | 1510.6088   | -0.1342 | -89   | 595        | 607      | KPVTDANCHLAR             |           |         | Carbamidomethyl (C)[9]                     |      | Mascot      |
| 1550.8036           | 1550.6515   | -0.1521 | -98   | 480        | 493      | TAGWNIPMGLLYSK           |           |         |                                            |      | Mascot      |
| 1594.7384           | 1594.5979   | -0.1405 | -88   | 670        | 682      | KTYDSYLGDDYVR            |           |         |                                            |      | Mascot      |
| 1640.7664           | 1640.6217   | -0.1447 | -88   | 230        | 243      | HSTVFDNLPNPEDR           |           |         |                                            |      | Mascot      |
| 1644.7111           | 1644.5682   | -0.1429 | -87   | 499        | 513      | FDEFFSAGCAPGSPR          | 84        | 100     | Carbamidomethyl (C)[9]                     |      | Mascot      |
| 1644.7111           | 1644.5682   | -0.1429 | -87   | 499        | 513      | FDEFFSAGCAPGSPR          |           |         | Carbamidomethyl (C)[9]                     |      | Mascot      |
| 1752.7778           | 1752.7072   | -0.0706 | -40   | 351        | 365      | ESKPPDSSKDECMVK          |           |         | Carbamidomethyl (C)[12], Oxidation (M)[13] |      | Mascot      |
| 1757.8606           | 1757.7017   | -0.1589 | -90   | 300        | 314      | KDPDNFQLFQSPHGK          |           |         |                                            |      | Mascot      |
| 1768.8613           | 1768.7035   | -0.1578 | -89   | 230        | 244      | HSTVFDNLPNPEDRK          | 69        | 99.969  |                                            |      | Mascot      |
| 1768.8613           | 1768.7035   | -0.1578 | -89   | 230        | 244      | HSTVFDNLPNPEDRK          |           |         |                                            |      | Mascot      |
| 1939.9403           | 1939.7644   | -0.1759 | -91   | 591        | 607      | DGTRKPVTDANCHLAR         |           |         | Carbamidomethyl (C)[13]                    |      | Mascot      |
| 1994.8159           | 1994.6495   | -0.1664 | -83   | 200        | 216      | CACSNHEPYFGYSGAFK        |           |         | Carbamidomethyl (C)[1,3]                   |      | Mascot      |
| 2182.9609           | 2182.8054   | -0.1555 | -71   | 531        | 548      | ECVPNSNERYGYTGAF R       |           |         | Carbamidomethyl (C)[2]                     |      | Mascot      |
| 2274.0066           | 2273.801    | -0.2056 | -90   | 494        | 513      | INNCKFDEFFSAGCAPGS PR    |           |         | Carbamidomethyl (C)[4,14]                  |      | Mascot      |
| 2274.0066           | 2273.801    | -0.2056 | -90   | 494        | 513      | INNCKFDEFFSAGCAPGS PR    | 139       | 100     | Carbamidomethyl (C)[4,14]                  |      | Mascot      |
| 2410.1165           | 2409.9084   | -0.2081 | -86   | 257        | 277      | SVDDYQECYLAMVPSHA VVAR   |           |         | Carbamidomethyl (C)[8]                     |      | Mascot      |
| 2426.1116           | 2425.9062   | -0.2054 | -85   | 257        | 277      | SVDDYQECYLAMVPSHA VVAR   |           |         | Carbamidomethyl (C)[8], Oxidation (M)[12]  |      | Mascot      |
| 2507.2676           | 2507.0408   | -0.2268 | -90   | 278        | 299      | TVGKEDVIWELLNHAQ EHFQK   |           |         |                                            |      | Mascot      |
| 2538.2114           | 2537.9929   | -0.2185 | -86   | 256        | 277      | KSVQDYQECYLAMVPSH AVVAR  |           |         | Carbamidomethyl (C)[9]                     |      | Mascot      |
| 2546.0808           | 2545.8623   | -0.2185 | -86   | 380        | 402      | WSGFSGGAIECETAENT EECIAK |           |         | Carbamidomethyl (C)[11,20]                 |      | Mascot      |
| 2554.2065           | 2553.9893   | -0.2172 | -85   | 256        | 277      | KSVDDYQECYLAMVPSH AVVAR  |           |         | Carbamidomethyl (C)[9], Oxidation (M)[13]  |      | Mascot      |

4 hemiferrin, transferrin-like protein [Rattus norvegicus] 24075.5 7.86 11 463 100 393 100

| Peptide Information |             |         |       |            |          |                       |           |         |                           | Rank   | Result Type |
|---------------------|-------------|---------|-------|------------|----------|-----------------------|-----------|---------|---------------------------|--------|-------------|
| Calc. Mass          | Obsrv. Mass | ± da    | ± ppm | Start Seq. | End Seq. | Sequence              | Ion Score | C. I. % | Modification              |        |             |
| 1097.505            | 1097.403    | -0.102  | -93   | 53         | 61       | YYGYTGAFR             | 76        | 99.995  |                           | Mascot |             |
| 1097.505            | 1097.403    | -0.102  | -93   | 53         | 61       | YYGYTGAFR             |           |         |                           | Mascot |             |
| 1104.4739           | 1104.4502   | -0.0237 | -21   | 44         | 52       | ECVPNSNER             |           |         | Carbamidomethyl (C)[2]    | Mascot |             |
| 1122.579            | 1122.4742   | -0.1048 | -93   | 166        | 174      | DLFRDDTK              |           |         |                           | Mascot |             |
| 1215.619            | 1215.5024   | -0.1166 | -96   | 207        | 216      | LLEACTHFKP            |           |         | Carbamidomethyl (C)[5]    | Mascot |             |
| 1447.6594           | 1447.535    | -0.1244 | -86   | 40         | 52       | GTGKECVPSNSNER        |           |         | Carbamidomethyl (C)[6]    | Mascot |             |
| 1466.6434           | 1466.5132   | -0.1302 | -89   | 183        | 194      | TYDSYLGDDYVR          | 93        | 100     |                           | Mascot |             |
| 1466.6434           | 1466.5132   | -0.1302 | -89   | 183        | 194      | TYDSYLGDDYVR          |           |         |                           | Mascot |             |
| 1594.7384           | 1594.5979   | -0.1405 | -88   | 182        | 194      | KTYDSYLGDDYVR         |           |         |                           | Mascot |             |
| 1644.7111           | 1644.5682   | -0.1429 | -87   | 11         | 25       | FDEFFSAGCAPGSPR       | 84        | 100     | Carbamidomethyl (C)[9]    | Mascot |             |
| 1644.7111           | 1644.5682   | -0.1429 | -87   | 11         | 25       | FDEFFSAGCAPGSPR       |           |         | Carbamidomethyl (C)[9]    | Mascot |             |
| 1994.8583           | 1994.6495   | -0.2088 | -105  | 149        | 165      | SVTDCTSNFCLFQSNISK    |           |         | Carbamidomethyl (C)[5,10] | Mascot |             |
| 2182.9609           | 2182.8054   | -0.1555 | -71   | 44         | 61       | ECVPNSNERYGYTGAF R    |           |         | Carbamidomethyl (C)[2]    | Mascot |             |
| 2274.0066           | 2273.801    | -0.2056 | -90   | 6          | 25       | INNCKFDEFFSAGCAPGS PR |           |         | Carbamidomethyl (C)[4,14] | Mascot |             |
| 2274.0066           | 2273.801    | -0.2056 | -90   | 6          | 25       | INNCKFDEFFSAGCAPGS PR | 139       | 100     | Carbamidomethyl (C)[4,14] | Mascot |             |

5 PREDICTED: similar to Serotransferrin precursor (Transferrin) (Siderophilin) (Beta-1-metal binding) 77678.3 7.75 16 133 100 75 99.992

| Transferrin) (Siderophilin) (Beta-1-metal binding |             |         |       |            |          |                        |           |         |                          |        |
|---------------------------------------------------|-------------|---------|-------|------------|----------|------------------------|-----------|---------|--------------------------|--------|
| Peptide Information                               |             |         |       |            |          |                        |           |         |                          |        |
| Calc. Mass                                        | Obsrv. Mass | ± da    | ± ppm | Start Seq. | End Seq. | Sequence               | Ion Score | C. I. % | Modification             |        |
| 887.4152                                          | 887.3389    | -0.0763 | -86   | 134        | 141      | SCHTGLGR               |           |         | Carbamidomethyl (C)[2]   | Mascot |
| 1097.4792                                         | 1097.403    | -0.0762 | -69   | 529        | 537      | ECVPNNHER              |           |         |                          | Mascot |
| 1097.505                                          | 1097.403    | -0.102  | -93   | 538        | 546      | YYGYTGAFR              | 76        | 99.995  |                          | Mascot |
| 1250.6099                                         | 1250.5244   | -0.0855 | -68   | 364        | 374      | WCAVGHIEIAK            |           |         |                          | Mascot |
| 1310.5317                                         | 1310.5736   | 0.0419  | 32    | 375        | 385      | CDEWSVNSEGK            |           |         | Carbamidomethyl (C)[1]   | Mascot |
| 1363.7004                                         | 1363.5227   | -0.1777 | -130  | 319        | 330      | DSAEGRFRIPPK           |           |         |                          | Mascot |
| 1378.6816                                         | 1378.6095   | -0.0721 | -52   | 187        | 198      | LOQLGVGKTDK            |           |         | Carbamidomethyl (C)[2,5] | Mascot |
| 1550.6792                                         | 1550.6515   | -0.0277 | -18   | 580        | 592      | EEDFELLCPDQGR          |           |         |                          | Mascot |
| 1594.7893                                         | 1594.5979   | -0.1914 | -120  | 652        | 664      | DLFRDDTQCLAK           |           |         | Carbamidomethyl (C)[10]  | Mascot |
| 1605.8206                                         | 1605.6677   | -0.1529 | -95   | 478        | 491      | TAGWNIPMGLLYNR         |           |         |                          | Mascot |
| 1640.8643                                         | 1640.6217   | -0.2426 | -148  | 673        | 687      | SYLGAEYITAVANLR        |           |         |                          | Mascot |
| 1939.8987                                         | 1939.7644   | -0.1343 | -69   | 386        | 403      | IECESAESTEDCIAKIAK     |           |         |                          | Mascot |
| 1994.8159                                         | 1994.6495   | -0.1664 | -83   | 199        | 215      | CACSNHEPYFGYSGAFK      |           |         | Carbamidomethyl (C)[1,3] | Mascot |
| 2262.0681                                         | 2261.7947   | -0.2734 | -121  | 166        | 186      | AASSFTATSCVPCVDRTA FPK |           |         | Carbamidomethyl (C)[10]  | Mascot |
| 2273.9888                                         | 2273.801    | -0.1878 | -83   | 492        | 511      | INHCEFDKFFSQGCAPGS MR  |           |         |                          | Mascot |
| 2273.9888                                         | 2273.801    | -0.1878 | -83   | 492        | 511      | INHCEFDKFFSQGCAPGS     |           |         |                          | Mascot |





|   |                                             |             |       |      |    |     |     |     |     |
|---|---------------------------------------------|-------------|-------|------|----|-----|-----|-----|-----|
| 5 | PREDICTED: similar to Tubulin alpha-2 chain | gi 74005772 | 51037 | 4.98 | 14 | 608 | 100 | 488 | 100 |
|---|---------------------------------------------|-------------|-------|------|----|-----|-----|-----|-----|

|   |                                             | TAR         |         |      |    |     |     |     |     |  |
|---|---------------------------------------------|-------------|---------|------|----|-----|-----|-----|-----|--|
| 6 | PREDICTED: similar to Tubulin alpha-2 chain | gi 73996778 | 57397.1 | 5.04 | 14 | 601 | 100 | 488 | 100 |  |

(Alpha-tubulin 2) [Canis familiaris]

|   |                                             | YAR         |         |      |    |     |     |     |     |  |
|---|---------------------------------------------|-------------|---------|------|----|-----|-----|-----|-----|--|
| 7 | PREDICTED: similar to Tubulin alpha-6 chain | gil73996524 | 48067.5 | 4.92 | 13 | 598 | 100 | 488 | 100 |  |





[illegible]





|           |                     |                                                                                      |         |       |            |                          |                          |             |                                             |                                             |        |             |     |     |     |
|-----------|---------------------|--------------------------------------------------------------------------------------|---------|-------|------------|--------------------------|--------------------------|-------------|---------------------------------------------|---------------------------------------------|--------|-------------|-----|-----|-----|
|           | 1778.8092           | 1778.7043                                                                            | -0.1049 | -61   | 4          | 18                       | NOYDNDVTWVSPQGR          | 129         | 100                                         | Carbamidomethyl (C)[3,10], Oxidation (M)[2] | Mascot |             |     |     |     |
|           | 1857.8405           | 1857.7269                                                                            | -0.1136 | -61   | 83         | 96                       | LLCNFMFMRQECLDSR         |             |                                             | Carbamidomethyl (C)[3]                      | Mascot |             |     |     |     |
|           | 1880.834            | 1880.7311                                                                            | -0.1029 | -55   | 175        | 189                      | HMSEFMECNLNELVK          |             |                                             | Carbamidomethyl (C)[8]                      | Mascot |             |     |     |     |
|           | 1896.8289           | 1896.7249                                                                            | -0.104  | -55   | 175        | 189                      | HMSEFMECNLNELVK          |             |                                             | Carbamidomethyl (C)[8], Oxidation (M)[2]    | Mascot |             |     |     |     |
|           | 1912.8237           | 1912.708                                                                             | -0.1157 | -60   | 175        | 189                      | HMSEFMECNLNELVK          |             |                                             | Carbamidomethyl (C)[8], Oxidation (M)[2,6]  | Mascot |             |     |     |     |
|           | 2086.1404           | 2086.0156                                                                            | -0.1248 | -60   | 63         | 82                       | ILHVDNHIGISAGLTADA<br>R  | 110         | 100                                         |                                             | Mascot |             |     |     |     |
|           | 2086.1404           | 2086.0156                                                                            | -0.1248 | -60   | 63         | 82                       | ILHVDNHIGISAGLTADA<br>R  |             |                                             |                                             | Mascot |             |     |     |     |
|           | 2206.9558           | 2206.8225                                                                            | -0.1333 | -60   | 244        | 263                      | AQPTQPADEPAEAKDEP<br>MEH |             |                                             | Oxidation (M)[18]                           | Mascot |             |     |     |     |
|           | 2214.2354           | 2214.103                                                                             | -0.1324 | -60   | 62         | 82                       | KILHVDNHIGISAGLTADA<br>R |             |                                             |                                             | Mascot |             |     |     |     |
|           | 2214.2354           | 2214.103                                                                             | -0.1324 | -60   | 62         | 82                       | KILHVDNHIGISAGLTADA<br>R | 17          | 0                                           |                                             | Mascot |             |     |     |     |
|           |                     |                                                                                      |         |       |            |                          | R                        |             |                                             |                                             | Mascot |             |     |     |     |
|           | 2                   | proteasome (prosome, macropain) subunit, alpha type, 1, isoform CRA_b [Homo sapiens] |         |       |            |                          |                          | g 119588883 | 33933.2                                     | 6.64                                        | 11     | 564         | 100 | 454 | 100 |
|           | Peptide Information |                                                                                      |         |       |            |                          |                          |             |                                             |                                             |        |             |     |     |     |
|           | Calc. Mass          | Obsrv. Mass                                                                          | ± da    | ± ppm | Start Seq. | End Seq.                 | Sequence                 | Ion Score   | C. I. %                                     | Modification                                | Rank   | Result Type |     |     |     |
|           | 907.3937            | 907.3361                                                                             | -0.0576 | -63   | 133        | 139                      | QECLDSR                  |             |                                             | Carbamidomethyl (C)[3]                      | Mascot |             |     |     |     |
|           | 953.4695            | 953.4081                                                                             | -0.0614 | -64   | 126        | 132                      | LLCNFMR                  |             |                                             | Carbamidomethyl (C)[3]                      | Mascot |             |     |     |     |
|           | 953.4695            | 953.4081                                                                             | -0.0614 | -64   | 126        | 132                      | LLCNFMR                  | 39          | 25.996                                      | Carbamidomethyl (C)[3]                      | Mascot |             |     |     |     |
|           | 969.4644            | 969.3937                                                                             | -0.0707 | -73   | 126        | 132                      | LLCNFMR                  |             |                                             | Carbamidomethyl (C)[3], Oxidation (M)[6]    | Mascot |             |     |     |     |
|           | 1107.6997           | 1107.6299                                                                            | -0.0698 | -63   | 85         | 94                       | THAVLVALKR               | 74          | 99.979                                      |                                             | Mascot |             |     |     |     |
|           | 1107.6997           | 1107.6299                                                                            | -0.0698 | -63   | 85         | 94                       | THAVLVALKR               |             |                                             |                                             | Mascot |             |     |     |     |
| 1332.7423 | 1332.658            | -0.0843                                                                              | -63     | 140   | 150        | FVDRPLPVSR               | 37                       | 0           |                                             | Mascot                                      |        |             |     |     |     |
| 1332.7423 | 1332.658            | -0.0843                                                                              | -63     | 140   | 150        | FVDRPLPVSR               |                          |             |                                             | Mascot                                      |        |             |     |     |     |
| 1431.7301 | 1431.6387           | -0.0914                                                                              | -64     | 62    | 73         | IHQIYAEAVK               |                          |             |                                             | Mascot                                      |        |             |     |     |     |
| 1447.725  | 1447.627            | -0.098                                                                               | -68     | 62    | 73         | IHQIYAEAVK               |                          |             | Oxidation (M)[8]                            | Mascot                                      |        |             |     |     |     |
| 1685.9069 | 1685.8049           | -0.102                                                                               | -61     | 237   | 251        | ALRETLPAEODLTTK          | 48                       | 91.484      |                                             | Mascot                                      |        |             |     |     |     |
| 1685.9069 | 1685.8049           | -0.102                                                                               | -61     | 237   | 251        | ALRETLPAEODLTTK          |                          |             |                                             | Mascot                                      |        |             |     |     |     |
| 1778.8092 | 1778.7043           | -0.1049                                                                              | -59     | 47    | 61         | NOYDNDVTWVSPQGR          |                          |             |                                             | Mascot                                      |        |             |     |     |     |
| 1778.8092 | 1778.7043           | -0.1049                                                                              | -59     | 47    | 61         | NOYDNDVTWVSPQGR          | 129                      | 100         |                                             | Mascot                                      |        |             |     |     |     |
| 1857.8405 | 1857.7269           | -0.1136                                                                              | -61     | 126   | 139        | LLCNFMFMRQECLDSR         |                          |             | Carbamidomethyl (C)[3,10], Oxidation (M)[6] | Mascot                                      |        |             |     |     |     |
| 1880.834  | 1880.7311           | -0.1029                                                                              | -55     | 218   | 232        | HMSEFMECNLNELVK          |                          |             | Carbamidomethyl (C)[8]                      | Mascot                                      |        |             |     |     |     |
| 1896.8289 | 1896.7249           | -0.104                                                                               | -55     | 218   | 232        | HMSEFMECNLNELVK          |                          |             | Carbamidomethyl (C)[8], Oxidation (M)[2]    | Mascot                                      |        |             |     |     |     |
| 1912.8237 | 1912.708            | -0.1157                                                                              | -60     | 218   | 232        | HMSEFMECNLNELVK          |                          |             | Carbamidomethyl (C)[8], Oxidation (M)[2,6]  | Mascot                                      |        |             |     |     |     |
| 2086.1404 | 2086.0156           | -0.1248                                                                              | -60     | 106   | 125        | ILHVDNHIGISAGLTADA<br>R  | 110                      | 100         |                                             | Mascot                                      |        |             |     |     |     |
| 2086.1404 | 2086.0156           | -0.1248                                                                              | -60     | 106   | 125        | ILHVDNHIGISAGLTADA<br>R  |                          |             |                                             | Mascot                                      |        |             |     |     |     |
| 2214.2354 | 2214.103            | -0.1324                                                                              | -60     | 105   | 125        | KILHVDNHIGISAGLTADA<br>R |                          |             |                                             | Mascot                                      |        |             |     |     |     |
| 2214.2354 | 2214.103            | -0.1324                                                                              | -60     | 105   | 125        | KILHVDNHIGISAGLTADA<br>R | 17                       | 0           |                                             | Mascot                                      |        |             |     |     |     |
|           | 3                   | Proteasome (prosome, macropain) subunit, alpha type, 1 [Homo sapiens]                |         |       |            |                          |                          | g 13543551  | 29578.9                                     | 6.15                                        | 11     | 562         | 100 | 454 | 100 |
|           | Peptide Information |                                                                                      |         |       |            |                          |                          |             |                                             |                                             |        |             |     |     |     |
|           | Calc. Mass          | Obsrv. Mass                                                                          | ± da    | ± ppm | Start Seq. | End Seq.                 | Sequence                 | Ion Score   | C. I. %                                     | Modification                                | Rank   | Result Type |     |     |     |
|           | 907.3937            | 907.3361                                                                             | -0.0576 | -63   | 90         | 96                       | QECLDSR                  |             |                                             | Carbamidomethyl (C)[3]                      | Mascot |             |     |     |     |
|           | 953.4695            | 953.4081                                                                             | -0.0614 | -64</ |            |                          |                          |             |                                             |                                             |        |             |     |     |     |

|   |                                                                                                 |              |         |   |    |     |     |     |     |
|---|-------------------------------------------------------------------------------------------------|--------------|---------|---|----|-----|-----|-----|-----|
| 6 | PREDICTED: proteasome (prosome, macropain)<br>subunit, alpha type, 1 isoform 1 [Equus caballus] | gi 149719471 | 29567.8 | 6 | 11 | 559 | 100 | 454 | 100 |
|---|-------------------------------------------------------------------------------------------------|--------------|---------|---|----|-----|-----|-----|-----|

[illegible]





|    |                                                                                                |             |         |       |            |              |                                  |           |         |                         |        |             |        |     |     |
|----|------------------------------------------------------------------------------------------------|-------------|---------|-------|------------|--------------|----------------------------------|-----------|---------|-------------------------|--------|-------------|--------|-----|-----|
|    | 2541.3857                                                                                      | 2541.3242   | -0.0615 | -24   | 38         | 61           | HISLSLEVIGAGLHCPSPQ<br>LIATLK    | 124       | 100     | Carbamidomethyl (C)[14] | Mascot |             |        |     |     |
|    | 2855.5559                                                                                      | 2855.4792   | -0.0767 | -27   | 38         | 64           | HISLSLEVIGAGLHCPSPQ<br>LIATLKTGR | 113       | 100     | Carbamidomethyl (C)[14] | Mascot |             |        |     |     |
|    | 2855.5559                                                                                      | 2855.4792   | -0.0767 | -27   | 38         | 64           | HISLSLEVIGAGLHCPSPQ<br>LIATLKTGR |           |         | Carbamidomethyl (C)[14] | Mascot |             |        |     |     |
| 3  | platelet factor 4 [Bos taurus]                                                                 |             |         |       |            | gi 296486427 |                                  | 12558.8   |         | 9.3                     | 5      | 437         | 100    | 369 | 100 |
|    | Peptide Information                                                                            |             |         |       |            |              |                                  |           |         |                         |        |             |        |     |     |
|    | Calc. Mass                                                                                     | Obsrv. Mass | ± da    | ± ppm | Start Seq. | End Seq.     | Sequence                         | Ion Score | C. I. % | Modification            | Rank   | Result Type |        |     |     |
|    | 1391.6987                                                                                      | 1391.6581   | -0.0406 | -29   | 99         | 109          | ICLDQQNPLYK                      |           |         | Carbamidomethyl (C)[2]  |        | Mascot      |        |     |     |
|    | 1391.6987                                                                                      | 1391.6581   | -0.0406 | -29   | 99         | 109          | ICLDQQNPLYK                      | 64        | 99.657  | Carbamidomethyl (C)[2]  |        | Mascot      |        |     |     |
|    | 1519.7937                                                                                      | 1519.7506   | -0.0431 | -28   | 99         | 110          | ICLDQQNPLYKK                     |           |         | Carbamidomethyl (C)[2]  |        | Mascot      |        |     |     |
|    | 1519.7937                                                                                      | 1519.7506   | -0.0431 | -28   | 98         | 109          | ICLDQQNPLYK                      | 70        | 99.893  | Carbamidomethyl (C)[3]  |        | Mascot      |        |     |     |
|    | 2541.3857                                                                                      | 2541.3242   | -0.0615 | -24   | 71         | 94           | HISLSLEVIGAGLHCPSPQ<br>LIATLK    |           |         | Carbamidomethyl (C)[14] |        | Mascot      |        |     |     |
|    | 2541.3857                                                                                      | 2541.3242   | -0.0615 | -24   | 71         | 94           | HISLSLEVIGAGLHCPSPQ<br>LIATLK    | 124       | 100     | Carbamidomethyl (C)[14] |        | Mascot      |        |     |     |
|    | 2855.5559                                                                                      | 2855.4792   | -0.0767 | -27   | 71         | 97           | HISLSLEVIGAGLHCPSPQ<br>LIATLKTGR | 113       | 100     | Carbamidomethyl (C)[14] |        | Mascot      |        |     |     |
|    | 2855.5559                                                                                      | 2855.4792   | -0.0767 | -27   | 71         | 97           | HISLSLEVIGAGLHCPSPQ<br>LIATLKTGR |           |         | Carbamidomethyl (C)[14] |        | Mascot      |        |     |     |
| 4  | zinc finger protein 416 [Homo sapiens]                                                         |             |         |       |            | gi 33859678  |                                  | 67144.3   |         | 8.33                    | 8      | 65          | 74.706 |     |     |
|    | Peptide Information                                                                            |             |         |       |            |              |                                  |           |         |                         |        |             |        |     |     |
|    | Calc. Mass                                                                                     | Obsrv. Mass | ± da    | ± ppm | Start Seq. | End Seq.     | Sequence                         | Ion Score | C. I. % | Modification            | Rank   | Result Type |        |     |     |
|    | 882.4679                                                                                       | 882.5606    | 0.0927  | 105   | 240        | 246          | RLYESSK                          |           |         |                         |        | Mascot      |        |     |     |
|    | 882.4679                                                                                       | 882.5606    | 0.0927  | 105   | 240        | 246          | RLYESSK                          |           |         |                         |        | Mascot      |        |     |     |
|    | 996.5697                                                                                       | 996.5621    | -0.0076 | -8    | 367        | 374          | STLVRHQR                         |           |         |                         |        | Mascot      |        |     |     |
|    | 996.5697                                                                                       | 996.5621    | -0.0076 | -8    | 367        | 374          | STLVRHQR                         |           |         |                         |        | Mascot      |        |     |     |
|    | 1045.516                                                                                       | 1045.5453   | 0.0293  | 28    | 93         | 102          | TPAESPSTQK                       |           |         |                         |        | Mascot      |        |     |     |
|    | 1428.6615                                                                                      | 1428.7485   | 0.087   | 61    | 278        | 289          | SFSQTSHLNDHR                     |           |         |                         |        | Mascot      |        |     |     |
|    | 1519.6998                                                                                      | 1519.7506   | 0.0508  | 33    | 204        | 216          | CEEAFHVGISHYK                    |           |         |                         |        | Mascot      |        |     |     |
|    | 1519.6998                                                                                      | 1519.7506   | 0.0508  | 33    | 204        | 216          | CEEAFHVGISHYK                    |           |         |                         |        | Mascot      |        |     |     |
|    | 1647.7729                                                                                      | 1647.8484   | 0.0755  | 46    | 291        | 305          | IHTGERPYVCGQCGK                  |           |         |                         |        | Mascot      |        |     |     |
|    | 1647.7729                                                                                      | 1647.8484   | 0.0755  | 46    | 515        | 529          | IHTGLRPYDCGQCGK                  |           |         |                         |        | Mascot      |        |     |     |
|    | 2541.1794                                                                                      | 2541.3242   | 0.1448  | 57    | 423        | 445          | CGLIQHQLHSGARPFEC                |           |         |                         |        | Mascot      |        |     |     |
|    |                                                                                                | 2541.3242   |         |       |            |              | DECGK                            |           |         |                         |        | Mascot      |        |     |     |
|    | 2541.1794                                                                                      | 2541.3242   | 0.1448  | 57    | 423        | 445          | CGLIQHQLHSGARPFEC<br>DECGK       |           |         |                         |        | Mascot      |        |     |     |
| 5  | unnamed protein product [Homo sapiens]                                                         |             |         |       |            | gi 7020745   |                                  | 52894.5   |         | 7.88                    | 7      | 63          | 58.023 |     |     |
|    | Peptide Information                                                                            |             |         |       |            |              |                                  |           |         |                         |        |             |        |     |     |
|    | Calc. Mass                                                                                     | Obsrv. Mass | ± da    | ± ppm | Start Seq. | End Seq.     | Sequence                         | Ion Score | C. I. % | Modification            | Rank   | Result Type |        |     |     |
|    | 882.4679                                                                                       | 882.5606    | 0.0927  | 105   | 240        | 246          | RLYESSK                          |           |         |                         |        | Mascot      |        |     |     |
|    | 882.4679                                                                                       | 882.5606    | 0.0927  | 105   | 240        | 246          | RLYESSK                          |           |         |                         |        | Mascot      |        |     |     |
|    | 996.5697                                                                                       | 996.5621    | -0.0076 | -8    | 367        | 374          | STLVRHQR                         |           |         |                         |        | Mascot      |        |     |     |
|    | 996.5697                                                                                       | 996.5621    | -0.0076 | -8    | 367        | 374          | STLVRHQR                         |           |         |                         |        | Mascot      |        |     |     |
|    | 1045.516                                                                                       | 1045.5453   | 0.0293  | 28    | 93         | 102          | TPAESPSTQK                       |           |         |                         |        | Mascot      |        |     |     |
|    | 1428.6615                                                                                      | 1428.7485   | 0.087   | 61    | 278        | 289          | SFSQTSHLNDHR                     |           |         |                         |        | Mascot      |        |     |     |
|    | 1519.6998                                                                                      | 1519.7506   | 0.0508  | 33    | 204        | 216          | CEEAFHVGISHYK                    |           |         |                         |        | Mascot      |        |     |     |
|    | 1519.6998                                                                                      | 1519.7506   | 0.0508  | 33    | 204        | 216          | CEEAFHVGISHYK                    |           |         |                         |        | Mascot      |        |     |     |
|    | 1647.7729                                                                                      | 1647.8484   | 0.0755  | 46    | 291        | 305          | IHTGERPYVCGQCGK                  |           |         |                         |        | Mascot      |        |     |     |
|    | 1647.7729                                                                                      | 1647.8484   | 0.0755  | 46    | 291        | 305          | IHTGERPYVCGQCGK                  |           |         |                         |        | Mascot      |        |     |     |
|    | 2541.1794                                                                                      | 2541.3242   | 0.1448  | 57    | 423        | 445          | CGLIQHQLHSGARPFEC<br>DECGK       |           |         |                         |        | Mascot      |        |     |     |
|    | 2541.1794                                                                                      | 2541.3242   | 0.1448  | 57    | 423        | 445          | CGLIQHQLHSGARPFEC<br>DECGK       |           |         |                         |        | Mascot      |        |     |     |
| 6  | PREDICTED: protein kinase C and casein kinase substrate in neurons protein 3-like [Sus scrofa] |             |         |       |            | gi 311247889 |                                  | 48719.9   |         | 5.87                    | 2      | 55          | 0      | 29  | 0   |
|    | Peptide Information                                                                            |             |         |       |            |              |                                  |           |         |                         |        |             |        |     |     |
|    | Calc. Mass                                                                                     | Obsrv. Mass | ± da    | ± ppm | Start Seq. | End Seq.     | Sequence                         | Ion Score | C. I. % | Modification            | Rank   | Result Type |        |     |     |
|    | 1519.5931                                                                                      | 1519.7506   | 0.1575  | 104   | 349        | 360          | QDEEWSDEDNPR                     |           |         |                         |        | Mascot      |        |     |     |
|    | 1519.5931                                                                                      | 1519.7506   | 0.1575  | 104   | 349        | 360          | QDEEWSDEDNPR                     | 16        | 0       |                         |        | Mascot      |        |     |     |
|    | 1647.6881                                                                                      | 1647.8484   | 0.1603  | 97    | 349        | 361          | QDEEWSDEDNPRK                    | 29        | 0       |                         |        | Mascot      |        |     |     |
|    | 1647.6881                                                                                      | 1647.8484   | 0.1603  | 97    | 349        | 361          | QDEEWSDEDNPRK                    |           |         |                         |        | Mascot      |        |     |     |
| 7  | R27945_2 [Homo sapiens]                                                                        |             |         |       |            | gi 3264846   |                                  | 53897.1   |         | 9.03                    | 7      | 53          | 0      |     |     |
|    | Peptide Information                                                                            |             |         |       |            |              |                                  |           |         |                         |        |             |        |     |     |
|    | Calc. Mass                                                                                     | Obsrv. Mass | ± da    | ± ppm | Start Seq. | End Seq.     | Sequence                         | Ion Score | C. I. % | Modification            | Rank   | Result Type |        |     |     |
|    | 882.4679                                                                                       | 882.5606    | 0.0927  | 105   | 121        | 127          | RLYESSK                          |           |         |                         |        | Mascot      |        |     |     |
|    | 882.4679                                                                                       | 882.5606    | 0.0927  | 105   | 121        | 127          | RLYESSK                          |           |         |                         |        | Mascot      |        |     |     |
|    | 996.5697                                                                                       | 996.5621    | -0.0076 | -8    | 248        | 255          | STLVRHQR                         |           |         |                         |        | Mascot      |        |     |     |
|    | 996.5697                                                                                       | 996.5621    | -0.0076 | -8    | 248        | 255          | STLVRHQR                         |           |         |                         |        | Mascot      |        |     |     |
|    | 1428.6615                                                                                      | 1428.7485   | 0.087   | 61    | 159        | 170          | SFSQTSHLNDHR                     |           |         |                         |        | Mascot      |        |     |     |
|    | 1519.6998                                                                                      | 1519.7506   | 0.0508  | 33    | 85         | 97           | CEEAFHVGISHYK                    |           |         |                         |        | Mascot      |        |     |     |
|    | 1519.6998                                                                                      | 1519.7506   | 0.0508  | 33    | 85         | 97           | CEEAFHVGISHYK                    |           |         |                         |        | Mascot      |        |     |     |
|    | 1647.7729                                                                                      | 1647.8484   | 0.0755  | 46    | 172        | 186          | IHTGERPYVCGQCGK                  |           |         |                         |        | Mascot      |        |     |     |
|    | 1647.7729                                                                                      | 1647.8484   | 0.0755  | 46    | 396        | 410          | IHTGLRPYDCGQCGK                  |           |         |                         |        | Mascot      |        |     |     |
|    | 2541.1794                                                                                      | 2541.3242   | 0.1448  | 57    | 304        | 326          | CGLIQHQLHSGARPFEC<br>DECGK       |           |         |                         |        | Mascot      |        |     |     |
|    | 2541.1794                                                                                      | 2541.3242   | 0.1448  | 57    | 304        | 326          | CGLIQHQLHSGARPFEC<br>DECGK       |           |         |                         |        | Mascot      |        |     |     |
| 8  | PREDICTED: putative transposase element L1Md-A101/L1Md-A102/L1Md-A2-like [Mus musculus]        |             |         |       |            | gi 309269461 |                                  | 44521.3   |         | 9.39                    | 6      | 51          | 0      |     |     |
|    | Peptide Information                                                                            |             |         |       |            |              |                                  |           |         |                         |        |             |        |     |     |
|    | Calc. Mass                                                                                     | Obsrv. Mass | ± da    | ± ppm | Start Seq. | End Seq.     | Sequence                         | Ion Score | C. I. % | Modification            | Rank   | Result Type |        |     |     |
|    | 1391.6255                                                                                      | 1391.6581   | 0.0326  | 23    | 74         | 84           | AYLMMVVEDIK                      |           |         | Oxidation (M)[4,5,6]    |        | Mascot      |        |     |     |
|    | 1391.6255                                                                                      | 1391.6581   | 0.0326  | 23    | 74         | 84           | AYLMMVVEDIK                      |           |         | Oxidation (M)[4,5,6]    |        | Mascot      |        |     |     |
|    | 1519.7205                                                                                      | 1519.7506   | 0.0301  | 20    | 74         | 85           | AYLMMVVEDIKK                     |           |         | Oxidation (M)[4,5,6]    |        | Mascot      |        |     |     |
|    | 1519.7638                                                                                      | 1519.7506   | -0.0132 | -9    | 211        | 223          | IGVDENEDFOLK                     |           |         |                         |        | Mascot      |        |     |     |
|    | 1647.8435                                                                                      | 1647.8484   | 0.0049  | 3     | 169        | 184          | ISGAEDSIENIGTTIK                 |           |         |                         |        | Mascot      |        |     |     |
|    | 1647.88                                                                                        | 1647.8484   | -0.0316 | -19   | 136        | 150          | TQSEATLEIETLQKK                  | 4         | 0       |                         |        | Mascot      |        |     |     |
|    | 2984.4414                                                                                      | 2984.574    | 0.1326  | 44    | 1          | 26           | MMPILLSPNVLNWMTE<br>STITNSR      |           |         | Oxidation (M)[1,2,16]   |        | Mascot      |        |     |     |
| 9  | ras-related protein Rab-37 [Bos taurus]                                                        |             |         |       |            | gi 300794443 |                                  | 24278.3   |         | 6.22                    | 5      | 51          | 0      |     |     |
|    | Peptide Information                                                                            |             |         |       |            |              |                                  |           |         |                         |        |             |        |     |     |
|    | Calc. Mass                                                                                     | Obsrv. Mass | ± da    | ± ppm | Start Seq. | End Seq.     | Sequence                         | Ion Score | C. I. % | Modification            | Rank   | Result Type |        |     |     |
|    | 996.4897                                                                                       | 996.5621    | 0.0724  | 73    | 87         | 94           | SVTHAYYR                         |           |         |                         |        | Mascot      |        |     |     |
|    | 996.4996                                                                                       | 996.5621    | 0.0625  | 63    | 201        | 208          | DYVESQKK                         |           |         |                         |        | Mascot      |        |     |     |
|    | 1045.5887                                                                                      | 1045.5453   | -0.0434 | -42   | 25         | 35           | TLVGDGQVGK                       |           |         |                         |        | Mascot      |        |     |     |
|    | 1391.6947                                                                                      | 1391.6581   | -0.0366 | -26   | 145        | 156          | VIRESDEGMRLAR                    |           |         | Oxidation (M)[9]        |        | Mascot      |        |     |     |
|    | 1391.6947                                                                                      | 1391.6581   | -0.0366 | -26   | 145        | 156          | VIRESDEGMRLAR                    |           |         | Oxidation (M)[9]        |        | Mascot      |        |     |     |
|    | 2599.3701                                                                                      | 2599.4841   | 0.114   | 44    | 116        | 137          | AWLTIHEYAQRDVVIML<br>LGNK        |           |         |                         |        | Mascot      |        |     |     |
| 10 | PREDICTED: folate receptor gamma-like [Callithrix jacchus]                                     |             |         |       |            | gi 296217152 |                                  | 27959.1   |         | 8.31                    | 6      | 49          | 0      |     |     |
|    | Peptide Information                                                                            |             |         |       |            |              |                                  |           |         |                         |        |             |        |     |     |
|    | Calc. Mass                                                                                     | Obsrv. Mass | ± da    | ± ppm | Start Seq. | End Seq.     | Sequence                         | Ion Score | C. I. % | Modification            | Rank   | Result Type |        |     |     |
|    | 1045.5537                                                                                      | 1045.5453   | -0.0084 | -8    | 119        | 126          | QVNSWRK                          |           |         |                         |        | Mascot      |        |     |     |
|    | 1391.7134                                                                                      | 1391.6581   | -0.0553 | -40   | 29         | 41           | ARTGLNVCMDAK                     |           |         |                         |        | Mascot      |        |     |     |
|    | 1391.7134                                                                                      | 1391.6581   | -0.0553 | -40   | 29         | 41           | ARTGLNVCMDAK                     |           |         |                         |        | Mascot      |        |     |     |
|    | 1428.694                                                                                       | 1428.7485   | 0.0545  | 38    | 228        | 240          | FYAAAMKAEPSR                     |           |         | Oxidation (M)[6]        |        | Mascot      |        |     |     |
|    | 1519.6628                                                                                      | 1519.7506   | 0.0878  | 58    | 63         | 76           | NACCTANTSQELHK                   |           |         |                         |        | Mascot      |        |     |     |

|                  |           |        |    |     |     |                   |        |
|------------------|-----------|--------|----|-----|-----|-------------------|--------|
| 1519.6628        | 1519.7506 | 0.0878 | 58 | 63  | 76  | NACCTANTSQELHK    | Mascot |
| 1647.7577        | 1647.8484 | 0.0907 | 55 | 62  | 76  | KNACCTANTSQELHK   | Mascot |
| 1647.7577        | 1647.8484 | 0.0907 | 55 | 62  | 76  | KNACCTANTSQELHK   | Mascot |
| 2210.9592        | 2211.0488 | 0.0896 | 41 | 209 | 227 | CICMWFDSAGGNPNEEV | Mascot |
| AR               |           |        |    |     |     |                   |        |
| Oxidation (M)[4] |           |        |    |     |     |                   |        |

|                |              |                        |                |            |                |                    |         |           |           |
|----------------|--------------|------------------------|----------------|------------|----------------|--------------------|---------|-----------|-----------|
| Gel Idx/Pos    | 33/B13       | Instr./Gel Origin      | AB4700/110211A |            | Process Status | Analysis Succeeded |         |           |           |
| Plate [#] Name | [1] 8907     | Instrument Sample Name |                |            | Spectra        | 8                  |         |           |           |
| Rank           | Protein Name | Species                | Accession No.  | Protein MW | Protein        | Pep.               | Protein | Total Ion | Total Ion |

|   |                                                                                              |  |             |         |      |    |     |     |     |     |
|---|----------------------------------------------------------------------------------------------|--|-------------|---------|------|----|-----|-----|-----|-----|
| 1 | Transglutaminase 2 (C polypeptide, protein-glutamine-gamma-glutamyltransferase) [Bos taurus] |  | gi 73586866 | 77077.4 | 5.14 | 15 | 439 | 100 | 333 | 100 |
|---|----------------------------------------------------------------------------------------------|--|-------------|---------|------|----|-----|-----|-----|-----|

| Peptide Information |             |         |       |            |          |                             |           |         |                          | Rank | Result Type |
|---------------------|-------------|---------|-------|------------|----------|-----------------------------|-----------|---------|--------------------------|------|-------------|
| Calc. Mass          | Obsrv. Mass | ± da    | ± ppm | Start Seq. | End Seq. | Sequence                    | Ion Score | C. I. % | Modification             |      |             |
| 1020.5584           | 1020.5179   | -0.0405 | -40   | 214        | 222      | RSSPYVYVGR                  |           |         |                          |      | Mascot      |
| 1045.5789           | 1045.5284   | -0.0505 | -48   | 678        | 687      | GFRNVIVGPS                  |           |         |                          |      | Mascot      |
| 1078.5527           | 1078.437    | -0.1157 | -107  | 664        | 672      | LVNFEEDR                    |           |         |                          |      | Mascot      |
| 1144.6725           | 1144.6334   | -0.0391 | -34   | 652        | 661      | VDLLPLYVGR                  | 47        | 91.67   |                          |      | Mascot      |
| 1144.6725           | 1144.6334   | -0.0391 | -34   | 652        | 661      | VDLLPLYVGR                  |           |         |                          |      | Mascot      |
| 1150.6891           | 1150.5365   | -0.1325 | -115  | 459        | 468      | ANRLKLVNKK                  |           |         |                          |      | Mascot      |
| 1319.7317           | 1319.689    | -0.0427 | -32   | 664        | 674      | LVNFEEDRLK                  |           |         |                          |      | Mascot      |
| 1399.8419           | 1399.7887   | -0.0532 | -38   | 650        | 661      | VRVDLLPLYVGR                |           |         |                          |      | Mascot      |
| 1481.6511           | 1481.6057   | -0.0454 | -31   | 365        | 377      | SEGTYCCGPVPVR               | 45        | 86.46   | Carbamidomethyl (C)[6,7] |      | Mascot      |
| 1481.6511           | 1481.6057   | -0.0454 | -31   | 365        | 377      | SEGTYCCGPVPVR               |           |         | Carbamidomethyl (C)[6,7] |      | Mascot      |
| 1587.8066           | 1587.7638   | -0.0428 | -27   | 36         | 48       | GQPFWLTLHFEGR               |           |         |                          |      | Mascot      |
| 1587.8066           | 1587.7638   | -0.0428 | -27   | 36         | 48       | GQPFWLTLHFEGR               | 51        | 96.646  |                          |      | Mascot      |
| 1729.9482           | 1729.8912   | -0.057  | -33   | 565        | 580      | GLLIEPAANSYLLAER            |           |         |                          |      | Mascot      |
| 1743.9077           | 1743.8541   | -0.0536 | -31   | 35         | 48       | RGQPFWLTLHFEGR              |           |         |                          |      | Mascot      |
| 1932.9265           | 1932.8702   | -0.0563 | -29   | 223        | 240      | VVSGMVNCNDDGVLLG R          |           |         | Carbamidomethyl (C)[8]   |      | Mascot      |
| 1932.9265           | 1932.8702   | -0.0563 | -29   | 223        | 240      | VVSGMVNCNDDGVLLG R          | 50        | 95.229  | Carbamidomethyl (C)[8]   |      | Mascot      |
| 2390.0466           | 2389.9695   | -0.0771 | -32   | 486        | 506      | GCDFDVFAHITNSTPEEH TGR      | 69        | 99.941  | Carbamidomethyl (C)[2]   |      | Mascot      |
| 2390.0466           | 2389.9695   | -0.0771 | -32   | 486        | 506      | GCDFDVFAHITNSTPEEH TGR      |           |         | Carbamidomethyl (C)[2]   |      | Mascot      |
| 2497.2107           | 2497.1235   | -0.0872 | -35   | 297        | 317      | VVTNYSNAHDQNSNLLIE YFR      | 57        | 99.087  |                          |      | Mascot      |
| 2497.2107           | 2497.1235   | -0.0872 | -35   | 297        | 317      | VVTNYSNAHDQNSNLLIE YFR      |           |         |                          |      | Mascot      |
| 2944.5667           | 2944.4646   | -0.1021 | -35   | 565        | 590      | GLLIEPAANSYLLAERDIY LENPEIK | 14        | 0       |                          |      | Mascot      |
| 2944.5667           | 2944.4646   | -0.1021 | -35   | 565        | 590      | GLLIEPAANSYLLAERDIY LENPEIK |           |         |                          |      | Mascot      |

|   |                                                                        |  |             |         |      |   |     |     |     |     |
|---|------------------------------------------------------------------------|--|-------------|---------|------|---|-----|-----|-----|-----|
| 2 | protein-glutamine gamma-glutamyltransferase 2 isoform b [Homo sapiens] |  | gi 39777599 | 61639.1 | 5.05 | 8 | 243 | 100 | 201 | 100 |
|---|------------------------------------------------------------------------|--|-------------|---------|------|---|-----|-----|-----|-----|

| Peptide Information |             |         |       |            |          |                         |           |         |                          | Rank | Result Type |
|---------------------|-------------|---------|-------|------------|----------|-------------------------|-----------|---------|--------------------------|------|-------------|
| Calc. Mass          | Obsrv. Mass | ± da    | ± ppm | Start Seq. | End Seq. | Sequence                | Ion Score | C. I. % | Modification             |      |             |
| 996.4277            | 996.543     | 0.1153  | 116   | 541        | 548      | ALCSWSIC                |           |         | Carbamidomethyl (C)[3,8] |      | Mascot      |
| 1020.5584           | 1020.5179   | -0.0405 | -40   | 214        | 222      | RSSPYVYVGR              |           |         |                          |      | Mascot      |
| 1481.6511           | 1481.6057   | -0.0454 | -31   | 365        | 377      | SEGTYCCGPVPVR           | 45        | 86.46   | Carbamidomethyl (C)[6,7] |      | Mascot      |
| 1481.6511           | 1481.6057   | -0.0454 | -31   | 365        | 377      | SEGTYCCGPVPVR           |           |         | Carbamidomethyl (C)[6,7] |      | Mascot      |
| 1587.8066           | 1587.7638   | -0.0428 | -27   | 36         | 48       | GQPFWLTLHFEGR           |           |         |                          |      | Mascot      |
| 1587.8066           | 1587.7638   | -0.0428 | -27   | 36         | 48       | GQPFWLTLHFEGR           | 51        | 96.646  |                          |      | Mascot      |
| 1743.9077           | 1743.8541   | -0.0536 | -31   | 35         | 48       | RGQPFWLTLHFEGR          |           |         |                          |      | Mascot      |
| 1932.9265           | 1932.8702   | -0.0563 | -29   | 223        | 240      | VVSGMVNCNDDGVLLG R      |           |         | Carbamidomethyl (C)[8]   |      | Mascot      |
| 1932.9265           | 1932.8702   | -0.0563 | -29   | 223        | 240      | VVSGMVNCNDDGVLLG R      | 50        | 95.229  | Carbamidomethyl (C)[8]   |      | Mascot      |
| 2497.1453           | 2497.1235   | -0.0218 | -9    | 241        | 262      | WDNNYGDGVSPMSWIG SVDILR |           |         | Oxidation (M)[12]        |      | Mascot      |
| 2497.2107           | 2497.1235   | -0.0872 | -35   | 297        | 317      | VVTNYSNAHDQNSNLLIE YFR  | 57        | 99.087  |                          |      | Mascot      |

|   |                                                                           |  |              |       |      |   |     |     |     |     |
|---|---------------------------------------------------------------------------|--|--------------|-------|------|---|-----|-----|-----|-----|
| 3 | PREDICTED: protein-glutamine gamma-glutamyltransferase 2 [Macaca mulatta] |  | gi 297259843 | 61524 | 5.08 | 8 | 241 | 100 | 200 | 100 |
|---|---------------------------------------------------------------------------|--|--------------|-------|------|---|-----|-----|-----|-----|

| Peptide Information |             |         |       |            |          |                         |           |         |                          | Rank | Result Type |
|---------------------|-------------|---------|-------|------------|----------|-------------------------|-----------|---------|--------------------------|------|-------------|
| Calc. Mass          | Obsrv. Mass | ± da    | ± ppm | Start Seq. | End Seq. | Sequence                | Ion Score | C. I. % | Modification             |      |             |
| 1020.5584           | 1020.5179   | -0.0405 | -40   | 214        | 222      | RSSPYVYVGR              |           |         |                          |      | Mascot      |
| 1187.7106           | 1187.6394   | -0.0712 | -60   | 415        | 425      | SINRSLTVGLK             |           |         |                          |      | Mascot      |
| 1481.6511           | 1481.6057   | -0.0454 | -31   | 365        | 377      | SEGTYCCGPVPVR           | 45        | 86.46   | Carbamidomethyl (C)[6,7] |      | Mascot      |
| 1481.6511           | 1481.6057   | -0.0454 | -31   | 365        | 377      | SEGTYCCGPVPVR           |           |         | Carbamidomethyl (C)[6,7] |      | Mascot      |
| 1587.8066           | 1587.7638   | -0.0428 | -27   | 36         | 48       | GQPFWLTLHFEGR           |           |         |                          |      | Mascot      |
| 1587.8066           | 1587.7638   | -0.0428 | -27   | 36         | 48       | GQPFWLTLHFEGR           | 51        | 96.646  |                          |      | Mascot      |
| 1743.9077           | 1743.8541   | -0.0536 | -31   | 35         | 48       | RGQPFWLTLHFEGR          |           |         |                          |      | Mascot      |
| 1932.9265           | 1932.8702   | -0.0563 | -29   | 223        | 240      | VVSGMVNCNDDGVLLG R      |           |         | Carbamidomethyl (C)[8]   |      | Mascot      |
| 1932.9265           | 1932.8702   | -0.0563 | -29   | 223        | 240      | VVSGMVNCNDDGVLLG R      | 50        | 95.229  | Carbamidomethyl (C)[8]   |      | Mascot      |
| 2497.1453           | 2497.1235   | -0.0218 | -9    | 241        | 262      | WDNNYGDGVSPMSWIG SVDILR |           |         | Oxidation (M)[12]        |      | Mascot      |
| 2497.2107           | 2497.1235   | -0.0872 | -35   | 297        | 317      | VVTNYSNAHDQNSNLLIE YFR  | 57        | 99.087  |                          |      | Mascot      |

|   |                                        |  |              |         |      |   |     |     |     |     |
|---|----------------------------------------|--|--------------|---------|------|---|-----|-----|-----|-----|
| 4 | unnamed protein product [Homo sapiens] |  | gi 194381290 | 68605.4 | 5.19 | 7 | 231 | 100 | 201 | 100 |
|---|----------------------------------------|--|--------------|---------|------|---|-----|-----|-----|-----|

| Peptide Information |             |         |       |            |          |                         |           |         |                          | Rank | Result Type |
|---------------------|-------------|---------|-------|------------|----------|-------------------------|-----------|---------|--------------------------|------|-------------|
| Calc. Mass          | Obsrv. Mass | ± da    | ± ppm | Start Seq. | End Seq. | Sequence                | Ion Score | C. I. % | Modification             |      |             |
| 1020.5584           | 1020.5179   | -0.0405 | -40   | 133        | 141      | RSSPYVYVGR              |           |         |                          |      | Mascot      |
| 1481.6511           | 1481.6057   | -0.0454 | -31   | 284        | 296      | SEGTYCCGPVPVR           | 45        | 86.46   | Carbamidomethyl (C)[6,7] |      | Mascot      |
| 1481.6511           | 1481.6057   | -0.0454 | -31   | 284        | 296      | SEGTYCCGPVPVR           |           |         | Carbamidomethyl (C)[6,7] |      | Mascot      |
| 1587.8066           | 1587.7638   | -0.0428 | -27   | 36         | 48       | GQPFWLTLHFEGR           |           |         |                          |      | Mascot      |
| 1587.8066           | 1587.7638   | -0.0428 | -27   | 36         | 48       | GQPFWLTLHFEGR           | 51        | 96.646  |                          |      | Mascot      |
| 1743.9077           | 1743.8541   | -0.0536 | -31   | 35         | 48       | RGQPFWLTLHFEGR          |           |         |                          |      | Mascot      |
| 1932.9265           | 1932.8702   | -0.0563 | -29   | 142        | 159      | VVSGMVNCNDDGVLLG R      |           |         | Carbamidomethyl (C)[8]   |      | Mascot      |
| 1932.9265           | 1932.8702   | -0.0563 | -29   | 142        | 159      | VVSGMVNCNDDGVLLG R      | 50        | 95.229  | Carbamidomethyl (C)[8]   |      | Mascot      |
| 2497.1453           | 2497.1235   | -0.0218 | -9    | 160        | 181      | WDNNYGDGVSPMSWIG SVDILR |           |         | Oxidation (M)[12]        |      | Mascot      |
| 2497.2107           | 2497.1235   | -0.0872 | -35   | 216        | 236      | VVTNYSNAHDQNSNLLIE YFR  | 57        | 99.087  |                          |      | Mascot      |

|   |                                                                        |  |             |         |      |   |     |     |     |     |
|---|------------------------------------------------------------------------|--|-------------|---------|------|---|-----|-----|-----|-----|
| 5 | protein-glutamine gamma-glutamyltransferase 2 isoform a [Homo sapiens] |  | gi 39777597 | 77279.7 | 5.11 | 7 | 229 | 100 | 201 | 100 |
|---|------------------------------------------------------------------------|--|-------------|---------|------|---|-----|-----|-----|-----|

| Peptide Information |             |         |       |            |          |                    |           |         |                          | Rank | Result Type |
|---------------------|-------------|---------|-------|------------|----------|--------------------|-----------|---------|--------------------------|------|-------------|
| Calc. Mass          | Obsrv. Mass | ± da    | ± ppm | Start Seq. | End Seq. | Sequence           | Ion Score | C. I. % | Modification             |      |             |
| 1020.5584           | 1020.5179   | -0.0405 | -40   | 214        | 222      | RSSPYVYVGR         |           |         |                          |      | Mascot      |
| 1481.6511           | 1481.6057   | -0.0454 | -31   | 365        | 377      | SEGTYCCGPVPVR      | 45        | 86.46   | Carbamidomethyl (C)[6,7] |      | Mascot      |
| 1481.6511           | 1481.6057   | -0.0454 | -31   | 365        | 377      | SEGTYCCGPVPVR      |           |         | Carbamidomethyl (C)[6,7] |      | Mascot      |
| 1587.8066           | 1587.7638   | -0.0428 | -27   | 36         | 48       | GQPFWLTLHFEGR      |           |         |                          |      | Mascot      |
| 1587.8066           | 1587.7638   | -0.0428 | -27   | 36         | 48       | GQPFWLTLHFEGR      | 51        | 96.646  |                          |      | Mascot      |
| 1743.9077           | 1743.8541   | -0.0536 | -31   | 35         | 48       | RGQPFWLTLHFEGR     |           |         |                          |      | Mascot      |
| 1932.9265           | 1932.8702   | -0.0563 | -29   | 223        | 240      | VVSGMVNCNDDGVLLG R |           |         | Carbamidomethyl (C)[8]   |      | Mascot      |

|           |           |         |     |     |     |                          |    |        |                        |        |
|-----------|-----------|---------|-----|-----|-----|--------------------------|----|--------|------------------------|--------|
| 1932.9265 | 1932.8702 | -0.0563 | -29 | 223 | 240 | VVSGMVNCNDDQGVLLG<br>R   | 50 | 95.229 | Carbamidomethyl (C)[8] | Mascot |
| 2497.1453 | 2497.1235 | -0.0218 | -9  | 241 | 262 | WDNNYGDGVSPMSWIG         |    |        | Oxidation (M)[12]      | Mascot |
| 2497.1235 |           |         |     |     |     | SVDILR                   |    |        |                        | Mascot |
| 2497.2107 | 2497.1235 | -0.0872 | -35 | 297 | 317 | VVTNYSNADQNSNLLIE<br>YFR | 57 | 99.087 |                        | Mascot |

6 PREDICTED: protein-glutamine gamma-glutamyltransferase 2-like isoform 2 [Pongo abelii] gi|297707059 68568.4 5.18 5 220 100 203 100

| Peptide Information |             |         |       |            |          |                          |           |         |                          | Rank   | Result Type |
|---------------------|-------------|---------|-------|------------|----------|--------------------------|-----------|---------|--------------------------|--------|-------------|
| Calc. Mass          | Obsrv. Mass | ± da    | ± ppm | Start Seq. | End Seq. | Sequence                 | Ion Score | C. I. % | Modification             |        |             |
| 1481.6511           | 1481.6057   | -0.0454 | -31   | 284        | 296      | SEGTCCGPVPVR             | 45        | 86.46   | Carbamidomethyl (C)[6,7] | Mascot |             |
| 1481.6511           | 1481.6057   | -0.0454 | -31   | 284        | 296      | SEGTCCGPVPVR             |           |         | Carbamidomethyl (C)[6,7] | Mascot |             |
| 1587.8066           | 1587.7638   | -0.0428 | -27   | 36         | 48       | GQPFWLTLLHFEGR           | 51        | 96.646  |                          | Mascot |             |
| 1587.8066           | 1587.7638   | -0.0428 | -27   | 36         | 48       | GQPFWLTLLHFEGR           |           |         |                          | Mascot |             |
| 1743.9077           | 1743.8541   | -0.0536 | -31   | 35         | 48       | RGQPFWLTLLHFEGR          |           |         |                          | Mascot |             |
| 1932.9265           | 1932.8702   | -0.0563 | -29   | 142        | 159      | VVSGMVNCNDDQGVLLG<br>R   |           |         | Carbamidomethyl (C)[8]   | Mascot |             |
| 1932.9265           | 1932.8702   | -0.0563 | -29   | 142        | 159      | VVSGMVNCNDDQGVLLG<br>R   | 50        | 95.229  | Carbamidomethyl (C)[8]   | Mascot |             |
| 2497.2107           | 2497.1235   | -0.0872 | -35   | 216        | 236      | VVTNYSNADQNSNLLIE<br>YFR | 57        | 99.087  |                          | Mascot |             |
| 2497.2107           | 2497.1235   | -0.0872 | -35   | 216        | 236      | VVTNYSNADQNSNLLIE<br>YFR |           |         |                          | Mascot |             |

7 PREDICTED: protein-glutamine gamma-glutamyltransferase 2-like isoform 1 [Pongo abelii] gi|297707057 77259.6 5.07 5 219 100 203 100

| Peptide Information |             |         |       |            |          |                          |           |         |                          | Rank   | Result Type |
|---------------------|-------------|---------|-------|------------|----------|--------------------------|-----------|---------|--------------------------|--------|-------------|
| Calc. Mass          | Obsrv. Mass | ± da    | ± ppm | Start Seq. | End Seq. | Sequence                 | Ion Score | C. I. % | Modification             |        |             |
| 1481.6511           | 1481.6057   | -0.0454 | -31   | 365        | 377      | SEGTCCGPVPVR             | 45        | 86.46   | Carbamidomethyl (C)[6,7] | Mascot |             |
| 1481.6511           | 1481.6057   | -0.0454 | -31   | 365        | 377      | SEGTCCGPVPVR             |           |         | Carbamidomethyl (C)[6,7] | Mascot |             |
| 1587.8066           | 1587.7638   | -0.0428 | -27   | 36         | 48       | GQPFWLTLLHFEGR           | 51        | 96.646  |                          | Mascot |             |
| 1587.8066           | 1587.7638   | -0.0428 | -27   | 36         | 48       | GQPFWLTLLHFEGR           |           |         |                          | Mascot |             |
| 1743.9077           | 1743.8541   | -0.0536 | -31   | 35         | 48       | RGQPFWLTLLHFEGR          |           |         |                          | Mascot |             |
| 1932.9265           | 1932.8702   | -0.0563 | -29   | 223        | 240      | VVSGMVNCNDDQGVLLG<br>R   |           |         | Carbamidomethyl (C)[8]   | Mascot |             |
| 1932.9265           | 1932.8702   | -0.0563 | -29   | 223        | 240      | VVSGMVNCNDDQGVLLG<br>R   | 50        | 95.229  | Carbamidomethyl (C)[8]   | Mascot |             |
| 2497.2107           | 2497.1235   | -0.0872 | -35   | 297        | 317      | VVTNYSNADQNSNLLIE<br>YFR | 57        | 99.087  |                          | Mascot |             |
| 2497.2107           | 2497.1235   | -0.0872 | -35   | 297        | 317      | VVTNYSNADQNSNLLIE<br>YFR |           |         |                          | Mascot |             |

8 PREDICTED: protein-glutamine gamma-glutamyltransferase 2 [Sus scrofa] gi|311274845 78223.1 5.23 8 200 100 164 100

| Peptide Information |             |         |       |            |          |                                |           |         |                          | Rank   | Result Type |
|---------------------|-------------|---------|-------|------------|----------|--------------------------------|-----------|---------|--------------------------|--------|-------------|
| Calc. Mass          | Obsrv. Mass | ± da    | ± ppm | Start Seq. | End Seq. | Sequence                       | Ion Score | C. I. % | Modification             |        |             |
| 1020.5584           | 1020.5179   | -0.0405 | -40   | 223        | 231      | RSSPYVYVGR                     |           |         |                          | Mascot |             |
| 1045.5789           | 1045.5284   | -0.0505 | -48   | 687        | 696      | GFRNVIVGPS                     |           |         |                          | Mascot |             |
| 1144.73             | 1144.6334   | -0.0966 | -84   | 428        | 438      | SLVGLKISTK                     |           |         |                          | Mascot |             |
| 1144.73             | 1144.6334   | -0.0966 | -84   | 428        | 438      | SLVGLKISTK                     |           |         |                          | Mascot |             |
| 1481.6511           | 1481.6057   | -0.0454 | -31   | 374        | 386      | SEGTCCGPVPVR                   | 45        | 86.46   | Carbamidomethyl (C)[6,7] | Mascot |             |
| 1481.6511           | 1481.6057   | -0.0454 | -31   | 374        | 386      | SEGTCCGPVPVR                   |           |         | Carbamidomethyl (C)[6,7] | Mascot |             |
| 1729.9482           | 1729.8912   | -0.057  | -33   | 574        | 589      | GLLIEPAANSYLLAER               |           |         |                          | Mascot |             |
| 1932.9265           | 1932.8702   | -0.0563 | -29   | 232        | 249      | VVSGMVNCNDDQGVLLG<br>R         |           |         | Carbamidomethyl (C)[8]   | Mascot |             |
| 1932.9265           | 1932.8702   | -0.0563 | -29   | 232        | 249      | VVSGMVNCNDDQGVLLG<br>R         | 50        | 95.229  | Carbamidomethyl (C)[8]   | Mascot |             |
| 2497.2107           | 2497.1235   | -0.0872 | -35   | 306        | 326      | VVTNYSNADQNSNLLIE<br>YFR       | 57        | 99.087  |                          | Mascot |             |
| 2497.2107           | 2497.1235   | -0.0872 | -35   | 306        | 326      | VVTNYSNADQNSNLLIE<br>YFR       |           |         |                          | Mascot |             |
| 2944.5667           | 2944.4646   | -0.1021 | -35   | 574        | 599      | GLLIEPAANSYLLAERDIY<br>LENPEIK | 14        | 0       |                          | Mascot |             |
| 2944.5667           | 2944.4646   | -0.1021 | -35   | 574        | 599      | GLLIEPAANSYLLAERDIY<br>LENPEIK |           |         |                          | Mascot |             |

9 PREDICTED: transglutaminase 2 isoform 1 [Pan troglodytes] gi|114681978 62095.4 5.31 7 189 100 156 100

| Peptide Information |             |         |       |            |          |                            |           |         |                          | Rank   | Result Type |
|---------------------|-------------|---------|-------|------------|----------|----------------------------|-----------|---------|--------------------------|--------|-------------|
| Calc. Mass          | Obsrv. Mass | ± da    | ± ppm | Start Seq. | End Seq. | Sequence                   | Ion Score | C. I. % | Modification             |        |             |
| 996.4277            | 996.543     | 0.1153  | 116   | 545        | 552      | ALCSWSIC                   |           |         | Carbamidomethyl (C)[3,8] | Mascot |             |
| 1020.5584           | 1020.5179   | -0.0405 | -40   | 218        | 226      | RSSPYVYVGR                 |           |         |                          | Mascot |             |
| 1587.8066           | 1587.7638   | -0.0428 | -27   | 36         | 48       | GQPFWLTLLHFEGR             | 51        | 96.646  |                          | Mascot |             |
| 1587.8066           | 1587.7638   | -0.0428 | -27   | 36         | 48       | GQPFWLTLLHFEGR             |           |         |                          | Mascot |             |
| 1743.9077           | 1743.8541   | -0.0536 | -31   | 35         | 48       | RGQPFWLTLLHFEGR            |           |         |                          | Mascot |             |
| 1932.9265           | 1932.8702   | -0.0563 | -29   | 227        | 244      | VVSGMVNCNDDQGVLLG<br>R     |           |         | Carbamidomethyl (C)[8]   | Mascot |             |
| 1932.9265           | 1932.8702   | -0.0563 | -29   | 227        | 244      | VVSGMVNCNDDQGVLLG<br>R     | 50        | 95.229  | Carbamidomethyl (C)[8]   | Mascot |             |
| 2497.1453           | 2497.1235   | -0.0218 | -9    | 245        | 266      | WDNNYGDGVSPMSWIG<br>SVDILR |           |         | Oxidation (M)[12]        | Mascot |             |
| 2497.2107           | 2497.1235   | -0.0872 | -35   | 301        | 321      | VVTNYSNADQNSNLLIE<br>YFR   | 57        | 99.087  |                          | Mascot |             |

10 Chain A, Human Tissue Transglutaminase In Gdp Bound Form gi|20151073 77208.6 5.17 8 186 100 152 100

| Peptide Information |             |         |       |            |          |                            |           |         |                          | Rank   | Result Type |
|---------------------|-------------|---------|-------|------------|----------|----------------------------|-----------|---------|--------------------------|--------|-------------|
| Calc. Mass          | Obsrv. Mass | ± da    | ± ppm | Start Seq. | End Seq. | Sequence                   | Ion Score | C. I. % | Modification             |        |             |
| 1020.5584           | 1020.5179   | -0.0405 | -40   | 214        | 222      | RSSPYVYVGR                 |           |         |                          | Mascot |             |
| 1481.6511           | 1481.6057   | -0.0454 | -31   | 365        | 377      | SEGTCCGPVPVR               | 45        | 90.116  | Carbamidomethyl (C)[6,7] | Mascot |             |
| 1481.6511           | 1481.6057   | -0.0454 | -31   | 365        | 377      | SEGTCCGPVPVR               |           |         | Carbamidomethyl (C)[6,7] | Mascot |             |
| 1566.8413           | 1566.7312   | -0.1101 | -70   | 538        | 540      | YLLNLTEPFSEK               |           |         |                          | Mascot |             |
| 1587.8066           | 1587.7638   | -0.0428 | -27   | 36         | 48       | GQPFWLTLLHFEGR             |           |         |                          | Mascot |             |
| 1587.8066           | 1587.7638   | -0.0428 | -27   | 36         | 48       | GQPFWLTLLHFEGR             | 51        | 97.551  |                          | Mascot |             |
| 1743.9077           | 1743.8541   | -0.0536 | -31   | 35         | 48       | RGQPFWLTLLHFEGR            |           |         |                          | Mascot |             |
| 1833.8582           | 1833.8585   | 0.0003  | 0     | 223        | 240      | VSGMVNCNDDQGVLL<br>GR      |           |         |                          | Mascot |             |
| 2497.1453           | 2497.1235   | -0.0218 | -9    | 241        | 262      | WDNNYGDGVSPMSWIG<br>SVDILR |           |         | Oxidation (M)[12]        | Mascot |             |
| 2497.2107           | 2497.1235   | -0.0872 | -35   | 297        | 317      | VVTNYSNADQNSNLLIE<br>YFR   | 57        | 99.333  |                          | Mascot |             |

|                |          |                        |                |                |                    |
|----------------|----------|------------------------|----------------|----------------|--------------------|
| Gel Idx/Pos    | 45/B14   | Instr./Gel Origin      | AB4700/110211A | Process Status | Analysis Succeeded |
| Plate [#] Name | [1] 8907 | Instrument Sample Name |                | Spectra        | 8                  |

| Rank | Protein Name                                                                                           | Species | Accession No. | Protein MW | Protein PI | Pep. Count | Protein Score | Protein C. I. % | Protein Score | Protein C. I. % | Total Ion Score | Total Ion C. I. % |
|------|--------------------------------------------------------------------------------------------------------|---------|---------------|------------|------------|------------|---------------|-----------------|---------------|-----------------|-----------------|-------------------|
| 1    | RecName: Full=Serotransferrin; Short=Transferrin; AltName: Full=Beta-1 metal-binding globulin; AltName |         | gi 2501351    | 77702.7    | 6.75       | 26         | 500           | 100             | 363           | 100             |                 |                   |

| Peptide Information |             |         |       |            |          |          |           |         |                        | Rank   | Result Type |
|---------------------|-------------|---------|-------|------------|----------|----------|-----------|---------|------------------------|--------|-------------|
| Calc. Mass          | Obsrv. Mass | ± da    | ± ppm | Start Seq. | End Seq. | Sequence | Ion Score | C. I. % | Modification           |        |             |
| 887.4152            | 887.4124    | -0.0028 | -3    | 135        | 142      | SCHTGLGR |           |         | Carbamidomethyl (C)[2] | Mascot |             |

|   |                                        |              |         |      |    |     |     |     |     |
|---|----------------------------------------|--------------|---------|------|----|-----|-----|-----|-----|
| 2 | serotransferrin precursor [Bos taurus] | gi 114326282 | 77688.7 | 6.75 | 25 | 491 | 100 | 363 | 100 |
|---|----------------------------------------|--------------|---------|------|----|-----|-----|-----|-----|

| AVVAR     |                                        |              |         |       |        |       |        |       |        |
|-----------|----------------------------------------|--------------|---------|-------|--------|-------|--------|-------|--------|
| Accession | Protein                                | Score        | Length  | Score | Length | Score | Length | Score | Length |
| 3         | serotransferrin precursor [Bos taurus] | gil296490958 | 77615.7 | 7.13  | 24     | 477   | 100    | 363   | 100    |

| Peptide Information |             |         |       |            |          |                       |           |         |                            | Rank   | Result Type |
|---------------------|-------------|---------|-------|------------|----------|-----------------------|-----------|---------|----------------------------|--------|-------------|
| Calc. Mass          | Obsrv. Mass | ± da    | ± ppm | Start Seq. | End Seq. | Sequence              | Ion Score | C. I. % | Modification               |        |             |
| 887.4152            | 887.4124    | -0.0028 | -3    | 135        | 142      | SCHTGLGR              |           |         | Carbamidomethyl (C)[2]     | Mascot |             |
| 936.5009            | 936.4879    | -0.013  | -14   | 608        | 616      | GNHVAVSR              |           |         |                            | Mascot |             |
| 1097.505            | 1097.4905   | -0.0145 | -13   | 540        | 548      | YVYVTGAFR             | 54        | 98.613  |                            | Mascot |             |
| 1097.505            | 1097.4905   | -0.0145 | -13   | 540        | 548      | YVYVTGAFR             |           |         |                            | Mascot |             |
| 1104.4739           | 1104.4659   | -0.008  | -7    | 531        | 539      | ECVPNSNER             |           |         | Carbamidomethyl (C)[2]     | Mascot |             |
| 1156.5316           | 1156.522    | -0.0096 | -8    | 366        | 374      | WCAIGHQER             |           |         | Carbamidomethyl (C)[2]     | Mascot |             |
| 1156.5316           | 1156.522    | -0.0096 | -8    | 366        | 374      | WCAIGHQER             | 61        | 99.738  | Carbamidomethyl (C)[2]     | Mascot |             |
| 1311.6539           | 1311.6378   | -0.0161 | -12   | 156        | 166      | ELPDQESIQR            | 67        | 99.932  |                            | Mascot |             |
|                     | 1311.6378   |         |       |            |          |                       |           |         |                            | Mascot |             |
| 1311.6539           | 1311.6378   | -0.0161 | -12   | 156        | 166      | ELPDQESIQR            |           |         |                            | Mascot |             |
| 1335.6976           | 1335.6748   | -0.0228 | -17   | 48         | 59       | ILESFGPVCVK           |           |         | Carbamidomethyl (C)[10]    | Mascot |             |
| 1346.6157           | 1346.6075   | -0.0082 | -6    | 27         | 37       | WCTISTEANK            |           |         | Carbamidomethyl (C)[2]     | Mascot |             |
| 1354.6056           | 1354.595    | -0.0106 | -8    | 245        | 255      | NYELLGDNTR            |           |         | Carbamidomethyl (C)[6]     | Mascot |             |
| 1389.6758           | 1389.6504   | -0.0254 | -18   | 457        | 468      | TSDAINWNNLK           |           |         |                            | Mascot |             |
| 1482.7006           | 1482.6932   | -0.0074 | -5    | 245        | 256      | NYELLGDNTRK           |           |         | Carbamidomethyl (C)[6]     | Mascot |             |
| 1510.743            | 1510.7223   | -0.0207 | -14   | 595        | 607      | KPVTDAENCLAR          |           |         | Carbamidomethyl (C)[9]     | Mascot |             |
| 1510.743            | 1510.7223   | -0.0207 | -14   | 595        | 607      | KPVTDAENCLAR          | 63        | 99.84   | Carbamidomethyl (C)[9]     | Mascot |             |
| 1604.8068           | 1604.7848   | -0.022  | -14   | 107        | 120      | DNPTQHYAVVVK          |           |         |                            | Mascot |             |
| 1640.7664           | 1640.756    | -0.0104 | -6    | 230        | 243      | HSTVFNDLNPEDRK        |           |         |                            | Mascot |             |
| 1644.7111           | 1644.6998   | -0.0113 | -7    | 499        | 513      | DFEFSAGCAPGSPR        | 69        | 99.959  | Carbamidomethyl (C)[9]     | Mascot |             |
| 1644.7111           | 1644.6998   | -0.0113 | -7    | 499        | 513      | DFEFSAGCAPGSPR        |           |         | Carbamidomethyl (C)[9]     | Mascot |             |
| 1726.8257           | 1726.838    | 0.0123  | 7     | 540        | 553      | YVYVTAQRLQVEK         |           |         | Carbamidomethyl (C)[10]    | Mascot |             |
| 1757.8606           | 1757.8445   | -0.0161 | -9    | 300        | 314      | DKPNFQLQFSPPHGK       |           |         |                            | Mascot |             |
| 1768.8613           | 1768.848    | -0.0133 | -8    | 230        | 244      | HSTVFNDLNPEDRK        | 50        | 96.453  |                            | Mascot |             |
| 1768.8613           | 1768.848    | -0.0133 | -8    | 230        | 244      | HSTVFNDLNPEDRK        |           |         |                            | Mascot |             |
| 1994.8159           | 1994.7977   | -0.0182 | -9    | 200        | 216      | CACSNHEPYFGYSQAFK     |           |         | Carbamidomethyl (C)[1,3]   | Mascot |             |
| 2017.921            | 2017.9187   | -0.0023 | -1    | 561        | 578      | DTQVIQNTDGNNNENAIK    |           |         |                            | Mascot |             |
| 2261.9954           | 2261.9714   | -0.024  | -11   | 167        | 187      | AAANFFSASCVPACDQSSPKK |           |         | Carbamidomethyl (C)[10,13] | Mascot |             |



|              |              |          |                        |               |               |            |                |      |                    |                   |
|--------------|--------------|----------|------------------------|---------------|---------------|------------|----------------|------|--------------------|-------------------|
| Gel Idx/Pos  |              | 34/B15   | Instr/Gel Origin       | AB4700/11021A |               |            | Process Status |      | Analysis Succeeded |                   |
| Plate # Name |              | [1] 8907 | Instrument Sample Name |               |               |            | Spectra        | 8    |                    |                   |
| Rank         | Protein Name |          | Species                |               | Accession No. | Protein MW | Protein        | Pep. | Protein            | Protein Total Ion |

|   |                                                                                           |            |         |      |    | PI Count | Score | Score | Score | C. I. % |
|---|-------------------------------------------------------------------------------------------|------------|---------|------|----|----------|-------|-------|-------|---------|
|   |                                                                                           |            |         |      |    |          |       | Score | Score | C. I. % |
| 1 | RecName: Full=Serum albumin; AltName: Full=BSA; AltName: Name=BSA; EC=6.3.4.6; EC=6.3.4.6 | gil1351907 | 69248.4 | 5.82 | 21 | 740      | 100   | 573   | 100   |         |

| Peptide Identification |             |         |       |            |          |                  |           |         |                                          | Rank | Result Type |
|------------------------|-------------|---------|-------|------------|----------|------------------|-----------|---------|------------------------------------------|------|-------------|
| Calc. Mass             | Obsv. Mass  | ± da    | ± ppm | Start Seq. | End Seq. | Sequence         | Ion Score | C. I. % | Modification                             |      |             |
| 927.4934               | 927.4781    | -0.0153 | -16   | 161        | 167      | YLVEIAR          | 50        | 95.122  |                                          |      | Mascot      |
| 927.4934               | 927.4781    | -0.0153 | -16   | 161        | 167      | YLVEIAR          |           |         |                                          |      | Mascot      |
| 1138.4979              | 1138.486    | -0.0119 | -10   | 499        | 507      | CTCTSLVNR        |           |         | Carbamidomethyl (C)[1,2]                 |      | Mascot      |
| 1163.6306              | 1163.5904   | -0.0312 | -27   | 66         | 75       | LVNLETFAK        |           |         |                                          |      | Mascot      |
| 1193.6022              | 1193.595591 | -0.0071 | -6    | 25         | 34       | DTAKGEIAHR       |           |         |                                          |      | Mascot      |
| 1249.6211              | 1249.6021   | -0.019  | -15   | 35         | 44       | PKDLGEEHFK       |           |         |                                          |      | Mascot      |
| 1283.7106              | 1283.6934   | -0.0172 | -13   | 361        | 371      | HPEYAVSVLLR      |           |         |                                          |      | Mascot      |
| 1305.7161              | 1305.6901   | -0.026  | -20   | 402        | 412      | HLVDPEONLIK      |           |         |                                          |      | Mascot      |
| 1419.6936              | 1419.6726   | -0.021  | -15   | 89         | 100      | SLHTLFGDELCK     |           |         | Carbamidomethyl (C)[11]                  |      | Mascot      |
| 1439.8118              | 1439.79     | -0.0218 | -15   | 360        | 371      | RHPEYAVSVLLR     |           |         |                                          |      | Mascot      |
| 1439.8118              | 1439.79     | -0.0218 | -15   | 360        | 371      | RHPEYAVSVLLR     | 56        | 98.657  |                                          |      | Mascot      |
| 1479.7954              | 1479.7736   | -0.0218 | -15   | 421        | 433      | LGEYGFONALIVR    | 113       | 100     |                                          |      | Mascot      |
| 1479.7954              | 1479.7736   | -0.0218 | -15   | 421        | 433      | LGEYGFONALIVR    |           |         |                                          |      | Mascot      |
|                        | 1479.7736   |         |       |            |          |                  |           |         |                                          |      | Mascot      |
| 1567.7427              | 1567.7185   | -0.0242 | -15   | 347        | 359      | DAFLGSLVEYSR     | 119       | 100     |                                          |      | Mascot      |
| 1567.7427              | 1567.7185   | -0.0242 | -15   | 347        | 359      | DAFLGSLVEYSR     |           |         |                                          |      | Mascot      |
| 1639.9377              | 1639.9199   | -0.0178 | -11   | 437        | 451      | KVPQVSPTLVEYSR   | 72        | 99.965  |                                          |      | Mascot      |
| 1639.9377              | 1639.9199   | -0.0178 | -11   | 437        | 451      | KVPQVSPTLVEYSR   |           |         |                                          |      | Mascot      |
| 1724.8346              | 1724.808    | -0.0266 | -15   | 469        | 482      | MPCTEDYLSILNR    |           |         | Carbamidomethyl (C)[3]                   |      | Mascot      |
| 1740.8295              | 1740.7991   | -0.0304 | -17   | 469        | 482      | MPCTEDYLSILNR    |           |         | Carbamidomethyl (C)[3], Oxidation (M)[1] |      | Mascot      |
| 1880.9211              | 1880.8998   | -0.0313 | -17   | 508        | 523      | RPCFSALTPDQTVPK  | 98        | 100     | Carbamidomethyl (C)[3]                   |      | Mascot      |
| 1880.9211              | 1880.8998   | -0.0313 | -17   | 508        | 523      | RPCFSALTPDQTVPK  |           |         | Carbamidomethyl (C)[3]                   |      | Mascot      |
| 1888.9269              | 1888.8976   | -0.0293 | -16   | 169        | 183      | HPYFVAPPELLYANK  |           |         |                                          |      | Mascot      |
| 1907.9208              | 1907.8853   | -0.0355 | -19   | 529        | 544      | LTFHADIICDPTDEK  |           |         | Carbamidomethyl (C)[9]                   |      | Mascot      |
| 1927.7682              | 1927.7682   | -0.03   | -16   | 581        | 597      | CCAADQKEAGVAGPK  |           |         | Carbamidomethyl (C)[1,2,10]              |      | Mascot      |
| 2019.9691              | 2019.936257 | -0.0338 | -17   | 139        | 155      | LKPDNTLCEDEFADEK |           |         | Carbamidomethyl (C)[9]                   |      | Mascot      |
| 2045.028               | 2044.9915   | -0.0365 | -18   | 168        | 183      | RHPYFVAPPELLYANK |           |         |                                          |      | Mascot      |
| 2045.028               | 2044.9915   | -0.0365 | -18   | 168        | 183      | RHPYFVAPPELLYANK | 65        | 99.853  |                                          |      | Mascot      |
| 2056.8633              | 2056.9229   | 0.0596  | 29    | 264        | 280      | VHKECGDGLLECADDR |           |         | Carbamidomethyl (C)[5,6]                 |      | Mascot      |
| 2247.9426              | 2247.9065   | -0.0361 | -16   | 267        | 285      | ECCHDGLLECADDRDL |           |         | Carbamidomethyl (C)[2,3,10]              |      | Mascot      |

| AK |                          |             |         |      |    |     |     |     |     |
|----|--------------------------|-------------|---------|------|----|-----|-----|-----|-----|
| 2  | ALB protein [Bos taurus] | gi 74267962 | 69190.4 | 5.88 | 21 | 620 | 100 | 460 | 100 |

| Peptide Information |             |         |       | Start Seq. | End Seq. | Sequence         | Ion Score | C. I. % | Modification                | Rank | Result Type |
|---------------------|-------------|---------|-------|------------|----------|------------------|-----------|---------|-----------------------------|------|-------------|
| Calc. Mass          | Obsrv. Mass | ± da    | ± ppm |            |          |                  |           |         |                             |      |             |
| 927.4934            | 927.4781    | -0.0153 | -16   | 161        | 167      | YLVEIAR          | 50        | 95.122  |                             |      | Mascot      |
| 927.4934            | 927.4781    | -0.0153 | -16   | 161        | 167      | YLVEIAR          |           |         |                             |      | Mascot      |
| 1138.4979           | 1138.486    | -0.0119 | -10   | 499        | 507      | CTCTESLVNR       |           |         | Carbamidomethyl (C)[1,2]    |      | Mascot      |
| 1163.6306           | 1163.5994   | -0.0312 | -27   | 66         | 75       | LVNLETFAK        |           |         |                             |      | Mascot      |
| 1193.6022           | 1193.5951   | -0.0071 | -6    | 25         | 34       | DTHKSEIAHR       |           |         |                             |      | Mascot      |
| 1249.6211           | 1249.6021   | -0.019  | -15   | 35         | 44       | KDGLGEEHFK       |           |         |                             |      | Mascot      |
| 1283.7106           | 1283.6934   | -0.0172 | -13   | 361        | 371      | HPHEYAVSVLLR     |           |         |                             |      | Mascot      |
| 1305.7161           | 1305.6901   | -0.026  | -40   | 402        | 412      | HLVDEPNLIK       |           |         |                             |      | Mascot      |
| 1419.6936           | 1419.6726   | -0.021  | -15   | 89         | 100      | SLHTLGDDELCK     |           |         | Carbamidomethyl (C)[11]     |      | Mascot      |
| 1439.8118           | 1439.79     | -0.0218 | -15   | 360        | 371      | RHPEYAVSVLLR     |           |         |                             |      | Mascot      |
| 1439.8118           | 1439.79     | -0.0218 | -15   | 360        | 371      | RHPEYAVSVLLR     | 56        | 98.657  |                             |      | Mascot      |
| 1537.8009           | 1537.7811   | -0.0198 | -13   | 421        | 433      | LGFGYQNELIVR     |           |         |                             |      | Mascot      |
| 1567.7427           | 1567.7185   | -0.0242 | -15   | 347        | 359      | DAFLGSRLVEYSR    | 119       | 100     |                             |      | Mascot      |
| 1567.7427           | 1567.7185   | -0.0242 | -15   | 347        | 359      | DAFLGSRLVEYSR    |           |         |                             |      | Mascot      |
| 1639.9377           | 1639.9199   | -0.0178 | -11   | 437        | 451      | KVQPVSTPTLVEYSR  | 72        | 99.965  |                             |      | Mascot      |
| 1639.9377           | 1639.9199   | -0.0178 | -11   | 437        | 451      | KVQPVSTPTLVEYSR  |           |         |                             |      | Mascot      |
| 1694.824            | 1694.8103   | -0.0137 | -8    | 469        | 482      | MPCAEDYLSILNLR   |           |         | Carbamidomethyl (C)[3]      |      | Mascot      |
| 1880.9211           | 1880.8898   | -0.0313 | -17   | 508        | 523      | RPCFSALTPDITYVPK | 98        | 100     | Carbamidomethyl (C)[3]      |      | Mascot      |
| 1880.9211           | 1880.8898   | -0.0313 | -17   | 508        | 523      | RPCFSALTPDITYVPK |           |         | Carbamidomethyl (C)[3]      |      | Mascot      |
| 1888.9269           | 1888.8976   | -0.0293 | -16   | 169        | 183      | HPHYFAPELLYYANK  |           |         |                             |      | Mascot      |
| 1907.9208           | 1907.8853   | -0.0355 | -19   | 529        | 544      | LFTFHDGKILPTQEK  |           |         | Carbamidomethyl (C)[9]      |      | Mascot      |
| 1927.7982           | 1927.7682   | -0.03   | -16   | 581        | 597      | CCAADDKEAFVAGPK  |           |         | Carbamidomethyl (C)[1,2,10] |      | Mascot      |
| 2019.9691           | 2019.9352   | -0.0339 | -17   | 139        | 155      | LKPDNTLCDFEKADEK |           |         | Carbamidomethyl (C)[9]      |      | Mascot      |
| 2045.028            | 2044.9915   | -0.0365 | -18   | 168        | 183      | RHPFYFAPELLYYANK |           |         |                             |      | Mascot      |
| 2045.028            | 2044.9915   | -0.0365 | -18   | 168        | 183      | RHPFYFAPELLYYANK | 65        | 99.853  |                             |      | Mascot      |
| 2056.8633           | 2056.9229   | 0.0596  | 29    | 264        | 280      | VHKECGHDLLECADDR |           |         | Carbamidomethyl (C)[5,6]    |      | Mascot      |
| 2247.9426           | 2247.9065   | -0.0361 | -16   | 267        | 285      | ECCHGDLLECADDRIL |           |         | Carbamidomethyl (C)[2,3,10] |      | Mascot      |

|   |                                                 |              |         |      |    |     |     |     |     |
|---|-------------------------------------------------|--------------|---------|------|----|-----|-----|-----|-----|
| 3 | ALB protein [Bos taurus]<br>Peptide Information | gi 154425704 | 69248.5 | 5.95 | 20 | 606 | 100 | 460 | 100 |
|---|-------------------------------------------------|--------------|---------|------|----|-----|-----|-----|-----|

|  | Calc. Mass | Obsrv. Mass | ± da    | ± ppm | Start Seq. | End Seq. | Sequence         | Ion Score | C. I. % | Modification             | Rank | Result Type |
|--|------------|-------------|---------|-------|------------|----------|------------------|-----------|---------|--------------------------|------|-------------|
|  | 927.4934   | 927.4781    | -0.0153 | -16   | 161        | 167      | YLVEIAR          | 50        | 95.122  |                          |      | Mascot      |
|  | 927.4934   | 927.4781    | -0.0153 | -16   | 161        | 167      | YLVEIAR          |           |         |                          |      | Mascot      |
|  | 1138.4979  | 1138.486    | -0.0119 | -10   | 499        | 507      | CTCESLVNLR       |           |         | Carbamidomethyl (C)[1,2] |      | Mascot      |
|  | 1163.6306  | 1163.5994   | -0.0312 | -27   | 66         | 75       | LVNELTEFAK       |           |         |                          |      | Mascot      |
|  | 1249.6211  | 1249.6021   | -0.019  | -15   | 35         | 44       | FKDLGEEHFK       |           |         |                          |      | Mascot      |
|  | 1283.7106  | 1283.6934   | -0.0172 | -13   | 361        | 371      | RHEPYAVSVLLR     |           |         |                          |      | Mascot      |
|  | 1305.7161  | 1305.6901   | -0.026  | -20   | 402        | 412      | HLVDFONLIK       |           |         |                          |      | Mascot      |
|  | 1419.6936  | 1419.6726   | -0.021  | -15   | 89         | 100      | SLHTFGDELCK      |           |         | Carbamidomethyl (C)[11]  |      | Mascot      |
|  | 1439.8118  | 1439.79     | -0.0218 | -15   | 360        | 371      | RHEPYAVSVLLR     |           |         |                          |      | Mascot      |
|  | 1439.8118  | 1439.79     | -0.0218 | -15   | 360        | 371      | RHEPYAVSVLLR     | 56        | 98.657  |                          |      | Mascot      |
|  | 1537.8009  | 1537.7811   | -0.0198 | -13   | 421        | 433      | LGEYGONELIVR     |           |         |                          |      | Mascot      |
|  | 1567.7427  | 1567.7185   | -0.0242 | -15   | 347        | 359      | DAFLGSLVEYSR     | 119       | 100     |                          |      | Mascot      |
|  | 1567.7427  | 1567.7185   | -0.0242 | -15   | 347        | 359      | DAFLGSLVEYSR     |           |         |                          |      | Mascot      |
|  | 1639.9377  | 1639.9199   | -0.0178 | -11   | 437        | 451      | KVPQVPTPTLVEYSR  | 72        | 99.965  |                          |      | Mascot      |
|  | 1639.9377  | 1639.9199   | -0.0178 | -11   | 437        | 451      | KVPQVPTPTLVEYSR  |           |         |                          |      | Mascot      |
|  | 1694.824   | 1694.8103   | -0.0137 | -8    | 469        | 482      | MPACDEYLSLINR    |           |         | Carbamidomethyl (C)[3]   |      | Mascot      |
|  | 1880.9211  | 1880.8898   | -0.0313 | -17   | 508        | 523      | RPCFSALTPDITYVPK | 98        | 100     | Carbamidomethyl (C)[3]   |      | Mascot      |
|  | 1880.9211  | 1880.8898   | -0.0313 | -17   | 508        | 523      | RPCFSALTPDITYVPK |           |         | Carbamidomethyl (C)[3]   |      | Mascot      |

|   |                             |             |         |       |            |          |                     |  |             |         |                                          |  |                             |    |     |      |        |        |     |
|---|-----------------------------|-------------|---------|-------|------------|----------|---------------------|--|-------------|---------|------------------------------------------|--|-----------------------------|----|-----|------|--------|--------|-----|
|   | 1898.9269                   | 1898.8976   | -0.0293 | -3    | 169        | 183      | HPHYFAPPELLYYANK    |  |             |         |                                          |  | Mascot                      |    |     |      |        |        |     |
|   | 1907.9208                   | 1907.8853   | -0.0355 | -19   | 529        | 544      | LFTFHADICTLPDTEK    |  |             |         |                                          |  | Carbamidomethyl (C)[9]      |    |     |      |        | Mascot |     |
|   |                             | 1907.8853   |         |       |            |          |                     |  |             |         |                                          |  |                             |    |     |      |        | Mascot |     |
|   | 1927.7982                   | 1927.7682   | -0.03   | -6    | 581        | 597      | CAAADCKEACFAVEGPK   |  |             |         |                                          |  | Carbamidomethyl (C)[1,2,10] |    |     |      |        | Mascot |     |
|   | 2045.0691                   | 2049.9352   | -0.0339 | -17   | 139        | 155      | LKPDPNTLCDEFKADEK   |  |             |         |                                          |  | Carbamidomethyl (C)[9]      |    |     |      |        | Mascot |     |
|   | 2049.928                    | 2044.9915   | -0.0365 | -18   | 168        | 183      | RHPHYFAPPELLYYANK   |  |             |         |                                          |  |                             |    |     |      |        | Mascot |     |
|   | 2045.028                    | 2044.9015   | -0.0365 | -18   | 168        | 183      | RHPHYFAPPELLYYANK   |  |             |         |                                          |  |                             |    |     |      |        | Mascot |     |
|   | 2056.8633                   | 2056.9229   | 0.0596  | 29    | 264        | 280      | VHKECGHDLLCEADDOR   |  | 65          | 99.853  |                                          |  | Carbamidomethyl (C)[5,6]    |    |     |      |        | Mascot |     |
|   | 2247.9426                   | 2247.9065   | -0.0361 | -16   | 267        | 285      | ECHCGDLLCEADDRADLAK |  |             |         |                                          |  | Carbamidomethyl (C)[2,3,10] |    |     |      |        | Mascot |     |
| 4 | serum albumin [Bos indicus] |             |         |       |            |          |                     |  | gil76445989 |         | 53890.1                                  |  | 6.09                        | 13 | 538 |      | 100    | 457    | 100 |
|   | Peptide Information         |             |         |       |            |          |                     |  |             |         |                                          |  |                             |    |     |      |        |        |     |
|   | Calc. Mass                  | Obsrv. Mass | ± da    | ± ppm | Start Seq. | End Seq. | Sequence            |  | Ion Score   | C. I. % | Modification                             |  |                             |    |     | Rank | Result | Type   |     |
|   | 1138.4979                   | 1138.486    | -0.0119 | -10   | 368        | 376      | CCTESLVNR           |  |             |         | Carbamidomethyl (C)[1,2]                 |  |                             |    |     |      |        | Mascot |     |
|   | 1283.7106                   | 1283.6934   | -0.0172 | -13   | 230        | 240      | HPEYAVSVLLR         |  |             |         |                                          |  |                             |    |     |      |        | Mascot |     |
|   | 1305.7161                   | 1305.6901   | -0.026  | -20   | 271        | 281      | HLVDEPNLIK          |  |             |         |                                          |  |                             |    |     |      |        | Mascot |     |
|   | 1439.8118                   | 1439.79     | -0.0218 | -15   | 229        | 240      | RHPEYAVSVLLR        |  |             |         |                                          |  |                             |    |     |      |        | Mascot |     |
|   | 1439.8118                   | 1439.79     | -0.0218 | -15   | 229        | 240      | RHPEYAVSVLLR        |  | 56          | 98.657  |                                          |  |                             |    |     |      |        | Mascot |     |
|   | 1479.7954                   | 1479.7736   | -0.0218 | -15   | 290        | 302      | LGEYGFQNALIVR       |  | 113         | 100     |                                          |  |                             |    |     |      |        | Mascot |     |
|   | 1479.7954                   | 1479.7736   | -0.0218 | -15   | 290        | 302      | LGEYGFQNALIVR       |  |             |         |                                          |  |                             |    |     |      |        | Mascot |     |
|   | 1567.7427                   | 1567.7185   | -0.0242 | -15   | 216        | 228      | DAFLGSRLYEYSR       |  | 119         | 100     |                                          |  |                             |    |     |      |        | Mascot |     |
|   | 1567.7427                   | 1567.7185   | -0.0242 | -15   | 216        | 228      | DAFLGSRLYEYSR       |  |             |         |                                          |  |                             |    |     |      |        | Mascot |     |
|   | 1639.9377                   | 1639.9199   | -0.0178 | -11   | 306        | 320      | KVPQVSPTPLVEYSR     |  | 72          | 99.965  |                                          |  |                             |    |     |      |        | Mascot |     |
|   | 1639.9377                   | 1639.9199   | -0.0178 | -11   | 306        | 320      | KVPQVSPTPLVEYSR     |  |             |         |                                          |  |                             |    |     |      |        | Mascot |     |
|   | 1724.8346                   | 1724.808    | -0.0266 | -15   | 338        | 351      | MPCTEDYLSILNLR      |  |             |         | Carbamidomethyl (C)[3]                   |  |                             |    |     |      |        | Mascot |     |
|   | 1740.8295                   | 1740.7991   | -0.0304 | -17   | 338        | 351      | MPCTEDYLSILNLR      |  |             |         | Carbamidomethyl (C)[3], Oxidation (M)[1] |  |                             |    |     |      |        | Mascot |     |
|   | 1880.9211                   | 1880.8898   | -0.0313 | -17   | 377        | 392      | RPCFSALTPDETYPVK    |  | 98          | 100     | Carbamidomethyl (C)[3]                   |  |                             |    |     |      |        | Mascot |     |
|   | 1880.9211                   | 1880.8898   | -0.0313 | -17   | 377        | 392      | RPCFSALTPDETYPVK    |  |             |         | Carbamidomethyl (C)[3]                   |  |                             |    |     |      |        | Mascot |     |
|   | 1907.9208                   | 1907.8853   | -0.0355 | -19   | 398        | 413      | LFTFHADICTLPDTEK    |  |             |         | Carbamidomethyl (C)[9]                   |  |                             |    |     |      |        | Mascot |     |
|   | 1927.7982                   | 1927.7682   | -0.03   | -6    | 450        | 466      | CAAADCKEACFAVEGPK   |  |             |         | Carbamidomethyl (C)[1,2,10]              |  |                             |    |     |      |        | Mascot |     |
|   | 2056.8633                   | 2056.9229   | 0.0596  | 29    | 133        | 149      | VHKECHGDLLCEADDOR   |  |             |         | Carbamidomethyl (C)[5,6]                 |  |                             |    |     |      |        | Mascot |     |
|   | 2247.9426                   | 2247.9065   | -0.0361 | -16   | 136        | 154      | ECHCGDLLCEADDRADLAK |  |             |         | Carbamidom                               |  |                             |    |     |      |        |        |     |

|           |           |         |     |     |     |                     |    |        |                             |        |
|-----------|-----------|---------|-----|-----|-----|---------------------|----|--------|-----------------------------|--------|
| 1567.826  | 1567.7185 | -0.1075 | -69 | 484 | 496 | LCVLHEKTPVSR        |    |        | Carbamidomethyl (C)[2]      | Mascot |
| 1639.9377 | 1639.9199 | -0.0178 | -11 | 438 | 452 | KVPOVSTPTLVEVSR     | 72 | 99.965 |                             | Mascot |
| 1639.9377 | 1639.9199 | -0.0178 | -11 | 439 | 453 | VPOVSTPTLVEVSRK     |    |        |                             | Mascot |
| 2056.8633 | 2056.8229 | 0.0596  | 29  | 266 | 281 | VHKECHGDLLCEADDR    |    |        | Carbamidomethyl (C)[5,6]    | Mascot |
| 2247.9426 | 2247.9065 | -0.0361 | -16 | 268 | 286 | ECCHGDLLCEADDRADLAK |    |        | Carbamidomethyl (C)[2,3,10] | Mascot |

10 albumin precursor [Capra hircus] g|193085052 66269.8 5.58 15 211 100 121 100

| Peptide Information |             |         |       |            |          |                     |           |         |                                          | Rank   | Result Type |
|---------------------|-------------|---------|-------|------------|----------|---------------------|-----------|---------|------------------------------------------|--------|-------------|
| Calc. Mass          | Obsrv. Mass | ± da    | ± ppm | Start Seq. | End Seq. | Sequence            | Ion Score | C. I. % | Modification                             |        |             |
| 1138.4979           | 1138.486    | -0.0119 | -10   | 475        | 483      | CTCESLVNR           |           |         | Carbamidomethyl (C)[1,2]                 | Mascot |             |
| 1149.5608           | 1149.4597   | -0.1011 | -88   | 564        | 573      | EGCFLEGPK           |           |         | Carbamidomethyl (C)[3]                   | Mascot |             |
| 1163.5435           | 1163.5994   | 0.0559  | 48    | 276        | 285      | ECCDKPVLK           |           |         |                                          | Mascot |             |
| 1193.6022           | 1193.5951   | -0.0071 | -6    | 1          | 10       | DTWKSEIARR          |           |         |                                          | Mascot |             |
| 1283.7106           | 1283.6934   | -0.0172 | -13   | 337        | 347      | HPEYAVSVLLR         |           |         |                                          | Mascot |             |
| 1305.7161           | 1305.6901   | -0.026  | -20   | 378        | 388      | HLVDEPNLIK          |           |         |                                          | Mascot |             |
| 1419.6936           | 1419.6726   | -0.021  | -15   | 65         | 76       | SLHTLFGDELCK        |           |         | Carbamidomethyl (C)[11]                  | Mascot |             |
| 1439.8118           | 1439.79     | -0.0218 | -15   | 336        | 347      | RHPEYAVSVLLR        |           |         |                                          | Mascot |             |
| 1439.8118           | 1439.79     | -0.0218 | -15   | 336        | 347      | RHPEYAVSVLLR        | 56        | 98.657  |                                          | Mascot |             |
| 1724.8346           | 1724.808    | -0.0266 | -15   | 445        | 458      | MPCTEDYLSLNR        |           |         | Carbamidomethyl (C)[3]                   | Mascot |             |
| 1740.8295           | 1740.7991   | -0.0304 | -17   | 445        | 458      | MPCTEDYLSLNR        |           |         | Carbamidomethyl (C)[3], Oxidation (M)[1] | Mascot |             |
| 1888.9269           | 1888.8976   | -0.0293 | -16   | 145        | 159      | HPFYAPELLYANK       |           |         |                                          | Mascot |             |
| 1907.9167           | 1907.8853   | -0.0314 | -16   | 257        | 273      | ADLAKYICDQDTLSSK    |           |         |                                          | Mascot |             |
| 2019.7728           | 2019.9352   | 0.1624  | 80    | 82         | 98       | ETYGDMADCCCKEPEPER  |           |         | Oxidation (M)[6]                         | Mascot |             |
| 2045.028            | 2044.9915   | -0.0365 | -18   | 144        | 159      | RHPFYAPELLYANK      |           |         |                                          | Mascot |             |
| 2045.028            | 2044.9915   | -0.0365 | -18   | 144        | 159      | RHPFYAPELLYANK      | 65        | 99.853  |                                          | Mascot |             |
| 2056.8633           | 2056.8229   | 0.0596  | 29    | 240        | 256      | VHKECHGDLLCEADDR    |           |         | Carbamidomethyl (C)[5,6]                 | Mascot |             |
| 2247.9426           | 2247.9065   | -0.0361 | -16   | 243        | 261      | ECCHGDLLCEADDRADLAK |           |         | Carbamidomethyl (C)[2,3,10]              | Mascot |             |

|                |              |          |                   |                |                |                  |                    |                        |                   |
|----------------|--------------|----------|-------------------|----------------|----------------|------------------|--------------------|------------------------|-------------------|
| Gel Idx/Pos    |              | 46/B16   | Instr./Gel Origin | AB4700/110211A | Process Status |                  | Analysis Succeeded |                        |                   |
| Plate (#) Name |              | [1] 8907 |                   |                | Spectra        |                  | 8                  |                        |                   |
| Rank           | Protein Name |          | Species           | Accession No.  | Protein MW     | Protein PI Count | Protein Score      | Protein xtal Ion Score | Total Ion C. I. % |

1 RecName: Full=Serum albumin; AltName: Full=BSA; g|1351907 69248.4 5.82 20 750 100 608 100  
AltName: Allergen=Bos d 6; Flags: Precursor

| Peptide Information |             |         |       |            |          |                       |           |         |                                          | Rank   | Result Type |
|---------------------|-------------|---------|-------|------------|----------|-----------------------|-----------|---------|------------------------------------------|--------|-------------|
| Calc. Mass          | Obsrv. Mass | ± da    | ± ppm | Start Seq. | End Seq. | Sequence              | Ion Score | C. I. % | Modification                             |        |             |
| 927.4934            | 927.491     | -0.0024 | -3    | 161        | 167      | LYLVEIAR              | 44        | 80.184  |                                          | Mascot |             |
| 927.4934            | 927.491     | -0.0024 | -3    | 161        | 167      | LYLVEIAR              |           |         |                                          | Mascot |             |
| 1138.4979           | 1138.5045   | 0.0066  | 6     | 499        | 507      | CTCESLVNR             |           |         | Carbamidomethyl (C)[1,2]                 | Mascot |             |
| 1163.6306           | 1163.6217   | -0.0089 | -8    | 66         | 75       | LVNELTEFAK            |           |         |                                          | Mascot |             |
| 1249.6211           | 1249.6157   | -0.0054 | -4    | 35         | 44       | FKDLGEEHFK            |           |         |                                          | Mascot |             |
| 1283.7106           | 1283.7174   | 0.0068  | 5     | 361        | 371      | HPEYAVSVLLR           |           |         |                                          | Mascot |             |
| 1305.7161           | 1305.7102   | -0.0059 | -5    | 402        | 412      | HLVDEPNLIK            |           |         |                                          | Mascot |             |
| 1419.6936           | 1419.6892   | -0.0044 | -3    | 89         | 100      | SLHTLFGDELCK          |           |         | Carbamidomethyl (C)[11]                  | Mascot |             |
| 1439.8118           | 1439.8123   | 0.0005  | 0     | 360        | 371      | RHPEYAVSVLLR          |           |         |                                          | Mascot |             |
| 1439.8118           | 1439.8123   | 0.0005  | 0     | 360        | 371      | RHPEYAVSVLLR          | 77        | 99.99   |                                          | Mascot |             |
| 1479.7954           | 1479.7986   | 0.0032  | 2     | 421        | 433      | LGEYGFQNALIVR         |           |         |                                          | Mascot |             |
| 1479.7954           | 1479.7986   | 0.0032  | 2     | 421        | 433      | LGEYGFQNALIVR         | 100       | 100     |                                          | Mascot |             |
| 1567.7427           | 1567.7485   | 0.0058  | 4     | 347        | 359      | DAFLGSFLVEYSR         | 130       | 100     |                                          | Mascot |             |
| 1567.7427           | 1567.7485   | 0.0058  | 4     | 347        | 359      | DAFLGSFLVEYSR         |           |         |                                          | Mascot |             |
| 1639.9377           | 1639.9451   | 0.0074  | 5     | 437        | 451      | KVPOVSTPTLVEVSR       |           |         |                                          | Mascot |             |
| 1724.8346           | 1724.842    | 0.0074  | 4     | 469        | 482      | MPCTEDYLSLNR          |           |         | Carbamidomethyl (C)[3]                   | Mascot |             |
| 1724.8346           | 1724.842    | 0.0074  | 4     | 469        | 482      | MPCTEDYLSLNR          | 97        | 100     | Carbamidomethyl (C)[3]                   | Mascot |             |
| 1740.8295           | 1740.8284   | -0.0011 | -1    | 469        | 482      | MPCTEDYLSLNR          |           |         | Carbamidomethyl (C)[3], Oxidation (M)[1] | Mascot |             |
| 1880.9211           | 1880.927    | 0.0059  | 3     | 508        | 523      | RPCFSALTPDITYVPK      | 80        | 99.995  | Carbamidomethyl (C)[3]                   | Mascot |             |
| 1880.9211           | 1880.927    | 0.0059  | 3     | 508        | 523      | RPCFSALTPDITYVPK      |           |         | Carbamidomethyl (C)[3]                   | Mascot |             |
| 1888.9269           | 1888.9346   | 0.0077  | 4     | 169        | 183      | HPFYAPELLYANK         |           |         |                                          | Mascot |             |
| 1907.9208           | 1907.921    | 0.0002  | 0     | 529        | 544      | LFTFHADICTLPDTEK      |           |         | Carbamidomethyl (C)[9]                   | Mascot |             |
| 1927.7982           | 1927.8042   | 0.006   | 3     | 581        | 597      | CAAADKACFAVEGPK       |           |         | Carbamidomethyl (C)[1,2,10]              | Mascot |             |
| 2019.9691           | 2019.976    | 0.0069  | 3     | 139        | 155      | LKPDNPTLCEFKADEK      |           |         | Carbamidomethyl (C)[9]                   | Mascot |             |
| 2045.028            | 2045.0348   | 0.0068  | 3     | 168        | 183      | RHPFYAPELLYANK        | 80        | 99.996  |                                          | Mascot |             |
| 2045.028            | 2045.0348   | 0.0068  | 3     | 168        | 183      | RHPFYAPELLYANK        |           |         |                                          | Mascot |             |
| 2247.9426           | 2247.9531   | 0.0105  | 5     | 267        | 285      | ECCHGDLLCEADDRADLAK   |           |         | Carbamidomethyl (C)[2,3,10]              | Mascot |             |
| 2492.2642           | 2492.2686   | 0.0044  | 2     | 45         | 65       | GLVLIAFSQYLQCCPFDEHVK |           |         | Carbamidomethyl (C)[14]                  | Mascot |             |

2 serum albumin [Bos indicus] g|76445989 53890.1 6.09 12 549 100 484 100

| Peptide Information |             |         |       |            |          |                     |           |         |                                          | Rank   | Result Type |
|---------------------|-------------|---------|-------|------------|----------|---------------------|-----------|---------|------------------------------------------|--------|-------------|
| Calc. Mass          | Obsrv. Mass | ± da    | ± ppm | Start Seq. | End Seq. | Sequence            | Ion Score | C. I. % | Modification                             |        |             |
| 1138.4979           | 1138.5045   | 0.0066  | 6     | 368        | 375      | CTCESLVNR           |           |         | Carbamidomethyl (C)[1,2]                 | Mascot |             |
| 1283.7106           | 1283.7174   | 0.0068  | 5     | 230        | 240      | HPEYAVSVLLR         |           |         |                                          | Mascot |             |
| 1305.7161           | 1305.7102   | -0.0059 | -5    | 271        | 281      | HLVDEPNLIK          |           |         |                                          | Mascot |             |
| 1439.8118           | 1439.8123   | 0.0005  | 0     | 229        | 240      | RHPEYAVSVLLR        |           |         |                                          | Mascot |             |
| 1439.8118           | 1439.8123   | 0.0005  | 0     | 229        | 240      | RHPEYAVSVLLR        | 77        | 99.99   |                                          | Mascot |             |
| 1479.7954           | 1479.7986   | 0.0032  | 2     | 290        | 302      | LGEYGFQNALIVR       |           |         |                                          | Mascot |             |
| 1479.7954           | 1479.7986   | 0.0032  | 2     | 290        | 302      | LGEYGFQNALIVR       | 100       | 100     |                                          | Mascot |             |
| 1567.7427           | 1567.7485   | 0.0058  | 4     | 216        | 228      | DAFLGSFLVEYSR       | 130       | 100     |                                          | Mascot |             |
| 1567.7427           | 1567.7485   | 0.0058  | 4     | 216        | 228      | DAFLGSFLVEYSR       |           |         |                                          | Mascot |             |
| 1639.9377           | 1639.9451   | 0.0074  | 5     | 306        | 320      | KVPOVSTPTLVEVSR     |           |         |                                          | Mascot |             |
| 1724.8346           | 1724.842    | 0.0074  | 4     | 338        | 351      | MPCTEDYLSLNR        |           |         | Carbamidomethyl (C)[3]                   | Mascot |             |
| 1724.8346           | 1724.842    | 0.0074  | 4     | 338        | 351      | MPCTEDYLSLNR        | 97        | 100     | Carbamidomethyl (C)[3]                   | Mascot |             |
| 1740.8295           | 1740.8284   | -0.0011 | -1    | 338        | 351      | MPCTEDYLSLNR        |           |         | Carbamidomethyl (C)[3], Oxidation (M)[1] | Mascot |             |
| 1880.9211           | 1880.927    | 0.0059  | 3     | 377        | 392      | RPCFSALTPDITYVPK    | 80        | 99.995  | Carbamidomethyl (C)[3]                   | Mascot |             |
| 1880.9211           | 1880.927    | 0.0059  | 3     | 377        | 392      | RPCFSALTPDITYVPK    |           |         | Carbamidomethyl (C)[3]                   | Mascot |             |
| 1907.9208           | 1907.921    | 0.0002  | 0     | 398        | 413      | LFTFHADICTLPDTEK    |           |         | Carbamidomethyl (C)[9]                   | Mascot |             |
| 1927.7982           | 1927.8042   | 0.006   | 3     | 450        | 466      | CAAADKACFAVEGPK     |           |         | Carbamidomethyl (C)[1,2,10]              | Mascot |             |
| 2247.9426           | 2247.9531   | 0.0105  | 5     | 136        | 154      | ECCHGDLLCEADDRADLAK |           |         | Carbamidomethyl (C)[2,3,10]              | Mascot |             |

3 ALB protein [Bos taurus] g|74267962 69190.4 5.88 20 547 100 411 100

| Peptide Information |             |         |       |            |          |                     |           |         |                                          | Rank   | Result Type |
|---------------------|-------------|---------|-------|------------|----------|---------------------|-----------|---------|------------------------------------------|--------|-------------|
| Calc. Mass          | Obsrv. Mass | ± da    | ± ppm | Start Seq. | End Seq. | Sequence            | Ion Score | C. I. % | Modification                             |        |             |
| 927.4934            | 927.491     | -0.0024 | -3    | 161        | 167      | LYLVEIAR            | 44        | 80.184  |                                          | Mascot |             |
| 927.4934            | 927.491     | -0.0024 | -3    | 161        | 167      | LYLVEIAR            |           |         |                                          | Mascot |             |
| 1138.4979           | 1138.5045   | 0.0066  | 6     | 499        | 507      | CTCESLVNR           |           |         | Carbamidomethyl (C)[1,2]                 | Mascot |             |
| 1163.6306           | 1163.6217   | -0.0089 | -8    | 66         | 75       | LVNELTEFAK          |           |         |                                          | Mascot |             |
| 1249.6211           | 1249.6157   | -0.0054 | -4    | 35         | 44       | FKDLGEEHFK          |           |         |                                          | Mascot |             |
| 1283.7106           | 1283.7174   | 0.0068  | 5     | 361        | 371      | HPEYAVSVLLR         |           |         |                                          | Mascot |             |
| 1305.7161           | 1305.7102   | -0.0059 | -5    | 402        | 412      | HLVDEPNLIK          |           |         |                                          | Mascot |             |
| 1419.6936           | 1419.6892   | -0.0044 | -3    | 89         | 100      | SLHTLFGDELCK        |           |         | Carbamidomethyl (C)[11]                  | Mascot |             |
| 1439.8118           | 1439.8123   | 0.0005  | 0     | 360        | 371      | RHPEYAVSVLLR        |           |         |                                          | Mascot |             |
| 1439.8118           | 1439.8123   | 0.0005  | 0     | 360        | 371      | RHPEYAVSVLLR        | 77        | 99.99   |                                          | Mascot |             |
| 1537.8009           | 1537.8083   | 0.0074  | 5     | 421        | 433      | LGEYGFQNALIVR       |           |         |                                          | Mascot |             |
| 1567.7427           | 1567.7485   | 0.0058  | 4     | 347        | 359      | DAFLGSFLVEYSR       | 130       | 100     |                                          | Mascot |             |
| 1567.7427           | 1567.7485   | 0.0058  | 4     | 347        | 359      | DAFLGSFLVEYSR       |           |         |                                          | Mascot |             |
| 1639.9377           | 1639.9451   | 0.0074  | 5     | 437        | 451      | KVPOVSTPTLVEVSR     |           |         |                                          | Mascot |             |
| 1694.824            | 1694.8267   | 0.0027  | 2     | 469        | 482      | MPCAEDYLSLNR        |           |         | Carbamidomethyl (C)[3]                   | Mascot |             |
| 1710.819            | 1710.8236   | 0.0046  | 3     | 469        | 482      | MPCAEDYLSLNR        |           |         | Carbamidomethyl (C)[3], Oxidation (M)[1] | Mascot |             |
| 1880.9211           | 1880.927    | 0.0059  | 3     | 508        | 523      | RPCFSALTPDITYVPK    | 80        | 99.995  | Carbamidomethyl (C)[3]                   | Mascot |             |
| 1880.9211           | 1880.927    | 0.0059  | 3     | 508        | 523      | RPCFSALTPDITYVPK    |           |         | Carbamidomethyl (C)[3]                   | Mascot |             |
| 1888.9269           | 1888.9346   | 0.0077  | 4     | 169        | 183      | HPFYAPELLYANK       |           |         |                                          | Mascot |             |
| 1907.9208           | 1907.921    | 0.0002  | 0     | 529        | 544      | LFTFHADICTLPDTEK    |           |         | Carbamidomethyl (C)[9]                   | Mascot |             |
| 1927.7982           | 1927.8042   | 0.006   | 3     | 581        | 597      | CAAADKACFAVEGPK     |           |         | Carbamidomethyl (C)[1,2,10]              | Mascot |             |
| 2019.9691           | 2019.976    | 0.0069  | 3     | 139        | 155      | LKPDNPTLCEFKADEK    |           |         | Carbamidomethyl (C)[9]                   | Mascot |             |
| 2045.028            | 2045.0348   | 0.0068  | 3     | 168        | 183      | RHPFYAPELLYANK      | 80        | 99.996  |                                          | Mascot |             |
| 2045.028            | 2045.0348   | 0.0068  | 3     | 168        | 183      | RHPFYAPELLYANK      |           |         |                                          | Mascot |             |
| 2247.9426           | 2247.9531   | 0.0105  | 5     | 267        | 285      | ECCHGDLLCEADDRADLAK |           |         | Carbamidomethyl (C)[2,3,10]              | Mascot |             |

|   |                                  |             |         |       |            |          |                           |             |                         |                                          |        |      |             |     |     |  |  |  |  |
|---|----------------------------------|-------------|---------|-------|------------|----------|---------------------------|-------------|-------------------------|------------------------------------------|--------|------|-------------|-----|-----|--|--|--|--|
|   | 2492.2642                        | 2492.2686   | 0.0044  | 2     | 45         | 65       | GLVLIAFSQYLQQCPFDE<br>HVK |             | Carbamidomethyl (C)[14] |                                          | Mascot |      |             |     |     |  |  |  |  |
| 4 | albumin                          |             |         |       |            |          |                           | g 229552    | 66087.6                 | 5.76                                     | 18     | 546  | 100         | 428 | 100 |  |  |  |  |
|   | Peptide Information              |             |         |       |            |          |                           |             |                         |                                          |        |      |             |     |     |  |  |  |  |
|   | Calc. Mass                       | Obsrv. Mass | ± da    | ± ppm | Start Seq. | End Seq. | Sequence                  | Ion Score   | C. I. %                 | Modification                             |        | Rank | Result Type |     |     |  |  |  |  |
|   | 927.4934                         | 927.491     | -0.0024 | -3    | 137        | 143      | YLVEIAR                   | 44          | 80.184                  |                                          |        |      | Mascot      |     |     |  |  |  |  |
|   | 927.4934                         | 927.491     | -0.0024 | -3    | 137        | 143      | YLVEIAR                   |             |                         |                                          |        |      | Mascot      |     |     |  |  |  |  |
|   | 1138.4979                        | 1138.5045   | 0.0066  | 6     | 473        | 481      | CCTESLVNR                 |             |                         | Carbamidomethyl (C)[1,2]                 |        |      | Mascot      |     |     |  |  |  |  |
|   | 1163.6306                        | 1163.6217   | -0.0089 | -8    | 42         | 51       | LVNLETEFAK                |             |                         |                                          |        |      | Mascot      |     |     |  |  |  |  |
|   | 1249.6211                        | 1249.6157   | -0.0054 | -4    | 11         | 20       | FKDLGEEHFK                |             |                         |                                          |        |      | Mascot      |     |     |  |  |  |  |
|   | 1283.7106                        | 1283.7174   | 0.0068  | 5     | 336        | 346      | HPEYAVSVLLR               |             |                         |                                          |        |      | Mascot      |     |     |  |  |  |  |
|   | 1305.7161                        | 1305.7102   | -0.0059 | -5    | 377        | 387      | HLVDEPNLIK                |             |                         |                                          |        |      | Mascot      |     |     |  |  |  |  |
|   | 1419.6936                        | 1419.6892   | -0.0044 | -3    | 65         | 76       | SLHTLFGDELCK              |             |                         | Carbamidomethyl (C)[11]                  |        |      | Mascot      |     |     |  |  |  |  |
|   | 1439.8118                        | 1439.8123   | 0.0005  | 0     | 335        | 346      | RHPEYAVSVLLR              |             |                         |                                          |        |      | Mascot      |     |     |  |  |  |  |
|   | 1439.8118                        | 1439.8123   | 0.0005  | 0     | 335        | 346      | RHPEYAVSVLLR              | 77          | 99.99                   |                                          |        |      | Mascot      |     |     |  |  |  |  |
|   | 1567.7427                        | 1567.7485   | 0.0058  | 4     | 322        | 334      | DAFLGSFLYEYSR             | 130         | 100                     |                                          |        |      | Mascot      |     |     |  |  |  |  |
|   | 1567.7427                        | 1567.7485   | 0.0058  | 4     | 322        | 334      | DAFLGSFLYEYSR             |             |                         |                                          |        |      | Mascot      |     |     |  |  |  |  |
|   | 1639.9377                        | 1639.9451   | 0.0074  | 5     | 411        | 425      | KVPQVSTPTLVEYSR           |             |                         |                                          |        |      | Mascot      |     |     |  |  |  |  |
|   | 1724.8346                        | 1724.842    | 0.0074  | 4     | 443        | 456      | MPCTEDYLSILNR             |             |                         | Carbamidomethyl (C)[3]                   |        |      | Mascot      |     |     |  |  |  |  |
|   | 1724.8346                        | 1724.842    | 0.0074  | 4     | 443        | 456      | MPCTEDYLSILNR             | 97          | 100                     | Carbamidomethyl (C)[3]                   |        |      | Mascot      |     |     |  |  |  |  |
|   | 1740.8295                        | 1740.8284   | -0.0011 | -1    | 443        | 456      | MPCTEDYLSILNR             |             |                         | Carbamidomethyl (C)[3], Oxidation (M)[1] |        |      | Mascot      |     |     |  |  |  |  |
|   | 1880.9211                        | 1880.927    | 0.0059  | 3     | 482        | 497      | RPCFSALTPDEYVPK           | 80          | 99.995                  | Carbamidomethyl (C)[3]                   |        |      | Mascot      |     |     |  |  |  |  |
|   | 1880.9211                        | 1880.927    | 0.0059  | 3     | 482        | 497      | RPCFSALTPDEYVPK           |             |                         | Carbamidomethyl (C)[3]                   |        |      | Mascot      |     |     |  |  |  |  |
|   | 1888.9949                        | 1888.9346   | -0.0603 | -32   | 65         | 81       | SLHTFGDELCKVASLR          |             |                         |                                          |        |      | Mascot      |     |     |  |  |  |  |
|   | 1907.9208                        | 1907.921    | 0.0002  | 0     | 503        | 518      | LFTFHADICTLPDTEK          |             |                         | Carbamidomethyl (C)[9]                   |        |      | Mascot      |     |     |  |  |  |  |
|   | 1927.7982                        | 1927.8042   | 0.006   | 3     | 555        | 571      | CCAADKCAQFAVEGPK          |             |                         | Carbamidomethyl (C)[1,2,10]              |        |      | Mascot      |     |     |  |  |  |  |
|   | 2019.9691                        | 2019.976    | 0.0069  | 3     | 115        | 131      | LKPDNTLCDEFKADEK          |             |                         | Carbamidomethyl (C)[9]                   |        |      | Mascot      |     |     |  |  |  |  |
|   | 2247.9426                        | 2247.9531   | 0.0105  | 5     | 242        | 260      | ECCHGDLLECADDRADL<br>AK   |             |                         | Carbamidomethyl (C)[2,3,10]              |        |      | Mascot      |     |     |  |  |  |  |
|   | 2492.2642                        | 2492.2686   | 0.0044  | 2     | 21         | 41       | GLVLIAFSQYLQQCPFDE<br>HVK |             |                         | Carbamidomethyl (C)[14]                  |        |      | Mascot      |     |     |  |  |  |  |
| 5 | ALB protein [Bos taurus]         |             |         |       |            |          |                           | g 154425704 | 69248.5                 | 5.95                                     | 20     | 546  | 100         | 411 | 100 |  |  |  |  |
|   | Peptide Information              |             |         |       |            |          |                           |             |                         |                                          |        |      |             |     |     |  |  |  |  |
|   | Calc. Mass                       | Obsrv. Mass | ± da    | ± ppm | Start Seq. | End Seq. | Sequence                  | Ion Score   | C. I. %                 | Modification                             |        | Rank | Result Type |     |     |  |  |  |  |
|   | 927.4934                         | 927.491     | -0.0024 | -3    | 161        | 167      | YLVEIAR                   | 44          | 80.184                  |                                          |        |      | Mascot      |     |     |  |  |  |  |
|   | 927.4934                         | 927.491     | -0.0024 | -3    | 161        | 167      | YLVEIAR                   |             |                         |                                          |        |      | Mascot      |     |     |  |  |  |  |
|   | 1138.4979                        | 1138.5045   | 0.0066  | 6     | 499        | 507      | CCTESLVNR                 |             |                         | Carbamidomethyl (C)[1,2]                 |        |      | Mascot      |     |     |  |  |  |  |
|   | 1163.6306                        | 1163.6217   | -0.0089 | -8    | 66         | 75       | LVNLETEFAK                |             |                         |                                          |        |      | Mascot      |     |     |  |  |  |  |
|   | 1249.6211                        | 1249.6157   | -0.0054 | -4    | 35         | 44       | FKDLGEEHFK                |             |                         |                                          |        |      | Mascot      |     |     |  |  |  |  |
|   | 1283.7106                        | 1283.7174   | 0.0068  | 5     | 361        | 371      | HPEYAVSVLLR               |             |                         |                                          |        |      | Mascot      |     |     |  |  |  |  |
|   | 1305.7161                        | 1305.7102   | -0.0059 | -5    | 402        | 412      | HLVDEPNLIK                |             |                         |                                          |        |      | Mascot      |     |     |  |  |  |  |
|   | 1419.6936                        | 1419.6892   | -0.0044 | -3    | 89         | 100      | SLHTFGDELCK               |             |                         | Carbamidomethyl (C)[11]                  |        |      | Mascot      |     |     |  |  |  |  |
|   | 1439.8118                        | 1439.8123   | 0.0005  | 0     | 360        | 371      | RHPEYAVSVLLR              |             |                         |                                          |        |      | Mascot      |     |     |  |  |  |  |
|   | 1439.8118                        | 1439.8123   | 0.0005  | 0     | 360        | 371      | RHPEYAVSVLLR              | 77          | 99.99                   |                                          |        |      | Mascot      |     |     |  |  |  |  |
|   | 1537.8009                        | 1537.8083   | 0.0074  | 5     | 421        | 433      | LGEYGFQNELIVR             |             |                         |                                          |        |      | Mascot      |     |     |  |  |  |  |
|   | 1567.7427                        | 1567.7485   | 0.0058  | 4     | 347        | 359      | DAFLGSFLYEYSR             | 130         | 100                     |                                          |        |      | Mascot      |     |     |  |  |  |  |
|   | 1567.7427                        | 1567.7485   | 0.0058  | 4     | 347        | 359      | DAFLGSFLYEYSR             |             |                         |                                          |        |      | Mascot      |     |     |  |  |  |  |
|   | 1639.9377                        | 1639.9451   | 0.0074  | 5     | 437        | 451      | KVPQVSTPTLVEYSR           |             |                         |                                          |        |      | Mascot      |     |     |  |  |  |  |
|   | 1694.824                         | 1694.8257   | 0.0027  | 2     | 469        | 482      | MPCAEDYLSILNR             |             |                         | Carbamidomethyl (C)[3]                   |        |      | Mascot      |     |     |  |  |  |  |
|   | 1710.819                         | 1710.8236   | 0.0046  | 3     | 469        | 482      | MPCAEDYLSILNR             |             |                         | Carbamidomethyl (C)[3], Oxidation (M)[1] |        |      | Mascot      |     |     |  |  |  |  |
|   | 1880.9211                        | 1880.927    | 0.0059  | 3     | 508        | 523      | RPCFSALTPDEYVPK           | 80          | 99.995                  | Carbamidomethyl (C)[3]                   |        |      | Mascot      |     |     |  |  |  |  |
|   | 1880.9211                        | 1880.927    | 0.0059  | 3     | 508        | 523      | RPCFSALTPDEYVPK           |             |                         | Carbamidomethyl (C)[3]                   |        |      | Mascot      |     |     |  |  |  |  |
|   | 1888.9269                        | 1888.9346   | 0.0077  | 4     | 169        | 183      | HPYFYAPELLYANK            |             |                         |                                          |        |      | Mascot      |     |     |  |  |  |  |
|   |                                  | 1888.9346   |         |       |            |          |                           |             |                         |                                          |        |      | Mascot      |     |     |  |  |  |  |
|   | 1907.9208                        | 1907.921    | 0.0002  | 0     | 529        | 544      | LFTFHADICTLPDTEK          |             |                         | Carbamidomethyl (C)[9]                   |        |      | Mascot      |     |     |  |  |  |  |
|   | 1927.7982                        | 1927.8042   | 0.006   | 3     | 581        | 597      | CCAADKCAQFAVEGPK          |             |                         | Carbamidomethyl (C)[1,2,10]              |        |      | Mascot      |     |     |  |  |  |  |
|   | 2019.9691                        | 2019.976    | 0.0069  | 3     | 139        | 155      | LKPDNTLCDEFKADEK          |             |                         | Carbamidomethyl (C)[9]                   |        |      | Mascot      |     |     |  |  |  |  |
|   | 2045.028                         | 2045.0348   | 0.0068  | 3     | 168        | 183      | RHPYFYAPELLYANK           | 80          | 99.996                  |                                          |        |      | Mascot      |     |     |  |  |  |  |
|   | 2045.028                         | 2045.0348   | 0.0068  | 3     | 168        | 183      | RHPYFYAPELLYANK           |             |                         |                                          |        |      | Mascot      |     |     |  |  |  |  |
|   | 2247.9426                        | 2247.9531   | 0.0105  | 5     | 267        | 285      | ECCHGDLLECADDRADL<br>AK   |             |                         | Carbamidomethyl (C)[2,3,10]              |        |      | Mascot      |     |     |  |  |  |  |
|   | 2492.2642                        | 2492.2686   | 0.0044  | 2     | 45         | 65       | GLVLIAFSQYLQQCPFDE<br>HVK |             |                         | Carbamidomethyl (C)[14]                  |        |      | Mascot      |     |     |  |  |  |  |
| 6 | albumin precursor [Capra hircus] |             |         |       |            |          |                           | g 193085052 | 66269.8                 | 5.58                                     | 14     | 330  | 100         | 254 | 100 |  |  |  |  |
|   | Peptide Information              |             |         |       |            |          |                           |             |                         |                                          |        |      |             |     |     |  |  |  |  |
|   | Calc. Mass                       | Obsrv. Mass | ± da    | ± ppm | Start Seq. | End Seq. | Sequence                  | Ion Score   | C. I. %                 | Modification                             |        | Rank | Result Type |     |     |  |  |  |  |
|   | 939.424                          | 939.5244    | 0.1004  | 107   | 390        | 396      | NCELFKE                   |             |                         | Carbamidomethyl (C)[2]                   |        |      | Mascot      |     |     |  |  |  |  |
|   | 1138.4979                        | 1138.5045   | 0.0066  | 6     | 475        | 483      | CCTESLVNR                 |             |                         | Carbamidomethyl (C)[1,2]                 |        |      | Mascot      |     |     |  |  |  |  |
|   | 1149.5608                        | 1149.4774   | -0.0834 | -73   | 564        | 573      | EGCFLLEGPK                |             |                         | Carbamidomethyl (C)[3]                   |        |      | Mascot      |     |     |  |  |  |  |
|   | 1163.5435                        | 1163.6217   | 0.0782  | 67    | 276        | 285      | ECCDKPVLEK                |             |                         |                                          |        |      | Mascot      |     |     |  |  |  |  |
|   | 1283.7106                        | 1283.7174   | 0.0068  | 5     | 361        | 371      | HPEYAVSVLLR               |             |                         |                                          |        |      | Mascot      |     |     |  |  |  |  |
|   | 1305.7161                        | 1305.7102   | -0.0059 | -5    | 378        | 388      | HLVDEPNLIK                |             |                         |                                          |        |      | Mascot      |     |     |  |  |  |  |
|   | 1419.6936                        | 1419.6892   | -0.0044 | -3    | 65         | 76       | SLHTLFGDELCK              |             |                         | Carbamidomethyl (C)[11]                  |        |      | Mascot      |     |     |  |  |  |  |
|   | 1439.8118                        | 1439.8123   | 0.0005  | 0     | 336        | 347      | RHPEYAVSVLLR              |             |                         |                                          |        |      | Mascot      |     |     |  |  |  |  |
|   | 1439.8118                        | 1439.8123   | 0.0005  | 0     | 336        | 347      | RHPEYAVSVLLR              | 77          | 99.99                   |                                          |        |      | Mascot      |     |     |  |  |  |  |
|   | 1724.8346                        | 1724.842    | 0.0074  | 4     | 445        | 458      | MPCTEDYLSILNR             |             |                         | Carbamidomethyl (C)[3]                   |        |      | Mascot      |     |     |  |  |  |  |
|   | 1724.8346                        | 1724.842    | 0.0074  | 4     | 445        | 458      | MPCTEDYLSILNR             | 97          | 100                     | Carbamidomethyl (C)[3]                   |        |      | Mascot      |     |     |  |  |  |  |
|   | 1740.8295                        | 1740.8284   | -0.0011 | -1    | 445        | 458      | MPCTEDYLSILNR             |             |                         | Carbamidomethyl (C)[3], Oxidation (M)[1] |        |      | Mascot      |     |     |  |  |  |  |
|   | 1888.9269                        | 1888.9346   | 0.0077  | 4     | 145        | 159      | HPYFYAPELLYANK            |             |                         |                                          |        |      | Mascot      |     |     |  |  |  |  |
|   | 1907.9167                        | 1907.921    | 0.0043  | 2     | 257        | 273      | ADLAKYICDHQDTLSSK         |             |                         |                                          |        |      | Mascot      |     |     |  |  |  |  |
|   |                                  |             |         |       |            |          |                           |             |                         |                                          |        |      |             |     |     |  |  |  |  |

|             |                                                                                                  |             |         |       |               |                                   |                             |           |                        |                             |                |               |                    |               |                   |  |
|-------------|--------------------------------------------------------------------------------------------------|-------------|---------|-------|---------------|-----------------------------------|-----------------------------|-----------|------------------------|-----------------------------|----------------|---------------|--------------------|---------------|-------------------|--|
|             | 2665.2168                                                                                        | 2665.2871   | 0.0703  | 26    | 461           | AK<br>CCTHPEAERLSCAEDYL<br>SVVLNR | 483                         |           | Carbamidomethyl (C)[1] |                             | Mascot         |               |                    |               |                   |  |
| 9           | albumin [Felis catus]                                                                            |             |         |       |               |                                   | gi 30962111                 | 65866.3   | 5.23                   | 7                           | 166            |               | 100                | 144           | 100               |  |
|             | Peptide Information                                                                              |             |         |       |               |                                   |                             |           |                        |                             |                |               |                    |               |                   |  |
|             | Calc. Mass                                                                                       | Obsrv. Mass | ± da    | ± ppm | Start Seq.    | End Seq.                          | Sequence                    | Ion Score | C. I. %                | Modification                |                | Rank          | Result Type        |               |                   |  |
|             | 927.4934                                                                                         | 927.491     | -0.0024 | -3    | 138           | 144                               | YLVEIAR                     | 44        | 80.184                 |                             |                |               | Mascot             |               |                   |  |
|             | 927.4934                                                                                         | 927.491     | -0.0024 | -3    | 159           | 165                               | YLVEIAR                     |           |                        |                             |                |               | Mascot             |               |                   |  |
|             | 927.4934                                                                                         | 927.491     | -0.0024 | -3    | 138           | 144                               | YLVEIAR                     |           |                        |                             |                |               | Mascot             |               |                   |  |
|             | 1138.4979                                                                                        | 1138.5045   | 0.0066  | 6     | 476           | 484                               | CCTESLVNR                   |           |                        | Carbamidomethyl (C)[1,2]    |                |               | Mascot             |               |                   |  |
|             | 1479.7954                                                                                        | 1479.7986   | 0.0032  | 2     | 398           | 410                               | LGEYGFQNALIVR               |           |                        |                             |                |               | Mascot             |               |                   |  |
|             | 1479.7954                                                                                        | 1479.7986   | 0.0032  | 2     | 398           | 410                               | LGEYGFQNALIVR               | 100       | 100                    |                             |                |               | Mascot             |               |                   |  |
|             | 1567.826                                                                                         | 1567.7485   | -0.0775 | -49   | 460           | 472                               | LCVLHEKTPVSR                |           |                        | Carbamidomethyl (C)[2]      |                |               | Mascot             |               |                   |  |
|             | 1567.826                                                                                         | 1567.7485   | -0.0775 | -49   | 460           | 472                               | LCVLHEKTPVSR                |           |                        | Carbamidomethyl (C)[2]      |                |               | Mascot             |               |                   |  |
|             | 1639.9377                                                                                        | 1639.9451   | 0.0074  | 5     | 414           | 428                               | KVPOVSTPTLVEVSR             |           |                        |                             |                |               | Mascot             |               |                   |  |
|             | 1888.9949                                                                                        | 1888.9346   | -0.0603 | -32   | 65            | 81                                | SLHELFGDKLCTVASLR           |           |                        |                             |                |               | Mascot             |               |                   |  |
|             | 2665.2168                                                                                        | 2665.2871   | 0.0703  | 26    | 437           | 459                               | CCTHPEAERLSCAEDYL<br>SVVLNR |           |                        | Carbamidomethyl (C)[1]      |                |               | Mascot             |               |                   |  |
| 10          | albumin [Sus scrofa]                                                                             |             |         |       |               |                                   | gi 833798                   | 69365.9   | 5.92                   | 7                           | 164            |               | 100                | 144           | 100               |  |
|             | Peptide Information                                                                              |             |         |       |               |                                   |                             |           |                        |                             |                |               |                    |               |                   |  |
|             | Calc. Mass                                                                                       | Obsrv. Mass | ± da    | ± ppm | Start Seq.    | End Seq.                          | Sequence                    | Ion Score | C. I. %                | Modification                |                | Rank          | Result Type        |               |                   |  |
|             | 927.4934                                                                                         | 927.491     | -0.0024 | -3    | 159           | 165                               | YLVEIAR                     | 44        | 80.184                 |                             |                |               | Mascot             |               |                   |  |
|             | 927.4934                                                                                         | 927.491     | -0.0024 | -3    | 159           | 165                               | YLVEIAR                     |           |                        |                             |                |               | Mascot             |               |                   |  |
|             | 1138.4979                                                                                        | 1138.5045   | 0.0066  | 6     | 497           | 505                               | CCTESLVNR                   |           |                        | Carbamidomethyl (C)[1,2]    |                |               | Mascot             |               |                   |  |
|             | 1149.5139                                                                                        | 1149.4774   | -0.0365 | -32   | 458           | 466                               | CKKRPEER                    |           |                        |                             |                |               | Mascot             |               |                   |  |
|             | 1479.7954                                                                                        | 1479.7986   | 0.0032  | 2     | 419           | 431                               | LGEYGFQNALIVR               |           |                        |                             |                |               | Mascot             |               |                   |  |
|             | 1479.7954                                                                                        | 1479.7986   | 0.0032  | 2     | 419           | 431                               | LGEYGFQNALIVR               | 100       | 100                    |                             |                |               | Mascot             |               |                   |  |
|             | 1928.0422                                                                                        | 1927.8042   | -0.238  | -123  | 87            | 103                               | SIHTLFGDKLCAIPSLR           |           |                        | Carbamidomethyl (C)[11]     |                |               | Mascot             |               |                   |  |
|             | 2247.9426                                                                                        | 2247.9531   | 0.0105  | 5     | 265           | 283                               | ECCHGDDLECCADDRDL           |           |                        | Carbamidomethyl (C)[2,3,10] |                |               | Mascot             |               |                   |  |
|             |                                                                                                  |             |         |       |               |                                   | AK                          |           |                        |                             |                |               |                    |               |                   |  |
|             | 2612.2185                                                                                        | 2612.1721   | -0.0464 | -18   | 317           | 338                               | DELPADLNPLEHDFVEDK<br>EVCK  |           |                        | Carbamidomethyl (C)[21]     |                |               | Mascot             |               |                   |  |
| Gel Idx/Pos | 35/B17                                                                                           |             |         |       |               |                                   | Instr./Gel Origin           |           | AB4700/110211A         |                             | Process Status |               | Analysis Succeeded |               |                   |  |
| Plate [#]   | [1] 8907                                                                                         |             |         |       |               |                                   | Instrument Sample Name      |           |                        |                             | Spectra        |               | 8                  |               |                   |  |
| Rank        | Protein Name                                                                                     |             | Species |       | Accession No. |                                   | Protein MW                  |           | Protein                | Pep. Count                  | Protein Score  | Protein Score | Protein C. I. %    | Protein Score | Total Ion C. I. % |  |
| 1           | PREDICTED: mitochondrial phosphoenolpyruvate carboxykinase 2 isoform 1 [Bos taurus]              |             |         |       | gi 194670361  |                                   | 70604.7                     |           | 8.14                   | 13                          | 185            |               | 100                | 107           | 100               |  |
|             | Peptide Information                                                                              |             |         |       |               |                                   |                             |           |                        |                             |                |               |                    |               |                   |  |
|             | Calc. Mass                                                                                       | Obsrv. Mass | ± da    | ± ppm | Start Seq.    | End Seq.                          | Sequence                    | Ion Score | C. I. %                | Modification                |                | Rank          | Result Type        |               |                   |  |
|             | 961.4924                                                                                         | 961.4848    | -0.0076 | -8    | 554           | 560                               | VLDWICR                     |           |                        | Carbamidomethyl (C)[6]      |                |               | Mascot             |               |                   |  |
|             | 1067.4688                                                                                        | 1067.5835   | 0.1147  | 107   | 415           | 423                               | EPCAHPNSR                   |           |                        | Carbamidomethyl (C)[3]      |                |               | Mascot             |               |                   |  |
|             | 1096.4993                                                                                        | 1096.5012   | 0.0019  | 2     | 89            | 96                                | YNNCWILAR                   |           |                        | Carbamidomethyl (C)[4]      |                |               | Mascot             |               |                   |  |
|             | 1118.5894                                                                                        | 1118.5875   | -0.0019 | -2    | 529           | 536                               | IFHVNWFR                    | 28        | 0                      |                             |                |               | Mascot             |               |                   |  |
|             | 1118.5894                                                                                        | 1118.5875   | -0.0019 | -2    | 529           | 536                               | IFHVNWFR                    |           |                        |                             |                |               | Mascot             |               |                   |  |
|             | 1135.6218                                                                                        | 1135.6116   | -0.0102 | -9    | 235           | 244                               | TLGHVPDQR                   |           |                        |                             |                |               | Mascot             |               |                   |  |
|             | 1293.6375                                                                                        | 1293.6394   | 0.0019  | 1     | 543           | 553                               | FLWPQFGENAR                 |           |                        |                             |                |               | Mascot             |               |                   |  |
|             | 1293.6375                                                                                        | 1293.6394   | 0.0019  | 1     | 543           | 553                               | FLWPQFGENAR                 | 46        | 87.659                 |                             |                |               | Mascot             |               |                   |  |
|             | 1328.7056                                                                                        | 1328.7001   | -0.0055 | -4    | 625           | 636                               | EVLAELEALEGR                |           |                        |                             |                |               | Mascot             |               |                   |  |
|             | 1420.6678                                                                                        | 1420.6764   | 0.0086  | 6     | 511           | 521                               | YLEHWLSMEGR                 |           |                        |                             |                |               | Mascot             |               |                   |  |
|             | 1450.7477                                                                                        | 1450.7394   | -0.0083 | -6    | 458           | 469                               | GVPLVYEAFNWR                |           |                        |                             |                |               | Mascot             |               |                   |  |
|             | 1450.7477                                                                                        | 1450.7394   | -0.0083 | -6    | 458           | 469                               | GVPLVYEAFNWR                | 34        | 0                      |                             |                |               | Mascot             |               |                   |  |
|             | 1472.6917                                                                                        | 1472.6954   | 0.0037  | 3     | 601           | 611                               | DFWQOEVDHIR                 |           |                        |                             |                |               | Mascot             |               |                   |  |
|             | 1537.7216                                                                                        | 1537.8051   | 0.0835  | 54    | 89            | 100                               | YNNCWILARTDPK               |           |                        | Carbamidomethyl (C)[4]      |                |               | Mascot             |               |                   |  |
|             | 1725.884                                                                                         | 1725.8315   | -0.0525 | -30   | 174           | 189                               | IGVQLTDSAYYVASMRR           |           |                        | Oxidation (M)[15]           |                |               | Mascot             |               |                   |  |
|             | 2211.1624                                                                                        | 2211.0916   | -0.0708 | -32   | 174           | 193                               | IGVQLTDSAYYVASMRRIM         |           |                        |                             |                |               | Mascot             |               |                   |  |
|             |                                                                                                  |             |         |       |               |                                   | TR                          |           |                        |                             |                |               |                    |               |                   |  |
| 2           | PREDICTED: phosphoenolpyruvate carboxykinase [GTP], mitochondrial isoform 1 [Callithrix jacchus] |             |         |       | gi 296214608  |                                   | 70740.7                     |           | 7.58                   | 12                          | 178            |               | 100                | 107           | 100               |  |
|             | Peptide Information                                                                              |             |         |       |               |                                   |                             |           |                        |                             |                |               |                    |               |                   |  |
|             | Calc. Mass                                                                                       | Obsrv. Mass | ± da    | ± ppm | Start Seq.    | End Seq.                          | Sequence                    | Ion Score | C. I. %                | Modification                |                | Rank          | Result Type        |               |                   |  |
|             | 961.4924                                                                                         | 961.4848    | -0.0076 | -8    | 554           | 560                               | VLDWICR                     |           |                        | Carbamidomethyl (C)[6]      |                |               | Mascot             |               |                   |  |
|             | 1067.4688                                                                                        | 1067.5835   | 0.1147  | 107   | 415           | 423                               | EPCAHPNSR                   |           |                        | Carbamidomethyl (C)[3]      |                |               | Mascot             |               |                   |  |
|             | 1096.4993                                                                                        | 1096.5012   | 0.0019  | 2     | 89            | 96                                | YNNCWILAR                   |           |                        | Carbamidomethyl (C)[4]      |                |               | Mascot             |               |                   |  |
|             | 1118.5894                                                                                        | 1118.5875   | -0.0019 | -2    | 529           | 536                               | IFHVNWFR                    | 28        | 0                      |                             |                |               | Mascot             |               |                   |  |
|             | 1118.5894                                                                                        | 1118.5875   | -0.0019 | -2    | 529           | 536                               | IFHVNWFR                    |           |                        |                             |                |               | Mascot             |               |                   |  |
|             | 1135.6218                                                                                        | 1135.6116   | -0.0102 | -9    | 235           | 244                               | TLGHVPDQR                   |           |                        |                             |                |               | Mascot             |               |                   |  |
|             | 1163.6354                                                                                        | 1163.5865   | -0.0489 | -42   | 1             | 10                                | MAALYRPQLR                  |           |                        | Oxidation (M)[1]            |                |               | Mascot             |               |                   |  |
|             | 1163.6354                                                                                        | 1163.5865   | -0.0489 | -42   | 1             | 10                                | MAALYRPQLR                  |           |                        | Oxidation (M)[1]            |                |               | Mascot             |               |                   |  |
|             | 1293.6375                                                                                        | 1293.6394   | 0.0019  | 1     | 543           | 553                               | FLWPQFGENAR                 |           |                        |                             |                |               | Mascot             |               |                   |  |
|             | 1293.6375                                                                                        | 1293.6394   | 0.0019  | 1     | 543           | 553                               | FLWPQFGENAR                 | 46        | 87.659                 |                             |                |               | Mascot             |               |                   |  |
|             | 1450.7477                                                                                        | 1450.7394   | -0.0083 | -6    | 458           | 469                               | GVPLVYEAFNWR                |           |                        |                             |                |               | Mascot             |               |                   |  |
|             | 1450.7477                                                                                        | 1450.7394   | -0.0083 | -6    | 458           | 469                               | GVPLVYEAFNWR                | 34        | 0                      |                             |                |               | Mascot             |               |                   |  |
|             | 1522.689                                                                                         | 1522.7644   | 0.0754  | 50    | 143           | 155                               | AVDERFPGCMQGR               |           |                        | Carbamidomethyl (C)[9]      |                |               | Mascot             |               |                   |  |
|             | 1537.7216                                                                                        | 1537.8051   | 0.0835  | 54    | 89            | 100                               | YNNCWILARTDPK               |           |                        | Carbamidomethyl (C)[4]      |                |               | Mascot             |               |                   |  |
|             | 1725.884                                                                                         | 1725.8315   | -0.0525 | -30   | 174           | 189                               | IGVQLTDSAYYVASMRR           |           |                        | Oxidation (M)[15]           |                |               | Mascot             |               |                   |  |
|             | 2211.1624                                                                                        | 2211.0916   | -0.0708 | -32   | 174           | 193                               | IGVQLTDSAYYVASMRRIM         |           |                        |                             |                |               | Mascot             |               |                   |  |
|             |                                                                                                  |             |         |       |               |                                   | TR                          |           |                        |                             |                |               |                    |               |                   |  |
| 3           | RecName: Full=Serum albumin; AltName: Full=BSA; AltName: Allergen=Bos d 6; Flags: Precursor      |             |         |       | gi 1351907    |                                   | 69248.4                     |           | 5.82                   | 12                          | 167            |               | 100                | 115           | 100               |  |
|             | Peptide Information                                                                              |             |         |       |               |                                   |                             |           |                        |                             |                |               |                    |               |                   |  |
|             | Calc. Mass                                                                                       | Obsrv. Mass | ± da    | ± ppm | Start Seq.    | End Seq.                          | Sequence                    | Ion Score | C. I. %                | Modification                |                | Rank          | Result Type        |               |                   |  |
|             | 927.4934                                                                                         | 927.4922    | -0.0012 | -1    | 161           | 167                               | YLVEIAR                     |           |                        |                             |                |               | Mascot             |               |                   |  |
|             | 1163.6306                                                                                        | 1163.5865   | -0.0441 | -38   | 66            | 75                                | LVNELTEFAK                  |           |                        |                             |                |               | Mascot             |               |                   |  |
|             | 1163.6306                                                                                        | 1163.5865   | -0.0441 | -38   | 66            | 75                                | LVNELTEFAK                  |           |                        |                             |                |               | Mascot             |               |                   |  |
|             | 1352.666                                                                                         | 1352.7119   | 0.0459  | 34    | 496           | 507                               | VTKCTESLVNR                 |           |                        |                             |                |               | Mascot             |               |                   |  |
|             | 1439.8118                                                                                        | 1439.8108   | -0.001  | -1    | 360           | 371                               | RHPEYAVSVILR                |           |                        |                             |                |               | Mascot             |               |                   |  |
|             | 1479.7954                                                                                        | 1479.7935   | -0.0019 | -1    | 421           | 433                               | LGEYGFQNALIVR               |           |                        |                             |                |               | Mascot             |               |                   |  |
|             | 1479.7954                                                                                        | 1479.7935   | -0.0019 | -1    | 421           | 433                               | LGEYGFQNALIVR               | 43        | 76.485                 |                             |                |               | Mascot             |               |                   |  |
|             | 1522.7101                                                                                        | 1522.7644   | 0.0543  | 36    | 456           | 468                               | VGTRCCTKPESER               |           |                        | Carbamidomethyl (C)[5]      |                |               | Mascot             |               |                   |  |
|             | 1539.8199                                                                                        | 1539.795    | -0.0249 | -16   | 483           | 495                               | LCVLHEKTPVSEK               |           |                        | Carbamidomethyl (C)[2]      |                |               | Mascot             |               |                   |  |
|             | 1567.7427                                                                                        | 1567.7411   | -0.0016 | -1    | 347           | 359                               | DAFLGSFLVEYSR               |           |                        |                             |                |               | Mascot             |               |                   |  |
|             | 1567.7427                                                                                        | 1567.7411   | -0.0016 | -1    | 347           | 359                               | DAFLGSFLVEYSR               | 58        | 99.169                 |                             |                |               | Mascot             |               |                   |  |
|             | 1639.9377                                                                                        | 1639.9337   | -0.004  | -2    | 437           | 451                               | KVPOVSTPTLVEVSR             |           |                        |                             |                |               | Mascot             |               |                   |  |
|             | 1724.8346                                                                                        | 1724.8323   | -0.0023 | -1    | 469           | 482                               | MPCTEDYLSILNR               |           |                        | Carbamidomethyl (C)[3]      |                |               | Mascot             |               |                   |  |
|             | 1880.9211                                                                                        | 1880.9138   | -0.0073 | -4    | 508           | 523                               | RPCFSALTPDETYVPK            |           |                        | Carbamidomethyl (C)[3]      |                |               | Mascot             |               |                   |  |
|             |                                                                                                  |             |         |       |               |                                   |                             |           |                        |                             |                |               |                    |               |                   |  |

|                     |                                                                                                     |                        |                        |                    |            |          |                   |                                       |                    |                        |            |                |                |           |                    |           |                   |     |
|---------------------|-----------------------------------------------------------------------------------------------------|------------------------|------------------------|--------------------|------------|----------|-------------------|---------------------------------------|--------------------|------------------------|------------|----------------|----------------|-----------|--------------------|-----------|-------------------|-----|
|                     |                                                                                                     | 1725.884<br>2211.1624  | 1725.8315<br>2211.0916 | -0.0625<br>-0.0708 | -30<br>-32 | 40<br>40 | 55<br>59          | IGVQLTDSAYYVASMR<br>IGVQLTDSAYYVASMRI | Oxidation [M]I[15] | Mascot<br>Mascot       |            |                |                |           |                    |           |                   |     |
| 5                   | phosphoenolpyruvate carboxykinase [GTP], mitochondrial [Mus musculus]                               | gjl 28077029           |                        |                    |            |          |                   |                                       |                    |                        |            | 73371          | 7.88           | 11        | 166                | 100       | 107               | 100 |
| Peptide Information |                                                                                                     |                        |                        |                    |            |          |                   |                                       |                    |                        |            |                |                |           |                    |           |                   |     |
|                     | Calc. Mass                                                                                          | Obsrv. Mass            | ± da                   | ± ppm              | Start Seq. | End Seq. | Sequence          | Ion Score                             | C. I. %            | Modification           |            | Rank           | Result Type    |           |                    |           |                   |     |
|                     | 961.4924                                                                                            | 961.4848               | -0.0076                | -8                 | 581        | 587      | VLDWICR           |                                       |                    | Carbamidomethyl (C)[6] |            |                | Mascot         |           |                    |           |                   |     |
|                     | 1067.4688                                                                                           | 1067.5835              | 0.1147                 | 107                | 442        | 450      | EPCAHPNSR         |                                       |                    | Carbamidomethyl (C)[3] |            |                | Mascot         |           |                    |           |                   |     |
|                     | 1118.5894                                                                                           | 1118.5875              | -0.0019                | -2                 | 556        | 563      | IFHNWNFR          | 28                                    | 0                  |                        |            |                | Mascot         |           |                    |           |                   |     |
|                     | 1118.5894                                                                                           | 1118.5875              | -0.0019                | -2                 | 556        | 563      | IFHNWNFR          |                                       |                    |                        |            |                | Mascot         |           |                    |           |                   |     |
|                     | 1135.6218                                                                                           | 1135.6116              | -0.0102                | -9                 | 262        | 271      | TLGHVPDQR         |                                       |                    |                        |            |                | Mascot         |           |                    |           |                   |     |
|                     | 1163.6783                                                                                           | 1163.5865              | -0.0918                | -79                | 2          | 12       | LLPSPSLSPR        |                                       |                    |                        |            |                | Mascot         |           |                    |           |                   |     |
|                     | 1163.6783                                                                                           | 1163.5865              | -0.0918                | -79                | 2          | 12       | LLPSPSLSPR        |                                       |                    |                        |            |                | Mascot         |           |                    |           |                   |     |
|                     | 1293.6375                                                                                           | 1293.6394              | 0.0019                 | 1                  | 570        | 580      | FLWPFGGENAR       |                                       |                    |                        |            |                | Mascot         |           |                    |           |                   |     |
|                     | 1293.6375                                                                                           | 1293.6394              | 0.0019                 | 1                  | 570        | 580      | FLWPFGGENAR       | 46                                    | 87.659             |                        |            |                | Mascot         |           |                    |           |                   |     |
|                     | 1328.7056                                                                                           | 1328.7001              | -0.0055                | -4                 | 652        | 663      | EVLALEALEGR       |                                       |                    |                        |            |                | Mascot         |           |                    |           |                   |     |
|                     | 1450.7477                                                                                           | 1450.7394              | -0.0083                | -6                 | 485        | 496      | GVPLVEAFNWR       |                                       |                    |                        |            |                | Mascot         |           |                    |           |                   |     |
|                     | 1450.7477                                                                                           | 1450.7394              | -0.0083                | -6                 | 485        | 496      | GVPLVEAFNWR       | 34                                    | 0                  |                        |            |                | Mascot         |           |                    |           |                   |     |
|                     | 1522.689                                                                                            | 1522.7644              | 0.0754                 | 50                 | 170        | 182      | AVDERPFGCMQGR     |                                       |                    | Carbamidomethyl (C)[9] |            |                | Mascot         |           |                    |           |                   |     |
|                     | 1725.884                                                                                            | 1725.8315              | -0.0525                | -30                | 201        | 216      | IGVQLTDSAYYVASMR  |                                       |                    | Oxidation [M]I[15]     |            |                | Mascot         |           |                    |           |                   |     |
|                     | 2211.1624                                                                                           | 2211.0916              | -0.0708                | -32                | 201        | 220      | IGVQLTDSAYYVASMRI |                                       |                    |                        |            |                | Mascot         |           |                    |           |                   |     |
| 6                   | phosphoenolpyruvate carboxykinase 2 (mitochondrial), isoform CRA_c [Mus musculus]                   | gjl 148704344          |                        |                    |            |          |                   |                                       |                    |                        |            | 70368.4        | 7.88           | 11        | 164                | 100       | 107               | 100 |
| Peptide Information |                                                                                                     |                        |                        |                    |            |          |                   |                                       |                    |                        |            |                |                |           |                    |           |                   |     |
|                     | Calc. Mass                                                                                          | Obsrv. Mass            | ± da                   | ± ppm              | Start Seq. | End Seq. | Sequence          | Ion Score                             | C. I. %            | Modification           |            | Rank           | Result Type    |           |                    |           |                   |     |
|                     | 961.4924                                                                                            | 961.4848               | -0.0076                | -8                 | 554        | 560      | VLDWICR           |                                       |                    | Carbamidomethyl (C)[6] |            |                | Mascot         |           |                    |           |                   |     |
|                     | 1067.4688                                                                                           | 1067.5835              | 0.1147                 | 107                | 415        | 423      | EPCAHPNSR         |                                       |                    | Carbamidomethyl (C)[3] |            |                | Mascot         |           |                    |           |                   |     |
|                     | 1118.5894                                                                                           | 1118.5875              | -0.0019                | -2                 | 529        | 536      | IFHNWNFR          | 28                                    | 0                  |                        |            |                | Mascot         |           |                    |           |                   |     |
|                     | 1118.5894                                                                                           | 1118.5875              | -0.0019                | -2                 | 529        | 536      | IFHNWNFR          |                                       |                    |                        |            |                | Mascot         |           |                    |           |                   |     |
|                     | 1135.6218                                                                                           | 1135.6116              | -0.0102                | -9                 | 262        | 271      | TLGHVPDQR         |                                       |                    |                        |            |                | Mascot         |           |                    |           |                   |     |
|                     | 1163.6783                                                                                           | 1163.5865              | -0.0918                | -79                | 2          | 12       | LFPSPSLSPR        |                                       |                    |                        |            |                | Mascot         |           |                    |           |                   |     |
|                     | 1163.6783                                                                                           | 1163.5865              | -0.0918                | -79                | 2          | 12       | LFPSPSLSPR        |                                       |                    |                        |            |                | Mascot         |           |                    |           |                   |     |
|                     | 1293.6375                                                                                           | 1293.6394              | 0.0019                 | 1                  | 543        | 553      | FLWPFGGENAR       |                                       |                    |                        |            |                | Mascot         |           |                    |           |                   |     |
|                     | 1293.6375                                                                                           | 1293.6394              | 0.0019                 | 1                  | 543        | 553      | FLWPFGGENAR       | 46                                    | 87.659             |                        |            |                | Mascot         |           |                    |           |                   |     |
|                     | 1328.7056                                                                                           | 1328.7001              | -0.0055                | -4                 | 625        | 636      | EVLALEALEGR       |                                       |                    |                        |            |                | Mascot         |           |                    |           |                   |     |
|                     | 1450.7477                                                                                           | 1450.7394              | -0.0083                | -6                 | 458        | 469      | GVPLVEAFNWR       |                                       |                    |                        |            |                | Mascot         |           |                    |           |                   |     |
|                     | 1450.7477                                                                                           | 1450.7394              | -0.0083                | -6                 | 458        | 469      | GVPLVEAFNWR       | 34                                    | 0                  |                        |            |                | Mascot         |           |                    |           |                   |     |
|                     | 1522.689                                                                                            | 1522.7644              | 0.0754                 | 50                 | 170        | 182      | AVDERPFGCMQGR     |                                       |                    | Carbamidomethyl (C)[9] |            |                | Mascot         |           |                    |           |                   |     |
|                     | 1725.884                                                                                            | 1725.8315              | -0.0525                | -30                | 201        | 216      | IGVQLTDSAYYVASMR  |                                       |                    | Oxidation [M]I[15]     |            |                | Mascot         |           |                    |           |                   |     |
|                     | 2211.1624                                                                                           | 2211.0916              | -0.0708                | -32                | 201        | 220      | IGVQLTDSAYYVASMRI |                                       |                    |                        |            |                | Mascot         |           |                    |           |                   |     |
| 7                   | RecName: Full=Phosphoenolpyruvate carboxykinase [GTP], mitochondrial; Short=PEPCK-M; AltName: Full= | gjl 52783203           |                        |                    |            |          |                   |                                       |                    |                        |            | 70482.5        | 6.92           | 10        | 158                | 100       | 107               | 100 |
| Peptide Information |                                                                                                     |                        |                        |                    |            |          |                   |                                       |                    |                        |            |                |                |           |                    |           |                   |     |
|                     | Calc. Mass                                                                                          | Obsrv. Mass            | ± da                   | ± ppm              | Start Seq. | End Seq. | Sequence          | Ion Score                             | C. I. %            | Modification           |            | Rank           | Result Type    |           |                    |           |                   |     |
|                     | 961.4924                                                                                            | 961.4848               | -0.0076                | -8                 | 554        | 560      | VLDWICR           |                                       |                    | Carbamidomethyl (C)[6] |            |                | Mascot         |           |                    |           |                   |     |
|                     | 1067.4688                                                                                           | 1067.5835              | 0.1147                 | 107                | 415        | 423      | EPCAHPNSR         |                                       |                    | Carbamidomethyl (C)[3] |            |                | Mascot         |           |                    |           |                   |     |
|                     | 1118.5894                                                                                           | 1118.5875              | -0.0019                | -2                 | 529        | 536      | IFHNWNFR          | 28                                    | 0                  |                        |            |                | Mascot         |           |                    |           |                   |     |
|                     | 1118.5894                                                                                           | 1118.5875              | -0.0019                | -2                 | 529        | 536      | IFHNWNFR          |                                       |                    |                        |            |                | Mascot         |           |                    |           |                   |     |
|                     | 1135.6218                                                                                           | 1135.6116              | -0.0102                | -9                 | 235        | 244      | TLGHVPDQR         |                                       |                    |                        |            |                | Mascot         |           |                    |           |                   |     |
|                     | 1293.6375                                                                                           | 1293.6394              | 0.0019                 | 1                  | 543        | 553      | FLWPFGGENAR       |                                       |                    |                        |            |                | Mascot         |           |                    |           |                   |     |
|                     | 1293.6375                                                                                           | 1293.6394              | 0.0019                 | 1                  | 543        | 553      | FLWPFGGENAR       | 46                                    | 87.659             |                        |            |                | Mascot         |           |                    |           |                   |     |
|                     | 1328.7056                                                                                           | 1328.7001              | -0.0055                | -4                 | 625        | 636      | EVLALEALEGR       |                                       |                    |                        |            |                | Mascot         |           |                    |           |                   |     |
|                     | 1450.7477                                                                                           | 1450.7394              | -0.0083                | -6                 | 458        | 469      | GVPLVEAFNWR       |                                       |                    |                        |            |                | Mascot         |           |                    |           |                   |     |
|                     | 1450.7477                                                                                           | 1450.7394              | -0.0083                | -6                 | 458        | 469      | GVPLVEAFNWR       | 34                                    | 0                  |                        |            |                | Mascot         |           |                    |           |                   |     |
|                     | 1522.689                                                                                            | 1522.7644              | 0.0754                 | 50                 | 143        | 155      | AVDERPFGCMQGR     |                                       |                    | Carbamidomethyl (C)[9] |            |                | Mascot         |           |                    |           |                   |     |
|                     | 1725.884                                                                                            | 1725.8315              | -0.0525                | -30                | 174        | 189      | IGVQLTDSAYYVASMR  |                                       |                    | Oxidation [M]I[15]     |            |                | Mascot         |           |                    |           |                   |     |
|                     | 2211.1624                                                                                           | 2211.0916              | -0.0708                | -32                | 174        | 193      | IGVQLTDSAYYVASMRI |                                       |                    |                        |            |                | Mascot         |           |                    |           |                   |     |
| 8                   | phosphoenolpyruvate carboxykinase 2 (mitochondrial), isoform CRA_b [Mus musculus]                   | gjl 148704343          |                        |                    |            |          |                   |                                       |                    |                        |            | 75752.2        | 8.3            | 10        | 154                | 100       | 107               | 100 |
| Peptide Information |                                                                                                     |                        |                        |                    |            |          |                   |                                       |                    |                        |            |                |                |           |                    |           |                   |     |
|                     | Calc. Mass                                                                                          | Obsrv. Mass            | ± da                   | ± ppm              | Start Seq. | End Seq. | Sequence          | Ion Score                             | C. I. %            | Modification           |            | Rank           | Result Type    |           |                    |           |                   |     |
|                     | 961.4924                                                                                            | 961.4848               | -0.0076                | -8                 | 605        | 611      | VLDWICR           |                                       |                    | Carbamidomethyl (C)[6] |            |                | Mascot         |           |                    |           |                   |     |
|                     | 1067.4688                                                                                           | 1067.5835              | 0.1147                 | 107                | 466        | 474      | EPCAHPNSR         |                                       |                    | Carbamidomethyl (C)[3] |            |                | Mascot         |           |                    |           |                   |     |
|                     | 1118.5894                                                                                           | 1118.5875              | -0.0019                | -2                 | 580        | 587      | IFHNWNFR          | 28                                    | 0                  |                        |            |                | Mascot         |           |                    |           |                   |     |
|                     | 1118.5894                                                                                           | 1118.5875              | -0.0019                | -2                 | 580        | 587      | IFHNWNFR          |                                       |                    |                        |            |                | Mascot         |           |                    |           |                   |     |
|                     | 1135.6218                                                                                           | 1135.6116              | -0.0102                | -9                 | 286        | 295      | TLGHVPDQR         |                                       |                    |                        |            |                | Mascot         |           |                    |           |                   |     |
|                     | 1293.6375                                                                                           | 1293.6394 #            | 0.0019                 | 1                  | 594        | 604      | FLWPFGGENAR       |                                       |                    |                        |            |                | Mascot         |           |                    |           |                   |     |
|                     | 1293.6375                                                                                           | 1293.6394              | 0.0019                 | 1                  | 594        | 604      | FLWPFGGENAR       | 46                                    | 87.659             |                        |            |                | Mascot         |           |                    |           |                   |     |
|                     | 1328.7056                                                                                           | 1328.7001              | -0.0055                | -4                 | 676        | 687      | EVLALEALEGR       |                                       |                    |                        |            |                | Mascot         |           |                    |           |                   |     |
|                     | 1450.7477                                                                                           | 1450.7394              | -0.0083                | -6                 | 509        | 520      | GVPLVEAFNWR       |                                       |                    |                        |            |                | Mascot         |           |                    |           |                   |     |
|                     | 1450.7477                                                                                           | 1450.7394              | -0.0083                | -6                 | 509        | 520      | GVPLVEAFNWR       | 34                                    | 0                  |                        |            |                | Mascot         |           |                    |           |                   |     |
|                     | 1522.689                                                                                            | 1522.7644              | 0.0754                 | 50                 | 194        | 206      | AVDERPFGCMQGR     |                                       |                    | Carbamidomethyl (C)[9] |            |                | Mascot         |           |                    |           |                   |     |
|                     | 1725.884                                                                                            | 1725.8315              | -0.0525                | -30                | 225        | 240      | IGVQLTDSAYYVASMR  |                                       |                    | Oxidation [M]I[15]     |            |                | Mascot         |           |                    |           |                   |     |
|                     | 2211.1624                                                                                           | 2211.0916              | -0.0708                | -32                | 225        | 244      | IGVQLTDSAYYVASMRI |                                       |                    |                        |            |                | Mascot         |           |                    |           |                   |     |
| 9                   | serum albumin [Bos indicus]                                                                         | gjl 76445989           |                        |                    |            |          |                   |                                       |                    |                        |            | 53890.1        | 6.09           | 9         | 153                | 100       | 115               | 100 |
| Peptide Information |                                                                                                     |                        |                        |                    |            |          |                   |                                       |                    |                        |            |                |                |           |                    |           |                   |     |
|                     | Calc. Mass                                                                                          | Obsrv. Mass            | ± da                   | ± ppm              | Start Seq. | End Seq. | Sequence          | Ion Score                             | C. I. %            | Modification           |            | Rank           | Result Type    |           |                    |           |                   |     |
|                     | 1352.666                                                                                            | 1352.7119              | 0.0459                 | 34                 | 365        | 376      | VTKKCTEELVNR      |                                       |                    |                        |            |                | Mascot         |           |                    |           |                   |     |
|                     | 1438.8118                                                                                           | 1438.8118              | -0.001                 | -1                 | 229        | 240      | RHPPEAVSVLLR      |                                       |                    |                        |            |                | Mascot         |           |                    |           |                   |     |
|                     | 1479.7954                                                                                           | 1479.7935              | -0.0019                | -1                 | 290        | 302      | LGEYGFONALIVR     |                                       |                    |                        |            |                | Mascot         |           |                    |           |                   |     |
|                     | 1479.7954                                                                                           | 1479.7935              | -0.0019                | -1                 | 290        | 302      | LGEYGFONALIVR     | 43                                    | 76.485             |                        |            |                | Mascot         |           |                    |           |                   |     |
|                     | 1522.7101                                                                                           | 1522.7644              | 0.0543                 | 36                 | 325        | 337      | VTGRCCTKPESR      |                                       |                    | Carbamidomethyl (C)[5] |            |                | Mascot         |           |                    |           |                   |     |
|                     | 1539.8199                                                                                           | 1539.795               | -0.0249                | -16                | 352        | 364      | LCVHKETVPSEK      |                                       |                    | Carbamidomethyl (C)[2] |            |                | Mascot         |           |                    |           |                   |     |
|                     | 1567.7427                                                                                           | 1567.7411              | -0.0016                | -1                 | 216        | 228      | DAFLGSLVEYSR      |                                       |                    |                        |            |                | Mascot         |           |                    |           |                   |     |
|                     | 1567.7427                                                                                           | 1567.7411              | -0.0016                | -1                 | 216        | 228      | DAFLGSLVEYSR      | 58                                    | 99.169             |                        |            |                | Mascot         |           |                    |           |                   |     |
|                     | 1639.9377                                                                                           | 1639.9337              | -0.004                 | -2                 | 306        | 320      | KPVQVSTPLTVEYSR   |                                       |                    |                        |            |                | Mascot         |           |                    |           |                   |     |
|                     | 1724.8346                                                                                           | 1724.8323              | -0.0023                | -1                 | 338        | 351      | MPCTEDLSLILNR     |                                       |                    | Carbamidomethyl (C)[3] |            |                | Mascot         |           |                    |           |                   |     |
|                     | 1880.9211                                                                                           | 1880.9138              | -0.0073                | -4                 | 377        | 392      | RPCFSALTPDITYPK   |                                       |                    | Carbamidomethyl (C)[3] |            |                | Mascot         |           |                    |           |                   |     |
|                     | 1880.9211                                                                                           | 1880.9138              | -0.0073                | -4                 | 377        | 392      | RPCFSALTPDITYPK   | 13                                    | 0                  | Carbamidomethyl (C)[3] |            |                | Mascot         |           |                    |           |                   |     |
| 10                  | unnamed protein product [Mus musculus]                                                              | gjl 74190979           |                        |                    |            |          |                   |                                       |                    |                        |            | 69397.9        | 8.37           | 9         | 150                | 100       | 107               | 100 |
| Peptide Information |                                                                                                     |                        |                        |                    |            |          |                   |                                       |                    |                        |            |                |                |           |                    |           |                   |     |
|                     | Calc. Mass                                                                                          | Obsrv. Mass            | ± da                   | ± ppm              | Start Seq. | End Seq. | Sequence          | Ion Score                             | C. I. %            | Modification           |            | Rank           | Result Type    |           |                    |           |                   |     |
|                     | 961.4924                                                                                            | 961.4848               | -0.0076                | -8                 | 578        | 584      | VLDWICR           |                                       |                    | Carbamidomethyl (C)[6] |            |                | Mascot         |           |                    |           |                   |     |
|                     | 1067.4688                                                                                           | 1067.5835              | 0.1147                 | 107                | 439        | 447      | EPCAHPNSR         |                                       |                    | Carbamidomethyl (C)[3] |            |                | Mascot         |           |                    |           |                   |     |
|                     | 1118.5894                                                                                           | 1118.5875              | -0.0019                | -2                 | 553        | 560      | IFHNWNFR          | 28                                    | 0                  |                        |            |                | Mascot         |           |                    |           |                   |     |
|                     | 1118.5894                                                                                           | 1118.5875              | -0.0019                | -2                 | 553        | 560      | IFHNWNFR          |                                       |                    |                        |            |                | Mascot         |           |                    |           |                   |     |
|                     | 1135.6218                                                                                           | 1135.6116              | -0.0102                | -9                 | 259        | 268      | TLGHVPDQR         |                                       |                    |                        |            |                | Mascot         |           |                    |           |                   |     |
|                     | 1293.6375                                                                                           | 1293.6394              | 0.0019                 | 1                  | 567        | 577      | FLWPFGGENAR       |                                       |                    |                        |            |                | Mascot         |           |                    |           |                   |     |
|                     | 1293.6375                                                                                           | 1293.6394              | 0.0019                 | 1                  | 567        | 577      | FLWPFGGENAR       | 46                                    | 87.659             |                        |            |                | Mascot         |           |                    |           |                   |     |
|                     | 1450.7477                                                                                           | 1450.7394 #            | -0.0083                | -6                 | 482        | 493      | GVPLVEAFNWR       |                                       |                    |                        |            |                | Mascot         |           |                    |           |                   |     |
|                     | 1450.7477                                                                                           | 1450.7394              | -0.0083                | -6                 | 482        | 493      | GVPLVEAFNWR       | 34                                    | 0                  |                        |            |                | Mascot         |           |                    |           |                   |     |
|                     | 1522.689                                                                                            | 1522.7644              | 0.0754                 | 50                 | 167        | 179      | AVDERPFGCMQGR     |                                       |                    | Carbamidomethyl (C)[9] |            |                | Mascot         |           |                    |           |                   |     |
|                     | 1725.884                                                                                            | 1725.8315              | -0.0525                | -30                | 198        | 213      | IGVQLTDSAYYVASMR  |                                       |                    | Oxidation [M]I[15]     |            |                | Mascot         |           |                    |           |                   |     |
|                     | 2211.1624                                                                                           | 2211.0916              | -0.0708                | -32                | 198        | 217      | IGVQLTDSAYYVASMRI |                                       |                    |                        |            |                | Mascot         |           |                    |           |                   |     |
| Get Idx/Pos         | 47/B18                                                                                              | Instr./Get Origin      |                        |                    |            |          |                   |                                       |                    |                        |            | AB4700/110211A | Process Status |           | Analysis Succeeded |           |                   |     |
| Plate #/ Name       | [1] 8907                                                                                            | Instrument Sample Name |                        |                    |            |          |                   |                                       |                    |                        |            | Spectra        |                | 6         |                    |           |                   |     |
| Rank                | Protein Name                                                                                        | Species                |                        |                    |            |          | Accession No.     |                                       |                    | Protein MW             | Protein PI | Protein Count  | Protein Score  | Protein % | Protein Score      | Protein % | Total Ion C. I. % |     |

|                     |                                                                                                   |              |         |       |            |          |                    |           |         |                                          |        |             |        |
|---------------------|---------------------------------------------------------------------------------------------------|--------------|---------|-------|------------|----------|--------------------|-----------|---------|------------------------------------------|--------|-------------|--------|
| 1                   | alpha-2-HS-glycoprotein precursor [Bos taurus]                                                    | gi 27806751  | 38394.4 | 5.26  | 4          | 346      | 100                | 301       | 100     |                                          |        |             |        |
| Peptide Information |                                                                                                   |              |         |       |            |          |                    |           |         |                                          |        |             |        |
|                     | Calc. Mass                                                                                        | Obsrv. Mass  | ± da    | ± ppm | Start Seq. | End Seq. | Sequence           | Ion Score | C. I. % | Modification                             | Rank   | Result Type |        |
|                     | 1269.6473                                                                                         | 1269.6556    | 0.0083  | 7     | 121        | 131      | QDGGFSLVFTK        |           |         |                                          |        | Mascot      |        |
|                     | 1269.6473                                                                                         | 1269.6556    | 0.0083  | 7     | 121        | 131      | QDGGFSLVFTK        | 73        | 99.94   |                                          |        | Mascot      |        |
|                     | 1474.8376                                                                                         | 1474.8623    | 0.0247  | 17    | 334        | 348      | TPVGGQSPGGPVR      | 111       | 100     |                                          |        | Mascot      |        |
|                     | 1474.8376                                                                                         | 1474.8623    | 0.0247  | 17    | 334        | 348      | TPVGGQSPGGPVR      |           |         |                                          |        | Mascot      |        |
|                     | 1977.9447                                                                                         | 1977.9626    | 0.0179  | 9     | 104        | 120      | QQTQHAVEGDCDIHVLK  | 57        | 97.922  | Carbamidomethyl (C)[11]                  |        | Mascot      |        |
|                     | 1977.9447                                                                                         | 1977.9626    | 0.0179  | 9     | 104        | 120      | QQTQHAVEGDCDIHVLK  |           |         | Carbamidomethyl (C)[11]                  |        | Mascot      |        |
|                     | 2120.0042                                                                                         | 2120.0356    | 0.0314  | 15    | 313        | 333      | HTFSGVASVESSSGEAF  |           |         |                                          |        | Mascot      |        |
|                     |                                                                                                   |              |         |       |            |          | HVGK               |           |         |                                          |        |             |        |
|                     | 2120.0042                                                                                         | 2120.0356    | 0.0314  | 15    | 313        | 333      | HTFSGVASVESSSGEAF  | 60        | 98.823  |                                          |        | Mascot      |        |
|                     |                                                                                                   |              |         |       |            |          | HVGK               |           |         |                                          |        |             |        |
| 2                   | alpha-2-HS-glycoprotein precursor [Ovis aries]                                                    | gi 57526674  | 38655.4 | 5.17  | 1          | 79       |                    |           |         |                                          | 99.016 | 73          | 99.94  |
| Peptide Information |                                                                                                   |              |         |       |            |          |                    |           |         |                                          |        |             |        |
|                     | Calc. Mass                                                                                        | Obsrv. Mass  | ± da    | ± ppm | Start Seq. | End Seq. | Sequence           | Ion Score | C. I. % | Modification                             | Rank   | Result Type |        |
|                     | 1269.6473                                                                                         | 1269.6556    | 0.0083  | 7     | 121        | 131      | QDGGFSLVFTK        |           |         |                                          |        | Mascot      |        |
|                     | 1269.6473                                                                                         | 1269.6556    | 0.0083  | 7     | 121        | 131      | QDGGFSLVFTK        | 73        | 99.94   |                                          |        | Mascot      |        |
| 3                   | hypothetical protein [Homo sapiens]                                                               | gi 21739834  | 55126.2 | 5.64  | 1          | 71       |                    |           |         |                                          | 93.347 | 66          | 99.678 |
| Peptide Information |                                                                                                   |              |         |       |            |          |                    |           |         |                                          |        |             |        |
|                     | Calc. Mass                                                                                        | Obsrv. Mass  | ± da    | ± ppm | Start Seq. | End Seq. | Sequence           | Ion Score | C. I. % | Modification                             | Rank   | Result Type |        |
|                     | 1474.9329                                                                                         | 1474.8623    | -0.0706 | -48   | 153        | 165      | VVLRQVVVPRPGR      | 66        | 99.678  |                                          |        | Mascot      |        |
|                     | 1474.9329                                                                                         | 1474.8623    | -0.0706 | -48   | 153        | 165      | VVLRQVVVPRPGR      |           |         |                                          |        | Mascot      |        |
| 4                   | inhibitor of nuclear factor kappa-B kinase subunit epsilon [Rattus norvegicus]                    | gi 157819637 | 80669.4 | 6.85  | 6          | 61       |                    |           |         |                                          | 30.335 |             |        |
| Peptide Information |                                                                                                   |              |         |       |            |          |                    |           |         |                                          |        |             |        |
|                     | Calc. Mass                                                                                        | Obsrv. Mass  | ± da    | ± ppm | Start Seq. | End Seq. | Sequence           | Ion Score | C. I. % | Modification                             | Rank   | Result Type |        |
|                     | 1269.593                                                                                          | 1269.6556    | 0.0626  | 49    | 532        | 541      | SRODIHEDNR         |           |         |                                          |        | Mascot      |        |
|                     | 1269.593                                                                                          | 1269.6556    | 0.0626  | 49    | 532        | 541      | SRODIHEDNR         |           |         |                                          |        | Mascot      |        |
|                     | 1452.7516                                                                                         | 1452.6681    | -0.0835 | -57   | 648        | 659      | MFQQLLDRAK         |           |         | Oxidation (M)[1]                         |        | Mascot      |        |
|                     | 1474.8164                                                                                         | 1474.8623    | 0.0459  | 31    | 419        | 432      | GLVGAGYQALWLAR     |           |         |                                          |        | Mascot      |        |
|                     | 1474.8164                                                                                         | 1474.8623    | 0.0459  | 31    | 419        | 432      | GLVGAGYQALWLAR     |           |         |                                          |        | Mascot      |        |
|                     | 1960.9657                                                                                         | 1960.9489    | -0.0168 | -9    | 563        | 578      | SRMRPLGSYNEEQIHK   |           |         | Oxidation (M)[3]                         |        | Mascot      |        |
|                     | 1977.9857                                                                                         | 1977.9626    | -0.0231 | -12   | 118        | 134      | CVVAGMNHLENGIVHR   |           |         | Carbamidomethyl (C)[1], Oxidation (M)[6] |        | Mascot      |        |
|                     | 1977.9857                                                                                         | 1977.9626    | -0.0231 | -12   | 118        | 134      | CVVAGMNHLENGIVHR   |           |         | Carbamidomethyl (C)[1], Oxidation (M)[6] |        | Mascot      |        |
|                     | 2119.9541                                                                                         | 2120.0356    | 0.0815  | 38    | 292        | 308      | CWGFDOFFAETSILOR   |           |         | Carbamidomethyl (C)[1]                   |        | Mascot      |        |
|                     | 2119.9541                                                                                         | 2120.0356    | 0.0815  | 38    | 292        | 308      | CWGFDOFFAETSILOR   |           |         | Carbamidomethyl (C)[1]                   |        | Mascot      |        |
| 5                   | PREDICTED: similar to protein phosphatase 2 (formerly 2A), regulatory subunit A (PR 65), beta iso | gi 73954794  | 59098.7 | 4.99  | 5          | 49       |                    |           |         |                                          | 0      |             |        |
| Peptide Information |                                                                                                   |              |         |       |            |          |                    |           |         |                                          |        |             |        |
|                     | Calc. Mass                                                                                        | Obsrv. Mass  | ± da    | ± ppm | Start Seq. | End Seq. | Sequence           | Ion Score | C. I. % | Modification                             | Rank   | Result Type |        |
|                     | 1269.6433                                                                                         | 1269.6556    | 0.0123  | 10    | 280        | 290      | ELVSDTNQHVK        |           |         |                                          |        | Mascot      |        |
|                     | 1269.6433                                                                                         | 1269.6556    | 0.0123  | 10    | 280        | 290      | ELVSDTNQHVK        |           |         |                                          |        | Mascot      |        |
|                     | 1452.657                                                                                          | 1452.6681    | 0.0111  | 8     | 120        | 131      | SLCSDPTMVR         |           |         | Carbamidomethyl (C)[3], Oxidation (M)[9] |        | Mascot      |        |
|                     | 1460.956                                                                                          | 1460.8452    | 0.1792  | 123   | 93         | 105      | TSACQLFSVQYPR      |           |         | Carbamidomethyl (C)[4]                   |        | Mascot      |        |
|                     | 1474.7246                                                                                         | 1474.8623    | 0.1377  | 93    | 209        | 220      | YMWADKFSLELK       |           |         | Oxidation (M)[2]                         |        | Mascot      |        |
|                     | 1474.7246                                                                                         | 1474.8623    | 0.1377  | 93    | 209        | 220      | YMWADKFSLELK       |           |         | Oxidation (M)[2]                         |        | Mascot      |        |
|                     | 2120.0505                                                                                         | 2120.0356    | -0.0149 | -7    | 151        | 169      | SEIVPLFTNLASDEQDSV |           |         |                                          |        | Mascot      |        |
|                     |                                                                                                   |              |         |       |            |          | R                  |           |         |                                          |        |             |        |
|                     | 2120.0505                                                                                         | 2120.0356    | -0.0149 | -7    | 151        | 169      | SEIVPLFTNLASDEQDSV |           |         |                                          |        | Mascot      |        |
|                     |                                                                                                   |              |         |       |            |          | R                  |           |         |                                          |        |             |        |
| 6                   | PREDICTED: similar to Macrophage expressed gene 1 [Monodelphis domestica]                         | gi 126333394 | 116325  | 8.85  | 6          | 48       |                    |           |         |                                          | 0      |             |        |
| Peptide Information |                                                                                                   |              |         |       |            |          |                    |           |         |                                          |        |             |        |
|                     | Calc. Mass                                                                                        | Obsrv. Mass  | ± da    | ± ppm | Start Seq. | End Seq. | Sequence           | Ion Score | C. I. % | Modification                             | Rank   | Result Type |        |
|                     | 1269.7273                                                                                         | 1269.6556    | -0.0717 | -56   | 334        | 345      | IQLGANLTGQVR       |           |         |                                          |        | Mascot      |        |
|                     | 1269.7273                                                                                         | 1269.6556    | -0.0717 | -56   | 334        | 345      | IQLGANLTGQVR       |           |         |                                          |        | Mascot      |        |
|                     | 1431.7968                                                                                         | 1431.8541    | 0.0573  | 40    | 928        | 940      | GLFHHVPVNGGRLK     |           |         |                                          |        | Mascot      |        |
|                     | 1431.7968                                                                                         | 1431.8541    | 0.0573  | 40    | 928        | 940      | GLFHHVPVNGGRLK     |           |         |                                          |        | Mascot      |        |
|                     | 1452.7766                                                                                         | 1452.6681    | -0.1085 | -75   | 829        | 841      | FLKSLDETCVLK       |           |         | Oxidation (M)[3]                         |        | Mascot      |        |
|                     | 1460.705                                                                                          | 1460.8452    | 0.1402  | 96    | 177        | 188      | ESMLETHSEIR        |           |         |                                          |        | Mascot      |        |
|                     | 1961.0426                                                                                         | 1960.9489    | -0.0037 | -48   | 59         | 75       | TPPEPGASWQLRHMLIK  |           |         |                                          |        | Mascot      |        |
|                     | 1977.9751                                                                                         | 1977.9626    | -0.0125 | -6    | 460        | 477      | HHFTFGGVFOKQAVSG   |           |         |                                          |        | Mascot      |        |
|                     |                                                                                                   |              |         |       |            |          | K                  |           |         |                                          |        |             |        |
|                     | 1977.9751                                                                                         | 1977.9626    | -0.0125 | -6    | 460        | 477      | HHFTFGGVFOKQAVSG   |           |         |                                          |        | Mascot      |        |
|                     |                                                                                                   |              |         |       |            |          | K                  |           |         |                                          |        |             |        |
| 7                   | PREDICTED: similar to G-2 and S-phase expressed 1 [Ornithorynchus anatinus]                       | gi 149633544 | 77874.8 | 7.08  | 5          | 46       |                    |           |         |                                          | 0      |             |        |
| Peptide Information |                                                                                                   |              |         |       |            |          |                    |           |         |                                          |        |             |        |
|                     | Calc. Mass                                                                                        | Obsrv. Mass  | ± da    | ± ppm | Start Seq. | End Seq. | Sequence           | Ion Score | C. I. % | Modification                             | Rank   | Result Type |        |
|                     | 1269.691                                                                                          | 1269.6556    | -0.0354 | -28   | 287        | 298      | LQPKSSSAQAR        |           |         |                                          |        | Mascot      |        |
|                     | 1269.691                                                                                          | 1269.6556    | -0.0354 | -28   | 287        | 298      | LQPKSSSAQAR        |           |         |                                          |        | Mascot      |        |
|                     | 1431.7842                                                                                         | 1431.8541    | 0.0699  | 49    | 173        | 184      | SQVVEKFQIEPK       |           |         |                                          |        | Mascot      |        |
|                     | 1431.7842                                                                                         | 1431.8541    | 0.0699  | 49    | 173        | 184      | SQVVEKFQIEPK       |           |         |                                          |        | Mascot      |        |
|                     | 1460.822                                                                                          | 1460.8452    | 0.0232  | 16    | 496        | 508      | SPFAPRESLTAR       |           |         |                                          |        | Mascot      |        |
|                     | 1977.9135                                                                                         | 1977.9626    | 0.0491  | 25    | 608        | 625      | GTEELAEKTSPEEETK   |           |         |                                          |        | Mascot      |        |
|                     | 1977.9135                                                                                         | 1977.9626    | 0.0491  | 25    | 608        | 625      | GTEELAEKTSPEEETK   |           |         |                                          |        | Mascot      |        |
|                     | 2120.073                                                                                          | 2120.0356    | -0.0374 | -18   | 412        | 433      | STPAGQTQGPAAIPQTP  |           |         |                                          |        | Mascot      |        |
|                     |                                                                                                   |              |         |       |            |          | DGAVR              |           |         |                                          |        |             |        |
|                     | 2120.073                                                                                          | 2120.0356    | -0.0374 | -18   | 412        | 433      | STPAGQTQGPAAIPQTP  |           |         |                                          |        | Mascot      |        |
|                     |                                                                                                   |              |         |       |            |          | DGAVR              |           |         |                                          |        |             |        |
| 8                   | PREDICTED: gamma-tubulin complex component 4 [Sus scrofa]                                         | gi 311244882 | 75895.2 | 6.12  | 5          | 46       |                    |           |         |                                          | 0      |             |        |
| Peptide Information |                                                                                                   |              |         |       |            |          |                    |           |         |                                          |        |             |        |
|                     | Calc. Mass                                                                                        | Obsrv. Mass  | ± da    | ± ppm | Start Seq. | End Seq. | Sequence           | Ion Score | C. I. % | Modification                             | Rank   | Result Type |        |
|                     | 1269.6949                                                                                         | 1269.6556    | -0.0393 | -31   | 617        | 627      | GFSROSSLLFK        |           |         |                                          |        | Mascot      |        |
|                     | 1269.6949                                                                                         | 1269.6556    | -0.0393 | -31   | 617        | 627      | GFSROSSLLFK        | 1         | 0       |                                          |        | Mascot      |        |
|                     | 1431.8499                                                                                         | 1431.8541    | 0.2042  | 143   | 302        | 313      | DQEDTFAELHR        |           |         |                                          |        | Mascot      |        |
|                     | 1431.8499                                                                                         | 1431.8541    | 0.2042  | 143   | 302        | 313      | DQEDTFAELHR        |           |         |                                          |        | Mascot      |        |
|                     | 1452.6464                                                                                         | 1452.6681    | 0.0217  | 15    | 653        | 666      | YYTOAGGTLSGFGM     |           |         |                                          |        | Mascot      |        |
|                     | 1460.7566                                                                                         | 1460.8452    | 0.0886  | 61    | 148        | 159      | IHGCOILETVYK       |           |         | Carbamidomethyl (C)[4]                   |        | Mascot      |        |
|                     | 1474.7821                                                                                         | 1474.8623    | 0.0802  | 54    | 343        | 355      | LMVEESDLLGLQK      |           |         |                                          |        | Mascot      |        |
|                     | 1474.7821                                                                                         | 1474.8623    | 0.0802  | 54    | 343        | 355      | LMVEESDLLGLQK      |           |         |                                          |        | Mascot      |        |
| 9                   | rcG61463 [Rattus norvegicus]                                                                      | gi 149051492 | 5462.6  | 9.41  | 3          | 46       |                    |           |         |                                          | 0      |             |        |
| Peptide Information |                                                                                                   |              |         |       |            |          |                    |           |         |                                          |        |             |        |
|                     | Calc. Mass                                                                                        | Obsrv. Mass  | ± da    | ± ppm | Start Seq. | End Seq. | Sequence           | Ion Score | C. I. % | Modification                             | Rank   | Result Type |        |
|                     | 1474.689                                                                                          | 1474.8623    | 0.1733  | 118   | 6          | 18       | GPSDVRPCSQLCR      |           |         | Carbamidomethyl (C)[8]                   |        | Mascot      |        |
|                     | 1474.689                                                                                          | 1474.8623    | 0.1733  | 118   | 6          | 18       | GPSDVRPCSQLCR      |           |         | Carbamidomethyl (C)[8]                   |        | Mascot      |        |
|                     | 1960.9327                                                                                         | 1960.9489    | 0.0162  | 8     | 2          | 18       | ATEKGPSDVRPCSQLCR  |           |         | Carbamidomethyl (C)[12,16]               |        | Mascot      |        |
|                     | 1977.9303                                                                                         | 1977.9626    | 0.0323  | 16    | 1          | 18       | MATEKGPSDVRPCSQLC  |           |         |                                          |        | Mascot      |        |
|                     |                                                                                                   |              |         |       |            |          | R                  |           |         |                                          |        |             |        |
|                     | 1977.9303                                                                                         | 1977.9626    | 0.0323  | 16    | 1          | 18       | MATEKGPSDVRPCSQLC  |           |         |                                          |        | Mascot      |        |
|                     |                                                                                                   |              |         |       |            |          | R                  |           |         |                                          |        |             |        |
| 10                  | PREDICTED: POTE ankyrin domain family member D-like, partial [Macaca mulatta]                     | gi 109086315 | 30631   | 4.74  | 4          | 45       |                    |           |         |                                          | 0      |             |        |
| Peptide Information |                                                                                                   |              |         |       |            |          |                    |           |         |                                          |        |             |        |
|                     | Calc. Mass                                                                                        | Obsrv. Mass  | ± da    | ± ppm | Start Seq. | End Seq. | Sequence           | Ion Score | C. I. % | Modification                             | Rank   | Result Type |        |
|                     | 1460.6863                                                                                         | 1460.8452    | 0.1589  | 109   | 62         | 74       | ISSENSNPQDLK       |           |         |                                          |        | Mascot      |        |

|             |                                                                                                    |             |           |         |            |          |                           |                          |         |                         |              |         |                        |   |     |  |      |             |        |
|-------------|----------------------------------------------------------------------------------------------------|-------------|-----------|---------|------------|----------|---------------------------|--------------------------|---------|-------------------------|--------------|---------|------------------------|---|-----|--|------|-------------|--------|
|             |                                                                                                    | 1474.812    | 1474.8623 | 0.0903  | 34         | 221      | 232                       | MLEEIAIMRLRK             |         |                         |              |         |                        |   |     |  |      |             | Mascot |
|             |                                                                                                    | 1474.812    | 1474.8623 | 0.0903  | 34         | 221      | 232                       | MLEEIAMLRLK              |         |                         |              |         |                        |   |     |  |      |             | Mascot |
|             |                                                                                                    | 1960.9645   | 1960.9489 | -0.0156 | -8         | 58       | 74                        | QMLKISSENSEPNQQDL        |         |                         |              |         |                        |   |     |  |      |             | Mascot |
|             |                                                                                                    | 2120.0903   | 2120.0356 | -0.0547 | -26        | 9        | 28                        | CGRSASIVSLLEQNIDVSS<br>K |         |                         |              |         | Carbamidomethyl (C)[1] |   |     |  |      |             | Mascot |
|             |                                                                                                    | 2120.0903   | 2120.0356 | -0.0547 | -26        | 9        | 28                        | CGRSASIVSLLEQNIDVSS<br>K |         |                         |              |         | Carbamidomethyl (C)[1] |   |     |  |      |             | Mascot |
| Gel Idx/Pos |                                                                                                    | 36/B19      |           |         |            |          |                           | Instr./Gel Origin        |         | AB4700/110211A          |              |         |                        |   |     |  |      |             |        |
| Rank        | # Name                                                                                             | [1] 8907    |           |         |            |          |                           | Instrument Sample Name   |         |                         |              |         |                        |   |     |  |      |             |        |
|             | Protein Name                                                                                       |             |           |         |            |          |                           | Species                  |         |                         |              |         |                        |   |     |  |      |             |        |
|             |                                                                                                    |             |           |         |            |          |                           |                          |         |                         |              |         |                        |   |     |  |      |             |        |
|             |                                                                                                    |             |           |         |            |          |                           |                          |         |                         |              |         |                        |   |     |  |      |             |        |
| 1           | alpha-2-HS-glycoprotein precursor [Bos taurus]                                                     |             |           |         |            |          |                           |                          |         |                         | gi 27806751  | 38394.4 | 5.26                   | 6 | 390 |  | 100  | 331         | 100    |
|             | Peptide Information                                                                                |             |           |         |            |          |                           |                          |         |                         |              |         |                        |   |     |  |      |             |        |
|             | Calc. Mass                                                                                         | Obsrv. Mass | ± da      | ± ppm   | Start Seq. | End Seq. | Sequence                  | Ion Score                | C. I. % | Modification            |              |         |                        |   |     |  | Rank | Result Type |        |
|             | 1154.6165                                                                                          | 1154.6233   | 0.0068    | 6       | 58         | 67       | HTLNQIDSVK                |                          |         |                         |              |         |                        |   |     |  |      |             |        |
|             | 1269.6473                                                                                          | 1269.6429   | -0.0044   | -3      | 121        | 131      | QDGGFVSFLTK               | 73                       | 99.952  |                         |              |         |                        |   |     |  |      |             | Mascot |
|             | 1269.6473                                                                                          | 1269.6429   | -0.0044   | -3      | 121        | 131      | QDGGFVSFLTK               |                          |         |                         |              |         |                        |   |     |  |      |             | Mascot |
|             | 1465.6223                                                                                          | 1465.6345   | 0.0122    | 8       | 132        | 144      | CDSPSDSAEDVRK             |                          |         |                         |              |         |                        |   |     |  |      |             | Mascot |
|             | 1474.8376                                                                                          | 1474.8481   | 0.0105    | 7       | 334        | 348      | TPWGPSIPGQVPR             | 112                      | 100     | Carbamidomethyl (C)[1]  |              |         |                        |   |     |  |      |             | Mascot |
|             | 1474.8376                                                                                          | 1474.8481   | 0.0105    | 7       | 334        | 348      | TPWGPSIPGQVPR             |                          |         |                         |              |         |                        |   |     |  |      |             | Mascot |
|             | 1977.9447                                                                                          | 1977.9456   | 0.0009    | 0       | 104        | 120      | QQTQHAVEGDCCIHLVK         | 57                       | 98.03   | Carbamidomethyl (C)[11] |              |         |                        |   |     |  |      |             | Mascot |
|             | 1977.9447                                                                                          | 1977.9456   | 0.0009    | 0       | 104        | 120      | QQTQHAVEGDCCIHLVK         |                          |         |                         |              |         |                        |   |     |  |      |             | Mascot |
|             | 2120.0042                                                                                          | 2120.0049   | 0.0007    | 0       | 313        | 333      | HTFSGVASVESSGEAF<br>HV GK | 88                       | 99.998  | Carbamidomethyl (C)[11] |              |         |                        |   |     |  |      |             | Mascot |
|             | 2120.0042                                                                                          | 2120.0049   | 0.0007    | 0       | 313        | 333      | HTFSGVASVESSGEAF<br>HV GK |                          |         |                         |              |         |                        |   |     |  |      |             | Mascot |
| 2           | RecName: Full-Serin A3-1; AltName: Full=Endopin-1A; AltName: Full=Muscle endopin-1A; Short=Endopdi |             |           |         |            |          |                           |                          |         |                         | gi 160332365 | 46208.2 | 5.67                   | 3 | 140 |  | 100  | 120         | 100    |
|             | Peptide Information                                                                                |             |           |         |            |          |                           |                          |         |                         |              |         |                        |   |     |  |      |             |        |
|             | Calc. Mass                                                                                         | Obsrv. Mass | ± da      | ± ppm   | Start Seq. | End Seq. | Sequence                  | Ion Score                | C. I. % | Modification            |              |         |                        |   |     |  | Rank | Result Type |        |
|             | 1168.6837                                                                                          | 1168.7021   | 0.0184    | 16      | 300        | 308      | RHIELYLPK                 | 17                       | 0       |                         |              |         |                        |   |     |  |      |             | Mascot |
|             | 1168.6837                                                                                          | 1168.7021   | 0.0184    | 16      | 300        | 308      | RHIELYLPK                 |                          |         |                         |              |         |                        |   |     |  |      |             | Mascot |
|             | 1734.9021                                                                                          | 1734.9136   | 0.0115    | 7       | 313        | 327      | SNYELNDLSQLGIR            |                          |         |                         |              |         |                        |   |     |  |      |             | Mascot |
|             | 1734.9021                                                                                          | 1734.9136   | 0.0115    | 7       | 313        | 327      | SNYELNDLSQLGIR            | 104                      | 100     |                         |              |         |                        |   |     |  |      |             | Mascot |
|             | 2234.0764                                                                                          | 2234.0801   | 0.0037    | 2       | 147        | 165      | FIEDAQVLNYSSEAFFTNF<br>R  |                          |         |                         |              |         |                        |   |     |  |      |             |        |

[illegible]

|    |                                                                                                        |              |           |        |            |          |                              |                               |              |                                                    |                    |            |             |                   |
|----|--------------------------------------------------------------------------------------------------------|--------------|-----------|--------|------------|----------|------------------------------|-------------------------------|--------------|----------------------------------------------------|--------------------|------------|-------------|-------------------|
|    |                                                                                                        | 2379.1975    | 2379.2942 | 0.0067 | 41         | 132      | 151                          | CK<br>EELAVLLQSDPFFMPEI<br>CK |              | Carbamidomethyl (C)[19]                            |                    | Mascot     |             |                   |
|    |                                                                                                        | 2757.3877    | 2757.4426 | 0.0549 | 20         | 132      | 154                          | EELAVLLQSDPFFMPEI<br>CKSYK    |              | Carbamidomethyl (C)[19]                            |                    | Mascot     |             |                   |
|    |                                                                                                        | 2757.3877    | 2757.4426 | 0.0549 | 20         | 132      | 154                          | EELAVLLQSDPFFMPEI<br>CKSYK    |              | Carbamidomethyl (C)[19]                            |                    | Mascot     |             |                   |
| 7  | chromosome X open reading frame 22, isoform CRA_a<br>[Homo sapiens]                                    |              |           |        |            |          |                              |                               | gi 119619480 | 85428.4                                            | 8.86               | 6          | 46          | 0                 |
|    | Peptide Information                                                                                    |              |           |        |            |          |                              |                               |              |                                                    |                    |            |             |                   |
|    | Calc. Mass                                                                                             | Obsrv. Mass  | ± da      | ± ppm  | Start Seq. | End Seq. | Sequence                     | Ion Score                     | C. I. %      | Modification                                       |                    | Rank       | Result Type |                   |
|    | 1398.7773                                                                                              | 1398.6405    | -0.1278   | -91    | 37         | 48       | DMQLRVIPAEVK                 |                               |              |                                                    |                    | Mascot     |             |                   |
|    | 1768.8357                                                                                              | 1769.0361    | 0.2004    | 113    | 198        | 212      | SSMVIKVFCDADQPR              |                               |              | Carbamidomethyl (C)[10], Oxidation (M)[3]          |                    | Mascot     |             |                   |
|    | 1768.8357                                                                                              | 1769.0361    | 0.2004    | 113    | 198        | 212      | SSMVIKVFCDADQPR              |                               |              | Carbamidomethyl (C)[10], Oxidation (M)[3]          |                    | Mascot     |             |                   |
|    | 1940.0494                                                                                              | 1940.0897    | 0.0403    | 21     | 6          | 23       | GSLTINVHRGSLMSIQR            |                               |              |                                                    |                    | Mascot     |             |                   |
|    | 1942.9902                                                                                              | 1942.9845    | -0.0057   | -3     | 234        | 250      | AHVVEQIELLSMSSDR             |                               |              | Oxidation (M)[13]                                  |                    | Mascot     |             |                   |
|    | 1942.9902                                                                                              | 1942.9845    | -0.0057   | -3     | 234        | 250      | AHVVEQIELLSMSSDR             |                               |              | Oxidation (M)[13]                                  |                    | Mascot     |             |                   |
|    | 2379.1658                                                                                              | 2379.2942    | 0.1284    | 54     | 464        | 485      | ITGGGMVDVMSCFVPHQ<br>LGVFK   |                               |              | Carbamidomethyl (C)[11]                            |                    | Mascot     |             |                   |
|    | 2379.1658                                                                                              | 2379.2942    | 0.1284    | 54     | 464        | 485      | ITGGGMVDVMSCFVPHQ<br>LGVFK   |                               |              | Carbamidomethyl (C)[11]                            |                    | Mascot     |             |                   |
|    | 2518.2856                                                                                              | 2518.2056    | -0.08     | -32    | 318        | 339      | NIDTTIISCLPNEGTLQPY<br>QK    |                               |              | Carbamidomethyl (C)[10]                            |                    | Mascot     |             |                   |
|    | 2518.2856                                                                                              | 2518.2056    | -0.08     | -32    | 318        | 339      | NIDTTIISCLPNEGTLQPY<br>QK    |                               |              | Carbamidomethyl (C)[10]                            |                    | Mascot     |             |                   |
| 8  | RecName: Full=Nesprin-1; AltName: Full=Enaptin;<br>AltName: Full=Myocyte nuclear envelope protein 1; S |              |           |        |            |          |                              |                               | gi 292630942 | 1009294.7                                          | 5.43               | 13         | 45          | 0                 |
|    | Peptide Information                                                                                    |              |           |        |            |          |                              |                               |              |                                                    |                    |            |             |                   |
|    | Calc. Mass                                                                                             | Obsrv. Mass  | ± da      | ± ppm  | Start Seq. | End Seq. | Sequence                     | Ion Score                     | C. I. %      | Modification                                       |                    | Rank       | Result Type |                   |
|    | 1178.6165                                                                                              | 1178.6625    | 0.048     | 39     | 6749       | 6758     | LYQALDDGKR                   |                               |              |                                                    |                    | Mascot     |             |                   |
|    | 1279.5696                                                                                              | 1279.6931    | 0.1235    | 97     | 1937       | 1947     | SASPEERTSCR                  |                               |              | Carbamidomethyl (C)[10]                            |                    | Mascot     |             |                   |
|    | 1279.5696                                                                                              | 1279.6931    | 0.1235    | 97     | 1937       | 1947     | SASPEERTSCR                  |                               |              | Carbamidomethyl (C)[10]                            |                    | Mascot     |             |                   |
|    | 1398.8028                                                                                              | 1398.6405    | 0.0467    | 33     | 3966       | 3977     | AMMEIAGFEDR                  |                               |              |                                                    |                    | Mascot     |             |                   |
|    | 1593.6962                                                                                              | 1593.8579    | 0.1617    | 101    | 5039       | 5051     | TEGQFHSNMEELR                |                               |              | Oxidation (M)[9]                                   |                    | Mascot     |             |                   |
|    | 1597.8156                                                                                              | 1597.8212    | 0.0056    | 4      | 2524       | 2535     | KLNLWIHEMEER                 |                               |              |                                                    |                    | Mascot     |             |                   |
|    | 1597.8156                                                                                              | 1597.8212    | 0.0056    | 4      | 2524       | 2535     | KLNLWIHEMEER                 |                               |              |                                                    |                    | Mascot     |             |                   |
|    | 1768.9163                                                                                              | 1769.0361    | 0.1198    | 68     | 900        | 914      | QIADVHAFQSMIKK               | 3                             | 0            | Oxidation (M)[12]                                  |                    | Mascot     |             |                   |
|    | 1768.9163                                                                                              | 1769.0361    | 0.1198    | 68     | 900        | 914      | QIADVHAFQSMIKK               |                               |              | Oxidation (M)[12]                                  |                    | Mascot     |             |                   |
|    | 1940.0018                                                                                              | 1940.0897    | 0.0879    | 45     | 2592       | 2608     | GGCRSTQLTTSYOSLLR            |                               |              | Carbamidomethyl (C)[3]                             |                    | Mascot     |             |                   |
|    | 1942.8884                                                                                              | 1942.9845    | 0.0061    | 49     | 5415       | 5431     | VOEIEEGKAMSQEFSCCK           |                               |              |                                                    |                    | Mascot     |             |                   |
|    | 1942.8884                                                                                              | 1942.9845    | 0.0061    | 49     | 5415       | 5431     | VOEIEEGKAMSQEFSCCK           |                               |              |                                                    |                    | Mascot     |             |                   |
|    | 2379.176                                                                                               | 2379.2942    | 0.1182    | 50     | 4138       | 4156     | AEWLWYLDADQQLONM<br>KR       |                               |              | Oxidation (M)[17]                                  |                    | Mascot     |             |                   |
|    | 2379.1907                                                                                              | 2379.2942    | 0.1035    | 44     | 5665       | 5683     | EQLCHRHLLSEMESLK<br>PK       |                               |              | Carbamidomethyl (C)[4], Oxidation (M)[13]          |                    | Mascot     |             |                   |
|    | 2518.2241                                                                                              | 2518.2056    | -0.0185   | -7     | 1621       | 1642     | ESCTOEAAALQQQYEEIL<br>HKAK   |                               |              |                                                    |                    | Mascot     |             |                   |
|    | 2518.2241                                                                                              | 2518.2056    | -0.0185   | -7     | 1621       | 1642     | ESCTOEAAALQQQYEEIL<br>HKAK   |                               |              |                                                    |                    | Mascot     |             |                   |
|    | 2757.1841                                                                                              | 2757.4426    | 0.2585    | 94     | 3289       | 3311     | ELQDWMSDAVHMLDSY<br>CLPTSDK  |                               |              | Carbamidomethyl (C)[17], Oxidation (M)[6]          |                    | Mascot     |             |                   |
|    | 2757.3875                                                                                              | 2757.4426    | 0.0551    | 20     | 6514       | 6537     | LNVFEQPIVEQMQAIIQ<br>AEEGLR  |                               |              | Oxidation (M)[13]                                  |                    | Mascot     |             |                   |
| 9  | PREDICTED: tripartite motif-containing protein 67-like<br>isoform 2 [Macaca mulatta]                   |              |           |        |            |          |                              |                               | gi 297281845 | 83723.4                                            | 7.27               | 6          | 45          | 0                 |
|    | Peptide Information                                                                                    |              |           |        |            |          |                              |                               |              |                                                    |                    |            |             |                   |
|    | Calc. Mass                                                                                             | Obsrv. Mass  | ± da      | ± ppm  | Start Seq. | End Seq. | Sequence                     | Ion Score                     | C. I. %      | Modification                                       |                    | Rank       | Result Type |                   |
|    | 1178.6272                                                                                              | 1178.6625    | 0.0353    | 30     | 672        | 682      | ASV/KDMMMLGK                 |                               |              |                                                    |                    | Mascot     |             |                   |
|    | 1279.5994                                                                                              | 1279.6931    | 0.0937    | 73     | 522        | 531      | CCTRNNSVIR                   |                               |              | Carbamidomethyl (C)[1,2]                           |                    | Mascot     |             |                   |
|    | 1279.5994                                                                                              | 1279.6931    | 0.0937    | 73     | 522        | 531      | CCTRNNSVIR                   |                               |              | Carbamidomethyl (C)[1,2]                           |                    | Mascot     |             |                   |
|    | 1597.7064                                                                                              | 1597.8212    | 0.1148    | 72     | 683        | 695      | DDKAWAMYVDNNR                |                               |              |                                                    |                    | Mascot     |             |                   |
|    | 1597.7064                                                                                              | 1597.8212    | 0.1148    | 72     | 683        | 695      | DDKAWAMYVDNNR                |                               |              |                                                    |                    | Mascot     |             |                   |
|    | 1939.9979                                                                                              | 1940.0897    | 0.0918    | 47     | 433        | 448      | LRQSTGLMEYCLEVIK             |                               |              | Carbamidomethyl (C)[11]                            |                    | Mascot     |             |                   |
|    | 1942.9769                                                                                              | 1942.9845    | 0.0076    | 4      | 659        | 676      | YDNHPDPAFGVARASVV<br>K       |                               |              |                                                    |                    | Mascot     |             |                   |
|    | 1942.9769                                                                                              | 1942.9845    | 0.0076    | 4      | 659        | 676      | YDNHPDPAFGVARASVV<br>K       |                               |              |                                                    |                    | Mascot     |             |                   |
|    | 2757.0869                                                                                              | 2757.4426    | 0.3557    | 129    | 298        | 318      | KFPTCPHEHENYMSYK<br>VSCR     |                               |              | Carbamidomethyl (C)[5,17,20], Oxidation (M)[10,15] |                    | Mascot     |             |                   |
|    | 2757.0869                                                                                              | 2757.4426    | 0.3557    | 129    | 298        | 318      | KFPTCPHEHENYMSYK<br>VSCR     |                               |              | Carbamidomethyl (C)[5,17,20], Oxidation (M)[10,15] |                    | Mascot     |             |                   |
| 10 | PREDICTED: ras GTPase-activating protein 1-like,<br>partial [Sus scrofa]                               |              |           |        |            |          |                              |                               | gi 311249821 | 88989.7                                            | 6.63               | 6          | 44          | 0                 |
|    | Peptide Information                                                                                    |              |           |        |            |          |                              |                               |              |                                                    |                    |            |             |                   |
|    | Calc. Mass                                                                                             | Obsrv. Mass  | ± da      | ± ppm  | Start Seq. | End Seq. | Sequence                     | Ion Score                     | C. I. %      | Modification                                       |                    | Rank       | Result Type |                   |
|    | 1279.6212                                                                                              | 1279.6931    | 0.0719    | 56     | 609        | 618      | WPTNTTMRTR                   |                               |              | Oxidation (M)[7]                                   |                    | Mascot     |             |                   |
|    | 1279.6212                                                                                              | 1279.6931    | 0.0719    | 56     | 609        | 618      | WPTNTTMRTR                   |                               |              | Oxidation (M)[7]                                   |                    | Mascot     |             |                   |
|    | 1593.7876                                                                                              | 1593.8579    | 0.0703    | 44     | 391        | 403      | DPDILFMRQLSR                 |                               |              |                                                    |                    | Mascot     |             |                   |
|    | 1597.692                                                                                               | 1597.8212    | 0.1292    | 81     | 125        | 138      | ICPTPNQFMFMGGR               |                               |              | Oxidation (M)[10,11]                               |                    | Mascot     |             |                   |
|    | 1597.692                                                                                               | 1597.8212    | 0.1292    | 81     | 125        | 138      | ICPTPNQFMFMGGR               |                               |              | Oxidation (M)[10,11]                               |                    | Mascot     |             |                   |
|    | 1768.8574                                                                                              | 1769.0361    | 0.1787    | 101    | 674        | 688      | EPYMEGVNPKSNK                |                               |              | Oxidation (M)[4]                                   |                    | Mascot     |             |                   |
|    | 1768.8574                                                                                              | 1769.0361    | 0.1787    | 101    | 674        | 688      | EPYMEGVNPKSNK                |                               |              | Oxidation (M)[4]                                   |                    | Mascot     |             |                   |
|    | 2379.1755                                                                                              | 2379.2942    | 0.1187    | 50     | 216        | 235      | NLYFILEGSDAQLYFESE<br>K      |                               |              |                                                    |                    | Mascot     |             |                   |
|    | 2379.1755                                                                                              | 2379.2942    | 0.1187    | 50     | 216        | 235      | NLYFILEGSDAQLYFESE<br>K      |                               |              |                                                    |                    | Mascot     |             |                   |
|    | 2757.5193                                                                                              | 2757.4426    | -0.0767   | -28    | 458        | 482      | ELHVVNALSHVCGQDRT<br>LLASILR |                               |              |                                                    |                    | Mascot     |             |                   |
|    | 2757.5193                                                                                              | 2757.4426    | -0.0767   | -28    | 458        | 482      | ELHVVNALSHVCGQDRT<br>LLASILR |                               |              |                                                    |                    | Mascot     |             |                   |
|    | Gel Idx/Pos                                                                                            | 37/B21       |           |        |            |          | Instr./Gel Origin            | AB4700/110211A                |              | Process Status                                     | Analysis Succeeded |            |             |                   |
|    | Plate (#) Name                                                                                         | [1] 8907     |           |        |            |          | Instrument Sample Name       |                               |              | Spectra                                            | 8                  |            |             |                   |
|    | Rank                                                                                                   | Protein Name |           |        | Species    |          | Accession No.                | Protein MW                    | Protein      | Pep. Count                                         | Protein Score      | Protein pI | Ion Score   | Total Ion C. I. % |
| 1  | Prolyl 4-hydroxylase, alpha polypeptide II [Bos taurus]                                                |              |           |        |            |          | gi 74353841                  | 55523.9                       | 5.64         | 17                                                 | 352                | 100        | 225         | 100               |
|    | Peptide Information                                                                                    |              |           |        |            |          |                              |                               |              |                                                    |                    |            |             |                   |
|    | Calc. Mass                                                                                             | Obsrv. Mass  | ± da      | ± ppm  | Start Seq. | End Seq. | Sequence                     | Ion Score                     | C. I. %      | Modification                                       |                    | Rank       | Result Type |                   |
|    | 919.4995                                                                                               | 919.4921     | -0.0074   | -8     | 390        | 397      | RPFDSGLK                     |                               |              |                                                    |                    | Mascot     |             |                   |
|    | 1045.5524                                                                                              | 1045.5587    | 0.0063    | 6      | 207        | 214      | LEEEREK                      |                               |              |                                                    |                    | Mascot     |             |                   |
|    | 1066.5891                                                                                              | 1066.5891    | 0         | 0      | 325        | 334      | TGVLTVASYR                   |                               |              |                                                    |                    | Mascot     |             |                   |
|    | 1163.5592                                                                                              | 1163.5641    | 0.0049    | 4      | 197        | 206      | AGGNLHYFER                   |                               |              |                                                    |                    | Mascot     |             |                   |
|    | 1166.6165                                                                                              | 1166.6041    | -0.0124   | -11    | 187        | 196      | LLSLDPsher                   |                               |              |                                                    |                    | Mascot     |             |                   |
|    | 1322.7175                                                                                              | 1322.7135    | -0.004    | -3     | 186        | 196      | RLSLDPsher                   |                               |              |                                                    |                    | Mascot     |             |                   |
|    | 1339.7157                                                                                              | 1339.7223    | 0.0066    | 5      | 433        | 443      | GTAVFVYNLLR                  |                               |              |                                                    |                    | Mascot     |             |                   |
|    | 1467.8107                                                                                              | 1467.821     | 0.0103    | 7      | 432        | 443      | KGTAVFVYNLLR                 |                               |              |                                                    |                    | Mascot     |             |                   |
|    | 1467.8107                                                                                              | 1467.821     | 0.0103    | 7      | 432        | 443      | KGTAVFVYNLLR                 | 33                            | 0            |                                                    |                    | Mascot     |             |                   |
|    | 1476.7554                                                                                              | 1476.7561    | 0.0007    | 0      | 390        | 402      | RPFDSGLKTEGGR                |                               |              |                                                    |                    | Mascot     |             |                   |
|    | 1548.6522                                                                                              | 1548.6621    | 0.0099    | 6      | 295        | 306      | YYDVMSEIEIR                  |                               |              |                                                    |                    | Mascot     |             |                   |
|    | 1564.6472                                                                                              | 1564.6506    | 0.0034    | 2      | 295        | 306      | YYDVMSEIEIR                  |                               |              | Oxidation (M)[5]                                   |                    | Mascot     |             |                   |
|    | 1594.7166                                                                                              | 1594.7302    | 0.0136    | 9      | 474        | 487      | GQEFRLPGCSTEVD               | 26                            | 0            | Carbamidomethyl (C)[8]                             |                    | Mascot     |             |                   |
|    | 1594.7166                                                                                              | 1594.7302    | 0.0136    | 9      | 474        | 487      | GQEFRLPGCSTEVD               |                               |              | Carbamidomethyl (C)[8]                             |                    | Mascot     |             |                   |
|    | 1617.7391                                                                                              | 1617.7483    | 0.0092    | 6      | 338        | 351      | SSWLLEDDPVAR                 |                               |              |                                                    |                    | Mascot     |             |                   |
|    | 1802.8707                                                                                              | 1802.8777    | 0.007     | 4      | 72         | 88       | SAADPEGYLHPVNAVYK            |                               |              |                                                    |                    | Mascot     |             |                   |

|           |           |        |   |     |     |                              |     |        |                   |        |
|-----------|-----------|--------|---|-----|-----|------------------------------|-----|--------|-------------------|--------|
| 2208.1448 | 2208.1558 | 0.011  | 5 | 161 | 179 | AQVLDYLSYAVFQLGDLH<br>R      | 108 | 100    |                   | Mascot |
| 2208.1448 | 2208.1558 | 0.011  | 5 | 161 | 179 | AQVLDYLSYAVFQLGDLH<br>R      |     |        |                   | Mascot |
| 2446.1384 | 2446.145  | 0.0066 | 3 | 129 | 148 | SAYNEGYYHTVLWMEQ<br>VLK      |     |        |                   | Mascot |
| 2618.3613 | 2618.3701 | 0.0088 | 3 | 273 | 294 | VPQLLIAPFKEDEWDSP<br>HIVR    | 58  | 99.374 |                   | Mascot |
| 2618.3613 | 2618.3701 | 0.0088 | 3 | 273 | 294 | VPQLLIAPFKEDEWDSP<br>HIVR    |     |        |                   | Mascot |
| 2730.2617 | 2730.272  | 0.0103 | 4 | 366 | 389 | TAELLQVANYGMGGQYE<br>PHFDFSR |     |        |                   | Mascot |
| 2746.2566 | 2746.2708 | 0.0142 | 5 | 366 | 389 | TAELLQVANYGMGGQYE<br>PHFDFSR |     |        | Oxidation (M)[12] | Mascot |

2    prolyl 4-hydroxylase subunit alpha-2 isoform 2 [Bos taurus]    g|226874885    60689.4    5.42    17    350    100    225    100

| Peptide Information |             |         |       |            |          |                              |           |         |                        | Rank | Result Type |
|---------------------|-------------|---------|-------|------------|----------|------------------------------|-----------|---------|------------------------|------|-------------|
| Calc. Mass          | Obsrv. Mass | ± da    | ± ppm | Start Seq. | End Seq. | Sequence                     | Ion Score | C. I. % | Modification           |      |             |
| 919.4995            | 919.4921    | -0.0074 | -8    | 436        | 443      | RPFDSGLK                     |           |         |                        |      | Mascot      |
| 1045.5524           | 1045.5587   | 0.0063  | 6     | 253        | 260      | LLEEREK                      |           |         |                        |      | Mascot      |
| 1066.5891           | 1066.5891   | 0       | 0     | 371        | 380      | TGVLTVASYR                   |           |         |                        |      | Mascot      |
| 1163.5592           | 1163.5641   | 0.0049  | 4     | 243        | 252      | AGGNLHYFER                   |           |         |                        |      | Mascot      |
| 1166.6165           | 1166.6041   | -0.0124 | -11   | 233        | 242      | LLSLDPSHER                   |           |         |                        |      | Mascot      |
| 1322.7175           | 1322.7135   | -0.004  | -3    | 232        | 242      | RLSLDPSHER                   |           |         |                        |      | Mascot      |
| 1339.7157           | 1339.7223   | 0.0066  | 5     | 479        | 489      | GTAVFWYNLLR                  |           |         |                        |      | Mascot      |
| 1467.8107           | 1467.821    | 0.0103  | 7     | 478        | 489      | KGTAVFWYNLLR                 |           |         |                        |      | Mascot      |
| 1467.8107           | 1467.821    | 0.0103  | 7     | 478        | 489      | KGTAVFWYNLLR                 | 33        | 0       |                        |      | Mascot      |
| 1476.7554           | 1476.7561   | 0.0007  | 0     | 436        | 448      | RPFDSGLKTEGNR                |           |         |                        |      | Mascot      |
| 1548.6522           | 1548.6621   | 0.0099  | 6     | 341        | 352      | YYDVMDEEIER                  |           |         |                        |      | Mascot      |
| 1564.6472           | 1564.6506   | 0.0034  | 2     | 341        | 352      | YYDVMDEEIER                  |           |         | Oxidation (M)[5]       |      | Mascot      |
| 1594.7166           | 1594.7302   | 0.0136  | 9     | 520        | 533      | GQEFLRPGSGTEVD               | 26        | 0       | Carbamidomethyl (C)[8] |      | Mascot      |
| 1594.7166           | 1594.7302   | 0.0136  | 9     | 520        | 533      | GQEFLRPGSGTEVD               |           |         | Carbamidomethyl (C)[8] |      | Mascot      |
| 1617.7391           | 1617.7483   | 0.0092  | 6     | 384        | 397      | SSWLEDDDPVVAR                |           |         |                        |      | Mascot      |
| 1802.8707           | 1802.8777   | 0.007   | 4     | 72         | 88       | SAADPEGVLAHPVNAVYK           |           |         |                        |      | Mascot      |
| 2208.1448           | 2208.1558   | 0.011   | 5     | 207        | 225      | AQVLDYLSYAVFQLGDLH<br>R      | 108       | 100     |                        |      | Mascot      |
| 2208.1448           | 2208.1558   | 0.011   | 5     | 207        | 225      | AQVLDYLSYAVFQLGDLH<br>R      |           |         |                        |      | Mascot      |
| 2446.1384           | 2446.145    | 0.0066  | 3     | 175        | 194      | SAYNEGYYHTVLWMEQ<br>VLK      |           |         |                        |      | Mascot      |
| 2618.3613           | 2618.3701   | 0.0088  | 3     | 319        | 340      | VPQLLIAPFKEDEWDSP<br>HIVR    | 58        | 99.374  |                        |      | Mascot      |
| 2618.3613           | 2618.3701   | 0.0088  | 3     | 319        | 340      | VPQLLIAPFKEDEWDSP<br>HIVR    |           |         |                        |      | Mascot      |
| 2730.2617           | 2730.272    | 0.0103  | 4     | 412        | 435      | TAELLQVANYGMGGQYE<br>PHFDFSR |           |         |                        |      | Mascot      |
| 2746.2566           | 2746.2708   | 0.0142  | 5     | 412        | 435      | TAELLQVANYGMGGQYE<br>PHFDFSR |           |         | Oxidation (M)[12]      |      | Mascot      |

3    prolyl 4-hydroxylase subunit alpha-2 isoform 1 [Bos taurus]    g|226874889    60933.6    5.42    15    325    100    225    100

| Peptide Information |             |         |       |            |          |                              |           |         |                        | Rank | Result Type |
|---------------------|-------------|---------|-------|------------|----------|------------------------------|-----------|---------|------------------------|------|-------------|
| Calc. Mass          | Obsrv. Mass | ± da    | ± ppm | Start Seq. | End Seq. | Sequence                     | Ion Score | C. I. % | Modification           |      |             |
| 1045.5524           | 1045.5587   | 0.0063  | 6     | 253        | 260      | LLEEREK                      |           |         |                        |      | Mascot      |
| 1066.5891           | 1066.5891   | 0       | 0     | 371        | 380      | TGVLTVASYR                   |           |         |                        |      | Mascot      |
| 1163.5592           | 1163.5641   | 0.0049  | 4     | 243        | 252      | AGGNLHYFER                   |           |         |                        |      | Mascot      |
| 1166.6165           | 1166.6041   | -0.0124 | -11   | 233        | 242      | LLSLDPSHER                   |           |         |                        |      | Mascot      |
| 1322.7175           | 1322.7135   | -0.004  | -3    | 232        | 242      | RLSLDPSHER                   |           |         |                        |      | Mascot      |
| 1339.7157           | 1339.7223   | 0.0066  | 5     | 481        | 491      | GTAVFWYNLLR                  |           |         |                        |      | Mascot      |
| 1467.8107           | 1467.821    | 0.0103  | 7     | 480        | 491      | KGTAVFWYNLLR                 |           |         |                        |      | Mascot      |
| 1467.8107           | 1467.821    | 0.0103  | 7     | 480        | 491      | KGTAVFWYNLLR                 | 33        | 0       |                        |      | Mascot      |
| 1548.6522           | 1548.6621   | 0.0099  | 6     | 341        | 352      | YYDVMDEEIER                  |           |         |                        |      | Mascot      |
| 1564.6472           | 1564.6506   | 0.0034  | 2     | 341        | 352      | YYDVMDEEIER                  |           |         | Oxidation (M)[5]       |      | Mascot      |
| 1594.7166           | 1594.7302   | 0.0136  | 9     | 522        | 535      | GQEFLRPGSGTEVD               | 26        | 0       | Carbamidomethyl (C)[8] |      | Mascot      |
| 1594.7166           | 1594.7302   | 0.0136  | 9     | 522        | 535      | GQEFLRPGSGTEVD               |           |         | Carbamidomethyl (C)[8] |      | Mascot      |
| 1617.7391           | 1617.7483   | 0.0092  | 6     | 384        | 397      | SSWLEDDDPVVAR                |           |         |                        |      | Mascot      |
| 1802.8707           | 1802.8777   | 0.007   | 4     | 72         | 88       | SAADPEGVLAHPVNAVYK           |           |         |                        |      | Mascot      |
| 2208.1448           | 2208.1558   | 0.011   | 5     | 207        | 225      | AQVLDYLSYAVFQLGDLH<br>R      | 108       | 100     |                        |      | Mascot      |
| 2208.1448           | 2208.1558   | 0.011   | 5     | 207        | 225      | AQVLDYLSYAVFQLGDLH<br>R      |           |         |                        |      | Mascot      |
| 2446.1384           | 2446.145    | 0.0066  | 3     | 175        | 194      | SAYNEGYYHTVLWMEQ<br>VLK      |           |         |                        |      | Mascot      |
| 2618.3613           | 2618.3701   | 0.0088  | 3     | 319        | 340      | VPQLLIAPFKEDEWDSP<br>HIVR    | 58        | 99.374  |                        |      | Mascot      |
| 2618.3613           | 2618.3701   | 0.0088  | 3     | 319        | 340      | VPQLLIAPFKEDEWDSP<br>HIVR    |           |         |                        |      | Mascot      |
| 2730.2617           | 2730.272    | 0.0103  | 4     | 412        | 435      | TAELLQVANYGMGGQYE<br>PHFDFSR |           |         |                        |      | Mascot      |
| 2746.2566           | 2746.2708   | 0.0142  | 5     | 412        | 435      | TAELLQVANYGMGGQYE<br>PHFDFSR |           |         | Oxidation (M)[12]      |      | Mascot      |

4    Chain Q, Ca Model Of Bovine TricCCT DERIVED FROM A 4.0 ANGSTROM Cryo-Em Map    g|291191144    55732.5    5.33    13    290    100    214    100

| Peptide Information |             |         |       |            |          |                               |           |         |                        | Rank | Result Type |
|---------------------|-------------|---------|-------|------------|----------|-------------------------------|-----------|---------|------------------------|------|-------------|
| Calc. Mass          | Obsrv. Mass | ± da    | ± ppm | Start Seq. | End Seq. | Sequence                      | Ion Score | C. I. % | Modification           |      |             |
| 885.5152            | 885.5308    | 0.0156  | 18    | 311        | 319      | TVGATALPR                     |           |         |                        |      | Mascot      |
| 908.5022            | 908.4971    | -0.0051 | -6    | 292        | 298      | YNIMLVR                       |           |         |                        |      | Mascot      |
| 1150.5891           | 1150.5912   | 0.0021  | 2     | 425        | 434      | FAEAFEAIRP                    | 78        | 99.994  |                        |      | Mascot      |
| 1150.5891           | 1150.5912   | 0.0021  | 2     | 425        | 434      | FAEAFEAIRP                    |           |         |                        |      | Mascot      |
| 1168.5996           | 1168.5979   | -0.0017 | -1    | 156        | 165      | QYGNEVFLAK                    |           |         |                        |      | Mascot      |
| 1278.6841           | 1278.6884   | 0.0043  | 3     | 424        | 434      | KFAEAFEAIRP                   |           |         |                        |      | Mascot      |
| 1307.6378           | 1307.6438   | 0.006   | 5     | 5          | 15       | HFGGLEAAVYR                   | 93        | 100     |                        |      | Mascot      |
| 1307.6378           | 1307.6438   | 0.006   | 5     | 5          | 15       | HFGGLEAAVYR                   |           |         |                        |      | Mascot      |
| 1333.7474           | 1333.7542   | 0.0068  | 5     | 47         | 58       | LFVTNDAATLR                   |           |         |                        |      | Mascot      |
| 1400.7491           | 1400.7587   | 0.0096  | 7     | 266        | 280      | AIADTGANVVVTGGR               |           |         |                        |      | Mascot      |
| 2122.0935           | 2122.1028   | 0.0093  | 4     | 281        | 298      | VADMALHYANKYNIMLVR            |           |         |                        |      | Mascot      |
| 2130.0859           | 2130.0925   | 0.0066  | 3     | 137        | 155      | NLRDVDEVSSLLHTSVMSK           |           |         |                        |      | Mascot      |
| 2146.0808           | 2146.0933   | 0.0125  | 6     | 137        | 155      | NLRDVDEVSSLLHTSVMSK           |           |         | Oxidation (M)[17]      |      | Mascot      |
| 2186.0798           | 2186.0881   | 0.0083  | 4     | 406        | 424      | QITSYGETCPGLEQYAIK<br>K       |           |         | Carbamidomethyl (C)[9] |      | Mascot      |
| 2473.2292           | 2473.2405   | 0.0113  | 5     | 166        | 187      | LIAQACVSIFPDSGHFNV<br>DNIR    | 43        | 80.963  | Carbamidomethyl (C)[6] |      | Mascot      |
| 2473.2292           | 2473.2405   | 0.0113  | 5     | 166        | 187      | LIAQACVSIFPDSGHFNV<br>DNIR    |           |         | Carbamidomethyl (C)[6] |      | Mascot      |
| 2746.3804           | 2746.2708   | -0.1096 | -40   | 166        | 190      | LIAQACVSIFPDSGHFNV<br>DNIRVCK |           |         |                        |      | Mascot      |

5    T-complex protein 1 subunit theta [Bos taurus]    g|75812922    59571.4    5.4    13    287    100    214    100

| Peptide Information |             |         |       |            |          |            |           |         |              | Rank | Result Type |
|---------------------|-------------|---------|-------|------------|----------|------------|-----------|---------|--------------|------|-------------|
| Calc. Mass          | Obsrv. Mass | ± da    | ± ppm | Start Seq. | End Seq. | Sequence   | Ion Score | C. I. % | Modification |      |             |
| 885.5152            | 885.5308    | 0.0156  | 18    | 327        | 335      | TVGATALPR  |           |         |              |      | Mascot      |
| 908.5022            | 908.4971    | -0.0051 | -6    | 308        | 314      | YNIMLVR    |           |         |              |      | Mascot      |
| 1150.5891           | 1150.5912   | 0.0021  | 2     | 441        | 450      | FAEAFEAIRP | 78        | 99.994  |              |      | Mascot      |



[illegible]

| (P131) [Homo sapiens]      |                                                                                        |         |               |            |                  |                                                |                 |                 |                         |                        |                      |             |    |    |   |    |   |  |
|----------------------------|----------------------------------------------------------------------------------------|---------|---------------|------------|------------------|------------------------------------------------|-----------------|-----------------|-------------------------|------------------------|----------------------|-------------|----|----|---|----|---|--|
| Peptide Information        |                                                                                        |         |               |            |                  |                                                |                 |                 |                         |                        |                      |             |    |    |   |    |   |  |
| Calc. Mass                 | Obsrv. Mass                                                                            | ± da    | ± ppm         | Start Seq. | End Seq.         | Sequence                                       | Ion Score       | C. I. %         | Modification            |                        | Rank                 | Result Type |    |    |   |    |   |  |
| 1178.6178                  | 1178.6628                                                                              | -0.045  | 38            | 30         | 39               | IPPHHPHTSR                                     |                 |                 |                         |                        |                      | Mascot      |    |    |   |    |   |  |
| 1517.7893                  | 1517.7419                                                                              | -0.0474 | -31           | 47         | 60               | GGMIVDPLRSGGFPR                                |                 |                 | Oxidation (M)[3]        |                        |                      | Mascot      |    |    |   |    |   |  |
| 1517.7893                  | 1517.7419                                                                              | -0.0474 | -31           | 47         | 60               | GGMIVDPLRSGGFPR                                |                 |                 | Oxidation (M)[3]        |                        |                      | Mascot      |    |    |   |    |   |  |
| 1597.8333                  | 1597.83                                                                                | -0.0033 | -2            | 16         | 29               | EFPPTAREVDPLR                                  |                 |                 |                         |                        |                      | Mascot      |    |    |   |    |   |  |
| 1597.8333                  | 1597.83                                                                                | -0.0033 | -2            | 16         | 29               | EFPPTAREVDPLR                                  |                 |                 |                         |                        |                      | Mascot      |    |    |   |    |   |  |
| 1940.015                   | 1940.1074                                                                              | 0.0924  | 48            | 30         | 45               | IPPHHPHTSRPPWPR                                |                 |                 |                         |                        |                      | Mascot      |    |    |   |    |   |  |
| 1940.015                   | 1940.1074                                                                              | 0.0924  | 48            | 30         | 45               | IPPHHPHTSRPPWPR                                |                 |                 |                         |                        |                      | Mascot      |    |    |   |    |   |  |
| 9                          | PREDICTED: rab GDP dissociation inhibitor alpha-like isoform 2 [Calitrix jacchus]      |         |               |            |                  |                                                |                 |                 |                         | g l296236758           | 45540.5              | 4.86        | 3  | 46 | 0 | 27 | 0 |  |
| Peptide Information        |                                                                                        |         |               |            |                  |                                                |                 |                 |                         |                        |                      |             |    |    |   |    |   |  |
| Calc. Mass                 | Obsrv. Mass                                                                            | ± da    | ± ppm         | Start Seq. | End Seq.         | Sequence                                       | Ion Score       | C. I. %         | Modification            |                        | Rank                 | Result Type |    |    |   |    |   |  |
| 1517.6875                  | 1517.7419                                                                              | 0.0544  | 36            | 379        | 391              | MAGTAFDFENMKR                                  |                 |                 |                         |                        |                      | Mascot      |    |    |   |    |   |  |
| 1517.6875                  | 1517.7419                                                                              | 0.0544  | 36            | 378        | 390              | RMAGTAFDFENMK                                  | 4               | 0               |                         |                        |                      | Mascot      |    |    |   |    |   |  |
| 2141.1064                  | 2141.168                                                                               | 0.0616  | 29            | 177        | 195              | SPLYLYPLGLGELPGQFA<br>R                        | 27              | 0               |                         |                        |                      | Mascot      |    |    |   |    |   |  |
| 2141.1064                  | 2141.168                                                                               | 0.0616  | 29            | 177        | 195              | SPLYLYPLGLGELPGQFA<br>R                        |                 |                 |                         |                        |                      | Mascot      |    |    |   |    |   |  |
| 10                         | PREDICTED: leucine-rich repeat serine/threonine-protein kinase 2-like [Macaca mulatta] |         |               |            |                  |                                                |                 |                 |                         | g l297262113           | 274531.6             | 6.31        | 13 | 45 | 0 |    |   |  |
| Peptide Information        |                                                                                        |         |               |            |                  |                                                |                 |                 |                         |                        |                      |             |    |    |   |    |   |  |
| Calc. Mass                 | Obsrv. Mass                                                                            | ± da    | ± ppm         | Start Seq. | End Seq.         | Sequence                                       | Ion Score       | C. I. %         | Modification            |                        | Rank                 | Result Type |    |    |   |    |   |  |
| 1109.4867                  | 1109.5817                                                                              | 0.095   | 86            | 2216       | 2225             | NVMWGCGGTK                                     |                 |                 | Carbamidomethyl (C)[7]  |                        |                      | Mascot      |    |    |   |    |   |  |
| 1178.6416                  | 1178.6628                                                                              | 0.0212  | 18            | 1503       | 1512             | TINESLNFK                                      |                 |                 |                         |                        |                      | Mascot      |    |    |   |    |   |  |
| 1382.8114                  | 1382.7759                                                                              | -0.0355 | -26           | 19         | 30               | LIVRLNNVGEQG                                   |                 |                 |                         |                        |                      | Mascot      |    |    |   |    |   |  |
| 1382.8114                  | 1382.7759                                                                              | -0.0355 | -26           | 19         | 30               | LIVRLNNVGEQG                                   |                 |                 |                         |                        |                      | Mascot      |    |    |   |    |   |  |
| 1388.7627                  | 1388.6881                                                                              | -0.0846 | -68           | 1540       | 1551             | NNVEPFYIDKG                                    |                 |                 |                         |                        |                      | Mascot      |    |    |   |    |   |  |
| 1517.7603                  | 1517.7419                                                                              | -0.0184 | -12           | 2286       | 2297             | LCELDICVHLR                                    |                 |                 | Carbamidomethyl (C)[2]  |                        |                      | Mascot      |    |    |   |    |   |  |
| 1517.8145                  | 1517.7419                                                                              | -0.0726 | -48           | 74         | 87               | VASVOQQVGSLLCK                                 |                 |                 |                         |                        |                      | Mascot      |    |    |   |    |   |  |
| 1597.8519                  | 1597.83                                                                                | -0.0219 | -14           | 2347       | 2359             | VIRIIFYDCSVR                                   |                 |                 |                         |                        |                      | Mascot      |    |    |   |    |   |  |
| 1597.8948                  | 1597.83                                                                                | -0.0648 | -41           | 1291       | 1303             | LSKIWDLFLDELK                                  |                 |                 |                         |                        |                      | Mascot      |    |    |   |    |   |  |
| 1939.9438                  | 1940.1074                                                                              | 0.1636  | 84            | 794        | 812              | LALDMANNISCLGGFCIG<br>K                        |                 |                 |                         |                        |                      | Mascot      |    |    |   |    |   |  |
| 1939.9438                  | 1940.1074                                                                              | 0.1636  | 84            | 794        | 812              | LALDMANNISCLGGFCIG<br>K                        |                 |                 |                         |                        |                      | Mascot      |    |    |   |    |   |  |
| 1941.9812                  | 1942.1068                                                                              | 0.1256  | 65            | 249        | 265              | CYNIVVEAMKAFFPEIK                              |                 |                 |                         |                        |                      | Mascot      |    |    |   |    |   |  |
| 2159.0227                  | 2159.1475                                                                              | 0.1248  | 58            | 1200       | 1218             | SLDMSNDIOQLPGPAH<br>WK                         |                 |                 |                         |                        |                      | Mascot      |    |    |   |    |   |  |
| 2280.1289                  | 2280.2393                                                                              | 0.1104  | 48            | 996        | 1015             | DIDALSQKSICISGHLEHL<br>EK                      |                 |                 | Carbamidomethyl (C)[10] |                        |                      | Mascot      |    |    |   |    |   |  |
| 2351.199                   | 2351.2563                                                                              | 0.0573  | 24            | 413        | 433              | EVFOASANALSTLLEQN/<br>NFR                      |                 |                 |                         |                        |                      | Mascot      |    |    |   |    |   |  |
| Gel Idx/Pos Plate [#] Name | 38/B23 [1] 8907                                                                        |         |               |            |                  | Instr./Gel Origin Instrument Sample Name       | AB4700/110211A  |                 |                         | Process Status Spectra | Analysis Succeeded 8 |             |    |    |   |    |   |  |
| Rank                       | Protein Name                                                                           | Species | Accession No. | Protein MW | Protein PI Count | Protein Score                                  | Protein C. I. % | Total Ion Score | Total Ion C. I. %       |                        |                      |             |    |    |   |    |   |  |
| 1                          | Chain D, Crystall Structure Of Bovine F1-C8 Sub-Complex Of Atp Synthase                |         |               |            | g l306991567     | 50283.3                                        | 4.96            | 21              | 784                     | 100                    | 540                  | 100         |    |    |   |    |   |  |
| Peptide Information        |                                                                                        |         |               |            |                  |                                                |                 |                 |                         |                        |                      |             |    |    |   |    |   |  |
| Calc. Mass                 | Obsrv. Mass                                                                            | ± da    | ± ppm         | Start Seq. | End Seq.         | Sequence                                       | Ion Score       | C. I. %         | Modification            |                        | Rank                 | Result Type |    |    |   |    |   |  |
| 927.5258                   | 927.5362                                                                               | 0.0104  | 11            | 67         | 75               | VLDSGAPIR                                      |                 |                 |                         |                        |                      | Mascot      |    |    |   |    |   |  |
| 1038.5942                  | 1038.6096                                                                              | 0.0154  | 15            | 76         | 85               | IPVPGETLGR                                     |                 |                 |                         |                        |                      | Mascot      |    |    |   |    |   |  |
| 1262.6409                  | 1262.657                                                                               | 0.0161  | 13            | 52         | 63               | TIAMDGTGLVR                                    |                 |                 |                         |                        |                      | Mascot      |    |    |   |    |   |  |
| 1278.6359                  | 1278.6542                                                                              | 0.0183  | 14            | 52         | 63               | TIAMDGTGLVR                                    |                 |                 | Oxidation (M)[4]        |                        |                      | Mascot      |    |    |   |    |   |  |
| 1385.7094                  | 1385.7295                                                                              | 0.0201  | 15            | 86         | 97               | IMNVIGEPIDER                                   |                 |                 |                         |                        |                      | Mascot      |    |    |   |    |   |  |
| 1401.7042                  | 1401.7147                                                                              | 0.0105  | 7             | 86         | 97               | IMNVIGEPIDER                                   |                 |                 | Oxidation (M)[2]        |                        |                      | Mascot      |    |    |   |    |   |  |
| 1406.681                   | 1406.702                                                                               | 0.021   | 15            | 168        | 181              | AHGGVSVFAGVGER                                 | 123             | 100             |                         |                        |                      | Mascot      |    |    |   |    |   |  |
| 1406.681                   | 1406.702                                                                               | 0.021   | 15            | 168        | 181              | AHGGVSVFAGVGER                                 |                 |                 |                         |                        |                      | Mascot      |    |    |   |    |   |  |
| 1435.7539                  | 1435.7772                                                                              | 0.0233  | 16            | 253        | 266              | FTQAGSEVSALLGR                                 |                 |                 |                         |                        |                      | Mascot      |    |    |   |    |   |  |
| 1435.7539                  | 1435.7772                                                                              | 0.0233  | 16            | 253        | 266              | FTQAGSEVSALLGR                                 | 105             | 100             |                         |                        |                      | Mascot      |    |    |   |    |   |  |
| 1439.7893                  | 1439.8098                                                                              | 0.0205  | 14            | 224        | 236              | VALGTLYVAEYFR                                  |                 |                 |                         |                        |                      | Mascot      |    |    |   |    |   |  |
| 1457.8396                  | 1457.8481                                                                              | 0.0085  | 6             | 155        | 167              | TLLIMELNNVAK                                   |                 |                 |                         |                        |                      | Mascot      |    |    |   |    |   |  |
| 1575.8159                  | 1575.8386                                                                              | 0.0227  | 14            | 52         | 66               | TIAMDGTGLVRGQK                                 |                 |                 |                         |                        |                      | Mascot      |    |    |   |    |   |  |
| 1601.8104                  | 1601.8376                                                                              | 0.0272  | 17            | 207        | 221              | VALVYGOMNEPPGAR                                |                 |                 |                         |                        |                      | Mascot      |    |    |   |    |   |  |
| 1601.8104                  | 1601.8376                                                                              | 0.0272  | 17            | 207        | 221              | VALVYGOMNEPPGAR                                | 74              | 99.983          |                         |                        |                      | Mascot      |    |    |   |    |   |  |
| 1617.8053                  | 1617.8232                                                                              | 0.0179  | 11            | 207        | 221              | VALVYGOMNEPPGAR                                |                 |                 | Oxidation (M)[8]        |                        |                      | Mascot      |    |    |   |    |   |  |
| 1650.9174                  | 1650.9436                                                                              | 0.0262  | 16            | 37         | 51               | LVLEVAQHLGESTVR                                |                 |                 |                         |                        |                      | Mascot      |    |    |   |    |   |  |
| 1650.9174                  | 1650.9436                                                                              | 0.0262  | 16            | 37         | 51               | LVLEVAQHLGESTVR                                | 108             | 100             |                         |                        |                      | Mascot      |    |    |   |    |   |  |
| 1780.9625                  | 1780.9902                                                                              | 0.0277  | 16            | 86         | 101              | IMNVIGEPIDERGPIK                               |                 |                 |                         |                        |                      | Mascot      |    |    |   |    |   |  |
| 1796.9574                  | 1796.9805                                                                              | 0.0231  | 13            | 86         | 101              | IMNVIGEPIDERGPIK                               |                 |                 | Oxidation (M)[2]        |                        |                      | Mascot      |    |    |   |    |   |  |
| 1815.8694                  | 1815.8987                                                                              | 0.0293  | 16            | 349        | 364              | IMDPNVGSEHYDVAR                                |                 |                 |                         |                        |                      | Mascot      |    |    |   |    |   |  |
| 1831.8643                  | 1831.8866                                                                              | 0.0223  | 12            | 349        | 364              | IMDPNVGSEHYDVAR                                |                 |                 | Oxidation (M)[2]        |                        |                      | Mascot      |    |    |   |    |   |  |
| 1921.9655                  | 1921.9979                                                                              | 0.0324  | 17            | 237        | 252              | DOEGDVLFFDNIWR                                 |                 |                 |                         |                        |                      | Mascot      |    |    |   |    |   |  |
| 1947.1022                  | 1947.1322                                                                              | 0.03    | 15            | 67         | 85               | VLDSGAPIRIPVGPETLGR                            |                 |                 |                         |                        |                      | Mascot      |    |    |   |    |   |  |
| 1947.1022                  | 1947.1322                                                                              | 0.03    | 15            | 67         | 85               | VLDSGAPIRIPVGPETLGR                            | 40              | 57.812          |                         |                        |                      | Mascot      |    |    |   |    |   |  |
| 1988.0334                  | 1988.0614                                                                              | 0.028   | 14            | 330        | 348              | AI AELGIYPAVDPLDSTSR                           | 89              | 100             |                         |                        |                      | Mascot      |    |    |   |    |   |  |
| 1988.0334                  | 1988.0614                                                                              | 0.028   | 14            | 330        | 348              | AI AELGIYPAVDPLDSTSR                           |                 |                 |                         |                        |                      | Mascot      |    |    |   |    |   |  |
| 2005.0541                  | 2005.0811                                                                              | 0.027   | 13            | 405        | 422              | FLSQPFQVAEYFTGHLGK                             |                 |                 |                         |                        |                      | Mascot      |    |    |   |    |   |  |
| 2266.0842                  | 2266.1208                                                                              | 0.0366  | 16            | 267        | 287              | IPSAVGYOPTLATDMGT<br>MQER                      |                 |                 |                         |                        |                      | Mascot      |    |    |   |    |   |  |
| 2282.0791                  | 2282.1152                                                                              | 0.0361  | 16            | 267        | 287              | IPSAVGYOPTLATDMGT<br>MQER                      |                 |                 | Oxidation (M)[15]       |                        |                      | Mascot      |    |    |   |    |   |  |
| 2298.074                   | 2298.1096                                                                              | 0.0356  | 15            | 267        | 287              | IPSAVGYOPTLATDMGT<br>MQER                      |                 |                 | Oxidation (M)[15,18]    |                        |                      | Mascot      |    |    |   |    |   |  |
| 2318.1445                  | 2318.1768                                                                              | 0.0323  | 14            | 182        | 201              | TREGNDLYHEMIESGVIN<br>LK                       |                 |                 |                         |                        |                      | Mascot      |    |    |   |    |   |  |
| 2334.1394                  | 2334.175                                                                               | 0.0356  | 15            | 182        | 201              | TREGNDLYHEMIESGVIN<br>LK                       |                 |                 | Oxidation (M)[11]       |                        |                      | Mascot      |    |    |   |    |   |  |
| 2675.3809                  | 2675.4189                                                                              | 0.038   | 14            | 375        | 398              | SLQDIIAIGMDLSEEDK<br>LTVSR                     |                 |                 |                         |                        |                      | Mascot      |    |    |   |    |   |  |
| 2691.3757                  | 2691.4209                                                                              | 0.0452  | 17            | 375        | 398              | SLQDIIAIGMDLSEEDK<br>LTVSR                     |                 |                 | Oxidation (M)[11]       |                        |                      | Mascot      |    |    |   |    |   |  |
| 3842.981                   | 3843.0251                                                                              | 0.0441  | 11            | 293        | 329              | KGSITSVOQIYVPADDLT<br>DPAPATTFHAHLDATTVLS<br>R |                 |                 |                         |                        |                      | Mascot      |    |    |   |    |   |  |
| 2                          | Chain D, Bovine Mitochondrial F1-ATPase Complexed With Aurovertin B                    |         |               |            | g l1827812       | 51673                                          | 5               | 21              | 782                     | 100                    | 540                  | 100         |    |    |   |    |   |  |
| Peptide Information        |                                                                                        |         |               |            |                  |                                                |                 |                 |                         |                        |                      |             |    |    |   |    |   |  |
| Calc. Mass                 | Obsrv. Mass                                                                            | ± da    | ± ppm         | Start Seq. | End Seq.         | Sequence                                       | Ion Score       | C. I. %         | Modification            |                        | Rank                 | Result Type |    |    |   |    |   |  |
| 927.5258                   | 927.5362                                                                               | 0.0104  | 11            | 75         | 87               | VLDSGAPIR                                      |                 |                 |                         |                        |                      | Mascot      |    |    |   |    |   |  |
| 1038.5942                  | 1038.6096                                                                              | 0.0154  | 15            | 88         | 97               | IPVPGETLGR                                     |                 |                 |                         |                        |                      | Mascot      |    |    |   |    |   |  |
| 1262.6409                  | 1262.657                                                                               | 0.0161  | 13            | 64         | 75               | TIAMDGTGLVR                                    |                 |                 |                         |                        |                      | Mascot      |    |    |   |    |   |  |
| 1278.6359                  | 1278.6542                                                                              | 0.0183  | 14            | 64         | 75               | TIAMDGTGLVR                                    |                 |                 | Oxidation (M)[4]        |                        |                      | Mascot      |    |    |   |    |   |  |
| 1385.7094                  | 1385.7295                                                                              | 0.0201  | 15            | 98         | 109              | IMNVIGEPIDER                                   |                 |                 |                         |                        |                      | Mascot      |    |    |   |    |   |  |
| 1401.7042                  | 1406.702                                                                               | 0.021   | 15            | 180        | 193              | AHGGVSVFAGVGER                                 | 123             | 100             |                         |                        |                      | Mascot      |    |    |   |    |   |  |
| 1406.681                   | 1406.702                                                                               | 0.021   | 15            | 180        | 193              | AHGGVSVFAGVGER                                 |                 |                 |                         |                        |                      | Mascot      |    |    |   |    |   |  |
| 1435.7539                  | 1435.7772                                                                              | 0.0233  | 16            | 265        | 278              | FTQAGSEVSALLGR                                 |                 |                 |                         |                        |                      | Mascot      |    |    |   |    |   |  |

|   |                                                                    |             |         |      |    |     |     |     |     |
|---|--------------------------------------------------------------------|-------------|---------|------|----|-----|-----|-----|-----|
| 3 | ATP synthase subunit beta, mitochondrial precursor<br>[Bos taurus] | gi 28461221 | 56248.6 | 5.15 | 21 | 774 | 100 | 540 | 100 |
|---|--------------------------------------------------------------------|-------------|---------|------|----|-----|-----|-----|-----|

|   |                                                                                                   |            |         |      |    |     |     |     |     |
|---|---------------------------------------------------------------------------------------------------|------------|---------|------|----|-----|-----|-----|-----|
| 4 | Chain E, The Structure Of Bovine F1-Atpase Covalently Inhibited With 4-Chloro-7-Nitrobenzofurazan | gij3660252 | 51396.9 | 4.97 | 20 | 762 | 100 | 540 | 100 |
|---|---------------------------------------------------------------------------------------------------|------------|---------|------|----|-----|-----|-----|-----|

| Peptide Information |             |      |       |       |     |          |     |         |              |  | Rank | Result Type |
|---------------------|-------------|------|-------|-------|-----|----------|-----|---------|--------------|--|------|-------------|
| Calc. Mass          | Obsrv. Mass | ± da | ± ppm | Start | End | Sequence | Ion | C. I. % | Modification |  |      |             |

|           |           |        |    |     |     |                              |    |        |                      |  |        |
|-----------|-----------|--------|----|-----|-----|------------------------------|----|--------|----------------------|--|--------|
| 1947.1022 | 1947.1322 | 0.03   | 15 | 79  | 97  | R<br>VLDSGAPIRIPVGPETLG<br>R | 40 | 57.812 |                      |  | Mascot |
| 1988.0334 | 1988.0614 | 0.028  | 14 | 342 | 360 | AIAELGIYPAVDPLDSTSR          | 89 | 100    |                      |  | Mascot |
| 1988.0334 | 1988.0614 | 0.028  | 14 | 342 | 360 | AIAELGIYPAVDPLDSTSR          |    |        |                      |  | Mascot |
| 2005.0541 | 2005.0811 | 0.027  | 13 | 417 | 434 | FLSQPFQVAEVFTGHLG<br>K       |    |        |                      |  | Mascot |
| 2266.0842 | 2266.1208 | 0.0366 | 16 | 279 | 299 | IPSAVGYOPTLATDMGT<br>MQER    |    |        |                      |  | Mascot |
| 2282.0791 | 2282.1152 | 0.0361 | 16 | 279 | 299 | IPSAVGYOPTLATDMGT<br>MQER    |    |        | Oxidation (M)[15]    |  | Mascot |
| 2298.074  | 2298.1096 | 0.0356 | 15 | 279 | 299 | IPSAVGYOPTLATDMGT<br>MQER    |    |        | Oxidation (M)[15,18] |  | Mascot |
| 2318.1445 | 2318.1768 | 0.0323 | 14 | 194 | 213 | TREGNDLYHEMIESGVIN<br>LK     |    |        |                      |  | Mascot |
| 2334.1394 | 2334.175  | 0.0356 | 15 | 194 | 213 | TREGNDLYHEMIESGVIN<br>LK     |    |        | Oxidation (M)[11]    |  | Mascot |
| 2675.3809 | 2675.4189 | 0.038  | 14 | 387 | 410 | SLODIIALGMDELSEEDK<br>LTVSR  |    |        |                      |  | Mascot |
| 2691.3757 | 2691.4209 | 0.0452 | 17 | 387 | 410 | SLODIIALGMDELSEEDK<br>LTVSR  |    |        | Oxidation (M)[11]    |  | Mascot |

5 Chain D, Bovine F1-Atpase Inhibited By Dcdd (Dicyclohexylcarbodiimide) gjl11514059 51655 5.03 20 760 100 540 100

Peptide Information

| Calc. Mass | Obsrv. Mass | ± da   | ± ppm | Start Seq. | End Seq. | Sequence                                       | Ion Score | C. I. % | Modification         | Rank | Result Type |
|------------|-------------|--------|-------|------------|----------|------------------------------------------------|-----------|---------|----------------------|------|-------------|
| 927.5258   | 927.5362    | 0.0104 | 11    | 79         | 87       | VLDSGAPIR                                      |           |         |                      |      | Mascot      |
| 1038.5942  | 1038.6096   | 0.0154 | 15    | 88         | 97       | IPVGPETLGR                                     |           |         |                      |      | Mascot      |
| 1262.6409  | 1262.657    | 0.0161 | 13    | 64         | 75       | TIAMDGTEGLVR                                   |           |         |                      |      | Mascot      |
| 1278.6359  | 1278.6542   | 0.0183 | 14    | 64         | 75       | TIAMDGTEGLVR                                   |           |         | Oxidation (M)[4]     |      | Mascot      |
| 1385.7094  | 1385.7295   | 0.0201 | 15    | 98         | 109      | IMNVGEPIDER                                    |           |         |                      |      | Mascot      |
| 1401.7042  | 1401.7147   | 0.0105 | 7     | 98         | 109      | IMNVGEPIDER                                    |           |         | Oxidation (M)[2]     |      | Mascot      |
| 1406.681   | 1406.702    | 0.021  | 15    | 180        | 193      | AHGGYSVFAGVGER                                 | 123       | 100     |                      |      | Mascot      |
| 1406.681   | 1406.702    | 0.021  | 15    | 180        | 193      | AHGGYSVFAGVGER                                 |           |         |                      |      | Mascot      |
| 1435.7539  | 1435.7772   | 0.0233 | 16    | 265        | 278      | FTQAGSEVSALLGR                                 |           |         |                      |      | Mascot      |
| 1435.7539  | 1435.7772   | 0.0233 | 16    | 265        | 278      | FTQAGSEVSALLGR                                 | 105       | 100     |                      |      | Mascot      |
| 1439.7893  | 1439.8098   | 0.0205 | 14    | 236        | 248      | VALTGLTVAEYFR                                  |           |         |                      |      | Mascot      |
| 1457.8396  | 1457.8481   | 0.0085 | 6     | 167        | 179      | TVLIMELINNAK                                   |           |         |                      |      | Mascot      |
| 1575.8159  | 1575.8386   | 0.0227 | 14    | 64         | 78       | TIAMDGTEGLVRGQK                                |           |         |                      |      | Mascot      |
| 1601.8104  | 1601.8376   | 0.0272 | 17    | 219        | 233      | VALVYQGMNEPPGAR                                |           |         |                      |      | Mascot      |
| 1601.8104  | 1601.8376   | 0.0272 | 17    | 219        | 233      | VALVYQGMNEPPGAR                                | 74        | 99.983  |                      |      | Mascot      |
| 1617.8053  | 1617.8232   | 0.0179 | 11    | 219        | 233      | VALVYQGMNEPPGAR                                |           |         | Oxidation (M)[8]     |      | Mascot      |
| 1650.9174  | 1650.9436   | 0.0262 | 16    | 49         | 63       | LVLVEAQHLEGSTVR                                |           |         |                      |      | Mascot      |
| 1650.9174  | 1650.9436   | 0.0262 | 16    | 49         | 63       | LVLVEAQHLEGSTVR                                | 108       | 100     |                      |      | Mascot      |
| 1780.9625  | 1780.9902   | 0.0277 | 16    | 98         | 113      | IMNVGEPIDERGPIK                                |           |         |                      |      | Mascot      |
| 1796.9574  | 1796.9805   | 0.0231 | 13    | 98         | 113      | IMNVGEPIDERGPIK                                |           |         | Oxidation (M)[2]     |      | Mascot      |
| 1815.8694  | 1815.8987   | 0.0293 | 16    | 361        | 376      | IMDPNIVGSEHYDVAR                               |           |         |                      |      | Mascot      |
| 1831.8643  | 1831.8866   | 0.0223 | 12    | 361        | 376      | IMDPNIVGSEHYDVAR                               |           |         | Oxidation (M)[2]     |      | Mascot      |
| 1921.9655  | 1921.9979   | 0.0324 | 17    | 249        | 264      | DOEGQDVLLFDINIFR                               |           |         |                      |      | Mascot      |
| 1947.1022  | 1947.1322   | 0.03   | 15    | 79         | 97       | VLDSGAPIRIPVGPETLG<br>R                        | 40        | 57.812  |                      |      | Mascot      |
| 1947.1022  | 1947.1322   | 0.03   | 15    | 79         | 97       | VLDSGAPIRIPVGPETLG<br>R                        | 40        | 57.812  |                      |      | Mascot      |
| 1988.0334  | 1988.0614   | 0.028  | 14    | 342        | 360      | AIAELGIYPAVDPLDSTSR                            | 89        | 100     |                      |      | Mascot      |
| 1988.0334  | 1988.0614   | 0.028  | 14    | 342        | 360      | AIAELGIYPAVDPLDSTSR                            |           |         |                      |      | Mascot      |
| 2005.0541  | 2005.0811   | 0.027  | 13    | 417        | 434      | FLSQPFQVAEVFTGHLG<br>K                         |           |         |                      |      | Mascot      |
| 2266.0842  | 2266.1208   | 0.0366 | 16    | 279        | 299      | IPSAVGYOPTLATDMGT<br>MQER                      |           |         |                      |      | Mascot      |
| 2282.0791  | 2282.1152   | 0.0361 | 16    | 279        | 299      | IPSAVGYOPTLATDMGT<br>MQER                      |           |         | Oxidation (M)[15]    |      | Mascot      |
| 2298.074   | 2298.1096   | 0.0356 | 15    | 279        | 299      | IPSAVGYOPTLATDMGT<br>MQER                      |           |         | Oxidation (M)[15,18] |      | Mascot      |
| 2675.3809  | 2675.4189   | 0.038  | 14    | 387        | 410      | SLODIIALGMDELSEEDK<br>LTVSR                    |           |         |                      |      | Mascot      |
| 2691.3757  | 2691.4209   | 0.0452 | 17    | 387        | 410      | SLODIIALGMDELSEEDK<br>LTVSR                    |           |         | Oxidation (M)[11]    |      | Mascot      |
| 3842.981   | 3843.0251   | 0.0441 | 11    | 305        | 341      | KGSIITSVQAIYVPADDLT<br>DPAPATTFAHLDATTVLS<br>R |           |         |                      |      | Mascot      |

6 mitochondrial ATP synthase, H+ transporting F1 complex beta subunit [Sus scrofa] gjl89574051 47059.6 4.99 19 710 100 499 100

Peptide Information

| Calc. Mass | Obsrv. Mass | ± da   | ± ppm | Start Seq. | End Seq. | Sequence                                       | Ion Score | C. I. % | Modification         | Rank | Result Type |
|------------|-------------|--------|-------|------------|----------|------------------------------------------------|-----------|---------|----------------------|------|-------------|
| 1038.5942  | 1038.6096   | 0.0154 | 15    | 70         | 79       | IPVGPETLGR                                     |           |         |                      |      | Mascot      |
| 1262.6409  | 1262.657    | 0.0161 | 13    | 46         | 57       | TIAMDGTEGLVR                                   |           |         |                      |      | Mascot      |
| 1278.6359  | 1278.6542   | 0.0183 | 14    | 46         | 57       | TIAMDGTEGLVR                                   |           |         | Oxidation (M)[4]     |      | Mascot      |
| 1385.7094  | 1385.7295   | 0.0201 | 15    | 80         | 91       | IMNVGEPIDER                                    |           |         |                      |      | Mascot      |
| 1401.7042  | 1401.7147   | 0.0105 | 7     | 80         | 91       | IMNVGEPIDER                                    |           |         | Oxidation (M)[2]     |      | Mascot      |
| 1406.681   | 1406.702    | 0.021  | 15    | 162        | 175      | AHGGYSVFAGVGER                                 | 123       | 100     |                      |      | Mascot      |
| 1406.681   | 1406.702    | 0.021  | 15    | 162        | 175      | AHGGYSVFAGVGER                                 |           |         |                      |      | Mascot      |
| 1435.7539  | 1435.7772   | 0.0233 | 16    | 247        | 260      | FTQAGSEVSALLGR                                 |           |         |                      |      | Mascot      |
| 1435.7539  | 1435.7772   | 0.0233 | 16    | 247        | 260      | FTQAGSEVSALLGR                                 | 105       | 100     |                      |      | Mascot      |
| 1439.7893  | 1439.8098   | 0.0205 | 14    | 218        | 230      | VALTGLTVAEYFR                                  |           |         |                      |      | Mascot      |
| 1457.8396  | 1457.8481   | 0.0085 | 6     | 149        | 161      | TVLIMELINNAK                                   |           |         |                      |      | Mascot      |
| 1575.8159  | 1575.8386   | 0.0227 | 14    | 46         | 60       | TIAMDGTEGLVRGQK                                |           |         |                      |      | Mascot      |
| 1601.8104  | 1601.8376   | 0.0272 | 17    | 201        | 215      | VALVYQGMNEPPGAR                                |           |         |                      |      | Mascot      |
| 1601.8104  | 1601.8376   | 0.0272 | 17    | 201        | 215      | VALVYQGMNEPPGAR                                | 74        | 99.983  |                      |      | Mascot      |
| 1617.8053  | 1617.8232   | 0.0179 | 11    | 201        | 215      | VALVYQGMNEPPGAR                                |           |         | Oxidation (M)[8]     |      | Mascot      |
| 1650.9174  | 1650.9436   | 0.0262 | 16    | 31         | 45       | LVLVEAQHLEGSTVR                                |           |         |                      |      | Mascot      |
| 1650.9174  | 1650.9436   | 0.0262 | 16    | 31         | 45       | LVLVEAQHLEGSTVR                                | 108       | 100     |                      |      | Mascot      |
| 1780.9625  | 1780.9902   | 0.0277 | 16    | 80         | 95       | IMNVGEPIDERGPIK                                |           |         |                      |      | Mascot      |
| 1796.9574  | 1796.9805   | 0.0231 | 13    | 80         | 95       | IMNVGEPIDERGPIK                                |           |         | Oxidation (M)[2]     |      | Mascot      |
| 1815.8694  | 1815.8987   | 0.0293 | 16    | 343        | 358      | IMDPNIVGSEHYDVAR                               |           |         |                      |      | Mascot      |
| 1831.8643  | 1831.8866   | 0.0223 | 12    | 343        | 358      | IMDPNIVGSEHYDVAR                               |           |         | Oxidation (M)[2]     |      | Mascot      |
| 1921.9655  | 1921.9979   | 0.0324 | 17    | 231        | 246      | DOEGQDVLLFDINIFR                               |           |         |                      |      | Mascot      |
| 1988.0334  | 1988.0614   | 0.028  | 14    | 324        | 342      | AIAELGIYPAVDPLDSTSR                            | 89        | 100     |                      |      | Mascot      |
| 1988.0334  | 1988.0614   | 0.028  | 14    | 324        | 342      | AIAELGIYPAVDPLDSTSR                            |           |         |                      |      | Mascot      |
| 2005.0541  | 2005.0811   | 0.027  | 13    | 399        | 416      | FLSQPFQVAEVFTGHLG<br>K                         |           |         |                      |      | Mascot      |
| 2266.0842  | 2266.1208   | 0.0366 | 16    | 261        | 281      | IPSAVGYOPTLATDMGT<br>MQER                      |           |         |                      |      | Mascot      |
| 2282.0791  | 2282.1152   | 0.0361 | 16    | 261        | 281      | IPSAVGYOPTLATDMGT<br>MQER                      |           |         | Oxidation (M)[15]    |      | Mascot      |
| 2298.074   | 2298.1096   | 0.0356 | 15    | 261        | 281      | IPSAVGYOPTLATDMGT<br>MQER                      |           |         | Oxidation (M)[15,18] |      | Mascot      |
| 2298.074   | 2298.1096   |        |       |            |          |                                                |           |         |                      |      | Mascot      |
| 2318.1445  | 2318.1768   | 0.0323 | 14    | 176        | 195      | TREGNDLYHEMIESGVIN<br>LK                       |           |         |                      |      | Mascot      |
| 2334.1394  | 2334.175    | 0.0356 | 15    | 176        | 195      | TREGNDLYHEMIESGVIN<br>LK                       |           |         | Oxidation (M)[11]    |      | Mascot      |
| 2675.3809  | 2675.4189   | 0.038  | 14    | 369        | 392      | SLODIIALGMDELSEEDK<br>LTVSR                    |           |         |                      |      | Mascot      |
| 2691.3757  | 2691.4209   | 0.0452 | 17    | 369        | 392      | SLODIIALGMDELSEEDK<br>LTVSR                    |           |         | Oxidation (M)[11]    |      | Mascot      |
| 3842.981   | 3843.0251   | 0.0441 | 11    | 287        | 323      | KGSIITSVQAIYVPADDLT<br>DPAPATTFAHLDATTVLS<br>R |           |         |                      |      | Mascot      |

7 mitochondrial ATP synthase, H+ transporting F1 gjl89574023 44347.2 5.25 18 699 100 499 100

complex beta subunit [Lepus europaeus]

Peptide Information

| Calc. Mass | Obsrv. Mass | ± da   | ± ppm | Start Seq. | End Seq. | Sequence                                      | Ion Score | C. I. % | Modification         | Rank | Result | Type |
|------------|-------------|--------|-------|------------|----------|-----------------------------------------------|-----------|---------|----------------------|------|--------|------|
| 1038.5942  | 1038.6096   | 0.0154 | 15    | 42         | 51       | IPVGPETLGR                                    |           |         |                      |      | Mascot |      |
| 1262.6409  | 1262.657    | 0.0161 | 13    | 18         | 29       | TIAMDGTEGLVR                                  |           |         |                      |      | Mascot |      |
| 1278.6359  | 1278.6542   | 0.0183 | 14    | 26         | 37       | TIAMDGTEGLVR                                  |           |         | Oxidation (M)[4]     |      | Mascot |      |
| 1385.7094  | 1385.7295   | 0.0201 | 15    | 52         | 63       | IMNVGEPIDER                                   |           |         |                      |      | Mascot |      |
| 1401.7042  | 1401.7147   | 0.0105 | 7     | 52         | 63       | IMNVGEPIDER                                   |           |         | Oxidation (M)[2]     |      | Mascot |      |
| 1406.681   | 1406.702    | 0.021  | 15    | 134        | 147      | AHGGYSVFAGVGER                                | 123       | 100     |                      |      | Mascot |      |
| 1406.681   | 1406.702    | 0.021  | 15    | 134        | 147      | AHGGYSVFAGVGER                                |           |         |                      |      | Mascot |      |
| 1435.7539  | 1435.7772   | 0.0233 | 16    | 219        | 232      | FTQAGSEVSALLGR                                |           |         |                      |      | Mascot |      |
| 1435.7539  | 1435.7772   | 0.0233 | 16    | 219        | 232      | FTQAGSEVSALLGR                                | 105       | 100     |                      |      | Mascot |      |
| 1439.7893  | 1439.8098   | 0.0205 | 14    | 190        | 202      | VALTGLTVAEYFR                                 |           |         |                      |      | Mascot |      |
| 1457.8396  | 1457.8481   | 0.0085 | 6     | 121        | 133      | TVLIMELNNVAK                                  |           |         |                      |      | Mascot |      |
| 1575.8159  | 1575.8386   | 0.0227 | 14    | 18         | 32       | TIAMDGTEGLVRGQK                               |           |         |                      |      | Mascot |      |
| 1601.8104  | 1601.8376   | 0.0272 | 17    | 173        | 187      | VALVYGMNEPPGAR                                |           |         |                      |      | Mascot |      |
| 1601.8104  | 1601.8376   | 0.0272 | 17    | 173        | 187      | VALVYGMNEPPGAR                                | 74        | 99.983  |                      |      | Mascot |      |
| 1617.8053  | 1617.8232   | 0.0179 | 11    | 173        | 187      | VALVYGMNEPPGAR                                |           |         | Oxidation (M)[8]     |      | Mascot |      |
| 1650.9174  | 1650.9436   | 0.0262 | 16    | 3          | 17       | LVLEVAQHLGESTVR                               |           |         |                      |      | Mascot |      |
| 1650.9174  | 1650.9436   | 0.0262 | 16    | 3          | 17       | LVLEVAQHLGESTVR                               | 108       | 100     |                      |      | Mascot |      |
| 1780.9625  | 1780.9902   | 0.0277 | 16    | 52         | 67       | IMNVGEPIDERGPIK                               |           |         |                      |      | Mascot |      |
| 1796.9574  | 1796.9805   | 0.0231 | 13    | 52         | 67       | IMNVGEPIDERGPIK                               |           |         | Oxidation (M)[2]     |      | Mascot |      |
| 1815.8694  | 1815.8987   | 0.0293 | 16    | 315        | 330      | MDPNIVGSEHYDVAR                               |           |         |                      |      | Mascot |      |
| 1831.8643  | 1831.8866   | 0.0223 | 12    | 315        | 330      | MDPNIVGSEHYDVAR                               |           |         | Oxidation (M)[2]     |      | Mascot |      |
| 1921.9655  | 1921.9979   | 0.0324 | 17    | 203        | 218      | DQEGQDVLLFDNIFR                               |           |         |                      |      | Mascot |      |
| 1988.0334  | 1988.0614   | 0.028  | 14    | 296        | 314      | AIAELGIYPAVDPLDSTSR                           | 89        | 100     |                      |      | Mascot |      |
| 1988.0334  | 1988.0614   | 0.028  | 14    | 296        | 314      | AIAELGIYPAVDPLDSTSR                           |           |         |                      |      | Mascot |      |
| 2266.0842  | 2266.1208   | 0.0366 | 16    | 233        | 253      | IPSAVGYOPTLATDMGT<br>MQER                     |           |         |                      |      | Mascot |      |
| 2282.0791  | 2282.1152   | 0.0361 | 16    | 233        | 253      | IPSAVGYOPTLATDMGT<br>MQER                     |           |         | Oxidation (M)[15]    |      | Mascot |      |
| 2298.074   | 2298.1096   | 0.0356 | 15    | 233        | 253      | IPSAVGYOPTLATDMGT<br>MQER                     |           |         | Oxidation (M)[15,18] |      | Mascot |      |
| 2318.1445  | 2318.1768   | 0.0323 | 14    | 148        | 167      | TREGNDLYHIESGVIN<br>LK                        |           |         |                      |      | Mascot |      |
| 2334.1394  | 2334.175    | 0.0356 | 15    | 148        | 167      | TREGNDLYHIESGVIN<br>LK                        |           |         | Oxidation (M)[11]    |      | Mascot |      |
| 2675.3809  | 2675.4189   | 0.038  | 14    | 341        | 364      | SLQDIIALGMDELSEEDK<br>LTVSR                   |           |         |                      |      | Mascot |      |
| 2691.3757  | 2691.4209   | 0.0452 | 17    | 341        | 364      | SLQDIIALGMDELSEEDK<br>LTVSR                   |           |         | Oxidation (M)[11]    |      | Mascot |      |
| 3842.981   | 3843.0251   | 0.0441 | 11    | 259        | 295      | KGSITSVQAIYVPADDLT<br>DPAPATTFAHLDATTVLS<br>R |           |         |                      |      | Mascot |      |

8 mitochondrial ATP synthase, H+ transporting F1 complex beta subunit [Oryctolagus cuniculus]

Peptide Information

| Calc. Mass | Obsrv. Mass | ± da   | ± ppm | Start Seq. | End Seq. | Sequence                                      | Ion Score | C. I. % | Modification         | Rank | Result | Type |
|------------|-------------|--------|-------|------------|----------|-----------------------------------------------|-----------|---------|----------------------|------|--------|------|
| 1038.5942  | 1038.6096   | 0.0154 | 15    | 50         | 59       | IPVGPETLGR                                    |           |         |                      |      | Mascot |      |
| 1262.6409  | 1262.657    | 0.0161 | 13    | 26         | 37       | TIAMDGTEGLVR                                  |           |         |                      |      | Mascot |      |
| 1278.6359  | 1278.6542   | 0.0183 | 14    | 26         | 37       | TIAMDGTEGLVR                                  |           |         | Oxidation (M)[4]     |      | Mascot |      |
| 1385.7094  | 1385.7295   | 0.0201 | 15    | 60         | 71       | IMNVGEPIDER                                   |           |         |                      |      | Mascot |      |
| 1401.7042  | 1401.7147   | 0.0105 | 7     | 60         | 71       | IMNVGEPIDER                                   |           |         | Oxidation (M)[2]     |      | Mascot |      |
| 1406.681   | 1406.702    | 0.021  | 15    | 142        | 155      | AHGGYSVFAGVGER                                | 123       | 100     |                      |      | Mascot |      |
| 1406.681   | 1406.702    | 0.021  | 15    | 142        | 155      | AHGGYSVFAGVGER                                |           |         |                      |      | Mascot |      |
| 1435.7539  | 1435.7772   | 0.0233 | 16    | 227        | 240      | FTQAGSEVSALLGR                                |           |         |                      |      | Mascot |      |
| 1435.7539  | 1435.7772   | 0.0233 | 16    | 227        | 240      | FTQAGSEVSALLGR                                | 105       | 100     |                      |      | Mascot |      |
| 1439.7893  | 1439.8098   | 0.0205 | 14    | 198        | 210      | VALTGLTVAEYFR                                 |           |         |                      |      | Mascot |      |
| 1457.8396  | 1457.8481   | 0.0085 | 6     | 129        | 141      | TVLIMELNNVAK                                  |           |         |                      |      | Mascot |      |
| 1575.8159  | 1575.8386   | 0.0227 | 14    | 26         | 40       | TIAMDGTEGLVRGQK                               |           |         |                      |      | Mascot |      |
| 1601.8104  | 1601.8376   | 0.0272 | 17    | 181        | 195      | VALVYGMNEPPGAR                                |           |         |                      |      | Mascot |      |
| 1601.8104  | 1601.8376   | 0.0272 | 17    | 181        | 195      | VALVYGMNEPPGAR                                | 74        | 99.983  |                      |      | Mascot |      |
| 1617.8053  | 1617.8232   | 0.0179 | 11    | 181        | 195      | VALVYGMNEPPGAR                                |           |         | Oxidation (M)[8]     |      | Mascot |      |
| 1650.9174  | 1650.9436   | 0.0262 | 16    | 11         | 25       | LVLEVAQHLGESTVR                               |           |         |                      |      | Mascot |      |
| 1650.9174  | 1650.9436   | 0.0262 | 16    | 11         | 25       | LVLEVAQHLGESTVR                               | 108       | 100     |                      |      | Mascot |      |
| 1780.9625  | 1780.9902   | 0.0277 | 16    | 60         | 75       | IMNVGEPIDERGPIK                               |           |         |                      |      | Mascot |      |
| 1796.9574  | 1796.9805   | 0.0231 | 13    | 60         | 75       | IMNVGEPIDERGPIK                               |           |         | Oxidation (M)[2]     |      | Mascot |      |
| 1815.8694  | 1815.8987   | 0.0293 | 16    | 323        | 338      | MDPNIVGSEHYDVAR                               |           |         |                      |      | Mascot |      |
| 1831.8643  | 1831.8866   | 0.0223 | 12    | 323        | 338      | MDPNIVGSEHYDVAR                               |           |         | Oxidation (M)[2]     |      | Mascot |      |
| 1921.9655  | 1921.9979   | 0.0324 | 17    | 211        | 226      | DQEGQDVLLFDNIFR                               |           |         |                      |      | Mascot |      |
| 1988.0334  | 1988.0614   | 0.028  | 14    | 304        | 322      | AIAELGIYPAVDPLDSTSR                           | 89        | 100     |                      |      | Mascot |      |
| 1988.0334  | 1988.0614   | 0.028  | 14    | 304        | 322      | AIAELGIYPAVDPLDSTSR                           |           |         |                      |      | Mascot |      |
| 2266.0842  | 2266.1208   | 0.0366 | 16    | 241        | 261      | IPSAVGYOPTLATDMGT<br>MQER                     |           |         |                      |      | Mascot |      |
| 2282.0791  | 2282.1152   | 0.0361 | 16    | 241        | 261      | IPSAVGYOPTLATDMGT<br>MQER                     |           |         | Oxidation (M)[15]    |      | Mascot |      |
| 2298.074   | 2298.1096   | 0.0356 | 15    | 241        | 261      | IPSAVGYOPTLATDMGT<br>MQER                     |           |         | Oxidation (M)[15,18] |      | Mascot |      |
| 2318.1445  | 2318.1768   | 0.0323 | 14    | 156        | 175      | TREGNDLYHIESGVIN<br>LK                        |           |         |                      |      | Mascot |      |
| 2334.1394  | 2334.175    | 0.0356 | 15    | 156        | 175      | TREGNDLYHIESGVIN<br>LK                        |           |         | Oxidation (M)[11]    |      | Mascot |      |
| 2675.3809  | 2675.4189   | 0.038  | 14    | 349        | 372      | SLQDIIALGMDELSEEDK<br>LTVSR                   |           |         |                      |      | Mascot |      |
| 2691.3757  | 2691.4209   | 0.0452 | 17    | 349        | 372      | SLQDIIALGMDELSEEDK<br>LTVSR                   |           |         | Oxidation (M)[11]    |      | Mascot |      |
| 3842.981   | 3843.0251   | 0.0441 | 11    | 267        | 303      | KGSITSVQAIYVPADDLT<br>DPAPATTFAHLDATTVLS<br>R |           |         |                      |      | Mascot |      |

9 PREDICTED: ATP synthase subunit beta, mitochondrial [Sus scrofa]

Peptide Information

| Calc. Mass | Obsrv. Mass | ± da   | ± ppm | Start Seq. | End Seq. | Sequence              | Ion Score | C. I. % | Modification     | Rank | Result | Type |
|------------|-------------|--------|-------|------------|----------|-----------------------|-----------|---------|------------------|------|--------|------|
| 1038.5942  | 1038.6096   | 0.0154 | 15    | 134        | 143      | IPVGPETLGR            |           |         |                  |      | Mascot |      |
| 1262.6409  | 1262.657    | 0.0161 | 13    | 110        | 121      | TIAMDGTEGLVR          |           |         |                  |      | Mascot |      |
| 1278.6359  | 1278.6542   | 0.0183 | 14    | 110        | 121      | TIAMDGTEGLVR          |           |         | Oxidation (M)[4] |      | Mascot |      |
| 1385.7094  | 1385.7295   | 0.0201 | 15    | 144        | 155      | IMNVGEPIDER           |           |         |                  |      | Mascot |      |
| 1401.7042  | 1401.7147   | 0.0105 | 7     | 144        | 155      | IMNVGEPIDER           |           |         | Oxidation (M)[2] |      | Mascot |      |
| 1406.681   | 1406.702    | 0.021  | 15    | 226        | 239      | AHGGYSVFAGVGER        | 123       | 100     |                  |      | Mascot |      |
| 1406.681   | 1406.702    | 0.021  | 15    | 226        | 239      | AHGGYSVFAGVGER        |           |         |                  |      | Mascot |      |
| 1435.7539  | 1435.7772   | 0.0233 | 16    | 311        | 324      | FTQAGSEVSALLGR        |           |         |                  |      | Mascot |      |
| 1435.7539  | 1435.7772   | 0.0233 | 16    | 311        | 324      | FTQAGSEVSALLGR        | 105       | 100     |                  |      | Mascot |      |
| 1439.7893  | 1439.8098   | 0.0205 | 14    | 282        | 294      | VALTGLTVAEYFR         |           |         |                  |      | Mascot |      |
| 1457.8396  | 1457.8481   | 0.0085 | 6     | 213        | 225      | TVLIMELNNVAK          |           |         |                  |      | Mascot |      |
| 1575.8159  | 1575.8386   | 0.0227 | 14    | 110        | 124      | TIAMDGTEGLVRGQK       |           |         |                  |      | Mascot |      |
| 1601.8104  | 1601.8376   | 0.0272 | 17    | 265        | 279      | VALVYGMNEPPGAR        |           |         |                  |      | Mascot |      |
| 1601.8104  | 1601.8376   | 0.0272 | 17    | 265        | 279      | VALVYGMNEPPGAR        | 74        | 99.983  |                  |      | Mascot |      |
| 1617.8053  | 1617.8232   | 0.0179 | 11    | 265        | 279      | VALVYGMNEPPGAR        |           |         | Oxidation (M)[8] |      | Mascot |      |
| 1650.9174  | 1650.9436   | 0.0262 | 16    | 95         | 109      | LVLEVAQHLGESTVR       |           |         |                  |      | Mascot |      |
| 1650.9174  | 1650.9436   | 0.0262 | 16    | 95         | 109      | LVLEVAQHLGESTVR       | 108       | 100     |                  |      | Mascot |      |
| 1780.9625  | 1780.9902   | 0.0277 | 16    | 144        | 159      | IMNVGEPIDERGPIK       |           |         |                  |      | Mascot |      |
| 1796.9574  | 1796.9805   | 0.0231 | 13    | 144        | 159      | IMNVGEPIDERGPIK       |           |         | Oxidation (M)[2] |      | Mascot |      |
| 1815.8694  | 1815.8987   | 0.0293 | 16    | 407        | 422      | MDPNIVGSEHYDVAR       |           |         |                  |      | Mascot |      |
| 1831.8643  | 1831.8866   | 0.0223 | 12    | 407        | 422      | MDPNIVGSEHYDVAR       |           |         | Oxidation (M)[2] |      | Mascot |      |
| 1921.9655  | 1921.9979   | 0.0324 | 17    | 295        | 310      | DQEGQDVLLFDNIFR       |           |         |                  |      | Mascot |      |
| 1988.0334  | 1988.0614   | 0.028  | 14    | 388        | 406      | AIAELGIYPAVDPLDSTSR   | 89        | 100     |                  |      | Mascot |      |
| 1988.0334  | 1988.0614   | 0.028  | 14    | 388        | 406      | AIAELGIYPAVDPLDSTSR   |           |         |                  |      | Mascot |      |
| 2005.0541  | 2005.0811   | 0.027  | 13    | 463        | 480      | FLSQPFQVAEVTGHLG<br>K |           |         |                  |      | Mascot |      |

| Peptide Information |             |        |       |            |          | Ion Score                   | C. I. % | Modification         | Rank | Result Type |
|---------------------|-------------|--------|-------|------------|----------|-----------------------------|---------|----------------------|------|-------------|
| Calc. Mass          | Obsrv. Mass | ± da   | ± ppm | Start Seq. | End Seq. |                             |         |                      |      |             |
| 1038.5942           | 1038.6096   | 0.0154 | 15    | 70         | 79       | IPVGPETLGR                  |         |                      |      | Mascot      |
| 1262.6409           | 1262.657    | 0.0161 | 13    | 46         | 57       | TIAMDGTGLVLR                |         |                      |      | Mascot      |
| 1278.6359           | 1278.6542   | 0.0183 | 14    | 46         | 57       | TIAMDGTGLVLR                |         | Oxidation (M)[4]     |      | Mascot      |
| 1385.7094           | 1385.7295   | 0.0201 | 15    | 80         | 91       | IMNVIGPDER                  |         |                      |      | Mascot      |
| 1401.7042           | 1401.7147   | 0.0105 | 7     | 80         | 91       | IMNVIGPDER                  |         | Oxidation (M)[2]     |      | Mascot      |
| 1406.681            | 1406.702    | 0.021  | 15    | 162        | 175      | AHGGYSFVAGVGR               | 123     | 100                  |      | Mascot      |
| 1406.681            | 1406.702    | 0.021  | 15    | 162        | 175      | AHGGYSFVAGVGR               |         |                      |      | Mascot      |
| 1435.7539           | 1435.7772   | 0.0233 | 16    | 247        | 260      | FTQAGSEVSALLGR              |         |                      |      | Mascot      |
| 1435.7539           | 1435.7772   | 0.0233 | 16    | 247        | 260      | FTQAGSEVSALLGR              | 105     | 100                  |      | Mascot      |
| 1439.7893           | 1439.8098   | 0.0205 | 14    | 218        | 230      | VALTGLTVAEYFR               |         |                      |      | Mascot      |
| 1457.8396           | 1457.8481   | 0.0085 | 6     | 149        | 161      | TVLMELINNVAK                |         |                      |      | Mascot      |
| 1575.8159           | 1575.8386   | 0.0227 | 14    | 46         | 60       | TIAMDGTGLVLRGQK             |         |                      |      | Mascot      |
| 1601.8104           | 1601.8376   | 0.0272 | 17    | 201        | 215      | VALVYGMNEPPGAR              |         |                      |      | Mascot      |
| 1601.8104           | 1601.8376   | 0.0272 | 17    | 201        | 215      | VALVYGMNEPPGAR              | 74      | 99.983               |      | Mascot      |
|                     | 1601.8376   |        |       |            |          |                             |         |                      |      | Mascot      |
| 1617.8053           | 1617.8232   | 0.0179 | 11    | 201        | 215      | VALVYGMNEPPGAR              |         | Oxidation (M)[8]     |      | Mascot      |
| 1650.9174           | 1650.9436   | 0.0262 | 16    | 31         | 45       | LVLEVAQHLGESTVR             |         |                      |      | Mascot      |
| 1650.9174           | 1650.9436   | 0.0262 | 16    | 31         | 45       | LVLEVAQHLGESTVR             | 108     | 100                  |      | Mascot      |
| 1780.9625           | 1780.9902   | 0.0277 | 16    | 80         | 95       | IMNVIGPDERGPIK              |         |                      |      | Mascot      |
| 1796.9574           | 1796.9805   | 0.0231 | 13    | 80         | 95       | IMNVIGPDERGPIK              |         | Oxidation (M)[2]     |      | Mascot      |
| 1815.8694           | 1815.8987   | 0.0293 | 16    | 343        | 358      | IMDPNVGSEHYDVAR             |         |                      |      | Mascot      |
| 1831.8643           | 1831.8866   | 0.0223 | 12    | 343        | 358      | IMDPNVGSEHYDVAR             |         | Oxidation (M)[2]     |      | Mascot      |
| 1921.9655           | 1921.9979   | 0.0334 | 17    | 231        | 246      | DOEGDVLFDIWFIR              |         |                      |      | Mascot      |
| 1988.0334           | 1988.0614   | 0.028  | 14    | 324        | 342      | AIAGELGIYPAVDPLDSTSR        | 89      | 100                  |      | Mascot      |
| 1988.0334           | 1988.0614   | 0.028  | 14    | 324        | 342      | AIAGELGIYPAVDPLDSTSR        |         |                      |      | Mascot      |
| 2266.0842           | 2266.1208   | 0.0366 | 16    | 261        | 281      | IPSAVGYOPTLATDMGT<br>MQER   |         |                      |      | Mascot      |
| 2282.0791           | 2282.1152   | 0.0361 | 16    | 261        | 281      | IPSAVGYOPTLATDMGT<br>MQER   |         | Oxidation (M)[15]    |      | Mascot      |
| 2298.074            | 2298.1096   | 0.0356 | 15    | 261        | 281      | IPSAVGYOPTLATDMGT<br>MQER   |         | Oxidation (M)[15,18] |      | Mascot      |
| 2318.1445           | 2318.1768   | 0.0323 | 14    | 176        | 195      | TREGNDLYHEMIESGVIN<br>LK    |         |                      |      | Mascot      |
| 2334.1394           | 2334.175    | 0.0356 | 15    | 176        | 195      | TREGNDLYHEMIESGVIN<br>LK    |         | Oxidation (M)[11]    |      | Mascot      |
| 2675.3809           | 2675.4189   | 0.038  | 14    | 369        | 392      | SLQDIIALGMDELSEEDK<br>LTVSR |         |                      |      | Mascot      |
| 2691.3757           | 2691.4209   | 0.0452 | 17    | 369        | 392      | SLQDIIALGMDELSEEDK<br>LTVSR |         | Oxidation (M)[11]    |      | Mascot      |
| 3842.981            | 3843.0251   | 0.0441 | 11    | 287        | 323      | KGSIITSQVAYVPADLT           |         |                      |      | Mascot      |

|   |                                               |              |         |      |    |     |     |     |     |
|---|-----------------------------------------------|--------------|---------|------|----|-----|-----|-----|-----|
| 1 | PREDICTED: CG1837-like isoform 1 [Bos taurus] | gi 119915902 | 45780.7 | 5.43 | 12 | 782 | 100 | 657 | 100 |
|---|-----------------------------------------------|--------------|---------|------|----|-----|-----|-----|-----|

|                     |                                         |             |  |        |  |       |  |            |  |          |             |                       |  |           |  |         |  |                           |  |     |  |      |  |        |  |        |  |
|---------------------|-----------------------------------------|-------------|--|--------|--|-------|--|------------|--|----------|-------------|-----------------------|--|-----------|--|---------|--|---------------------------|--|-----|--|------|--|--------|--|--------|--|
| 2                   | PREDICTED: hCG2043289-like [Bos taurus] |             |  |        |  |       |  |            |  |          | g 297489527 |                       |  | 34975.5   |  | 6.03    |  | 11                        |  | 607 |  | 100  |  | 487    |  | 100    |  |
| Peptide Information |                                         |             |  |        |  |       |  |            |  |          |             |                       |  |           |  |         |  |                           |  |     |  |      |  |        |  |        |  |
| Calc. Mass          |                                         | Obsrv. Mass |  | ± da   |  | ± ppm |  | Start Seq. |  | End Seq. |             | Sequence              |  | Ion Score |  | C. I. % |  | Modification              |  |     |  | Rank |  | Result |  | Type   |  |
| 1079.6143           |                                         | 1079.6656   |  | 0.0513 |  | 48    |  | 1          |  | 9        |             | MKKPSHVR              |  |           |  |         |  |                           |  |     |  |      |  |        |  | Mascot |  |
| 1079.6143           |                                         | 1079.6656   |  | 0.0513 |  | 48    |  | 1          |  | 9        |             | MKKPSHVR              |  |           |  |         |  |                           |  |     |  |      |  |        |  | Mascot |  |
| 1150.6255           |                                         | 1150.6649   |  | 0.0394 |  | 34    |  | 61         |  | 70       |             | FFKPGQAEVK            |  |           |  |         |  |                           |  |     |  |      |  |        |  | Mascot |  |
| 1152.62             |                                         | 1152.6676   |  | 0.0476 |  | 41    |  | 181        |  | 189      |             | GYPTLLWFR             |  | 51        |  | 94.757  |  |                           |  |     |  |      |  |        |  | Mascot |  |
| 1152.62             |                                         | 1152.6676   |  | 0.0476 |  | 41    |  | 181        |  | 189      |             | GYPTLLWFR             |  |           |  |         |  |                           |  |     |  |      |  |        |  | Mascot |  |
| 1309.5604           |                                         | 1309.609    |  | 0.0486 |  | 37    |  | 132        |  | 141      |             | FPFVWGCHCK            |  |           |  |         |  | Carbamidomethyl (C)[6.9]  |  |     |  |      |  |        |  | Mascot |  |
| 1325.5554           |                                         | 1325.6071   |  | 0.0517 |  | 39    |  | 265        |  | 274      |             | FYAPWGCHCK            |  | 63        |  | 99.652  |  | Carbamidomethyl (C)[6.9]  |  |     |  |      |  |        |  | Mascot |  |
| 1325.5554           |                                         | 1325.6071   |  | 0.0517 |  | 39    |  | 265        |  | 274      |             | FYAPWGCHCK            |  |           |  |         |  | Carbamidomethyl (C)[6.9]  |  |     |  |      |  |        |  | Mascot |  |
| 1965.8541           |                                         | 1965.9304   |  | 0.0763 |  | 39    |  | 165        |  | 180      |             | VDCTOHYELCSNQVR       |  |           |  |         |  | Carbamidomethyl (C)[3.10] |  |     |  |      |  |        |  | Mascot |  |
| 1965.8541           |                                         | 1965.9304   |  | 0.0763 |  | 39    |  | 165        |  | 180      |             | VDCTOHYELCSNQVR       |  | 105       |  | 100     |  | Carbamidomethyl (C)[3.10] |  |     |  |      |  |        |  | Mascot |  |
| 2107.0012           |                                         | 2107.0828   |  | 0.0816 |  | 39    |  | 287        |  | 305      |             | EFPGLAEVTIAVDCTAE R   |  |           |  |         |  | Carbamidomethyl (C)[15]   |  |     |  |      |  |        |  | Mascot |  |
| 2107.0012           |                                         | 2107.0828   |  | 0.0816 |  | 39    |  | 287        |  | 305      |             | EFPGLAEVTIAVDCTAE R   |  | 168       |  | 100     |  | Carbamidomethyl (C)[15]   |  |     |  |      |  |        |  | Mascot |  |
| 2193.155            |                                         | 2193.2393   |  | 0.0843 |  | 38    |  | 142        |  | 161      |             | ALAPTWELQALGLEHSET VK |  |           |  |         |  |                           |  |     |  |      |  |        |  | Mascot |  |
| 2193.155            |                                         | 2193.2393   |  | 0.0843 |  | 38    |  | 142        |  | 161      |             | ALAPTWELQALGLEHSET    |  | 99        |  | 100     |  |                           |  |     |  |      |  |        |  | Mascot |  |

|           |           |        |    |     |     |                                |                           |        |
|-----------|-----------|--------|----|-----|-----|--------------------------------|---------------------------|--------|
| 2235.0962 | 2235.1819 | 0.0857 | 38 | 286 | 305 | VK<br>KEFPGLAETVIAEVDCTA<br>ER | Carbamidomethyl (C)[16]   | Mascot |
| 2264.0547 | 2264.1379 | 0.0832 | 37 | 162 | 180 | IGKVDCTQHYELCSGNQ<br>VR        | Carbamidomethyl (C)[6,13] | Mascot |
| 2573.2783 | 2573.3726 | 0.0943 | 37 | 109 | 131 | QGLYLSAGNFELHVAQ<br>GDHFK      |                           | Mascot |

3 PREDICTED: similar to Thioredoxin domain-containing protein 5 precursor (Thioredoxin-like protein p

| Peptide Information |             |        |       |            |          |                          |           |         |                           | Rank | Result Type |
|---------------------|-------------|--------|-------|------------|----------|--------------------------|-----------|---------|---------------------------|------|-------------|
| Calc. Mass          | Obsrv. Mass | ± da   | ± ppm | Start Seq. | End Seq. | Sequence                 | Ion Score | C. I. % | Modification              |      |             |
| 1079.6248           | 1079.6656   | 0.0408 | 38    | 312        | 320      | GYPTLLLF                 |           |         |                           |      | Mascot      |
| 1079.6248           | 1079.6656   | 0.0408 | 38    | 312        | 320      | GYPTLLLF                 | 54        | 97.384  |                           |      | Mascot      |
| 1150.6255           | 1150.6649   | 0.0394 | 34    | 58         | 67       | FFKPQGEAVK               |           |         |                           |      | Mascot      |
| 1152.62             | 1152.6676   | 0.0476 | 41    | 178        | 186      | GYPTLLWFR                | 51        | 94.757  |                           |      | Mascot      |
| 1152.62             | 1152.6676   | 0.0476 | 41    | 178        | 186      | GYPTLLWFR                |           |         |                           |      | Mascot      |
| 1309.5604           | 1309.609    | 0.0486 | 37    | 129        | 138      | FFAPWCGHCK               |           |         | Carbamidomethyl (C)[6,9]  |      | Mascot      |
| 1325.5554           | 1325.6071   | 0.0517 | 39    | 262        | 271      | FYAPWCGHCK               | 63        | 99.652  | Carbamidomethyl (C)[6,9]  |      | Mascot      |
| 1325.5554           | 1325.6071   | 0.0517 | 39    | 262        | 271      | FYAPWCGHCK               |           |         | Carbamidomethyl (C)[6,9]  |      | Mascot      |
| 1965.8541           | 1965.9304   | 0.0763 | 39    | 162        | 177      | VDCTQHYELCSGNQVR         |           |         | Carbamidomethyl (C)[3,10] |      | Mascot      |
| 1965.8541           | 1965.9304   | 0.0763 | 39    | 162        | 177      | VDCTQHYELCSGNQVR         | 105       | 100     | Carbamidomethyl (C)[3,10] |      | Mascot      |
| 2193.155            | 2193.2393   | 0.0843 | 38    | 139        | 158      | ALAPTWEQLALGLEHSET<br>VK |           |         |                           |      | Mascot      |
| 2193.155            | 2193.2393   | 0.0843 | 38    | 139        | 158      | ALAPTWEQLALGLEHSET<br>VK | 99        | 100     |                           |      | Mascot      |
| 2264.0547           | 2264.1379   | 0.0832 | 37    | 159        | 177      | IGKVDCTQHYELCSGNQ<br>VR  |           |         | Carbamidomethyl (C)[6,13] |      | Mascot      |

4 hypothetical protein [Homo sapiens]

| Peptide Information |             |        |       |            |          |                          |           |         |                           | Rank | Result Type |
|---------------------|-------------|--------|-------|------------|----------|--------------------------|-----------|---------|---------------------------|------|-------------|
| Calc. Mass          | Obsrv. Mass | ± da   | ± ppm | Start Seq. | End Seq. | Sequence                 | Ion Score | C. I. % | Modification              |      |             |
| 1079.6248           | 1079.6656   | 0.0408 | 38    | 207        | 215      | GYPTLLLF                 |           |         |                           |      | Mascot      |
| 1079.6248           | 1079.6656   | 0.0408 | 38    | 207        | 215      | GYPTLLLF                 | 54        | 97.384  |                           |      | Mascot      |
| 1152.62             | 1152.6676   | 0.0476 | 41    | 73         | 81       | GYPTLLWFR                | 51        | 94.757  |                           |      | Mascot      |
| 1152.62             | 1152.6676   | 0.0476 | 41    | 73         | 81       | GYPTLLWFR                |           |         |                           |      | Mascot      |
| 1309.5604           | 1309.609    | 0.0486 | 37    | 24         | 33       | FFAPWCGHCK               |           |         | Carbamidomethyl (C)[6,9]  |      | Mascot      |
| 1325.5554           | 1325.6071   | 0.0517 | 39    | 157        | 166      | FYAPWCGHCK               | 63        | 99.652  | Carbamidomethyl (C)[6,9]  |      | Mascot      |
| 1325.5554           | 1325.6071   | 0.0517 | 39    | 157        | 166      | FYAPWCGHCK               |           |         | Carbamidomethyl (C)[6,9]  |      | Mascot      |
| 1965.8541           | 1965.9304   | 0.0763 | 39    | 57         | 72       | VDCTQHYELCSGNQVR         |           |         | Carbamidomethyl (C)[3,10] |      | Mascot      |
| 1965.8541           | 1965.9304   | 0.0763 | 39    | 57         | 72       | VDCTQHYELCSGNQVR         | 105       | 100     | Carbamidomethyl (C)[3,10] |      | Mascot      |
| 2193.155            | 2193.2393   | 0.0843 | 38    | 34         | 53       | ALAPTWEQLALGLEHSET<br>VK |           |         |                           |      | Mascot      |
| 2193.155            | 2193.2393   | 0.0843 | 38    | 34         | 53       | ALAPTWEQLALGLEHSET<br>VK | 99        | 100     |                           |      | Mascot      |
| 2264.0547           | 2264.1379   | 0.0832 | 37    | 54         | 72       | IGKVDCTQHYELCSGNQ<br>VR  |           |         | Carbamidomethyl (C)[6,13] |      | Mascot      |

5 PREDICTED: thioredoxin domain-containing protein 5-like [Calithrix jacchus]

| Peptide Information |             |        |       |            |          |                          |           |         |                           | Rank | Result Type |
|---------------------|-------------|--------|-------|------------|----------|--------------------------|-----------|---------|---------------------------|------|-------------|
| Calc. Mass          | Obsrv. Mass | ± da   | ± ppm | Start Seq. | End Seq. | Sequence                 | Ion Score | C. I. % | Modification              |      |             |
| 1079.6248           | 1079.6656   | 0.0408 | 38    | 394        | 402      | GYPTLLLF                 |           |         |                           |      | Mascot      |
| 1079.6248           | 1079.6656   | 0.0408 | 38    | 394        | 402      | GYPTLLLF                 | 54        | 97.384  |                           |      | Mascot      |
| 1150.6255           | 1150.6649   | 0.0394 | 34    | 140        | 149      | FFKPQGEAVK               |           |         |                           |      | Mascot      |
| 1152.62             | 1152.6676   | 0.0476 | 41    | 260        | 268      | GYPTLLWFR                | 51        | 94.757  |                           |      | Mascot      |
| 1152.62             | 1152.6676   | 0.0476 | 41    | 260        | 268      | GYPTLLWFR                |           |         |                           |      | Mascot      |
| 1309.5604           | 1309.609    | 0.0486 | 37    | 211        | 220      | FFAPWCGHCK               |           |         | Carbamidomethyl (C)[6,9]  |      | Mascot      |
| 1325.5554           | 1325.6071   | 0.0517 | 39    | 344        | 353      | FYAPWCGHCK               | 63        | 99.652  | Carbamidomethyl (C)[6,9]  |      | Mascot      |
| 1325.5554           | 1325.6071   | 0.0517 | 39    | 344        | 353      | FYAPWCGHCK               |           |         | Carbamidomethyl (C)[6,9]  |      | Mascot      |
| 1965.8541           | 1965.9304   | 0.0763 | 39    | 244        | 259      | VDCTQHYELCSGNQVR         |           |         | Carbamidomethyl (C)[3,10] |      | Mascot      |
| 1965.8541           | 1965.9304   | 0.0763 | 39    | 244        | 259      | VDCTQHYELCSGNQVR         | 105       | 100     | Carbamidomethyl (C)[3,10] |      | Mascot      |
| 2193.155            | 2193.2393   | 0.0843 | 38    | 221        | 240      | ALAPTWEQLALGLEHSET<br>VK |           |         |                           |      | Mascot      |
| 2193.155            | 2193.2393   | 0.0843 | 38    | 221        | 240      | ALAPTWEQLALGLEHSET<br>VK | 99        | 100     |                           |      | Mascot      |
| 2264.0547           | 2264.1379   | 0.0832 | 37    | 241        | 259      | IGKVDCTQHYELCSGNQ<br>VR  |           |         | Carbamidomethyl (C)[6,13] |      | Mascot      |

6 PREDICTED: similar to TXNDC5 protein isoform 1 [Pan troglodytes]

| Peptide Information |             |        |       |            |          |                          |           |         |                           | Rank | Result Type |
|---------------------|-------------|--------|-------|------------|----------|--------------------------|-----------|---------|---------------------------|------|-------------|
| Calc. Mass          | Obsrv. Mass | ± da   | ± ppm | Start Seq. | End Seq. | Sequence                 | Ion Score | C. I. % | Modification              |      |             |
| 1079.6248           | 1079.6656   | 0.0408 | 38    | 261        | 269      | GYPTLLLF                 |           |         |                           |      | Mascot      |
| 1079.6248           | 1079.6656   | 0.0408 | 38    | 261        | 269      | GYPTLLLF                 | 54        | 97.384  |                           |      | Mascot      |
| 1152.62             | 1152.6676   | 0.0476 | 41    | 145        | 153      | GYPTLLWFR                | 51        | 94.757  |                           |      | Mascot      |
| 1152.62             | 1152.6676   | 0.0476 | 41    | 145        | 153      | GYPTLLWFR                |           |         |                           |      | Mascot      |
| 1309.5604           | 1309.609    | 0.0486 | 37    | 96         | 105      | FFAPWCGHCK               |           |         | Carbamidomethyl (C)[6,9]  |      | Mascot      |
| 1325.5554           | 1325.6071   | 0.0517 | 39    | 211        | 220      | FYAPWCGHCK               | 63        | 99.652  | Carbamidomethyl (C)[6,9]  |      | Mascot      |
| 1325.5554           | 1325.6071   | 0.0517 | 39    | 211        | 220      | FYAPWCGHCK               |           |         | Carbamidomethyl (C)[6,9]  |      | Mascot      |
| 1965.8541           | 1965.9304   | 0.0763 | 39    | 129        | 144      | VDCTQHYELCSGNQVR         |           |         | Carbamidomethyl (C)[3,10] |      | Mascot      |
| 1965.8541           | 1965.9304   | 0.0763 | 39    | 129        | 144      | VDCTQHYELCSGNQVR         | 105       | 100     | Carbamidomethyl (C)[3,10] |      | Mascot      |
| 2193.155            | 2193.2393   | 0.0843 | 38    | 106        | 125      | ALAPTWEQLALGLEHSET<br>VK |           |         |                           |      | Mascot      |
| 2193.155            | 2193.2393   | 0.0843 | 38    | 106        | 125      | ALAPTWEQLALGLEHSET<br>VK | 99        | 100     |                           |      | Mascot      |
| 2264.0547           | 2264.1379   | 0.0832 | 37    | 126        | 144      | IGKVDCTQHYELCSGNQ<br>VR  |           |         | Carbamidomethyl (C)[6,13] |      | Mascot      |

7 PREDICTED: similar to TXNDC5 protein isoform 4 [Pan troglodytes]

| Peptide Information |             |        |       |            |          |                          |           |         |                           | Rank | Result Type |
|---------------------|-------------|--------|-------|------------|----------|--------------------------|-----------|---------|---------------------------|------|-------------|
| Calc. Mass          | Obsrv. Mass | ± da   | ± ppm | Start Seq. | End Seq. | Sequence                 | Ion Score | C. I. % | Modification              |      |             |
| 1079.6248           | 1079.6656   | 0.0408 | 38    | 279        | 287      | GYPTLLLF                 |           |         |                           |      | Mascot      |
| 1079.6248           | 1079.6656   | 0.0408 | 38    | 279        | 287      | GYPTLLLF                 | 54        | 97.384  |                           |      | Mascot      |
| 1152.62             | 1152.6676   | 0.0476 | 41    | 145        | 153      | GYPTLLWFR                | 51        | 94.757  |                           |      | Mascot      |
| 1152.62             | 1152.6676   | 0.0476 | 41    | 145        | 153      | GYPTLLWFR                |           |         |                           |      | Mascot      |
| 1309.5604           | 1309.609    | 0.0486 | 37    | 96         | 105      | FFAPWCGHCK               |           |         | Carbamidomethyl (C)[6,9]  |      | Mascot      |
| 1325.5554           | 1325.6071   | 0.0517 | 39    | 229        | 238      | FYAPWCGHCK               | 63        | 99.652  | Carbamidomethyl (C)[6,9]  |      | Mascot      |
| 1325.5554           | 1325.6071   | 0.0517 | 39    | 229        | 238      | FYAPWCGHCK               |           |         | Carbamidomethyl (C)[6,9]  |      | Mascot      |
| 1965.8541           | 1965.9304   | 0.0763 | 39    | 129        | 144      | VDCTQHYELCSGNQVR         |           |         | Carbamidomethyl (C)[3,10] |      | Mascot      |
| 1965.8541           | 1965.9304   | 0.0763 | 39    | 129        | 144      | VDCTQHYELCSGNQVR         | 105       | 100     | Carbamidomethyl (C)[3,10] |      | Mascot      |
| 2193.155            | 2193.2393   | 0.0843 | 38    | 106        | 125      | ALAPTWEQLALGLEHSET<br>VK |           |         |                           |      | Mascot      |
| 2193.155            | 2193.2393   | 0.0843 | 38    | 106        | 125      | ALAPTWEQLALGLEHSET<br>VK | 99        | 100     |                           |      | Mascot      |
| 2264.0547           | 2264.1379   | 0.0832 | 37    | 126        | 144      | IGKVDCTQHYELCSGNQ<br>VR  |           |         | Carbamidomethyl (C)[6,13] |      | Mascot      |

8 thioredoxin domain-containing protein 5 isoform 3 [Homo sapiens]

| Peptide Information |             |        |       |            |          |            |           |         |                          | Rank | Result Type |
|---------------------|-------------|--------|-------|------------|----------|------------|-----------|---------|--------------------------|------|-------------|
| Calc. Mass          | Obsrv. Mass | ± da   | ± ppm | Start Seq. | End Seq. | Sequence   | Ion Score | C. I. % | Modification             |      |             |
| 1079.6248           | 1079.6656   | 0.0408 | 38    | 287        | 295      | GYPTLLLF   |           |         |                          |      | Mascot      |
| 1079.6248           | 1079.6656   | 0.0408 | 38    | 287        | 295      | GYPTLLLF   | 54        | 97.384  |                          |      | Mascot      |
| 1152.62             | 1152.6676   | 0.0476 | 41    | 153        | 161      | GYPTLLWFR  | 51        | 94.757  |                          |      | Mascot      |
| 1152.62             | 1152.6676   | 0.0476 | 41    | 153        | 161      | GYPTLLWFR  |           |         |                          |      | Mascot      |
| 1309.5604           | 1309.609    | 0.0486 | 37    | 104        | 113      | FFAPWCGHCK |           |         | Carbamidomethyl (C)[6,9] |      | Mascot      |

|                                                            |                               |           |        |            |          |                    |                    |         |                           |                           |             |         |      |     |     |     |     |     |
|------------------------------------------------------------|-------------------------------|-----------|--------|------------|----------|--------------------|--------------------|---------|---------------------------|---------------------------|-------------|---------|------|-----|-----|-----|-----|-----|
| 9                                                          | 1325.5554                     | 1325.6071 | 0.0517 | 39         | 237      | 246                | FYAPWCGCHK         | 63      | 99.652                    | Carbamidomethyl (C)[6,9]  | Mascot      |         |      |     |     |     |     |     |
|                                                            | 1325.5554                     | 1325.6071 | 0.0517 | 39         | 237      | 246                | FYAPWCGCHK         | 63      | 99.652                    | Carbamidomethyl (C)[6,9]  | Mascot      |         |      |     |     |     |     |     |
|                                                            | 1965.8541                     | 1965.9304 | 0.0763 | 39         | 137      | 152                | VDCTQHYELCSGNQVR   | 105     | 100                       | Carbamidomethyl (C)[3,10] | Mascot      |         |      |     |     |     |     |     |
|                                                            | 1965.8541                     | 1965.9304 | 0.0763 | 39         | 137      | 152                | VDCTQHYELCSGNQVR   | 105     | 100                       | Carbamidomethyl (C)[3,10] | Mascot      |         |      |     |     |     |     |     |
|                                                            | 2193.155                      | 2193.2393 | 0.0843 | 38         | 114      | 133                | ALAPTWELQALGLEHSET |         |                           |                           | Mascot      |         |      |     |     |     |     |     |
|                                                            |                               |           |        |            |          |                    | VK                 |         |                           |                           |             |         |      |     |     |     |     |     |
|                                                            | 2193.155                      | 2193.2393 | 0.0843 | 38         | 114      | 133                | ALAPTWELQALGLEHSET | 99      | 100                       |                           | Mascot      |         |      |     |     |     |     |     |
|                                                            |                               |           |        |            |          |                    | VK                 |         |                           |                           |             |         |      |     |     |     |     |     |
|                                                            | 2264.0547                     | 2264.1379 | 0.0832 | 37         | 134      | 152                | IGKVDCQTQHYELCSGNQ |         |                           | Carbamidomethyl (C)[6,13] | Mascot      |         |      |     |     |     |     |     |
|                                                            |                               |           |        |            |          |                    | VR                 |         |                           |                           |             |         |      |     |     |     |     |     |
| gjl281353196                                               |                               |           |        |            |          |                    |                    |         |                           |                           | 38467.9     | 5.24    | 7    | 431 | 100 | 373 | 100 |     |
| hypothetical protein PANDA_003023 [Ailuropoda melanoleuca] |                               |           |        |            |          |                    |                    |         |                           |                           |             |         |      |     |     |     |     |     |
| Peptide Information                                        |                               |           |        |            |          |                    |                    |         |                           |                           |             |         |      |     |     |     |     |     |
| Calc. Mass                                                 | Obsrv. Mass                   | ± da      | ± ppm  | Start Seq. | End Seq. | Sequence           | Ion Score          | C. I. % | Modification              | Rank                      | Result      | Type    |      |     |     |     |     |     |
| 1079.6248                                                  | 1079.6656                     | 0.0408    | 38     | 306        | 314      | GYPTLLFFR          |                    |         |                           |                           | Mascot      |         |      |     |     |     |     |     |
| 1079.6248                                                  | 1079.6656                     | 0.0408    | 38     | 306        | 314      | GYPTLLFFR          | 54                 | 97.384  |                           |                           | Mascot      |         |      |     |     |     |     |     |
| 1152.62                                                    | 1152.6676                     | 0.0476    | 41     | 173        | 181      | GYPTLLWFR          | 51                 | 94.757  |                           |                           | Mascot      |         |      |     |     |     |     |     |
| 1152.62                                                    | 1152.6676                     | 0.0476    | 41     | 173        | 181      | GYPTLLWFR          |                    |         |                           |                           | Mascot      |         |      |     |     |     |     |     |
| 1309.5604                                                  | 1309.609                      | 0.0486    | 37     | 124        | 133      | FFAPWCGCHK         |                    |         | Carbamidomethyl (C)[6,9]  |                           | Mascot      |         |      |     |     |     |     |     |
| 1325.5554                                                  | 1325.6071                     | 0.0517    | 39     | 256        | 265      | FYAPWCGCHK         | 63                 | 99.652  | Carbamidomethyl (C)[6,9]  |                           | Mascot      |         |      |     |     |     |     |     |
| 1325.5554                                                  | 1325.6071                     | 0.0517    | 39     | 256        | 265      | FYAPWCGCHK         |                    |         | Carbamidomethyl (C)[6,9]  |                           | Mascot      |         |      |     |     |     |     |     |
| 1965.8541                                                  | 1965.9304                     | 0.0763    | 39     | 157        | 172      | VDCTQHYELCSGNQVR   |                    |         | Carbamidomethyl (C)[3,10] |                           | Mascot      |         |      |     |     |     |     |     |
| 1965.8541                                                  | 1965.9304                     | 0.0763    | 39     | 157        | 172      | VDCTQHYELCSGNQVR   | 105                | 100     | Carbamidomethyl (C)[3,10] |                           | Mascot      |         |      |     |     |     |     |     |
| 2193.155                                                   | 2193.2393                     | 0.0843    | 38     | 134        | 153      | ALAPTWELQALGLEHSET |                    |         |                           |                           | Mascot      |         |      |     |     |     |     |     |
|                                                            |                               |           |        |            |          | VK                 |                    |         |                           |                           |             |         |      |     |     |     |     |     |
| 2193.155                                                   | 2193.2393                     | 0.0843    | 38     | 134        | 153      | ALAPTWELQALGLEHSET | 99                 | 100     |                           |                           | Mascot      |         |      |     |     |     |     |     |
|                                                            |                               |           |        |            |          | VK                 |                    |         |                           |                           |             |         |      |     |     |     |     |     |
| 2264.0547                                                  | 2264.1379                     | 0.0832    | 37     | 154        | 172      | IGKVDCQTQHYELCSGNQ |                    |         | Carbamidomethyl (C)[6,13] |                           | Mascot      |         |      |     |     |     |     |     |
|                                                            |                               |           |        |            |          | VR                 |                    |         |                           |                           |             |         |      |     |     |     |     |     |
| 10                                                         | TXNDC5 protein [Homo sapiens] |           |        |            |          |                    |                    |         |                           |                           | gjl30354488 | 40343.9 | 5.57 | 7   | 429 | 100 | 373 | 100 |
| Peptide Information                                        |                               |           |        |            |          |                    |                    |         |                           |                           |             |         |      |     |     |     |     |     |
| Calc. Mass                                                 | Obsrv. Mass                   | ± da      | ± ppm  | Start Seq. | End Seq. | Sequence           | Ion Score          | C. I. % | Modification              | Rank                      | Result      | Type    |      |     |     |     |     |     |
| 1079.6248                                                  | 1079.6656                     | 0.0408    | 38     | 323        | 331      | GYPTLLFFR          |                    |         |                           |                           | Mascot      |         |      |     |     |     |     |     |
| 1079.6248                                                  | 1079.6656                     | 0.0408    | 38     | 323        | 331      | GYPTLLFFR          | 54                 | 97.384  |                           |                           | Mascot      |         |      |     |     |     |     |     |
| 1152.62                                                    | 1152.6676                     | 0.0476    | 41     | 189        | 197      | GYPTLLWFR          | 51                 | 94.757  |                           |                           | Mascot      |         |      |     |     |     |     |     |
| 1152.62                                                    | 1152.6676                     | 0.0476    | 41     | 189        | 197      | GYPTLLWFR          |                    |         |                           |                           | Mascot      |         |      |     |     |     |     |     |
| 1309.5604                                                  | 1309.609                      | 0.0486    | 37     | 140        | 149      | FFAPWCGCHK         |                    |         | Carbamidomethyl (C)[6,9]  |                           | Mascot      |         |      |     |     |     |     |     |
| 1325.5554                                                  | 1325.6071                     | 0.0517    | 39     | 273        | 282      | FYAPWCGCHK         | 63                 | 99.652  | Carbamidomethyl (C)[6,9]  |                           | Mascot      |         |      |     |     |     |     |     |
| 1325.5554                                                  | 1325.6071                     | 0.0517    | 39     | 273        | 282      | FYAPWCGCHK         |                    |         | Carbamidomethyl (C)[6,9]  |                           | Mascot      |         |      |     |     |     |     |     |
| 1965.8541                                                  | 1965.9304                     | 0.0763    | 39     | 173        | 188      | VDCTQHYELCSGNQVR   |                    |         | Carbamidomethyl (C)[3,10] |                           | Mascot      |         |      |     |     |     |     |     |
| 1965.8541                                                  | 1965.9304                     | 0.0763    | 39     | 173        | 188      | VDCTQHYELCSGNQVR   | 105                | 100     | Carbamidomethyl (C)[3,10] |                           | Mascot      |         |      |     |     |     |     |     |
| 2193.155                                                   | 2193.2393                     | 0.0843    | 38     | 150        | 169      | ALAPTWELQALGLEHSET |                    |         |                           |                           | Mascot      |         |      |     |     |     |     |     |
|                                                            |                               |           |        |            |          | VK                 |                    |         |                           |                           |             |         |      |     |     |     |     |     |
| 2193.155                                                   | 2193.2393                     | 0.0843    | 38     | 150        | 169      | ALAPTWEL           |                    |         |                           |                           |             |         |      |     |     |     |     |     |



[illegible]

|                            |                                                               |                                             |         |       |            |               |                      |              |                           |                                           |                         |               |               |                   |     |
|----------------------------|---------------------------------------------------------------|---------------------------------------------|---------|-------|------------|---------------|----------------------|--------------|---------------------------|-------------------------------------------|-------------------------|---------------|---------------|-------------------|-----|
|                            | 1725.8303                                                     | 1725.6986                                   | -0.1395 | -81   | 64         | 77            | SNEGRQDIAYFOR        |              | 44                        | 78.489                                    |                         | Mascot        |               |                   |     |
|                            | 1771.9912                                                     | 1771.8912                                   | -0.1736 | -98   | 48         | 63            | TGKGVDEVTVNLTNR      |              |                           |                                           |                         | Mascot        |               |                   |     |
|                            | 1777.8636                                                     | 1777.7229                                   | -0.1407 | -79   | 120        | 135           | GLGTDEDSLIEICSR      |              |                           | Carbamidomethyl (C)[14]                   |                         | Mascot        |               |                   |     |
|                            | 1777.8636                                                     | 1777.7229                                   | -0.1407 | -79   | 120        | 135           | GLGTDEDSLIEICSR      |              | 75                        | 99.983                                    | Carbamidomethyl (C)[14] | Mascot        |               |                   |     |
|                            |                                                               | 1777.7229                                   |         |       |            |               |                      |              |                           |                                           |                         | Mascot        |               |                   |     |
|                            | 2155.0667                                                     | 2154.8896                                   | -0.1771 | -82   | 29         | 47            | AYTNFDAQERDALNIETAK  |              | 9                         | 0                                         |                         | Mascot        |               |                   |     |
|                            | 2155.0667                                                     | 2154.8896                                   | -0.1771 | -82   | 29         | 47            | AYTNFDAQERDALNIETAK  |              |                           |                                           |                         | Mascot        |               |                   |     |
|                            | 2211.0632                                                     | 2210.9231                                   | -0.1401 | -63   | 116        | 135           | ASMKGLGTDEDSLIEICSR  |              |                           | Carbamidomethyl (C)[18], Oxidation [M][3] |                         | Mascot        |               |                   |     |
| 7                          | Annexin A2 [Homo sapiens]<br>Peptide Information              |                                             |         |       |            |               |                      | gjl18645167  | 38551.8                   | 7.57                                      | 12                      | 253           | 100           | 152               | 100 |
|                            | Calc. Mass                                                    | Obsrv. Mass                                 | ± da    | ± ppm | Start Seq. | End Seq.      | Sequence             | Ion Score    | C. I. %                   | Modification                              |                         | Rank          | Result Type   |                   |     |
|                            | 1035.5292                                                     | 1035.446                                    | -0.0832 | -80   | 213        | 220           | WISIMTER             |              |                           |                                           |                         |               | Mascot        |                   |     |
|                            | 1051.5242                                                     | 1051.4288                                   | -0.0954 | -91   | 213        | 220           | WISIMTER             |              |                           | Oxidation [M][5]                          |                         |               | Mascot        |                   |     |
|                            | 1111.5531                                                     | 1111.462                                    | -0.0911 | -82   | 69         | 77            | QDIAFAYOR            |              |                           |                                           |                         |               | Mascot        |                   |     |
|                            | 1244.6229                                                     | 1244.5243                                   | -0.0986 | -79   | 136        | 145           | TNQELGEINR           |              |                           |                                           |                         |               | Mascot        |                   |     |
|                            | 1395.697                                                      | 1395.6287                                   | -0.0683 | -49   | 291        | 302           | IMASRSVEDMLK         |              |                           | Oxidation [M][2]                          |                         |               | Mascot        |                   |     |
|                            | 1542.8486                                                     | 1542.7255                                   | -0.1231 | -80   | 50         | 63            | GVDEVTVNLTNR         | 68           | 99.923                    |                                           |                         |               | Mascot        |                   |     |
|                            | 1542.8486                                                     | 1542.7255                                   | -0.1231 | -80   | 50         | 63            | GVDEVTVNLTNR         |              |                           |                                           |                         |               | Mascot        |                   |     |
|                            | 1771.9912                                                     | 1771.8176                                   | -0.1736 | -98   | 48         | 63            | TGKGVDEVTVNLTNR      |              |                           |                                           |                         |               | Mascot        |                   |     |
|                            | 1777.8636                                                     | 1777.7229                                   | -0.1407 | -79   | 120        | 135           | GLGTDEDSLIEICSR      |              |                           | Carbamidomethyl (C)[14]                   |                         |               | Mascot        |                   |     |
|                            | 1777.8636                                                     | 1777.7229                                   | -0.1407 | -79   | 120        | 135           | GLGTDEDSLIEICSR      | 75           | 99.983                    | Carbamidomethyl (C)[14]                   |                         |               | Mascot        |                   |     |
|                            | 1840.9739                                                     | 1840.7905                                   | -0.1834 | -100  | 213        | 227           | WISIMTERSVPHLQK      |              |                           | Oxidation [M][5]                          |                         |               | Mascot        |                   |     |
|                            | 1844.9025                                                     | 1844.7552                                   | -0.1473 | -80   | 11         | 28            | LSELDGHSTPPSAYGSVK   |              |                           |                                           |                         |               | Mascot        |                   |     |
|                            | 2012.96                                                       | 2012.7955                                   | -0.1645 | -82   | 314        | 329           | SLYYYIQODTKGDYOK     |              |                           |                                           |                         |               | Mascot        |                   |     |
|                            | 2155.0667                                                     | 2154.8896                                   | -0.1771 | -82   | 29         | 47            | AYTNFDAQERDALNIETAK  | 9            | 0                         |                                           |                         |               | Mascot        |                   |     |
|                            | 2155.0667                                                     | 2154.8896                                   | -0.1771 | -82   | 29         | 47            | AYTNFDAQERDALNIETAK  |              |                           |                                           |                         |               | Mascot        |                   |     |
|                            | 2211.0632                                                     | 2210.9231                                   | -0.1401 | -63   | 116        | 135           | ASMKGLGTDEDSLIEICSR  |              |                           | Carbamidomethyl (C)[18], Oxidation [M][3] |                         |               | Mascot        |                   |     |
| 8                          | unnamed protein product [Homo sapiens]<br>Peptide Information |                                             |         |       |            |               |                      | gjl194388544 | 21656.1                   | 5.98                                      | 9                       | 243           | 100           | 152               | 100 |
|                            | Calc. Mass                                                    | Obsrv. Mass                                 | ± da    | ± ppm | Start Seq. | End Seq.      | Sequence             | Ion Score    | C. I. %                   | Modification                              |                         | Rank          | Result Type   |                   |     |
|                            | 1111.5531                                                     | 1111.462                                    | -0.0911 | -82   | 69         | 77            | QDIAFAYOR            |              |                           |                                           |                         |               | Mascot        |                   |     |
|                            | 1244.6229                                                     | 1244.5243                                   | -0.0986 | -79   | 136        | 145           | TNQELGEINR           |              |                           |                                           |                         |               | Mascot        |                   |     |
|                            | 1542.8486                                                     | 1542.7255                                   | -0.1231 | -80   | 50         | 63            | GVDEVTVNLTNR         | 68           | 99.923                    |                                           |                         |               | Mascot        |                   |     |
|                            | 1542.8486                                                     | 1542.7255                                   | -0.1231 | -80   | 50         | 63            | GVDEVTVNLTNR         |              |                           |                                           |                         |               | Mascot        |                   |     |
|                            | 1771.9912                                                     | 1771.8176                                   | -0.1736 | -98   | 48         | 63            | TGKGVDEVTVNLTNR      |              |                           |                                           |                         |               | Mascot        |                   |     |
|                            | 1777.8636                                                     | 1777.7229                                   | -0.1407 | -79   | 120        | 135           | GLGTDEDSLIEICSR      |              |                           | Carbamidomethyl (C)[14]                   |                         |               | Mascot        |                   |     |
|                            | 1777.8636                                                     | 1777.7229                                   | -0.1407 | -79   | 120        | 135           | GLGTDEDSLIEICSR      | 75           | 99.983                    | Carbamidomethyl (C)[14]                   |                         |               | Mascot        |                   |     |
|                            | 1844.9025                                                     | 1844.7552                                   | -0.1473 | -80   | 11         | 28            | LSELDGHSTPPSAYGSVK   |              |                           |                                           |                         |               | Mascot        |                   |     |
|                            | 2012.96                                                       | 2012.7955                                   | -0.1645 | -82   | 314        | 329           | SLYYYIQODTKGDYOK     |              |                           |                                           |                         |               | Mascot        |                   |     |
|                            | 2155.0667                                                     | 2154.8896                                   | -0.1771 | -82   | 29         | 47            | AYTNFDAQERDALNIETAK  | 9            | 0                         |                                           |                         |               | Mascot        |                   |     |
|                            | 2155.0667                                                     | 2154.8896                                   | -0.1771 | -82   | 29         | 47            | AYTNFDAQERDALNIETAK  |              |                           |                                           |                         |               | Mascot        |                   |     |
|                            | 2211.0632                                                     | 2210.9231                                   | -0.1401 | -63   | 116        | 135           | ASMKGLGTDEDSLIEICSR  |              |                           | Carbamidomethyl (C)[18], Oxidation [M][3] |                         |               | Mascot        |                   |     |
| 9                          | annexin A2 isoform 2 [Homo sapiens]<br>Peptide Information    |                                             |         |       |            |               |                      | gjl4757756   | 38579.8                   | 7.57                                      | 11                      | 242           | 100           | 152               | 100 |
|                            | Calc. Mass                                                    | Obsrv. Mass                                 | ± da    | ± ppm | Start Seq. | End Seq.      | Sequence             | Ion Score    | C. I. %                   | Modification                              |                         | Rank          | Result Type   |                   |     |
|                            | 1035.5292                                                     | 1035.446                                    | -0.0832 | -80   | 213        | 220           | WISIMTER             |              |                           |                                           |                         |               | Mascot        |                   |     |
|                            | 1051.5242                                                     | 1051.4288                                   | -0.0954 | -91   | 213        | 220           | WISIMTER             |              |                           | Oxidation [M][5]                          |                         |               | Mascot        |                   |     |
|                            | 1111.5531                                                     | 1111.462                                    | -0.0911 | -82   | 69         | 77            | QDIAFAYOR            |              |                           |                                           |                         |               | Mascot        |                   |     |
|                            | 1244.6229                                                     | 1244.5243                                   | -0.0986 | -79   | 136        | 145           | TNQELGEINR           |              |                           |                                           |                         |               | Mascot        |                   |     |
|                            | 1542.8486                                                     | 1542.7255                                   | -0.1231 | -80   | 50         | 63            | GVDEVTVNLTNR         | 68           | 99.923                    |                                           |                         |               | Mascot        |                   |     |
|                            | 1542.8486                                                     | 1542.7255                                   | -0.1231 | -80   | 50         | 63            | GVDEVTVNLTNR         |              |                           |                                           |                         |               | Mascot        |                   |     |
|                            | 1771.9912                                                     | 1771.8176                                   | -0.1736 | -98   | 48         | 63            | TGKGVDEVTVNLTNR      |              |                           |                                           |                         |               | Mascot        |                   |     |
|                            | 1777.8636                                                     | 1777.7229                                   | -0.1407 | -79   | 120        | 135           | GLGTDEDSLIEICSR      |              |                           | Carbamidomethyl (C)[14]                   |                         |               | Mascot        |                   |     |
|                            | 1777.8636                                                     | 1777.7229                                   | -0.1407 | -79   | 120        | 135           | GLGTDEDSLIEICSR      | 75           | 99.983                    | Carbamidomethyl (C)[14]                   |                         |               | Mascot        |                   |     |
|                            | 1840.9739                                                     | 1840.7905                                   | -0.1834 | -100  | 213        | 227           | WISIMTERSVPHLQK      |              |                           | Oxidation [M][5]                          |                         |               | Mascot        |                   |     |
|                            | 1844.9025                                                     | 1844.7552                                   | -0.1473 | -80   | 11         | 28            | LSELDGHSTPPSAYGSVK   |              |                           |                                           |                         |               | Mascot        |                   |     |
|                            | 2012.96                                                       | 2012.7955                                   | -0.1645 | -82   | 314        | 329           | SLYYYIQODTKGDYOK     |              |                           |                                           |                         |               | Mascot        |                   |     |
|                            | 2155.0667                                                     | 2154.8896                                   | -0.1771 | -82   | 29         | 47            | AYTNFDAQERDALNIETAK  | 9            | 0                         |                                           |                         |               | Mascot        |                   |     |
|                            | 2155.0667                                                     | 2154.8896                                   | -0.1771 | -82   | 29         | 47            | AYTNFDAQERDALNIETAK  |              |                           |                                           |                         |               | Mascot        |                   |     |
|                            | 2211.0632                                                     | 2210.9231                                   | -0.1401 | -63   | 116        | 135           | ASMKGLGTDEDSLIEICSR  |              |                           | Carbamidomethyl (C)[18], Oxidation [M][3] |                         |               | Mascot        |                   |     |
| 10                         | Annexin A2 [Homo sapiens]<br>Peptide Information              |                                             |         |       |            |               |                      | gjl73909156  | 40502.8                   | 8.41                                      | 11                      | 241           | 100           | 152               | 100 |
|                            | Calc. Mass                                                    | Obsrv. Mass                                 | ± da    | ± ppm | Start Seq. | End Seq.      | Sequence             | Ion Score    | C. I. %                   | Modification                              |                         | Rank          | Result Type   |                   |     |
|                            | 1035.5292                                                     | 1035.446                                    | -0.0832 | -80   | 231        | 238           | WISIMTER             |              |                           |                                           |                         |               | Mascot        |                   |     |
|                            | 1051.5242                                                     | 1051.4288                                   | -0.0954 | -91   | 231        | 238           | WISIMTER             |              |                           | Oxidation [M][5]                          |                         |               | Mascot        |                   |     |
|                            | 1111.5531                                                     | 1111.462                                    | -0.0911 | -82   | 67         | 95            | QDIAFAYOR            |              |                           |                                           |                         |               | Mascot        |                   |     |
|                            | 1244.6229                                                     | 1244.5243                                   | -0.0986 | -79   | 154        | 163           | TNQELGEINR           |              |                           |                                           |                         |               | Mascot        |                   |     |
|                            | 1542.8486                                                     | 1542.7255                                   | -0.1231 | -80   | 68         | 81            | GVDEVTVNLTNR         | 68           | 99.923                    |                                           |                         |               | Mascot        |                   |     |
|                            | 1542.8486                                                     | 1542.7255                                   | -0.1231 | -80   | 68         | 81            | GVDEVTVNLTNR         |              |                           |                                           |                         |               | Mascot        |                   |     |
|                            | 1771.9912                                                     | 1771.8176                                   | -0.1736 | -98   | 66         | 81            | TGKGVDEVTVNLTNR      |              |                           |                                           |                         |               | Mascot        |                   |     |
|                            | 1777.8636                                                     | 1777.7229                                   | -0.1407 | -79   | 138        | 153           | GLGTDEDSLIEICSR      |              |                           | Carbamidomethyl (C)[14]                   |                         |               | Mascot        |                   |     |
|                            | 1777.8636                                                     | 1777.7229                                   | -0.1407 | -79   | 138        | 153           | GLGTDEDSLIEICSR      |              |                           | Carbamidomethyl (C)[14]                   |                         |               | Mascot        |                   |     |
|                            | 1840.9739                                                     | 1840.7905                                   | -0.1834 | -100  | 231        | 245           | WISIMTERSVPHLQK      | 75           | 99.986                    | Oxidation [M][5]                          |                         |               | Mascot        |                   |     |
|                            | 1844.9025                                                     | 1844.7552                                   | -0.1473 | -80   | 29         | 46            | LSELDGHSTPPSAYGSVK   |              |                           |                                           |                         |               | Mascot        |                   |     |
|                            | 2012.96                                                       | 2012.7955                                   | -0.1645 | -82   | 332        | 347           | SLYYYIQODTKGDYOK     |              |                           |                                           |                         |               | Mascot        |                   |     |
|                            | 2155.0667                                                     | 2154.8896                                   | -0.1771 | -82   | 47         | 65            | AYTNFDAQERDALNIETAK  | 9            | 0                         |                                           |                         |               | Mascot        |                   |     |
|                            | 2155.0667                                                     | 2154.8896                                   | -0.1771 | -82   | 47         | 65            | AYTNFDAQERDALNIETAK  |              |                           |                                           |                         |               | Mascot        |                   |     |
|                            | 2211.0632                                                     | 2210.9231                                   | -0.1401 | -63   | 134        | 153           | ASMKGLGTDEDSLIEICSR  |              |                           | Carbamidomethyl (C)[18], Oxidation [M][3] |                         |               | Mascot        |                   |     |
| Get Idxs/<br>Plate #/ Name | 52/C3<br>[1] 8907                                             | Instr./Gel Origin<br>Instrument Sample Name |         |       |            |               | AB4700/110211A       |              | Process Status<br>Spectra |                                           | Analysis Succeeded<br>8 |               |               |                   |     |
| Rank                       | Protein Name                                                  | Species                                     |         |       |            | Accession No. |                      | Protein MW   | Protein Pep. PI Count     | Protein Score                             | Protein Score           | Protein Score | Protein Score | Total Ion C. I. % |     |
| 1                          | phosphoglycerate mutase 1 [Bos taurus]                        |                                             |         |       |            | gjl77404217   |                      | 28833.8      | 6.67                      | 16                                        | 894                     | 100           | 698           | 100               |     |
|                            | Calc. Mass                                                    | Obsrv. Mass                                 | ± da    | ± ppm | Start Seq. | End Seq.      | Sequence             | Ion Score    | C. I. %                   | Modification                              |                         | Rank          | Result Type   |                   |     |
|                            | 1059.5581                                                     | 1059.4581                                   | -0.1    | -94   | 91         | 100           | HYGLGTGLNK           |              |                           |                                           |                         |               | Mascot        |                   |     |
|                            | 1150.6691                                                     | 1150.5753                                   | -0.0938 | -82   | 181        | 191           | VLIAAHGNSLR          | 81           | 99.997                    |                                           |                         |               | Mascot        |                   |     |
|                            | 1150.6691                                                     | 1150.5753                                   | -0.0938 | -82   | 181        | 191           | VLIAAHGNSLR          |              |                           |                                           |                         |               | Mascot        |                   |     |
|                            | 1306.7701                                                     | 1306.6647                                   | -0.1054 | -81   | 180        | 191           | RVLIAAHGNSLR         |              |                           |                                           |                         |               | Mascot        |                   |     |
|                            | 1342.6134                                                     | 1342.5052                                   | -0.1082 | -81   | 11         | 21            | HGSEWVNLNLR          |              |                           |                                           |                         |               | Mascot        |                   |     |
|                            | 1342.6134                                                     | 1342.5052                                   | -0.1082 | -81   | 11         | 21            | HGSEWVNLNLR          | 110          | 100                       |                                           |                         |               | Mascot        |                   |     |
|                            | 1630.8547                                                     | 1630.7222                                   | -0.1325 | -81   | 91         | 106           | HYGLGTGLNKAETAAK     |              |                           |                                           |                         |               | Mascot        |                   |     |
|                            | 1683.9104                                                     | 1683.7678                                   | -0.1426 | -85   | 163        | 176           | ALPFWNEIVPOIK        |              |                           |                                           |                         |               | Mascot        |                   |     |
|                            | 1683.9104                                                     | 1683.7678                                   | -0.1426 | -85   | 163        | 176           | ALPFWNEIVPOIK        | 75           | 99.986                    |                                           |                         |               | Mascot        |                   |     |
|                            | 1779.7894                                                     | 1779.6439                                   | -0.1455 | -82   | 47         | 61            | DAGYFDICFTSVQK       |              |                           | Carbamidomethyl (C)[9]                    |                         |               | Mascot        |                   |     |
|                            | 1935.8905                                                     | 1935.7341                                   | -0.1564 | -81   | 47         | 62            | DAGYFDICFTSVQKR      |              |                           | Carbamidomethyl (C)[9]                    |                         |               | Mascot        |                   |     |
|                            | 1935.8905                                                     | 1935.7341                                   | -0.1564 | -81   | 47         | 62            | DAGYFDICFTSVQKR      | 137          | 100                       | Carbamidomethyl (C)[9]                    |                         |               | Mascot        |                   |     |
|                            | 1979.877                                                      | 1979.7152                                   | -0.1618 | -82   | 22         | 39            | FSGWYDADLSPAGHEEA K  |              |                           |                                           |                         |               | Mascot        |                   |     |
|                            | 1979.877                                                      | 1979.7152                                   | -0.1618 | -82   | 22         | 39            | FSGWYDADLSPAGHEEA K  | 74           | 99.985                    |                                           |                         |               | Mascot        |                   |     |
|                            | 2115.1267                                                     | 2114.9675                                   | -0.1602 | -80   | 223        | 240           | NLKPQKPMQLGDDETVR    |              |                           |                                           |                         |               | Mascot        |                   |     |
|                            | 2131.1216                                                     | 2130.9534                                   | -0.1682 | -79   | 223        | 240           | NLKPQKPMQLGDDETVR    |              |                           | Oxidation [M][8]                          |                         |               | Mascot        |                   |     |
|                            | 2135.978                                                      | 2135.8044                                   | -0.1736 | -81   | 22         | 40            | FSGWYDADLSPAGHEEA KR | 111          | 100                       |                                           |                         |               | Mascot        |                   |     |
|                            | 2135.978                                                      | 2135.8044                                   | -0.1736 | -81   | 22         | 40            | FSGWYDADLSPAGHEEA    |              |                           |                                           |                         |               | Mascot        |                   |     |

|           |           |         |     |     |     |                              |     |     |                         |  |        |
|-----------|-----------|---------|-----|-----|-----|------------------------------|-----|-----|-------------------------|--|--------|
| 2243.2217 | 2243.0417 | -0.18   | -80 | 223 | 241 | KR<br>NLKPKPMQFLGDEETVR<br>K |     |     |                         |  | Mascot |
| 2259.2166 | 2259.0383 | -0.1783 | -79 | 223 | 241 | NLKPKPMQFLGDEETVR<br>K       |     |     | Oxidation (M)[8]        |  | Mascot |
| 2362.1133 | 2361.9282 | -0.1851 | -78 | 41  | 61  | GGQALRDAGYEDICTFS<br>VQK     |     |     | Carbamidomethyl (C)[15] |  | Mascot |
| 2417.1118 | 2416.927  | -0.1848 | -76 | 118 | 138 | SYDVPPPPMEPDHPFYS<br>NISK    |     |     |                         |  | Mascot |
| 2425.155  | 2424.9614 | -0.1936 | -80 | 142 | 162 | YADLTEDQLPSCESLKDT<br>IAR    |     |     | Carbamidomethyl (C)[12] |  | Mascot |
| 2425.155  | 2424.9614 | -0.1936 | -80 | 142 | 162 | YADLTEDQLPSCESLKDT<br>IAR    | 110 | 100 | Carbamidomethyl (C)[12] |  | Mascot |
| 2433.1067 | 2432.917  | -0.1897 | -78 | 118 | 138 | SYDVPPPPMEPDHPFYS<br>NISK    |     |     | Oxidation (M)[9]        |  | Mascot |
| 2573.2129 | 2573.0076 | -0.2053 | -80 | 117 | 138 | RSYDVPPPPMEPDHPFY<br>SNISK   |     |     |                         |  | Mascot |
| 2589.2078 | 2589.0083 | -0.1995 | -77 | 117 | 138 | RSYDVPPPPMEPDHPFY<br>SNISK   |     |     | Oxidation (M)[10]       |  | Mascot |

2 unnamed protein product [Mus musculus] gij12844989 28684.8 6.67 15 768 100 588 100

| Peptide Information |             |         |       |            |          |                            |           |         |                         |  | Rank | Result | Type |
|---------------------|-------------|---------|-------|------------|----------|----------------------------|-----------|---------|-------------------------|--|------|--------|------|
| Calc. Mass          | Obsrv. Mass | ± da    | ± ppm | Start Seq. | End Seq. | Sequence                   | Ion Score | C. I. % | Modification            |  |      |        |      |
| 1059.5581           | 1059.4581   | -0.1    | -94   | 91         | 100      | HYGGLTGLNK                 |           |         |                         |  |      | Mascot |      |
| 1150.6691           | 1150.5753   | -0.0938 | -82   | 181        | 191      | VLIAAHGNSLR                | 81        | 99.997  |                         |  |      | Mascot |      |
| 1150.6691           | 1150.5753   | -0.0938 | -82   | 181        | 191      | VLIAAHGNSLR                |           |         |                         |  |      | Mascot |      |
| 1306.7701           | 1306.6647   | -0.1054 | -81   | 180        | 191      | RVLIAAHGNSLR               |           |         |                         |  |      | Mascot |      |
| 1630.8547           | 1630.7222   | -0.1325 | -81   | 91         | 106      | HYGGLTGLNKAETAAK           |           |         |                         |  |      | Mascot |      |
| 1683.9104           | 1683.7678   | -0.1426 | -85   | 163        | 176      | ALPFWNEIVPOIK              |           |         |                         |  |      | Mascot |      |
| 1683.9104           | 1683.7678   | -0.1426 | -85   | 163        | 176      | ALPFWNEIVPOIK              | 75        | 99.986  |                         |  |      | Mascot |      |
| 1779.7894           | 1779.6439   | -0.1455 | -82   | 47         | 61       | DAGYEDICTFSVQK             |           |         | Carbamidomethyl (C)[9]  |  |      | Mascot |      |
| 1935.8905           | 1935.7341   | -0.1564 | -81   | 47         | 62       | DAGYEDICTFSVQKR            |           |         | Carbamidomethyl (C)[9]  |  |      | Mascot |      |
| 1935.8905           | 1935.7341   | -0.1564 | -81   | 47         | 62       | DAGYEDICTFSVQKR            | 137       | 100     | Carbamidomethyl (C)[9]  |  |      | Mascot |      |
| 1979.877            | 1979.7152   | -0.1618 | -82   | 22         | 39       | FSGWYDADLSPAGHEEA<br>K     |           |         |                         |  |      | Mascot |      |
| 1979.877            | 1979.7152   | -0.1618 | -82   | 22         | 39       | FSGWYDADLSPAGHEEA<br>K     | 74        | 99.985  |                         |  |      | Mascot |      |
| 2115.1267           | 2114.9575   | -0.1692 | -80   | 223        | 240      | NLKPKPMQFLGDEETVR          |           |         |                         |  |      | Mascot |      |
| 2131.1216           | 2130.9534   | -0.1682 | -79   | 223        | 240      | NLKPKPMQFLGDEETVR          |           |         | Oxidation (M)[8]        |  |      | Mascot |      |
| 2135.978            | 2135.8044   | -0.1736 | -81   | 22         | 40       | FSGWYDADLSPAGHEEA<br>KR    | 111       | 100     |                         |  |      | Mascot |      |
| 2135.978            | 2135.8044   | -0.1736 | -81   | 22         | 40       | FSGWYDADLSPAGHEEA<br>KR    |           |         |                         |  |      | Mascot |      |
| 2243.2217           | 2243.0417   | -0.18   | -80   | 223        | 241      | NLKPKPMQFLGDEETVR<br>K     |           |         |                         |  |      | Mascot |      |
| 2259.2166           | 2259.0383   | -0.1783 | -79   | 223        | 241      | NLKPKPMQFLGDEETVR<br>K     |           |         | Oxidation (M)[8]        |  |      | Mascot |      |
| 2362.1133           | 2361.9282   | -0.1851 | -78   | 41         | 61       | GGQALRDAGYEDICTFS<br>VQK   |           |         | Carbamidomethyl (C)[15] |  |      | Mascot |      |
| 2417.1118           | 2416.927    | -0.1848 | -76   | 118        | 138      | SYDVPPPPMEPDHPFYS<br>NISK  |           |         |                         |  |      | Mascot |      |
| 2425.155            | 2424.9614   | -0.1936 | -80   | 142        | 162      | YADLTEDQLPSCESLKDT<br>IAR  |           |         | Carbamidomethyl (C)[12] |  |      | Mascot |      |
| 2425.155            | 2424.9614   | -0.1936 | -80   | 142        | 162      | YADLTEDQLPSCESLKDT<br>IAR  | 110       | 100     | Carbamidomethyl (C)[12] |  |      | Mascot |      |
| 2433.1067           | 2432.917    | -0.1897 | -78   | 118        | 138      | SYDVPPPPMEPDHPFYS<br>NISK  |           |         | Oxidation (M)[9]        |  |      | Mascot |      |
| 2573.2129           | 2573.0076   | -0.2053 | -80   | 117        | 138      | RSYDVPPPPMEPDHPFY<br>SNISK |           |         |                         |  |      | Mascot |      |
| 2589.2078           | 2589.0083   | -0.1995 | -77   | 117        | 138      | RSYDVPPPPMEPDHPFY<br>SNISK |           |         | Oxidation (M)[10]       |  |      | Mascot |      |

3 PREDICTED: phosphoglycerate mutase 1-like isoform 2 gij194041795 28971.9 6.67 15 767 100 588 100

| Peptide Information |             |         |       |            |          |                            |           |         |                         |  | Rank | Result | Type |
|---------------------|-------------|---------|-------|------------|----------|----------------------------|-----------|---------|-------------------------|--|------|--------|------|
| Calc. Mass          | Obsrv. Mass | ± da    | ± ppm | Start Seq. | End Seq. | Sequence                   | Ion Score | C. I. % | Modification            |  |      |        |      |
| 1059.5581           | 1059.4581   | -0.1    | -94   | 91         | 100      | HYGGLTGLNK                 |           |         |                         |  |      | Mascot |      |
| 1150.6691           | 1150.5753   | -0.0938 | -82   | 181        | 191      | VLIAAHGNSLR                | 81        | 99.997  |                         |  |      | Mascot |      |
| 1150.6691           | 1150.5753   | -0.0938 | -82   | 181        | 191      | VLIAAHGNSLR                |           |         |                         |  |      | Mascot |      |
| 1306.7701           | 1306.6647   | -0.1054 | -81   | 180        | 191      | RVLIAAHGNSLR               |           |         |                         |  |      | Mascot |      |
| 1630.8547           | 1630.7222   | -0.1325 | -81   | 91         | 106      | HYGGLTGLNKAETAAK           |           |         |                         |  |      | Mascot |      |
| 1683.9104           | 1683.7678   | -0.1426 | -85   | 163        | 176      | ALPFWNEIVPOIK              |           |         |                         |  |      | Mascot |      |
| 1683.9104           | 1683.7678   | -0.1426 | -85   | 163        | 176      | ALPFWNEIVPOIK              | 75        | 99.986  |                         |  |      | Mascot |      |
| 1779.7894           | 1779.6439   | -0.1455 | -82   | 47         | 61       | DAGYEDICTFSVQK             |           |         | Carbamidomethyl (C)[9]  |  |      | Mascot |      |
| 1935.8905           | 1935.7341   | -0.1564 | -81   | 47         | 62       | DAGYEDICTFSVQKR            |           |         | Carbamidomethyl (C)[9]  |  |      | Mascot |      |
| 1935.8905           | 1935.7341   | -0.1564 | -81   | 47         | 62       | DAGYEDICTFSVQKR            | 137       | 100     | Carbamidomethyl (C)[9]  |  |      | Mascot |      |
| 1979.877            | 1979.7152   | -0.1618 | -82   | 22         | 39       | FSGWYDADLSPAGHEEA<br>K     |           |         |                         |  |      | Mascot |      |
| 1979.877            | 1979.7152   | -0.1618 | -82   | 22         | 39       | FSGWYDADLSPAGHEEA<br>K     | 74        | 99.985  |                         |  |      | Mascot |      |
| 2115.1267           | 2114.9575   | -0.1692 | -80   | 223        | 240      | NLKPKPMQFLGDEETVR          |           |         |                         |  |      | Mascot |      |
| 2131.1216           | 2130.9534   | -0.1682 | -79   | 223        | 240      | NLKPKPMQFLGDEETVR          |           |         | Oxidation (M)[8]        |  |      | Mascot |      |
| 2135.978            | 2135.8044   | -0.1736 | -81   | 22         | 40       | FSGWYDADLSPAGHEEA<br>KR    | 111       | 100     |                         |  |      | Mascot |      |
| 2135.978            | 2135.8044   | -0.1736 | -81   | 22         | 40       | FSGWYDADLSPAGHEEA<br>KR    |           |         |                         |  |      | Mascot |      |
| 2243.2217           | 2243.0417   | -0.18   | -80   | 223        | 241      | NLKPKPMQFLGDEETVR<br>K     |           |         |                         |  |      | Mascot |      |
| 2259.2166           | 2259.0383   | -0.1783 | -79   | 223        | 241      | NLKPKPMQFLGDEETVR<br>K     |           |         | Oxidation (M)[8]        |  |      | Mascot |      |
| 2362.1133           | 2361.9282   | -0.1851 | -78   | 41         | 61       | GGQALRDAGYEDICTFS<br>VQK   |           |         | Carbamidomethyl (C)[15] |  |      | Mascot |      |
| 2417.1118           | 2416.927    | -0.1848 | -76   | 118        | 138      | SYDVPPPPMEPDHPFYS<br>NISK  |           |         |                         |  |      | Mascot |      |
| 2425.155            | 2424.9614   | -0.1936 | -80   | 142        | 162      | YADLTEDQLPSCESLKDT<br>IAR  |           |         | Carbamidomethyl (C)[12] |  |      | Mascot |      |
| 2425.155            | 2424.9614   | -0.1936 | -80   | 142        | 162      | YADLTEDQLPSCESLKDT<br>IAR  | 110       | 100     | Carbamidomethyl (C)[12] |  |      | Mascot |      |
| 2433.1067           | 2432.917    | -0.1897 | -78   | 118        | 138      | SYDVPPPPMEPDHPFYS<br>NISK  |           |         | Oxidation (M)[9]        |  |      | Mascot |      |
| 2573.2129           | 2573.0076   | -0.2053 | -80   | 117        | 138      | RSYDVPPPPMEPDHPFY<br>SNISK |           |         |                         |  |      | Mascot |      |
| 2589.2078           | 2589.0083   | -0.1995 | -77   | 117        | 138      | RSYDVPPPPMEPDHPFY<br>SNISK |           |         | Oxidation (M)[10]       |  |      | Mascot |      |

4 Chain A, Crystal Structure Of Human B Type Phosphoglycerate Mutase gij67464262 29850.3 6.68 15 766 100 588 100

| Peptide Information |             |         |       |            |          |                  |           |         |                        |  | Rank | Result | Type |
|---------------------|-------------|---------|-------|------------|----------|------------------|-----------|---------|------------------------|--|------|--------|------|
| Calc. Mass          | Obsrv. Mass | ± da    | ± ppm | Start Seq. | End Seq. | Sequence         | Ion Score | C. I. % | Modification           |  |      |        |      |
| 1059.5581           | 1059.4581   | -0.1    | -94   | 91         | 100      | HYGGLTGLNK       |           |         |                        |  |      | Mascot |      |
| 1150.6691           | 1150.5753   | -0.0938 | -82   | 181        | 191      | VLIAAHGNSLR      | 81        | 99.997  |                        |  |      | Mascot |      |
| 1150.6691           | 1150.5753   | -0.0938 | -82   | 181        | 191      | VLIAAHGNSLR      |           |         |                        |  |      | Mascot |      |
| 1306.7701           | 1306.6647   | -0.1054 | -81   | 180        | 191      | RVLIAAHGNSLR     |           |         |                        |  |      | Mascot |      |
| 1630.8547           | 1630.7222   | -0.1325 | -81   | 91         | 106      | HYGGLTGLNKAETAAK |           |         |                        |  |      | Mascot |      |
| 1683.9104           | 1683.7678   | -0.1426 | -85   | 163        | 176      | ALPFWNEIVPOIK    |           |         |                        |  |      | Mascot |      |
| 1683.9104           | 1683.7678   | -0.1426 | -85   | 163        | 176      | ALPFWNEIVPOIK    | 75        | 99.986  |                        |  |      | Mascot |      |
| 1779.7894           | 1779.6439   | -0.1455 | -82   | 47         | 61       | DAGYEDICTFSVQK   |           |         | Carbamidomethyl (C)[9] |  |      | Mascot |      |
| 1935.8905           | 1935.7341   | -0.1564 | -81   | 47         | 62       | DAGYEDICTFSVQKR  |           |         | Carbamidomethyl (C)[9] |  |      | Mascot |      |
| 1935.8905           | 1935.7341   | -0.1564 | -81   | 47         | 62       | DAGYEDICTFSVQKR  | 137       | 100     | Carbamidomethyl (C)[9] |  |      | Mascot |      |

|  |           |           |         |     |     |     |                            |     |        |                         |  |  |  |  |  |  |        |
|--|-----------|-----------|---------|-----|-----|-----|----------------------------|-----|--------|-------------------------|--|--|--|--|--|--|--------|
|  | 1979.877  | 1979.7152 | -0.1618 | -82 | 22  | 39  | FSGWYDADLSPAGHEEA<br>K     |     |        |                         |  |  |  |  |  |  | Mascot |
|  | 1979.877  | 1979.7152 | -0.1618 | -82 | 22  | 39  | FSGWYDADLSPAGHEEA<br>K     | 74  | 99.985 |                         |  |  |  |  |  |  | Mascot |
|  | 2115.1267 | 2114.9575 | -0.1692 | -80 | 223 | 240 | NLKPIKPMQFLGDEETVR         |     |        |                         |  |  |  |  |  |  | Mascot |
|  | 2131.1216 | 2130.9534 | -0.1682 | -79 | 223 | 240 | NLKPIKPMQFLGDEETVR         |     |        |                         |  |  |  |  |  |  | Mascot |
|  | 2135.978  | 2135.8044 | -0.1736 | -81 | 22  | 40  | FSGWYDADLSPAGHEEA<br>KR    | 111 | 100    | Oxidation (M)[8]        |  |  |  |  |  |  | Mascot |
|  | 2135.978  | 2135.8044 | -0.1736 | -81 | 22  | 40  | FSGWYDADLSPAGHEEA<br>KR    |     |        |                         |  |  |  |  |  |  | Mascot |
|  | 2243.2217 | 2243.0417 | -0.18   | -80 | 223 | 241 | NLKPIKPMQFLGDEETVR<br>K    |     |        |                         |  |  |  |  |  |  | Mascot |
|  | 2259.2166 | 2259.0383 | -0.1783 | -79 | 223 | 241 | NLKPIKPMQFLGDEETVR<br>K    |     |        | Oxidation (M)[8]        |  |  |  |  |  |  | Mascot |
|  | 2362.1133 | 2361.9282 | -0.1851 | -78 | 41  | 61  | GGQALRDAGYEDICFTS<br>VQK   |     |        | Carbamidomethyl (C)[15] |  |  |  |  |  |  | Mascot |
|  | 2417.1118 | 2416.927  | -0.1848 | -76 | 118 | 138 | SYDVPPPPMEPDHPFYS<br>NISK  |     |        |                         |  |  |  |  |  |  | Mascot |
|  | 2425.155  | 2424.9614 | -0.1936 | -80 | 142 | 162 | YADLTEDQLPSCESLKDT<br>IAR  |     |        | Carbamidomethyl (C)[12] |  |  |  |  |  |  | Mascot |
|  | 2425.155  | 2424.9614 | -0.1936 | -80 | 142 | 162 | YADLTEDQLPSCESLKDT<br>IAR  | 110 | 100    | Carbamidomethyl (C)[12] |  |  |  |  |  |  | Mascot |
|  | 2433.1067 | 2432.917  | -0.1897 | -78 | 118 | 138 | SYDVPPPPMEPDHPFYS<br>NISK  |     |        | Oxidation (M)[9]        |  |  |  |  |  |  | Mascot |
|  | 2573.2129 | 2573.0076 | -0.2053 | -80 | 117 | 138 | RSYDVPPPPMEPDHPFY<br>SNISK |     |        |                         |  |  |  |  |  |  | Mascot |
|  | 2573.2129 | 2573.0076 | -0.2053 | -80 | 117 | 138 | RSYDVPPPPMEPDHPFY<br>SNISK |     |        |                         |  |  |  |  |  |  | Mascot |
|  | 2589.2078 | 2589.0083 | -0.1995 | -77 | 117 | 138 | RSYDVPPPPMEPDHPFY<br>SNISK |     |        | Oxidation (M)[10]       |  |  |  |  |  |  | Mascot |

5 PREDICTED: similar to Phosphoglycerate mutase 1 (Phosphoglycerate mutase isozyme B) (PGAM-B) (BPG-d) gl|57107225 28803.8 6.67 15 765 100 588 100

Peptide Information

| Calc. Mass | Obsrv. Mass | ± da    | ± ppm | Start Seq. | End Seq. | Sequence                   | Ion Score | C. I. % | Modification            | Rank | Result Type |
|------------|-------------|---------|-------|------------|----------|----------------------------|-----------|---------|-------------------------|------|-------------|
| 1059.5581  | 1059.4581   | -0.1    | -94   | 91         | 100      | HYGGLTGLNK                 |           |         |                         |      | Mascot      |
| 1150.6691  | 1150.5753   | -0.0938 | -82   | 181        | 191      | VLIAAHGNSLR                | 81        | 99.997  |                         |      | Mascot      |
| 1150.6691  | 1150.5753   | -0.0938 | -82   | 181        | 191      | VLIAAHGNSLR                |           |         |                         |      | Mascot      |
| 1306.7701  | 1306.6647   | -0.1054 | -81   | 180        | 191      | RVLIAAHGNSLR               |           |         |                         |      | Mascot      |
| 1630.8547  | 1630.7222   | -0.1325 | -81   | 91         | 106      | HYGGLTGLNKAETAAK           |           |         |                         |      | Mascot      |
| 1683.9104  | 1683.7678   | -0.1426 | -85   | 163        | 176      | ALPFWNEEIVPOIK             | 75        | 99.986  |                         |      | Mascot      |
| 1683.9104  | 1683.7678   | -0.1426 | -85   | 163        | 176      | ALPFWNEEIVPOIK             |           |         |                         |      | Mascot      |
| 1779.7894  | 1779.6439   | -0.1455 | -82   | 47         | 61       | DAGYEDICFTSVQK             |           |         | Carbamidomethyl (C)[9]  |      | Mascot      |
| 1935.8905  | 1935.7341   | -0.1564 | -81   | 47         | 62       | DAGYEDICFTSVQKR            |           |         | Carbamidomethyl (C)[9]  |      | Mascot      |
| 1935.8905  | 1935.7341   | -0.1564 | -81   | 47         | 62       | DAGYEDICFTSVQKR            | 137       | 100     | Carbamidomethyl (C)[9]  |      | Mascot      |
| 1979.877   | 1979.7152   | -0.1618 | -82   | 22         | 39       | FSGWYDADLSPAGHEEA<br>K     |           |         |                         |      | Mascot      |
| 1979.877   | 1979.7152   | -0.1618 | -82   | 22         | 39       | FSGWYDADLSPAGHEEA<br>K     | 74        | 99.985  |                         |      | Mascot      |
| 2115.1267  | 2114.9575   | -0.1692 | -80   | 223        | 240      | NLKPIKPMQFLGDEETVR         |           |         |                         |      | Mascot      |
| 2131.1216  | 2130.9534   | -0.1682 | -79   | 223        | 240      | NLKPIKPMQFLGDEETVR         |           |         | Oxidation (M)[8]        |      | Mascot      |
| 2135.978   | 2135.8044   | -0.1736 | -81   | 22         | 40       | FSGWYDADLSPAGHEEA<br>KR    | 111       | 100     |                         |      | Mascot      |
| 2135.978   | 2135.8044   | -0.1736 | -81   | 22         | 40       | FSGWYDADLSPAGHEEA<br>KR    |           |         |                         |      | Mascot      |
| 2243.2217  | 2243.0417   | -0.18   | -80   | 223        | 241      | NLKPIKPMQFLGDEETVR<br>K    |           |         |                         |      | Mascot      |
| 2259.2166  | 2259.0383   | -0.1783 | -79   | 223        | 241      | NLKPIKPMQFLGDEETVR<br>K    |           |         | Oxidation (M)[8]        |      | Mascot      |
| 2362.1133  | 2361.9282   | -0.1851 | -78   | 41         | 61       | GGQALRDAGYEDICFTS<br>VQK   |           |         | Carbamidomethyl (C)[15] |      | Mascot      |
| 2417.1118  | 2416.927    | -0.1848 | -76   | 118        | 138      | SYDVPPPPMEPDHPFYS<br>NISK  |           |         |                         |      | Mascot      |
| 2425.155   | 2424.9614   | -0.1936 | -80   | 142        | 162      | YADLTEDQLPSCESLKDT<br>IAR  |           |         | Carbamidomethyl (C)[12] |      | Mascot      |
| 2425.155   | 2424.9614   | -0.1936 | -80   | 142        | 162      | YADLTEDQLPSCESLKDT<br>IAR  | 110       | 100     | Carbamidomethyl (C)[12] |      | Mascot      |
| 2433.1067  | 2432.917    | -0.1897 | -78   | 118        | 138      | SYDVPPPPMEPDHPFYS<br>NISK  |           |         | Oxidation (M)[9]        |      | Mascot      |
| 2573.2129  | 2573.0076   | -0.2053 | -80   | 117        | 138      | RSYDVPPPPMEPDHPFY<br>SNISK |           |         |                         |      | Mascot      |
| 2589.2078  | 2589.0083   | -0.1995 | -77   | 117        | 138      | RSYDVPPPPMEPDHPFY<br>SNISK |           |         | Oxidation (M)[10]       |      | Mascot      |

6 PREDICTED: phosphoglycerate mutase 1-like isoform 1 [Callithrix jacchus] gl|296207982 28827.9 6.67 14 751 100 588 100

Peptide Information

| Calc. Mass | Obsrv. Mass | ± da    | ± ppm | Start Seq. | End Seq. | Sequence                   | Ion Score | C. I. % | Modification            | Rank | Result Type |
|------------|-------------|---------|-------|------------|----------|----------------------------|-----------|---------|-------------------------|------|-------------|
| 1059.5581  | 1059.4581   | -0.1    | -94   | 91         | 100      | HYGGLTGLNK                 |           |         |                         |      | Mascot      |
| 1150.6691  | 1150.5753   | -0.0938 | -82   | 181        | 191      | VLIAAHGNSLR                | 81        | 99.997  |                         |      | Mascot      |
| 1150.6691  | 1150.5753   | -0.0938 | -82   | 181        | 191      | VLIAAHGNSLR                |           |         |                         |      | Mascot      |
| 1306.7701  | 1306.6647   | -0.1054 | -81   | 180        | 191      | RVLIAAHGNSLR               |           |         |                         |      | Mascot      |
| 1683.9104  | 1683.7678   | -0.1426 | -85   | 163        | 176      | ALPFWNEEIVPOIK             | 75        | 99.986  |                         |      | Mascot      |
| 1683.9104  | 1683.7678   | -0.1426 | -85   | 163        | 176      | ALPFWNEEIVPOIK             |           |         |                         |      | Mascot      |
| 1779.7894  | 1779.6439   | -0.1455 | -82   | 47         | 61       | DAGYEDICFTSVQK             |           |         | Carbamidomethyl (C)[9]  |      | Mascot      |
| 1935.8905  | 1935.7341   | -0.1564 | -81   | 47         | 62       | DAGYEDICFTSVQKR            |           |         | Carbamidomethyl (C)[9]  |      | Mascot      |
| 1935.8905  | 1935.7341   | -0.1564 | -81   | 47         | 62       | DAGYEDICFTSVQKR            | 137       | 100     | Carbamidomethyl (C)[9]  |      | Mascot      |
| 1979.877   | 1979.7152   | -0.1618 | -82   | 22         | 39       | FSGWYDADLSPAGHEEA<br>K     |           |         |                         |      | Mascot      |
| 1979.877   | 1979.7152   | -0.1618 | -82   | 22         | 39       | FSGWYDADLSPAGHEEA<br>K     | 74        | 99.985  |                         |      | Mascot      |
| 2115.1267  | 2114.9575   | -0.1692 | -80   | 223        | 240      | NLKPIKPMQFLGDEETVR         |           |         |                         |      | Mascot      |
| 2131.1216  | 2130.9534   | -0.1682 | -79   | 223        | 240      | NLKPIKPMQFLGDEETVR         |           |         | Oxidation (M)[8]        |      | Mascot      |
| 2135.978   | 2135.8044   | -0.1736 | -81   | 22         | 40       | FSGWYDADLSPAGHEEA<br>KR    | 111       | 100     |                         |      | Mascot      |
| 2135.978   | 2135.8044   | -0.1736 | -81   | 22         | 40       | FSGWYDADLSPAGHEEA<br>KR    |           |         |                         |      | Mascot      |
| 2243.2217  | 2243.0417   | -0.18   | -80   | 223        | 241      | NLKPIKPMQFLGDEETVR<br>K    |           |         |                         |      | Mascot      |
| 2259.2166  | 2259.0383   | -0.1783 | -79   | 223        | 241      | NLKPIKPMQFLGDEETVR<br>K    |           |         | Oxidation (M)[8]        |      | Mascot      |
| 2362.1133  | 2361.9282   | -0.1851 | -78   | 41         | 61       | GGQALRDAGYEDICFTS<br>VQK   |           |         | Carbamidomethyl (C)[15] |      | Mascot      |
| 2417.1118  | 2416.927    | -0.1848 | -76   | 118        | 138      | SYDVPPPPMEPDHPFYS<br>NISK  |           |         |                         |      | Mascot      |
| 2425.155   | 2424.9614   | -0.1936 | -80   | 142        | 162      | YADLTEDQLPSCESLKDT<br>IAR  |           |         | Carbamidomethyl (C)[12] |      | Mascot      |
| 2425.155   | 2424.9614   | -0.1936 | -80   | 142        | 162      | YADLTEDQLPSCESLKDT<br>IAR  | 110       | 100     | Carbamidomethyl (C)[12] |      | Mascot      |
| 2433.1067  | 2432.917    | -0.1897 | -78   | 118        | 138      | SYDVPPPPMEPDHPFYS<br>NISK  |           |         | Oxidation (M)[9]        |      | Mascot      |
| 2573.2129  | 2573.0076   | -0.2053 | -80   | 117        | 138      | RSYDVPPPPMEPDHPFY<br>SNISK |           |         |                         |      | Mascot      |
| 2589.2078  | 2589.0083   | -0.1995 | -77   | 117        | 138      | RSYDVPPPPMEPDHPFY<br>SNISK |           |         | Oxidation (M)[10]       |      | Mascot      |

7 PREDICTED: phosphoglycerate mutase 1 isoform 1 [Macaca mulatta] gl|297302417 25963.3 5.92 13 741 100 588 100

Peptide Information

| Calc. Mass                                      | Obsrv. Mass | ± da    | ± ppm | Start Seq. | End Seq. | Sequence                   | Ion Score   | C. I. % | Modification            | Rank | Result Type |     |     |     |
|-------------------------------------------------|-------------|---------|-------|------------|----------|----------------------------|-------------|---------|-------------------------|------|-------------|-----|-----|-----|
| 1150.6691                                       | 1150.5753   | -0.0938 | -82   | 156        | 166      | VLIAAHGNSLR                | 81          | 99.997  |                         |      | Mascot      |     |     |     |
| 1150.6691                                       | 1150.5753   | -0.0938 | -82   | 156        | 166      | VLIAAHGNSLR                |             |         |                         |      | Mascot      |     |     |     |
| 1306.7701                                       | 1306.6647   | -0.1054 | -81   | 155        | 166      | RVLIAAHGNSLR               |             |         |                         |      | Mascot      |     |     |     |
| 1683.9104                                       | 1683.7678   | -0.1426 | -85   | 138        | 151      | ALPFWNEEIVPOIK             | 75          | 99.986  |                         |      | Mascot      |     |     |     |
| 1683.9104                                       | 1683.7678   | -0.1426 | -85   | 138        | 151      | ALPFWNEEIVPOIK             |             |         |                         |      | Mascot      |     |     |     |
| 1779.7894                                       | 1779.6439   | -0.1455 | -82   | 47         | 61       | DAGYFIDICTSVQK             |             |         | Carbamidomethyl (C)[9]  |      | Mascot      |     |     |     |
| 1935.8905                                       | 1935.7341   | -0.1564 | -81   | 47         | 62       | DAGYFIDICTSVQKR            |             |         | Carbamidomethyl (C)[9]  |      | Mascot      |     |     |     |
| 1935.8905                                       | 1935.7341   | -0.1564 | -81   | 47         | 62       | DAGYFIDICTSVQKR            | 137         | 100     | Carbamidomethyl (C)[9]  |      | Mascot      |     |     |     |
| 1979.877                                        | 1979.7152   | -0.1618 | -82   | 22         | 39       | FSGWYDADLSPAGHEEA<br>K     |             |         |                         |      | Mascot      |     |     |     |
| 1979.877                                        | 1979.7152   | -0.1618 | -82   | 22         | 39       | FSGWYDADLSPAGHEEA<br>K     | 74          | 99.985  |                         |      | Mascot      |     |     |     |
| 2115.1267                                       | 2114.9575   | -0.1692 | -80   | 198        | 215      | NLKPIKPMQFLGDEETVR         |             |         |                         |      | Mascot      |     |     |     |
| 2131.1216                                       | 2130.9534   | -0.1682 | -79   | 198        | 215      | NLKPIKPMQFLGDEETVR         |             |         | Oxidation (M)[8]        |      | Mascot      |     |     |     |
| 2135.978                                        | 2135.8044   | -0.1736 | -81   | 22         | 40       | FSGWYDADLSPAGHEEA<br>KR    | 111         | 100     |                         |      | Mascot      |     |     |     |
| 2135.978                                        | 2135.8044   | -0.1736 | -81   | 22         | 40       | FSGWYDADLSPAGHEEA<br>KR    |             |         |                         |      | Mascot      |     |     |     |
| 2243.2217                                       | 2243.0417   | -0.18   | -80   | 198        | 216      | NLKPIKPMQFLGDEETVR<br>K    |             |         |                         |      | Mascot      |     |     |     |
| 2259.2166                                       | 2259.0383   | -0.1783 | -79   | 198        | 216      | NLKPIKPMQFLGDEETVR<br>K    |             |         | Oxidation (M)[8]        |      | Mascot      |     |     |     |
| 2362.1133                                       | 2361.9282   | -0.1851 | -78   | 41         | 61       | GGQALRDAGYFIDICTFS<br>VQK  |             |         | Carbamidomethyl (C)[15] |      | Mascot      |     |     |     |
| 2417.1118                                       | 2416.927    | -0.1848 | -76   | 93         | 113      | SYDVPPPPMEPDHPFYS<br>NISK  |             |         |                         |      | Mascot      |     |     |     |
| 2425.155                                        | 2424.9614   | -0.1936 | -80   | 117        | 137      | YADLTEDQLPSCESLKDT<br>IAR  |             |         | Carbamidomethyl (C)[12] |      | Mascot      |     |     |     |
| 2425.155                                        | 2424.9614   | -0.1936 | -80   | 117        | 137      | YADLTEDQLPSCESLKDT<br>IAR  | 110         | 100     | Carbamidomethyl (C)[12] |      | Mascot      |     |     |     |
| 2433.1067                                       | 2432.917    | -0.1897 | -78   | 93         | 113      | SYDVPPPPMEPDHPFYS<br>NISK  |             |         | Oxidation (M)[9]        |      | Mascot      |     |     |     |
| 2573.2129                                       | 2573.0076   | -0.2053 | -80   | 92         | 113      | RSYDVPPPPMEPDHPFY<br>SNISK |             |         |                         |      | Mascot      |     |     |     |
| 2589.2078                                       | 2589.0083   | -0.1995 | -77   | 92         | 113      | RSYDVPPPPMEPDHPFY<br>SNISK |             |         | Oxidation (M)[10]       |      | Mascot      |     |     |     |
| PREDICTED: similar to Phosphoglycerate mutase 1 |             |         |       |            |          |                            | gi 73998120 | 25882.2 | 5.92                    | 13   | 738         | 100 | 588 | 100 |

Peptide Information

| Calc. Mass | Obsrv. Mass | ± da      | ± ppm | Start Seq. | End Seq. | Sequence                   | Ion Score | C. I. % | Modification            | Rank | Result Type |
|------------|-------------|-----------|-------|------------|----------|----------------------------|-----------|---------|-------------------------|------|-------------|
| 1150.6691  | 1150.5753   | -0.0938   | -82   | 155        | 165      | VLIAAHGNSLR                | 81        | 99.997  |                         |      | Mascot      |
| 1150.6691  | 1150.5753   | -0.0938   | -82   | 155        | 165      | VLIAAHGNSLR                |           |         |                         |      | Mascot      |
| 1306.7701  | 1306.6647   | -0.1054   | -81   | 154        | 165      | RVLIAAHGNSLR               |           |         |                         |      | Mascot      |
| 1683.9104  | 1683.7678   | -0.1426   | -85   | 137        | 150      | ALPFWNEEIVPOIK             |           |         |                         |      | Mascot      |
| 1683.9104  | 1683.7678   | # -0.1426 | -85   | 137        | 150      | ALPFWNEEIVPOIK             | 75        | 99.986  |                         |      | Mascot      |
| 1779.7894  | 1779.6439   | -0.1455   | -82   | 47         | 61       | DAGYFEDICTSVQK             |           |         | Carbamidomethyl (C)[9]  |      | Mascot      |
| 1935.8905  | 1935.7341   | -0.1564   | -81   | 47         | 62       | DAGYFEDICTSVQKR            |           |         | Carbamidomethyl (C)[9]  |      | Mascot      |
| 1935.8905  | 1935.7341   | -0.1564   | -81   | 47         | 62       | DAGYFEDICTSVQKR            | 137       | 100     | Carbamidomethyl (C)[9]  |      | Mascot      |
| 1979.877   | 1979.7152   | -0.1618   | -82   | 22         | 39       | FSGWYDADLSPAGHEEA<br>K     |           |         |                         |      | Mascot      |
| 1979.877   | 1979.7152   | -0.1618   | -82   | 22         | 39       | FSGWYDADLSPAGHEEA<br>K     | 74        | 99.985  |                         |      | Mascot      |
| 2115.1267  | 2114.9575   | -0.1692   | -80   | 197        | 214      | NLKPIKPMQFLGDEETVR         |           |         |                         |      | Mascot      |
| 2131.1216  | 2130.9534   | -0.1682   | -79   | 197        | 214      | NLKPIKPMQFLGDEETVR         |           |         | Oxidation (M)[8]        |      | Mascot      |
| 2135.978   | 2135.8044   | -0.1736   | -81   | 22         | 40       | FSGWYDADLSPAGHEEA<br>KR    | 111       | 100     |                         |      | Mascot      |
| 2135.978   | 2135.8044   | -0.1736   | -81   | 22         | 40       | FSGWYDADLSPAGHEEA<br>KR    |           |         |                         |      | Mascot      |
| 2243.2217  | 2243.0417   | -0.18     | -80   | 197        | 215      | NLKPIKPMQFLGDEETVR<br>K    |           |         |                         |      | Mascot      |
| 2259.2166  | 2259.0383   | -0.1783   | -79   | 197        | 215      | NLKPIKPMQFLGDEETVR<br>K    |           |         | Oxidation (M)[8]        |      | Mascot      |
| 2362.1133  | 2361.9282   | -0.1851   | -78   | 41         | 61       | GGQALRDAGYEDICTFS<br>VQK   |           |         | Carbamidomethyl (C)[15] |      | Mascot      |
| 2417.1118  | 2416.927    | -0.1848   | -76   | 92         | 112      | SYDVPPPPMEPDHPFYS<br>NISK  |           |         |                         |      | Mascot      |
| 2425.155   | 2424.9614   | -0.1936   | -80   | 116        | 136      | YADLTEDQLPSCESLKD<br>T IAR |           |         | Carbamidomethyl (C)[12] |      | Mascot      |
| 2425.155   | 2424.9614   | -0.1936   | -80   | 116        | 136      | YADLTEDQLPSCESLKD<br>T IAR | 110       | 100     | Carbamidomethyl (C)[12] |      | Mascot      |
| 2433.1067  | 2432.917    | -0.1897   | -78   | 92         | 112      | SYDVPPPPMEPDHPFYS<br>NISK  |           |         | Oxidation (M)[9]        |      | Mascot      |
| 2573.2129  | 2573.0076   | -0.2053   | -80   | 91         | 112      | RSYDVPPPPMEPDHPFY<br>SNISK |           |         |                         |      | Mascot      |
| 2589.2078  | 2589.0083   | -0.1995   | -77   | 91         | 112      | RSYDVPPPPMEPDHPFY<br>SNISK |           |         | Oxidation (M)[10]       |      | Mascot      |

Peptide Information

| Calc. Mass | Obsrv. Mass | ± da    | ± ppm | Start Seq. | End Seq. | Sequence                | Ion Score | C. I. % | Modification            | Rank | Result Type |
|------------|-------------|---------|-------|------------|----------|-------------------------|-----------|---------|-------------------------|------|-------------|
| 1150.6691  | 1150.5753   | -0.0038 | -82   | 181        | 191      | VLIAAHGNSLR             | 81        | 99.997  |                         |      | Mascot      |
| 1150.6691  | 1150.5753   | -0.0038 | -82   | 181        | 191      | VLIAAHGNSLR             |           |         |                         |      | Mascot      |
| 1306.7701  | 1306.6647   | -0.1054 | -81   | 180        | 191      | RVLIAAHGNSLR            |           |         |                         |      | Mascot      |
| 1683.9104  | 1683.7678   | -0.1426 | -85   | 163        | 176      | ALPFWNEEIVPOIK          | 75        | 99.986  |                         |      | Mascot      |
| 1683.9104  | 1683.7678   | -0.1426 | -85   | 163        | 176      | ALPFWNEEIVPOIK          |           |         |                         |      | Mascot      |
| 1779.7894  | 1779.6439   | -0.1455 | -82   | 47         | 61       | DAGYFIDICTSVQK          |           |         | Carbamidomethyl (C)[9]  |      | Mascot      |
| 1935.8905  | 1935.7341   | -0.1564 | -81   | 47         | 62       | DAGYFIDICTSVQKR         |           |         | Carbamidomethyl (C)[9]  |      | Mascot      |
| 1935.8905  | 1935.7341   | -0.1564 | -81   | 47         | 62       | DAGYFIDICTSVQKR         | 137       | 100     | Carbamidomethyl (C)[9]  |      | Mascot      |
| 1979.877   | 1979.7152   | -0.1618 | -82   | 22         | 39       | FSGWYDADLSPAGHEEA K     |           |         |                         |      | Mascot      |
| 1979.877   | 1979.7152   | -0.1618 | -82   | 22         | 39       | FSGWYDADLSPAGHEEA K     | 74        | 99.985  |                         |      | Mascot      |
| 2115.1267  | 2114.9575   | -0.1692 | -80   | 223        | 240      | NLKPIKPMQFLGDEETVR      |           |         |                         |      | Mascot      |
| 2131.1216  | 2130.9534   | -0.1682 | -79   | 223        | 240      | NLKPIKPMQFLGDEETVR      |           |         | Oxidation (M)[8]        |      | Mascot      |
| 2135.978   | 2135.8044   | -0.1736 | -81   | 22         | 40       | FSGWYDADLSPAGHEEA KR    | 111       | 100     |                         |      | Mascot      |
| 2135.978   | 2135.8044   | -0.1736 | -81   | 22         | 40       | FSGWYDADLSPAGHEEA KR    |           |         |                         |      | Mascot      |
| 2243.2217  | 2243.0417   | -0.18   | -80   | 223        | 241      | NLKPIKPMQFLGDEETVR K    |           |         |                         |      | Mascot      |
| 2259.2166  | 2259.0383   | -0.1783 | -79   | 223        | 241      | NLKPIKPMQFLGDEETVR K    |           |         | Oxidation (M)[8]        |      | Mascot      |
| 2362.1133  | 2361.9282   | -0.1851 | -78   | 41         | 61       | GGQALRDAGYFIDICTSVQK    |           |         | Carbamidomethyl (C)[15] |      | Mascot      |
| 2417.1118  | 2416.927    | -0.1848 | -76   | 118        | 138      | SYDVPPPPMEPDHPFYS NISK  |           |         |                         |      | Mascot      |
| 2425.155   | 2424.9614   | -0.1936 | -80   | 142        | 162      | YADLTEDQLPSCESLKDT IAR  |           |         | Carbamidomethyl (C)[12] |      | Mascot      |
| 2425.155   | 2424.9614   | -0.1936 | -80   | 142        | 162      | YADLTEDQLPSCESLKDT IAR  | 110       | 100     | Carbamidomethyl (C)[12] |      | Mascot      |
| 2433.1067  | 2432.917    | -0.1897 | -78   | 118        | 138      | SYDVPPPPMEPDHPFYS NISK  |           |         | Oxidation (M)[9]        |      | Mascot      |
| 2573.2129  | 2573.0076   | -0.2053 | -80   | 117        | 138      | RSYDVPPPPMEPDHPFY SNISK |           |         |                         |      | Mascot      |

|      |                                                                 |             |          |       |            |          |                           |              |                   |                         |               |     |                |     |                    |             |  |
|------|-----------------------------------------------------------------|-------------|----------|-------|------------|----------|---------------------------|--------------|-------------------|-------------------------|---------------|-----|----------------|-----|--------------------|-------------|--|
|      | 2589.2078                                                       | 2589.0083   | -0.1995  | -77   | 117        | 138      | RSYDVPPPMPEDHPFY<br>SNISK |              | Oxidation (M)[10] |                         |               |     |                |     | Mascot             |             |  |
| 10   | phosphoglycerate mutase 1 [Pongo abelii]<br>Peptide Information |             |          |       |            |          |                           | gi 197099877 | 28759.8           | 6.67                    | 13            | 730 | 100            | 588 | 100                |             |  |
|      | Calc. Mass                                                      | Obsrv. Mass | ± da     | ± ppm | Start Seq. | End Seq. | Sequence                  | Ion Score    | C. I. %           | Modification            |               |     |                |     | Rank               | Result Type |  |
|      | 1059.5581                                                       | 1059.4581   | -0.1     | -94   | 91         | 100      | HYGGLTGLNKK               |              |                   |                         |               |     |                |     | Mascot             |             |  |
|      | 1150.6691                                                       | 1150.5753   | -0.0938  | -82   | 181        | 191      | VLIAAHGNSLR               | 81           | 99.997            |                         |               |     |                |     | Mascot             |             |  |
|      | 1150.6691                                                       | 1150.5753   | -0.0938  | -82   | 181        | 191      | VLIAAHGNSLR               |              |                   |                         |               |     |                |     | Mascot             |             |  |
|      | 1306.7701                                                       | 1306.6647   | -0.1054  | -81   | 180        | 191      | RVLIAAHGNSLR              |              |                   |                         |               |     |                |     | Mascot             |             |  |
|      | 1630.8547                                                       | 1630.7222   | -0.1325  | -81   | 91         | 106      | HYGGLTGLNKAETAAK          |              |                   |                         |               |     |                |     | Mascot             |             |  |
|      | 1683.9104                                                       | 1683.7678   | -0.1426  | -85   | 163        | 176      | ALPFWNEEIVPOIK            |              |                   |                         |               |     |                |     | Mascot             |             |  |
|      | 1683.9104                                                       | 1683.7678   | -0.1426  | -85   | 163        | 176      | ALPFWNEEIVPOIK            | 75           | 99.986            |                         |               |     |                |     | Mascot             |             |  |
|      | 1779.7894                                                       | 1779.6439   | -0.1455  | -82   | 47         | 61       | DAGYFDFICTSVQKR           |              |                   | Carbamidomethyl (C)[9]  |               |     |                |     | Mascot             |             |  |
|      | 1935.8905                                                       | 1935.7341   | -0.1564  | -81   | 47         | 62       | DAGYFDFICTSVQKR           |              |                   | Carbamidomethyl (C)[9]  |               |     |                |     | Mascot             |             |  |
|      | 1935.8905                                                       | 1935.7341   | -0.1564  | -81   | 47         | 62       | DAGYFDFICTSVQKR           | 137          | 100               | Carbamidomethyl (C)[9]  |               |     |                |     | Mascot             |             |  |
|      | 1979.877                                                        | 1979.7152   | -0.1618  | -82   | 22         | 39       | FSGWYDADLSPAGHEEA<br>K    |              |                   |                         |               |     |                |     | Mascot             |             |  |
|      | 1979.877                                                        | 1979.7152   | -0.1618  | -82   | 22         | 39       | FSGWYDADLSPAGHEEA<br>K    | 74           | 99.985            |                         |               |     |                |     | Mascot             |             |  |
|      | 2135.978                                                        | 2135.8044   | -0.1736  | -81   | 22         | 40       | FSGWYDADLSPAGHEEA<br>KR   | 111          | 100               |                         |               |     |                |     | Mascot             |             |  |
|      | 2135.978                                                        | 2135.8044   | -0.1736  | -81   | 22         | 40       | FSGWYDADLSPAGHEEA<br>KR   |              |                   |                         |               |     |                |     | Mascot             |             |  |
|      | 2362.1133                                                       | 2361.9282   | -0.1851  | -78   | 41         | 61       | GGQALRDAGYFDFICTS<br>VQK  |              |                   | Carbamidomethyl (C)[15] |               |     |                |     | Mascot             |             |  |
|      | 2417.1118                                                       | 2416.927    | -0.1848  | -76   | 118        | 138      | SYDVPPPMPEDHPFYS<br>NISK  |              |                   |                         |               |     |                |     | Mascot             | Mascot      |  |
|      | 2425.155                                                        | 2424.9614   | -0.1936  | -80   | 142        | 162      | YADLTEDQLPSCESLKDT<br>IAR |              |                   | Carbamidomethyl (C)[12] |               |     |                |     | Mascot             |             |  |
|      | 2425.155                                                        | 2424.9614   | -0.1936  | -80   | 142        | 162      | YADLTEDQLPSCESLKDT<br>IAR | 110          | 100               | Carbamidomethyl (C)[12] |               |     |                |     | Mascot             |             |  |
|      | 2433.1067                                                       | 2432.917    | -0.1897  | -78   | 118        | 138      | SYDVPPPMPEDHPFYS<br>NISK  |              |                   | Oxidation (M)[9]        |               |     |                |     | Mascot             |             |  |
|      | 2573.2129                                                       | 2573.0076   | -0.2053  | -80   | 117        | 138      | RSYDVPPPMPEDHPFY<br>SNISK |              |                   |                         |               |     |                |     | Mascot             |             |  |
|      | 2589.2078                                                       | 2589.0083   | -0.1995  | -77   | 117        | 138      | RSYDVPPPMPEDHPFY<br>SNISK |              |                   | Oxidation (M)[10]       |               |     |                |     | Mascot             |             |  |
|      | Gel Idx/Pos                                                     |             | 64/C4    |       |            |          | Instr./Gel Origin         |              | AB4700/110211A    |                         |               |     | Process Status |     | Analysis Succeeded |             |  |
|      | Plate (#) Name                                                  |             | [1] 8907 |       |            |          | Sample Name               |              |                   |                         |               |     | Spectra        |     | 8                  |             |  |
| Rank | Protein Name                                                    |             |          |       | Species    |          | Accession No.             |              | Protein MW        |                         | Protein       |     | Pep. Count     |     | Protein Score      |             |  |
|      |                                                                 |             |          |       |            |          |                           |              |                   |                         | Protein Score |     | Protein Score  |     | Protein Score      |             |  |
|      |                                                                 |             |          |       |            |          |                           |              |                   |                         | Protein Score |     | Protein Score  |     | Protein Score      |             |  |
|      |                                                                 |             |          |       |            |          |                           |              |                   |                         | Protein Score |     | Protein Score  |     | Protein Score      |             |  |
|      |                                                                 |             |          |       |            |          |                           |              |                   |                         | Protein Score |     | Protein Score  |     | Protein Score      |             |  |
|      |                                                                 |             |          |       |            |          |                           |              |                   |                         | Protein Score |     | Protein Score  |     | Protein Score      |             |  |
|      |                                                                 |             |          |       |            |          |                           |              |                   |                         | Protein Score |     | Protein Score  |     | Protein Score      |             |  |
|      |                                                                 |             |          |       |            |          |                           |              |                   |                         | Protein Score |     | Protein Score  |     | Protein Score      |             |  |
|      |                                                                 |             |          |       |            |          |                           |              |                   |                         | Protein Score |     | Protein Score  |     | Protein Score      |             |  |
|      |                                                                 |             |          |       |            |          |                           |              |                   |                         | Protein Score |     | Protein Score  |     | Protein Score      |             |  |
|      |                                                                 |             |          |       |            |          |                           |              |                   |                         | Protein Score |     | Protein Score  |     | Protein Score      |             |  |
|      |                                                                 |             |          |       |            |          |                           |              |                   |                         | Protein Score |     | Protein Score  |     | Protein Score      |             |  |
|      |                                                                 |             |          |       |            |          |                           |              |                   |                         | Protein Score |     | Protein Score  |     | Protein Score      |             |  |
|      |                                                                 |             |          |       |            |          |                           |              |                   |                         | Protein Score |     | Protein Score  |     | Protein Score      |             |  |
|      |                                                                 |             |          |       |            |          |                           |              |                   |                         | Protein Score |     | Protein Score  |     | Protein Score      |             |  |
|      |                                                                 |             |          |       |            |          |                           |              |                   |                         | Protein Score |     | Protein Score  |     | Protein Score      |             |  |
|      |                                                                 |             |          |       |            |          |                           |              |                   |                         | Protein Score |     | Protein Score  |     | Protein Score      |             |  |
|      |                                                                 |             |          |       |            |          |                           |              |                   |                         | Protein Score |     | Protein Score  |     | Protein Score      |             |  |
|      |                                                                 |             |          |       |            |          |                           |              |                   |                         | Protein Score |     | Protein Score  |     | Protein Score      |             |  |
|      |                                                                 |             |          |       |            |          |                           |              |                   |                         | Protein Score |     | Protein Score  |     | Protein Score      |             |  |
|      |                                                                 |             |          |       |            |          |                           |              |                   |                         | Protein Score |     | Protein Score  |     | Protein Score      |             |  |
|      |                                                                 |             |          |       |            |          |                           |              |                   |                         | Protein Score |     | Protein Score  |     | Protein Score      |             |  |
|      |                                                                 |             |          |       |            |          |                           |              |                   |                         | Protein Score |     | Protein Score  |     | Protein Score      |             |  |
|      |                                                                 |             |          |       |            |          |                           |              |                   |                         | Protein Score |     | Protein Score  |     | Protein Score      |             |  |
|      |                                                                 |             |          |       |            |          |                           |              |                   |                         | Protein Score |     | Protein Score  |     | Protein Score      |             |  |
|      |                                                                 |             |          |       |            |          |                           |              |                   |                         | Protein Score |     | Protein Score  |     | Protein Score      |             |  |
|      |                                                                 |             |          |       |            |          |                           |              |                   |                         | Protein Score |     | Protein Score  |     | Protein Score      |             |  |
|      |                                                                 |             |          |       |            |          |                           |              |                   |                         | Protein Score |     | Protein Score  |     | Protein Score      |             |  |
|      |                                                                 |             | </       |       |            |          |                           |              |                   |                         |               |     |                |     |                    |             |  |

|                |                                                                                          |             |           |         |            |          |                         |                       |               |                                            |                  |            |                |                    |                                 |                   |
|----------------|------------------------------------------------------------------------------------------|-------------|-----------|---------|------------|----------|-------------------------|-----------------------|---------------|--------------------------------------------|------------------|------------|----------------|--------------------|---------------------------------|-------------------|
|                |                                                                                          | 1206.6589   | 1206.5798 | -0.0791 | -66        | 180      | 190                     | HLNVNDLPVGR           |               |                                            | 74               | 99.974     |                |                    | Mascot                          |                   |
|                |                                                                                          | 1206.6589   | 1206.5798 | -0.0791 | -66        | 190      | 205                     | HLNVNDLPVGR           |               |                                            |                  |            |                |                    | Mascot                          |                   |
|                |                                                                                          | 1472.8107   | 1472.7192 | -0.0915 | -62        | 154      | 167                     | DYGVLLGPGGLALR        |               |                                            |                  |            |                |                    | Mascot                          |                   |
|                |                                                                                          | 1472.8107   | 1472.7192 | -0.0915 | -62        | 154      | 167                     | DYGVLLGPGGLALR        | 128           | 100                                        | Oxidation (M)[7] |            |                |                    | Mascot                          |                   |
|                |                                                                                          | 2211.1914   | 2210.9609 | -0.2305 | -104       | 133      | 153                     | SGGLGHMNIALSDLTKQ IAR |               |                                            |                  |            |                |                    | Mascot                          |                   |
| 8              | PREDICTED: peroxiredoxin 3-like isoform 1 [Oryctolagus cuniculus]                        |             |           |         |            |          |                         |                       | g l291404901  | 27480.3                                    | 8.33             | 3          | 220            | 100                | 202                             | 100               |
|                | Peptide Information                                                                      |             |           |         |            |          |                         |                       |               |                                            |                  |            |                |                    |                                 |                   |
|                | Calc. Mass                                                                               | Obsrv. Mass | ± da      | ± ppm   | Start Seq. | End Seq. | Sequence                | Ion Score             | C. I. %       | Modification                               |                  |            |                | Rank               | Result Type                     |                   |
|                | 1206.6589                                                                                | 1206.5798   | -0.0791   | -66     | 195        | 205      | HLNVNDLPVGR             |                       |               |                                            |                  |            |                |                    | Mascot                          |                   |
|                | 1206.6589                                                                                | 1206.5798   | -0.0791   | -66     | 195        | 205      | HLNVNDLPVGR             | 74                    | 99.974        |                                            |                  |            |                |                    | Mascot                          |                   |
|                | 1472.8107                                                                                | 1472.7192   | -0.0915   | -62     | 169        | 182      | DYGVLLGPGGLALR          |                       |               |                                            |                  |            |                |                    | Mascot                          |                   |
|                | 1472.8107                                                                                | 1472.7192   | -0.0915   | -62     | 169        | 182      | DYGVLLGPGGLALR          | 128                   | 100           | Oxidation (M)[7]                           |                  |            |                |                    | Mascot                          |                   |
|                | 2211.1914                                                                                | 2210.9609   | -0.2305   | -104    | 148        | 168      | SGGLGHMNIALSDLTKQ IAR   |                       |               |                                            |                  |            |                |                    | Mascot                          |                   |
| 9              | PREDICTED: similar to Aop1_Human, MONES(Aop1_Mouse)-like protein [Monodelphis domestica] |             |           |         |            |          |                         |                       | g l126273047  | 27762.4                                    | 8.39             | 3          | 192            | 100                | 174                             | 100               |
|                | Peptide Information                                                                      |             |           |         |            |          |                         |                       |               |                                            |                  |            |                |                    |                                 |                   |
|                | Calc. Mass                                                                               | Obsrv. Mass | ± da      | ± ppm   | Start Seq. | End Seq. | Sequence                | Ion Score             | C. I. %       | Modification                               |                  |            |                | Rank               | Result Type                     |                   |
|                | 1285.7515                                                                                | 1285.6603   | -0.0912   | -71     | 185        | 196      | GLFIIDPNGVIK            |                       |               |                                            |                  |            |                |                    | Mascot                          |                   |
|                | 1285.7515                                                                                | 1285.6603   | -0.0912   | -71     | 185        | 196      | GLFIIDPNGVIK            | 46                    | 82.032        |                                            |                  |            |                |                    | Mascot                          |                   |
|                | 1472.8107                                                                                | 1472.7192   | -0.0915   | -62     | 171        | 184      | DYGVLLGPGGLALR          |                       |               |                                            |                  |            |                |                    | Mascot                          |                   |
|                | 1472.8107                                                                                | 1472.7192   | -0.0915   | -62     | 171        | 184      | DYGVLLGPGGLALR          | 128                   | 100           |                                            |                  |            |                |                    | Mascot                          |                   |
|                | 2211.1914                                                                                | 2210.9609   | -0.2305   | -104    | 150        | 170      | SGGLGHMNIALSDLTKQ ISR   |                       |               |                                            |                  |            |                |                    | Mascot                          |                   |
| 10             | PREDICTED: hypothetical protein [Ornithorhynchus anatinus]                               |             |           |         |            |          |                         |                       | g l149453537  | 27528                                      | 6.38             | 3          | 192            | 100                | 174                             | 100               |
|                | Peptide Information                                                                      |             |           |         |            |          |                         |                       |               |                                            |                  |            |                |                    |                                 |                   |
|                | Calc. Mass                                                                               | Obsrv. Mass | ± da      | ± ppm   | Start Seq. | End Seq. | Sequence                | Ion Score             | C. I. %       | Modification                               |                  |            |                | Rank               | Result Type                     |                   |
|                | 1165.6099                                                                                | 1165.6592   | 0.0493    | 41      | 79         | 88       | ELTLDDFKIGK             |                       |               |                                            |                  |            |                |                    | Mascot                          |                   |
|                | 1285.7515                                                                                | 1285.6603   | -0.0912   | -71     | 180        | 191      | GLFIIDPNGVIK            | 46                    | 82.032        |                                            |                  |            |                |                    | Mascot                          |                   |
|                | 1285.7515                                                                                | 1285.6603   | -0.0912   | -71     | 180        | 191      | GLFIIDPNGVIK            |                       |               |                                            |                  |            |                |                    | Mascot                          |                   |
|                | 1472.8107                                                                                | 1472.7192   | -0.0915   | -62     | 166        | 179      | DYGVLLGPGGLALR          |                       |               |                                            |                  |            |                |                    | Mascot                          |                   |
|                | 1472.8107                                                                                | 1472.7192   | -0.0915   | -62     | 166        | 179      | DYGVLLGPGGLALR          | 128                   | 100           |                                            |                  |            |                |                    | Mascot                          |                   |
| Get Idx/Pos    | 53/C5                                                                                    |             |           |         |            |          | Instr./Gel Origin       | AB4700/110211A        |               |                                            |                  |            | Process Status | Analysis Succeeded |                                 |                   |
| Plate #[] Name | [1]8907                                                                                  |             |           |         |            |          | Instrument              | Sample Name           |               |                                            |                  |            | Spectra        | 8                  |                                 |                   |
| Rank           | Protein Name                                                                             |             |           |         |            | Species  |                         | Instrument            | Accession No. | Protein MW                                 |                  | Protein PI | Pept. Count    | Protein Score      | Protein Score Total Ion C. I. % | Total Ion C. I. % |
| 1              | glutathione S-transferase P [Bos taurus]                                                 |             |           |         |            |          |                         |                       | g l29135329   | 23598                                      | 6.89             | 7          | 588            | 100                | 516                             | 100               |
|                | Peptide Information                                                                      |             |           |         |            |          |                         |                       |               |                                            |                  |            |                |                    |                                 |                   |
|                | Calc. Mass                                                                               | Obsrv. Mass | ± da      | ± ppm   | Start Seq. | End Seq. | Sequence                | Ion Score             | C. I. %       | Modification                               |                  |            |                | Rank               | Result Type                     |                   |
|                | 1136.5768                                                                                | 1136.5081   | -0.0687   | -60     | 46         | 55       | ASCLYGOLPK              |                       |               | Carbamidomethyl (C)[3]                     |                  |            |                |                    | Mascot                          |                   |
|                | 1536.8209                                                                                | 1536.7285   | -0.0924   | -60     | 2          | 14       | PPYTVFYFPVQGR           | 108                   | 100           |                                            |                  |            |                |                    | Mascot                          |                   |
|                | 1536.8209                                                                                | 1536.7285   | -0.0924   | -60     | 2          | 14       | PPYTVFYFPVQGR           |                       |               |                                            |                  |            |                |                    | Mascot                          |                   |
|                | 1853.9392                                                                                | 1853.8265   | -0.1127   | -61     | 56         | 71       | FQDGDLLTYGSNAIR         |                       |               |                                            |                  |            |                |                    | Mascot                          |                   |
|                | 1853.9392                                                                                | 1853.8265   | -0.1127   | -61     | 56         | 71       | FQDGDLLTYGSNAIR         | 159                   | 100           |                                            |                  |            |                |                    | Mascot                          |                   |
|                | 1964.0963                                                                                | 1963.9735   | -0.1228   | -63     | 122        | 138      | ALPQHLKPFETLLSQNK       |                       |               |                                            |                  |            |                |                    | Mascot                          |                   |
|                | 1964.0963                                                                                | 1963.9735   | -0.1228   | -63     | 122        | 138      | ALPQHLKPFETLLSQNK       | 82                    | 99.996        |                                            |                  |            |                |                    | Mascot                          |                   |
|                | 2155.0593                                                                                | 2154.9292   | -0.1301   | -60     | 104        | 121      | YVSLVNTYEAGKEDYVK       | 57                    | 98.763        |                                            |                  |            |                |                    | Mascot                          |                   |
|                | 2155.0593                                                                                | 2154.9292   | -0.1301   | -60     | 104        | 121      | YVSLVNTYEAGKEDYVK       |                       |               |                                            |                  |            |                |                    | Mascot                          |                   |
|                | 2457.2959                                                                                | 2457.1418   | -0.1541   | -63     | 162        | 183      | IHQVLAPSCDLSFPLLSA YVAR | 109                   | 100           | Carbamidomethyl (C)[9]                     |                  |            |                |                    | Mascot                          |                   |
|                | 2457.2959                                                                                | 2457.1418   | -0.1541   | -63     | 162        | 183      | IHQVLAPSCDLSFPLLSA YVAR |                       |               | Carbamidomethyl (C)[9]                     |                  |            |                |                    | Mascot                          |                   |
|                | 2525.3035                                                                                | 2525.1484   | -0.1551   | -61     | 139        | 161      | GGQAFIVGQISFADYNL LDLR  |                       |               |                                            |                  |            |                |                    | Mascot                          |                   |
| 2              | ReName: Full-Glutathione S-transferase P; AltName: Full-GST class-pi                     |             |           |         |            |          |                         |                       | g l84029298   | 23615.1                                    | 7.66             | 9          | 530            | 100                | 426                             | 100               |
|                | Peptide Information                                                                      |             |           |         |            |          |                         |                       |               |                                            |                  |            |                |                    |                                 |                   |
|                | Calc. Mass                                                                               | Obsrv. Mass | ± da      | ± ppm   | Start Seq. | End Seq. | Sequence                | Ion Score             | C. I. %       | Modification                               |                  |            |                | Rank               | Result Type                     |                   |
|                | 1136.5768                                                                                | 1136.5081   | -0.0687   | -60     | 46         | 55       | ASCLYGOLPK              |                       |               | Carbamidomethyl (C)[3]                     |                  |            |                |                    | Mascot                          |                   |
|                | 1150.6215                                                                                | 1150.5551   | -0.0664   | -58     | 76         | 85       | TLGLYGKDQR              |                       |               |                                            |                  |            |                |                    | Mascot                          |                   |
|                | 1150.6215                                                                                | 1150.5551   | -0.0664   | -58     | 76         | 85       | TLGLYGKDQR              | 76                    | 99.984        |                                            |                  |            |                |                    | Mascot                          |                   |
|                | 1745.8374                                                                                | 1745.7333   | -0.1041   | -60     | 86         | 101      | EALVDMVNDGVEDLR         |                       |               | Oxidation (M)[7]                           |                  |            |                |                    | Mascot                          |                   |
|                | 1761.8323                                                                                | 1761.7261   | -0.1062   | -60     | 86         | 101      | EALVDMVNDGVEDLR         |                       |               |                                            |                  |            |                |                    | Mascot                          |                   |
|                | 1853.9392                                                                                | 1853.8265   | -0.1127   | -61     | 56         | 71       | FQDGDLLTYGSNAIR         |                       |               |                                            |                  |            |                |                    | Mascot                          |                   |
|                | 1853.9392                                                                                | 1853.8265   | -0.1127   | -61     | 56         | 71       | FQDGDLLTYGSNAIR         | 159                   | 100           |                                            |                  |            |                |                    | Mascot                          |                   |
|                | 1964.0963                                                                                | 1963.9735   | -0.1228   | -63     | 122        | 138      | ALPQHLKPFETLLSQNK       |                       |               |                                            |                  |            |                |                    | Mascot                          |                   |
|                | 1964.0963                                                                                | 1963.9735   | -0.1228   | -63     | 122        | 138      | ALPQHLKPFETLLSQNK       | 82                    | 99.996        |                                            |                  |            |                |                    | Mascot                          |                   |
|                | 2033.963                                                                                 | 2033.853    | -0.11     | -54     | 86         | 103      | EALVDMVNDGVEDLRC K      |                       |               | Carbamidomethyl (C)[17]                    |                  |            |                |                    | Mascot                          |                   |
|                | 2049.958                                                                                 | 2049.9194   | -0.0386   | -19     | 86         | 103      | EALVDMVNDGVEDLRC K      |                       |               | Carbamidomethyl (C)[17], Oxidation (M)[7]  |                  |            |                |                    | Mascot                          |                   |
|                | 2164.0312                                                                                | 2164.0322   | 0.001     | 0       | 2          | 19       | ASITYTVFYFPVQGRCEAM R   |                       |               | Carbamidomethyl (C)[14], Oxidation (M)[17] |                  |            |                |                    | Mascot                          |                   |
|                | 2457.2959                                                                                | 2457.1418   | -0.1541   | -63     | 162        | 183      | IHQVLAPSCDLSFPLLSA YVAR | 109                   | 100           | Carbamidomethyl (C)[9]                     |                  |            |                |                    | Mascot                          |                   |
|                | 2457.2959                                                                                | 2457.1418   | -0.1541   | -63     | 162        | 183      | IHQVLAPSCDLSFPLLSA YVAR |                       |               | Carbamidomethyl (C)[9]                     |                  |            |                |                    | Mascot                          |                   |
|                | 2525.3035                                                                                | 2525.1484   | -0.1551   | -61     | 139        | 161      | GGQAFIVGQISFADYNL LDLR  |                       |               |                                            |                  |            |                |                    | Mascot                          |                   |
| 3              | PREDICTED: glutathione S-transferase P-like [Callithrix jacchus]                         |             |           |         |            |          |                         |                       | g l296218948  | 28135.4                                    | 8.52             | 3          | 254            | 100                | 235                             | 100               |
|                | Peptide Information                                                                      |             |           |         |            |          |                         |                       |               |                                            |                  |            |                |                    |                                 |                   |
|                | Calc. Mass                                                                               | Obsrv. Mass | ± da      | ± ppm   | Start Seq. | End Seq. | Sequence                | Ion Score             | C. I. %       | Modification                               |                  |            |                | Rank               | Result Type                     |                   |
|                | 1136.5768                                                                                | 1136.5081   | -0.0687   | -60     | 91         | 100      | ASCLYGOLPK              |                       |               | Carbamidomethyl (C)[3]                     |                  |            |                |                    | Mascot                          |                   |
|                | 1150.6215                                                                                | 1150.5551   | -0.0664   | -58     | 121        | 130      | TLGLYGKDQR              |                       |               |                                            |                  |            |                |                    | Mascot                          |                   |
|                | 1150.6215                                                                                | 1150.5551   | -0.0664   | -58     | 121        | 130      | TLGLYGKDQR              | 76                    | 99.984        |                                            |                  |            |                |                    | Mascot                          |                   |
|                | 1853.9392                                                                                | 1853.8265   | -0.1127   | -61     | 101        | 116      | FQDGDLLTYGSNAIR         |                       |               |                                            |                  |            |                |                    | Mascot                          |                   |
|                | 1853.9392                                                                                | 1853.8265   | -0.1127   | -61     | 101        | 116      | FQDGDLLTYGSNAIR         | 159                   | 100           |                                            |                  |            |                |                    | Mascot                          |                   |
| 4              | PREDICTED: glutathione S-transferase P-like [Callithrix jacchus]                         |             |           |         |            |          |                         |                       | g l296212596  | 23517                                      | 6.89             | 3          | 253            | 100                | 235                             | 100               |
|                | Peptide Information                                                                      |             |           |         |            |          |                         |                       |               |                                            |                  |            |                |                    |                                 |                   |
|                | Calc. Mass                                                                               | Obsrv. Mass | ± da      | ± ppm   | Start Seq. | End Seq. | Sequence                | Ion Score             | C. I. %       | Modification                               |                  |            |                | Rank               | Result Type                     |                   |
|                | 1136.5768                                                                                | 1136.5081   | -0.0687   | -60     | 46         | 55       | ASCLYGOLPK              |                       |               | Carbamidomethyl (C)[3]                     |                  |            |                |                    | Mascot                          |                   |
|                | 1150.6215                                                                                | 1150.5551   | -0.0664   | -58     | 76         | 85       | TLGLYGKDQR              |                       |               |                                            |                  |            |                |                    | Mascot                          |                   |
|                | 1150.6215                                                                                | 1150.5551   | -0.0664   | -58     | 76         | 85       | TLGLYGKDQR              | 76                    | 99.984        |                                            |                  |            |                |                    | Mascot                          |                   |
|                | 1853.9392                                                                                | 1853.8265   | -0.1127   | -61     | 56         | 71       | FQDGDLLTYGSNAIR         |                       |               |                                            |                  |            |                |                    | Mascot                          |                   |
|                | 1853.9392                                                                                | 1853.8265   | -0.1127   | -61     | 56         | 71       | FQDGDLLTYGSNAIR         | 159                   | 100           |                                            |                  |            |                |                    | Mascot                          |                   |
| 5              | PREDICTED: glutathione S-transferase pi 1-like [Oryctolagus cuniculus]                   |             |           |         |            |          |                         |                       | g l291416166  | 23477.2                                    | 7.68             | 3          | 205            | 100                | 184                             | 100               |
|                | Peptide Information                                                                      |             |           |         |            |          |                         |                       |               |                                            |                  |            |                |                    |                                 |                   |
|                | Calc. Mass                                                                               | Obsrv. Mass | ± da      | ± ppm   | Start Seq. | End Seq. | Sequence                | Ion Score             | C. I. %       | Modification                               |                  |            |                | Rank               | Result Type                     |                   |
|                | 1136.5768                                                                                | 1136.5081   | -0.0687   | -60     | 46         | 55       | ASCLYGOLPK              |                       |               | Carbamidomethyl (C)[3]                     |                  |            |                |                    | Mascot                          |                   |
|                | 1150.6215                                                                                | 1150.5551   | -0.0664   | -58     | 76         | 85       | TLGIYGKDQR              |                       |               |                                            |                  |            |                |                    | Mascot                          |                   |
|                | 1150.6215                                                                                | 1150.5551   | -0.0664   | -58     | 76         | 85       | TLGIYGKDQR              | 76                    | 99.984        |                                            |                  |            |                |                    | Mascot                          |                   |

| Gel Idx/Pos  |              | 65/C6    |  | Instr./Gel Origin      |  | AB4700/110211A |  | Process Status |            | Analysis Succeeded |                         |                   |
|--------------|--------------|----------|--|------------------------|--|----------------|--|----------------|------------|--------------------|-------------------------|-------------------|
| Plate #/Name |              | [1] 8907 |  | Instrument Sample Name |  |                |  | Spectra        |            | 8                  |                         |                   |
| Rank         | Protein Name | Species  |  | Accession No.          |  | Protein MW     |  | Protein PI     | Pep. Count | Protein Score      | Protein Total Ion Score | Total Ion C. I. % |

|    |  |                                                                                   |             |         |       |            |          |                 |              |         |              |       |   |     |        |        |        |  |
|----|--|-----------------------------------------------------------------------------------|-------------|---------|-------|------------|----------|-----------------|--------------|---------|--------------|-------|---|-----|--------|--------|--------|--|
|    |  | 1491.7994                                                                         | 1491.7384   | -0.061  | -41   | 15         | 27       | SFPDFPIPGVLFR   |              |         |              |       |   |     | Mascot |        |        |  |
|    |  | 1760.9846                                                                         | 1760.9114   | -0.0732 | -42   | 13         | 27       | IRSFPDFPIPGVLFR | 27           | 0       |              |       |   |     | Mascot |        |        |  |
|    |  | 1760.9846                                                                         | 1760.9114   | -0.0732 | -42   | 13         | 27       | IRSFPDFPIPGVLFR |              |         |              |       |   |     | Mascot |        |        |  |
| 6  |  | adenine phosphoribosyl transferase (predicted), isoform CRA_d [Rattus norvegicus] |             |         |       |            |          |                 | gjl149038399 |         | 7988.2       | 8.2   | 2 | 119 | 100    | 98     | 100    |  |
|    |  | Peptide Information                                                               |             |         |       |            |          |                 |              |         |              |       |   |     |        |        |        |  |
|    |  | Calc. Mass                                                                        | Obsrv. Mass | ± da    | ± ppm | Start Seq. | End Seq. | Sequence        | Ion Score    | C. I. % | Modification |       |   |     | Rank   | Result | Type   |  |
|    |  | 1491.7994                                                                         | 1491.7384   | -0.061  | -41   | 19         | 31       | SFPDFPIPGVLFR   | 71           | 99.942  |              |       |   |     |        |        | Mascot |  |
|    |  | 1491.7994                                                                         | 1491.7384   | -0.061  | -41   | 19         | 31       | SFPDFPIPGVLFR   |              |         |              |       |   |     |        |        | Mascot |  |
|    |  | 1760.9846                                                                         | 1760.9114   | -0.0732 | -42   | 17         | 31       | IRSFDFPIPGVLFR  | 27           | 0       |              |       |   |     |        |        | Mascot |  |
|    |  | 1760.9846                                                                         | 1760.9114   | -0.0732 | -42   | 17         | 31       | IRSFDFPIPGVLFR  |              |         |              |       |   |     |        |        | Mascot |  |
| 7  |  | adenine phosphoribosyl transferase (predicted), isoform CRA_a [Rattus norvegicus] |             |         |       |            |          |                 | gjl149038396 |         | 19943.6      | 6.32  | 3 | 119 | 100    | 98     | 100    |  |
|    |  | Peptide Information                                                               |             |         |       |            |          |                 |              |         |              |       |   |     |        |        |        |  |
|    |  | Calc. Mass                                                                        | Obsrv. Mass | ± da    | ± ppm | Start Seq. | End Seq. | Sequence        | Ion Score    | C. I. % | Modification |       |   |     | Rank   | Result | Type   |  |
|    |  | 1122.579                                                                          | 1122.5259   | -0.0531 | -47   | 62         | 71       | IDYIALGDSLR     |              |         |              |       |   |     |        |        | Mascot |  |
|    |  | 1491.7994                                                                         | 1491.7384   | -0.061  | -41   | 19         | 31       | SFPDFPIPGVLFR   | 71           | 99.942  |              |       |   |     |        |        | Mascot |  |
|    |  | 1491.7994                                                                         | 1491.7384   | -0.061  | -41   | 19         | 31       | SFPDFPIPGVLFR   |              |         |              |       |   |     |        |        | Mascot |  |
|    |  | 1760.9846                                                                         | 1760.9114   | -0.0732 | -42   | 17         | 31       | IRSFDFPIPGVLFR  | 27           | 0       |              |       |   |     |        |        | Mascot |  |
|    |  | 1760.9846                                                                         | 1760.9114   | -0.0732 | -42   | 17         | 31       | IRSFDFPIPGVLFR  |              |         |              |       |   |     |        |        | Mascot |  |
| 8  |  | adenine phosphoribosyl transferase, isoform CRA_a [Mus musculus]                  |             |         |       |            |          |                 | gjl148679744 |         | 9689.2       | 9.69  | 2 | 118 | 100    | 98     | 100    |  |
|    |  | Peptide Information                                                               |             |         |       |            |          |                 |              |         |              |       |   |     |        |        |        |  |
|    |  | Calc. Mass                                                                        | Obsrv. Mass | ± da    | ± ppm | Start Seq. | End Seq. | Sequence        | Ion Score    | C. I. % | Modification |       |   |     | Rank   | Result | Type   |  |
|    |  | 1491.7994                                                                         | 1491.7384   | -0.061  | -41   | 15         | 27       | SFPDFPIPGVLFR   | 71           | 99.942  |              |       |   |     |        |        | Mascot |  |
|    |  | 1491.7994                                                                         | 1491.7384   | -0.061  | -41   | 15         | 27       | SFPDFPIPGVLFR   |              |         |              |       |   |     |        |        | Mascot |  |
|    |  | 1760.9846                                                                         | 1760.9114   | -0.0732 | -42   | 13         | 27       | IRSFDFPIPGVLFR  | 27           | 0       |              |       |   |     |        |        | Mascot |  |
|    |  | 1760.9846                                                                         | 1760.9114   | -0.0732 | -42   | 13         | 27       | IRSFDFPIPGVLFR  |              |         |              |       |   |     |        |        | Mascot |  |
| 9  |  | adenine phosphoribosyl transferase (predicted), isoform CRA_b [Rattus norvegicus] |             |         |       |            |          |                 | gjl149038397 |         | 10737.6      | 7.96  | 2 | 117 | 100    | 98     | 100    |  |
|    |  | Peptide Information                                                               |             |         |       |            |          |                 |              |         |              |       |   |     |        |        |        |  |
|    |  | Calc. Mass                                                                        | Obsrv. Mass | ± da    | ± ppm | Start Seq. | End Seq. | Sequence        | Ion Score    | C. I. % | Modification |       |   |     | Rank   | Result | Type   |  |
|    |  | 1491.7994                                                                         | 1491.7384   | -0.061  | -41   | 19         | 31       | SFPDFPIPGVLFR   | 71           | 99.942  |              |       |   |     |        |        | Mascot |  |
|    |  | 1491.7994                                                                         | 1491.7384   | -0.061  | -41   | 19         | 31       | SFPDFPIPGVLFR   |              |         |              |       |   |     |        |        | Mascot |  |
|    |  | 1760.9846                                                                         | 1760.9114   | -0.0732 | -42   | 17         | 31       | IRSFDFPIPGVLFR  | 27           | 0       |              |       |   |     |        |        | Mascot |  |
|    |  | 1760.9846                                                                         | 1760.9114   | -0.0732 | -42   | 17         | 31       | IRSFDFPIPGVLFR  |              |         |              |       |   |     |        |        | Mascot |  |
| 10 |  | PREDICTED_40S ribosomal protein S7-like [Calitrix jacchus]                        |             |         |       |            |          |                 | gjl296200560 |         | 24042.2      | 10.12 | 4 | 97  | 99.983 | 66     | 99.813 |  |
|    |  | Peptide Information                                                               |             |         |       |            |          |                 |              |         |              |       |   |     |        |        |        |  |
|    |  | Calc. Mass                                                                        | Obsrv. Mass | ± da    | ± ppm | Start Seq. | End Seq. | Sequence        | Ion Score    | C. I. % | Modification |       |   |     | Rank   | Result | Type   |  |
|    |  | 969.5628                                                                          | 969.5167    | -0.0481 | -48   | 109        |          |                 |              |         |              |       |   |     |        |        |        |  |
